# Supplementary material for: Genotyping of Haliotis discus hannai and machine learning models to predict the heat resistant phenotype based on genotype
Source: Front Genet. 2023 Mar 31;14:1151427. doi: 10.3389/fgene.2023.1151427 (PMC10102348; doi:10.3389/fgene.2023.1151427)
Supplement: Supplementary file 1 [file Table1.XLSX]

## Sheet: 1. GBS Sample Summaries
Supplementary Table 1: Sequence and reference mapping summaries of individual sequence library.
S.No	Sample	Class	Raw reads_M	Raw sequences	Clean reads	Crean sequences	Clean_per_raw_read	Clean_per_raw_bp	GC_contents	Ave	N50	Total_reads	Mapped reads_M	Mapping ratio_%	SRA ID
1	B-case_II-1	Case	7753583	679947987	7677085	571547193	99.0134	84.0575	46.911	74.45	84	7677085	6316010	82.2709	SRR21290060
2	B-case_II-10	Case	8049022	693448448	7983438	588396645	99.1852	84.8508	46.9723	73.7	83	7983438	6544907	81.9811	SRR21290059
3	B-case_II-11	Case	7179156	628877769	7091410	523601081	98.7778	83.2596	46.9575	73.84	83	7091410	5820204	82.074	SRR21289845
4	B-case_II-12	Case	7573312	655206401	7520618	557286144	99.3042	85.0551	47.0593	74.1	83	7520618	6194975	82.3732	SRR21289874
5	B-case_II-13	Case	7849923	683403293	7761562	570758454	98.8744	83.5171	46.8814	73.54	83	7761562	6346567	81.7692	SRR21289824
6	B-case_II-14	Case	9046468	788102529	8973285	666452772	99.191	84.5642	46.9608	74.27	84	8973285	7360018	82.0214	SRR21289813
7	B-case_II-15	Case	7429064	647919649	7377620	548273621	99.3075	84.6206	46.9176	74.32	84	7377620	6087314	82.5105	SRR21289802
8	B-case_II-16	Case	7703644	672640654	7635971	567536554	99.1215	84.3744	47.2054	74.32	84	7635971	6242065	81.7455	SRR21289958
9	B-case_II-17	Case	8028326	694067437	7950222	583095909	99.0271	84.0114	46.9931	73.34	82	7950222	6450416	81.135	SRR21289947
10	B-case_II-18	Case	7985517	692829199	7919282	584803908	99.1706	84.4081	46.9518	73.85	83	7919282	6552366	82.7394	SRR21289936
11	B-case_II-19	Case	7241107	629817626	7181773	529862796	99.1806	84.1296	46.8649	73.78	83	7181773	5835233	81.2506	SRR21290058
12	B-case_II-2	Case	8255264	716305029	8187120	605494974	99.1745	84.5303	46.9275	73.96	83	8187120	6688001	81.6893	SRR21290047
13	B-case_II-20	Case	7674920	662837208	7614481	562143344	99.2125	84.8087	46.6205	73.83	83	7614481	6192669	81.3275	SRR21290036
14	B-case_II-21	Case	8159415	709572765	8089571	601793841	99.144	84.8107	46.8478	74.39	84	8089571	6610829	81.7204	SRR21289993
15	B-case_II-22	Case	8068010	698378624	7990603	587681104	99.0406	84.1494	46.7955	73.55	82	7990603	6580721	82.3557	SRR21289982
16	B-case_II-23	Case	8834586	764102198	8771210	648550568	99.2826	84.8775	46.7692	73.94	83	8771210	7214783	82.2553	SRR21289971
17	B-case_II-24	Case	6316934	550307057	6270936	467141519	99.2718	84.8874	47.1636	74.49	84	6270936	5177663	82.566	SRR21289928
18	B-case_II-25	Case	9145418	794833871	9062400	667411052	99.0922	83.9686	46.9459	73.65	83	9062400	7465221	82.3758	SRR21289917
19	B-case_II-26	Case	8091452	699804467	8021191	591730891	99.1317	84.5566	46.8108	73.77	83	8021191	6578019	82.008	SRR21289906
20	B-case_II-27	Case	8176721	711532146	8110743	604436094	99.1931	84.9485	47.0042	74.52	84	8110743	6650508	81.9963	SRR21289856
21	B-case_II-28	Case	7212392	626772564	7153440	529028254	99.1826	84.4051	46.7781	73.95	83	7153440	5827830	81.4689	SRR21289844
22	B-case_II-29	Case	8534120	739629328	8443037	619793680	98.9327	83.7979	46.8372	73.41	83	8443037	6929884	82.0781	SRR21289833
23	B-case_II-3	Case	7971421	694839343	7906722	585023413	99.1884	84.1955	46.7637	73.99	83	7906722	6524765	82.5217	SRR21290021
24	B-case_II-30	Case	7517122	651692937	7446762	549550896	99.064	84.3267	46.9635	73.8	83	7446762	6097754	81.8846	SRR21290010
25	B-case_II-31	Case	8045978	703249817	7976148	594337479	99.1321	84.513	46.9376	74.51	84	7976148	6481761	81.2643	SRR21289999
26	B-case_II-32	Case	8106758	701993125	8024017	590405677	98.9794	84.1042	46.7872	73.58	83	8024017	6545889	81.5787	SRR21289892
27	B-case_II-33	Case	9243700	808302312	9165964	685691645	99.159	84.8311	46.6597	74.81	86	9165964	7389207	80.6157	SRR21289881
28	B-case_II-34	Case	8277306	713374111	8199273	601409255	99.0573	84.3049	46.7188	73.35	82	8199273	6730257	82.0836	SRR21289877
29	B-case_II-35	Case	8404181	740056215	8334068	623690484	99.1657	84.2761	46.8758	74.84	85	8334068	6901839	82.8148	SRR21289876
30	B-case_II-36	Case	7119046	620154906	7067678	524649438	99.2784	84.5997	47.1095	74.23	83	7067678	5851851	82.7974	SRR21289875
31	B-case_II-37	Case	6639746	572052676	6580678	483225950	99.1104	84.4723	46.9623	73.43	83	6580678	5379215	81.7426	SRR21289873
32	B-case_II-38	Case	8213983	715537338	8135934	602881975	99.0498	84.2558	47.0385	74.1	84	8135934	6674157	82.0331	SRR21289872
33	B-case_II-39	Case	8502664	737600992	8431067	623551406	99.1579	84.5378	46.7223	73.96	83	8431067	6969432	82.6637	SRR21289871
34	B-case_II-4	Case	7552553	658595512	7464857	552962625	98.8389	83.9609	47.3857	74.08	83	7464857	6101485	81.7361	SRR21289870
35	B-case_II-40	Case	8355940	719125284	8285405	609476569	99.1559	84.7525	46.9251	73.56	83	8285405	6789664	81.9473	SRR21289869
36	B-case_II-41	Case	7935435	689529217	7875072	583002946	99.2393	84.5509	47.0593	74.03	83	7875072	6459700	82.0272	SRR21289829
37	B-case_II-42	Case	8821151	763542510	8739418	643970318	99.0734	84.3398	47.0523	73.69	83	8739418	7153227	81.8502	SRR21289828
38	B-case_II-43	Case	8338593	722858425	8270598	610891810	99.1846	84.5106	46.8526	73.86	83	8270598	6775747	81.9257	SRR21289827
39	B-case_II-44	Case	6198473	542646579	6151257	459772338	99.2383	84.7278	47.1594	74.74	85	6151257	5056290	82.1993	SRR21289826
40	B-case_II-45	Case	8196373	712379477	8099157	593636750	98.8139	83.3315	46.7309	73.3	82	8099157	6674292	82.4072	SRR21289825
41	B-case_II-46	Case	8424306	734386310	8354092	620504448	99.1665	84.4929	47.0496	74.28	83	8354092	6834717	81.8128	SRR21289823
42	B-case_II-47	Case	8030467	702707629	7959330	592234354	99.1142	84.2789	47.0594	74.41	84	7959330	6554979	82.3559	SRR21289822
43	B-case_II-48	Case	7579627	657518594	7515494	553384736	99.1539	84.1626	46.9093	73.63	82	7515494	6137037	81.6585	SRR21289821
44	B-case_II-49	Case	8493468	733750514	8403271	616595117	98.938	84.0333	46.8629	73.38	83	8403271	6856065	81.5881	SRR21289820
45	B-case_II-5	Case	8961651	777643226	8886381	655920525	99.1601	84.3472	46.8509	73.81	83	8886381	7291784	82.0557	SRR21289819
46	B-case_II-50	Case	7997102	690406914	7939802	586560793	99.2835	84.9587	47.0327	73.88	83	7939802	6504232	81.9193	SRR21289818
47	B-case_II-51	Case	7784123	686235837	7717713	577908326	99.1469	84.2142	46.9963	74.88	84	7717713	6337701	82.1189	SRR21289817
48	B-case_II-52	Case	8272041	714962590	8193311	603110852	99.0482	84.3556	46.8866	73.61	83	8193311	6721920	82.0416	SRR21289816
49	B-case_II-53	Case	7634935	666776055	7575715	565836439	99.2244	84.8615	47.1031	74.69	84	7575715	6251997	82.5268	SRR21289815
50	B-case_II-54	Case	8452468	732772845	8371410	618243742	99.041	84.3704	46.7832	73.85	83	8371410	6878994	82.1725	SRR21289814
51	B-case_II-55	Case	7650934	669042919	7588990	563242254	99.1904	84.1863	46.9165	74.22	83	7588990	6253865	82.4071	SRR21289812
52	B-case_II-56	Case	8522739	740906432	8427813	620107182	98.8862	83.6957	46.8056	73.58	83	8427813	6904974	81.9308	SRR21289811
53	B-case_II-6	Case	7510411	655187447	7451232	552562682	99.212	84.3366	47.0678	74.16	83	7451232	6144881	82.468	SRR21289810
54	B-case_II-7	Case	6757135	614400361	6705795	517437760	99.2402	84.2183	46.5892	77.16	87	6705795	5531836	82.4934	SRR21289809
55	B-case_II-8	Case	7764452	682157039	7703551	577179435	99.2156	84.6109	46.8328	74.92	84	7703551	6344031	82.352	SRR21289808
56	B-case_II-9	Case	7977191	690657324	7888182	578720496	98.8842	83.7927	46.8449	73.37	83	7888182	6443974	81.6915	SRR21289807
57	C-Case_I-81	Case	11794750	1004362662	11692098	857501047	99.1297	85.3776	46.7073	73.34	84	11692098	9610823	82.1993	SRR21289972
58	C-Case_I-82	Case	10636612	891333760	10525833	756059883	98.9585	84.8234	46.9446	71.83	80	10525833	8744010	83.0719	SRR21289970
59	C-Case_I-83	Case	10531254	889254972	10437317	758785071	99.108	85.3282	47.0213	72.7	82	10437317	8630879	82.6925	SRR21289969
60	C-Case_I-84	Case	9827879	833689382	9748262	711735861	99.1899	85.3718	47.095	73.01	81	9748262	8174299	83.8539	SRR21289968
61	C-Case_I-85	Case	9801840	820931070	9715709	701705344	99.1213	85.4768	46.704	72.22	81	9715709	8039327	82.7457	SRR21289967
62	C-Case_I-86	Case	11817137	1005519489	11701395	854032662	99.0206	84.9345	46.8437	72.99	82	11701395	9767168	83.4701	SRR21289966
63	C-Case_I-87	Case	10820080	919078593	10720934	780526233	99.0837	84.9249	46.8903	72.8	81	10720934	8957482	83.5513	SRR21289965
64	C-Case_I-88	Case	9786383	822265972	9692478	700363805	99.0405	85.1748	47.0101	72.26	81	9692478	8076698	83.3295	SRR21289932
65	G-Case_I-1	Case	9888960	829838139	9811448	712619718	99.2162	85.8745	46.8487	72.63	82	9811448	8121093	82.7716	SRR21289959
66	G-Case_I-10	Case	7828938	683596546	7778355	592161964	99.3539	86.6245	46.4845	76.13	89	7778355	6372774	81.9296	SRR21289957
67	G-Case_I-100	Case	11981862	1021697529	11855382	866127688	98.9444	84.7734	46.6554	73.06	83	11855382	9680196	81.6523	SRR21289956
68	G-Case_I-11	Case	6693074	586270514	6651771	506463229	99.3829	86.3873	46.5933	76.14	86	6651771	5543989	83.3461	SRR21289955
69	G-Case_I-12	Case	7419937	648632074	7374542	563550432	99.3882	86.8829	46.1347	76.42	89	7374542	6123912	83.0413	SRR21289954
70	G-Case_I-13	Case	8070749	706445094	8018203	610740994	99.3489	86.4527	46.869	76.17	87	8018203	6658775	83.0457	SRR21289953
71	G-Case_I-14	Case	8449935	738481195	8389237	636667807	99.2817	86.2131	46.7197	75.89	86	8389237	6965120	83.0245	SRR21289952
72	G-Case_I-15	Case	8499185	744893158	8451606	648117831	99.4402	87.0082	46.2892	76.69	90	8451606	6928391	81.9772	SRR21289951
73	G-Case_I-16	Case	5615507	490843522	5581432	425964731	99.3932	86.7822	46.8731	76.32	87	5581432	4699217	84.1938	SRR21289950
74	G-Case_I-17	Case	7901964	687406585	7849629	594618094	99.3377	86.5017	46.4309	75.75	90	7849629	6391246	81.421	SRR21289949
75	G-Case_I-18	Case	6874562	594279971	6824763	514787422	99.2756	86.6237	46.4001	75.43	86	6824763	5635312	82.5715	SRR21289948
76	G-Case_I-19	Case	7968967	700975600	7915429	605041311	99.3282	86.3142	46.8235	76.44	88	7915429	6586867	83.2155	SRR21289946
77	G-Case_I-2	Case	8078371	700438091	8024923	607070368	99.3384	86.6701	46.7846	75.65	87	8024923	6669638	83.1116	SRR21289945
78	G-Case_I-20	Case	6573896	573337059	6527067	494347374	99.2877	86.2228	46.6484	75.74	87	6527067	5414856	82.96	SRR21289944
79	G-Case_I-21	Case	8497588	741283602	8427762	638542967	99.1783	86.1402	46.4799	75.77	89	8427762	6947997	82.4418	SRR21289943
80	G-Case_I-22	Case	7334600	641827382	7279690	552875313	99.2514	86.1408	46.6679	75.95	87	7279690	6081278	83.5376	SRR21289942
81	G-Case_I-23	Case	7362924	643924371	7308827	555721134	99.2653	86.3022	46.7798	76.03	86	7308827	6050796	82.7875	SRR21289941
82	G-Case_I-24	Case	8294788	724973312	8230883	626990066	99.2296	86.4846	46.4476	76.18	90	8230883	6657357	80.8827	SRR21289940
83	G-Case_I-25	Case	7693908	665786512	7643389	578034155	99.3434	86.8197	46.7411	75.63	86	7643389	6322853	82.7232	SRR21289939
84	G-Case_I-26	Case	7669274	658928450	7610716	570911837	99.2365	86.6425	46.4182	75.01	87	7610716	6182555	81.2349	SRR21289938
85	G-Case_I-27	Case	7808784	686911863	7755658	593458918	99.3197	86.3952	46.6822	76.52	86	7755658	6458870	83.2795	SRR21289937
86	G-Case_I-28	Case	6567146	574040110	6525650	497200189	99.3681	86.6142	46.7847	76.19	88	6525650	5420614	83.0663	SRR21289935
87	G-Case_I-29	Case	6749411	582918571	6701760	502459172	99.294	86.1971	46.7107	74.97	85	6701760	5502688	82.1081	SRR21289934
88	G-Case_I-3	Case	7020824	618318686	6957420	526934981	99.0969	85.2206	46.4825	75.74	86	6957420	5784606	83.143	SRR21289933
89	G-Case_I-30	Case	8170712	711765488	8107165	613618678	99.2223	86.2108	46.6737	75.69	88	8107165	6661335	82.166	SRR21289868
90	G-Case_I-31	Case	7429233	646065457	7375655	556212488	99.2788	86.0923	46.7774	75.41	86	7375655	6137233	83.2093	SRR21289867
91	G-Case_I-32	Case	6498579	562254987	6455100	486718703	99.3309	86.5655	46.7175	75.4	86	6455100	5359469	83.0269	SRR21289866
92	G-Case_I-33	Case	6714155	583953829	6672313	506663331	99.3768	86.7643	46.7605	75.94	87	6672313	5529689	82.8751	SRR21289865
93	G-Case_I-34	Case	7631533	641515342	7575748	553519990	99.269	86.2832	46.955	73.06	83	7575748	6239804	82.3655	SRR21289864
94	G-Case_I-35	Case	7603993	663624880	7552512	572732973	99.323	86.3037	46.7118	75.83	86	7552512	6305820	83.493	SRR21289863
95	G-Case_I-36	Case	5669257	493981588	5631731	428139380	99.3381	86.6711	46.9133	76.02	87	5631731	4672345	82.9646	SRR21289862
96	G-Case_I-37	Case	8705575	728509230	8622845	621093837	99.0497	85.2555	46.8962	72.03	81	8622845	7188494	83.3657	SRR21290057
97	G-Case_I-38	Case	7742976	674520878	7686336	582454900	99.2685	86.3509	46.8459	75.78	87	7686336	6385994	83.0824	SRR21290056
98	G-Case_I-39	Case	6138890	530664290	6095507	459555365	99.2933	86.6	46.9468	75.39	86	6095507	5041527	82.7089	SRR21290055
99	G-Case_I-4	Case	6691858	580486557	6657702	504960470	99.4896	86.9892	46.6629	75.85	87	6657702	5530526	83.0696	SRR21290054
100	G-Case_I-40	Case	7032467	595042706	6980363	512417910	99.2591	86.1145	46.909	73.41	83	6980363	5820596	83.3853	SRR21290053
101	G-Case_I-41	Case	7726612	672195302	7662858	577801983	99.1749	85.9575	46.6044	75.4	86	7662858	6382450	83.2907	SRR21290052
102	G-Case_I-42	Case	7382355	643029742	7335276	556350812	99.3623	86.5202	46.651	75.85	86	7335276	6118234	83.4084	SRR21290051
103	G-Case_I-43	Case	6867681	603251688	6819073	520187300	99.2922	86.2306	46.6502	76.28	87	6819073	5661870	83.0299	SRR21290050
104	G-Case_I-44	Case	8200156	696370892	8138456	599460656	99.2476	86.0835	46.7256	73.66	84	8138456	6699364	82.3174	SRR21290049
105	G-Case_I-45	Case	7114664	625575200	7066665	543464420	99.3254	86.8744	46.7819	76.91	91	7066665	5775262	81.7254	SRR21290048
106	G-Case_I-46	Case	8077548	697591514	8013696	602823256	99.2095	86.4149	46.573	75.22	86	8013696	6662253	83.1358	SRR21290046
107	G-Case_I-47	Case	7175863	625184789	7126007	539619768	99.3052	86.3136	46.7942	75.73	86	7126007	5940654	83.3658	SRR21290045
108	G-Case_I-48	Case	7263042	630722150	7202252	541817728	99.163	85.9043	46.6064	75.23	86	7202252	5992351	83.2011	SRR21290044
109	G-Case_I-49	Case	6419760	553500084	6376556	478169417	99.327	86.3901	46.8902	74.99	85	6376556	5285644	82.8918	SRR21290043
110	G-Case_I-5	Case	7961964	696710117	7896017	599222221	99.1717	86.0074	46.2772	75.89	90	7896017	6399731	81.0501	SRR21290042
111	G-Case_I-50	Case	6913370	601585352	6860550	520776782	99.236	86.5674	46.717	75.91	89	6860550	5561547	81.0656	SRR21290041
112	G-Case_I-51	Case	7251537	622685289	7203881	539579475	99.3428	86.6536	46.664	74.9	87	7203881	5898599	81.8809	SRR21290040
113	G-Case_I-52	Case	6387780	542375582	6350501	470791160	99.4164	86.8017	47.124	74.13	86	6350501	5265038	82.9074	SRR21290039
114	G-Case_I-53	Case	6581858	565529931	6523759	487188964	99.1173	86.1473	46.9442	74.68	84	6523759	5382164	82.501	SRR21290038
115	G-Case_I-54	Case	6565910	569786447	6520088	493220471	99.3021	86.5623	46.9585	75.65	86	6520088	5361925	82.237	SRR21290037
116	G-Case_I-55	Case	9287764	821275363	9193680	696973536	98.987	84.8648	46.8369	75.81	85	9193680	7715984	83.927	SRR21290035
117	G-Case_I-56	Case	12101453	1003092826	11974825	848461349	98.9536	84.5845	47.1707	70.85	79	11974825	10069670	84.0903	SRR21290034
118	G-Case_I-57	Case	12533162	1065162560	12399831	899288288	98.9362	84.4273	46.846	72.52	81	12399831	10370626	83.6352	SRR21290033
119	G-Case_I-58	Case	12248340	1038700813	12147158	886440378	99.1739	85.3413	47.0481	72.98	83	12147158	10148166	83.5435	SRR21290032
120	G-Case_I-59	Case	10212897	872206930	10086211	735642323	98.7595	84.3426	46.8144	72.94	81	10086211	8443624	83.7145	SRR21290031
121	G-Case_I-6	Case	7819041	675900899	7772652	584905036	99.4067	86.5371	46.6392	75.25	86	7772652	6443009	82.8933	SRR21290030
122	G-Case_I-60	Case	9665946	813872021	9594197	695394131	99.2577	85.4427	47.1026	72.48	82	9594197	7970073	83.0718	SRR21290029
123	G-Case_I-61	Case	11489816	977508816	11360395	827190377	98.8736	84.6223	46.5784	72.81	83	11360395	9352945	82.3294	SRR21289996
124	G-Case_I-62	Case	12871931	1095913790	12767131	936587934	99.1858	85.4618	46.8288	73.36	83	12767131	10578016	82.8535	SRR21289995
125	G-Case_I-63	Case	10650867	906317276	10571460	771145296	99.2545	85.0856	47.0076	72.95	82	10571460	8913868	84.3201	SRR21289994
126	G-Case_I-64	Case	10952894	939612503	10862190	799735360	99.1719	85.1133	47.1026	73.63	83	10862190	9152155	84.257	SRR21289992
127	G-Case_I-65	Case	10490984	869950730	10388428	736128785	99.0224	84.6173	47.1612	70.86	79	10388428	8612027	82.9002	SRR21289991
128	G-Case_I-66	Case	9473229	796618518	9390527	676680636	99.127	84.9441	47.0451	72.06	81	9390527	7739985	82.4233	SRR21289990
129	G-Case_I-67	Case	9371533	798138754	9296377	680628912	99.198	85.277	46.8294	73.21	82	9296377	7784923	83.7415	SRR21289989
130	G-Case_I-68	Case	9428735	796783476	9342955	676373647	99.0902	84.888	46.6095	72.39	80	9342955	7840501	83.9189	SRR21289988
131	G-Case_I-69	Case	9982514	858459923	9897318	731143581	99.1465	85.1692	47.0567	73.87	83	9897318	8323809	84.1017	SRR21289987
132	G-Case_I-7	Case	7089691	612913688	7050624	530348037	99.449	86.529	46.7071	75.22	86	7050624	5861854	83.1395	SRR21289986
133	G-Case_I-70	Case	10764399	910779236	10656098	770625314	98.9939	84.6116	46.9563	72.32	81	10656098	8895973	83.4825	SRR21289985
134	G-Case_I-71	Case	12282918	1045775624	12191266	891451644	99.2538	85.2431	46.6944	73.12	83	12191266	10151611	83.2695	SRR21289984
135	G-Case_I-72	Case	6875609	585363431	6819526	500553980	99.1843	85.5117	47.1781	73.4	83	6819526	5707824	83.6983	SRR21289983
136	G-Case_I-73	Case	11413515	971228644	11307100	823569922	99.0676	84.7967	46.935	72.84	82	11307100	9373360	82.898	SRR21289981
137	G-Case_I-74	Case	11315546	954812006	11203843	812644542	99.0128	85.1104	46.8039	72.53	81	11203843	9352577	83.4765	SRR21289980
138	G-Case_I-75	Case	12641832	1052165798	12527945	896392687	99.0991	85.195	47.1565	71.55	80	12527945	10485931	83.7003	SRR21289979
139	G-Case_I-76	Case	9561948	813115954	9477642	693566660	99.1183	85.2974	46.8699	73.18	83	9477642	7883062	83.1754	SRR21289978
140	G-Case_I-77	Case	12847489	1099219355	12704071	929751712	98.8837	84.5829	46.5746	73.19	83	12704071	10463901	82.3665	SRR21289977
141	G-Case_I-78	Case	9822812	828720592	9728410	705137399	99.039	85.0875	47.1198	72.48	82	9728410	8088541	83.1435	SRR21289976
142	G-Case_I-79	Case	9167878	770664376	9083955	658333567	99.0846	85.4242	47.0281	72.47	82	9083955	7373736	81.1732	SRR21289975
143	G-Case_I-8	Case	6372093	552464346	6331798	477526668	99.3676	86.4357	46.6998	75.42	87	6331798	5178811	81.7905	SRR21289974
144	G-Case_I-80	Case	10105854	844303780	9999093	717029579	98.9436	84.9255	46.9072	71.71	81	9999093	8192142	81.9289	SRR21289973
145	G-Case_I-89	Case	11721030	1010798142	11630226	861760881	99.2253	85.2555	46.7418	74.1	85	11630226	9665948	83.1106	SRR21289931
146	G-Case_I-9	Case	7192774	613691521	7141645	529732697	99.2892	86.3191	46.6676	74.18	84	7141645	5907727	82.7222	SRR21289930
147	G-Case_I-90	Case	12284432	1050791852	12169304	891300174	99.0628	84.8218	46.9923	73.24	82	12169304	10230639	84.0692	SRR21289929
148	G-Case_I-91	Case	11832175	1004052276	11724132	852679106	99.0869	84.9238	46.8985	72.73	81	11724132	9851010	84.0234	SRR21289927
149	G-Case_I-92	Case	8289217	703396912	8215899	599711183	99.1155	85.2593	47.3108	72.99	82	8215899	6839003	83.2411	SRR21289926
150	G-Case_I-93	Case	9638871	812282616	9514179	682660161	98.7064	84.0422	46.802	71.75	80	9514179	7846448	82.4711	SRR21289925
151	G-Case_I-94	Case	9605950	806259035	9516297	688605754	99.0667	85.4075	47.2705	72.36	82	9516297	7718850	81.1119	SRR21289924
152	G-Case_I-95	Case	10220331	863063460	10129202	736099581	99.1084	85.2892	47.0238	72.67	82	10129202	8409884	83.0261	SRR21289923
153	G-Case_I-96	Case	9460634	808862678	9360788	685608872	98.9446	84.7621	46.8013	73.24	83	9360788	7705522	82.317	SRR21289922
154	G-Case_I-97	Case	9209432	778109124	9108834	656979897	98.9077	84.4329	47.0239	72.13	80	9108834	7490372	82.232	SRR21289921
155	G-Case_I-98	Case	11426529	972133325	11336872	829920419	99.2154	85.371	46.7999	73.21	81	11336872	9521692	83.9887	SRR21289920
156	G-Case_I-99	Case	10295253	878851687	10201523	750151207	99.0896	85.3558	46.8545	73.53	84	10201523	8325882	81.6141	SRR21289919
157	G-Cont-I-43	Control	7988038	664630036	7917486	558897950	99.1168	84.0916	47.0528	70.59	79	7917486	6443696	81.3856	SRR21289838
158	G-Cont-I-45	Control	8729178	722684223	8646132	604324941	99.0486	83.6223	47.2045	69.9	77	8646132	7091282	82.0168	SRR21289837
159	G-Cont-I-46	Control	7035727	584644932	6973875	487609411	99.1209	83.4027	47.6714	69.92	78	6973875	5715132	81.9506	SRR21289836
160	G-Cont-I-47	Control	6835874	592822838	6778866	496126972	99.166	83.6889	47.0477	73.19	80	6778866	5578444	82.2917	SRR21289835
161	G-Cont-I-48	Control	7716990	639609929	7649994	538007226	99.1318	84.1149	47.2158	70.33	77	7649994	6250980	81.7122	SRR21289834
162	G-Cont-I-49	Control	8370436	701276744	8272616	582002661	98.8314	82.9919	47.2127	70.35	77	8272616	6703571	81.0333	SRR21289832
163	G-Cont-I-50	Control	3068603	258379233	3039959	216092917	99.0665	83.634	48.0185	71.08	79	3039959	2471808	81.3106	SRR21289831
164	G-Cont-I-51	Control	6413421	539601224	6330147	446320251	98.7016	82.713	47.3623	70.51	78	6330147	5124314	80.9509	SRR21289830
165	G-Cont-I-52	Control	6983845	579829504	6930363	490127999	99.2342	84.5297	47.4855	70.72	79	6930363	5675915	81.8992	SRR21290028
166	G-Cont-I-53	Control	9253850	763976169	9146686	632554080	98.842	82.7976	47.3504	69.16	76	9146686	7450488	81.4556	SRR21290027
167	G-Cont-I-54	Control	8673976	722575119	8601802	606832759	99.1679	83.982	47.3729	70.55	77	8601802	6980400	81.1504	SRR21290026
168	G-Cont-I-55	Control	6719521	563774897	6668611	474665399	99.2424	84.1941	47.2575	71.18	78	6668611	5468546	82.0043	SRR21290025
169	G-Cont-I-56	Control	7707647	647511678	7636467	543137518	99.0765	83.8807	47.6396	71.12	78	7636467	6270350	82.1106	SRR21290024
170	G-Cont-I-57	Control	7839439	653550969	7758636	544815071	98.9693	83.3623	47.5919	70.22	77	7758636	6271386	80.831	SRR21290023
171	G-Cont-I-58	Control	8072047	676954102	8000397	570705269	99.1124	84.3049	47.1717	71.33	80	8000397	6479037	80.9839	SRR21290022
172	G-Cont-I-59	Control	6710976	558685098	6648271	466533121	99.0656	83.5056	47.3458	70.17	77	6648271	5434451	81.7423	SRR21290020
173	G-Cont-I-60	Control	7980693	653332333	7913491	548485593	99.1579	83.952	47.2662	69.31	76	7913491	6505188	82.2038	SRR21290019
174	G-Cont-I-61	Control	8390847	706001300	8310765	591461853	99.0456	83.7763	47.5622	71.17	80	8310765	6741649	81.1195	SRR21290018
175	G-Cont-I-62	Control	7886198	653526305	7803287	545401446	98.9487	83.4552	47.4504	69.89	77	7803287	6329703	81.1159	SRR21290017
176	G-Cont-I-63	Control	9123879	747010470	9052626	627565670	99.219	84.0103	47.3187	69.32	76	9052626	7420916	81.9753	SRR21290016
177	G-Cont-I-64	Control	5799654	487566267	5751971	411727347	99.1778	84.4454	47.3392	71.58	80	5751971	4734036	82.3028	SRR21290015
178	G-Cont-I-65	Control	7971552	663896564	7895801	555830431	99.0497	83.7224	47.4363	70.4	78	7895801	6388313	80.9077	SRR21290014
179	G-Cont-I-66	Control	9302188	762465725	9210090	638921004	99.0099	83.7967	47.4512	69.37	76	9210090	7524256	81.6958	SRR21290013
180	G-Cont-I-67	Control	8258777	691111668	8181663	580345690	99.0663	83.9728	47.54	70.93	78	8181663	6732180	82.2838	SRR21290012
181	G-Cont-I-68	Control	6792358	565781219	6725968	472416444	99.0226	83.4981	47.3069	70.24	78	6725968	5454861	81.1015	SRR21290011
182	G-Cont-I-69	Control	8691279	722656573	8590241	602012890	98.8375	83.3055	47.2033	70.08	77	8590241	7056421	82.1446	SRR21290009
183	G-Cont-I-70	Control	7416822	616403953	7340112	516147311	98.9657	83.7352	47.2864	70.32	78	7340112	5954922	81.1285	SRR21290007
184	G-Cont-I-71	Control	9588706	783523777	9496499	656022099	99.0384	83.7271	47.2443	69.08	77	9496499	7769307	81.8123	SRR21290006
185	G-Cont-I-72	Control	8177071	680423192	8084492	565430443	98.8678	83.0998	47.1587	69.94	77	8084492	6582926	81.4266	SRR21290005
186	G-Cont-I-73	Control	8618972	720437648	8536894	604923072	99.0477	83.9661	47.3984	70.86	79	8536894	6937796	81.2684	SRR21290004
187	G-Cont-I-74	Control	7940566	657314319	7855772	550806165	98.9321	83.7965	47.1994	70.11	77	7855772	6410310	81.6	SRR21290003
188	G-Cont-I-75	Control	7687619	647548585	7611904	541289807	99.0151	83.5906	47.3453	71.11	79	7611904	6228580	81.8268	SRR21290002
189	G-Cont-I-76	Control	7736008	635020752	7670792	531391809	99.157	83.681	47.5129	69.27	76	7670792	6238689	81.3304	SRR21290001
190	G-Cont-I-77	Control	7216227	602018285	7146793	505796664	99.0378	84.0168	47.2663	70.77	79	7146793	5845717	81.795	SRR21290000
191	G-Cont-I-78	Control	8166772	683880346	8080546	570196843	98.9442	83.3767	47.5934	70.56	79	8080546	6544865	80.9953	SRR21289998
192	G-Cont-I-79	Control	8054582	674599531	7976505	564704623	99.0307	83.7096	47.2798	70.8	79	7976505	6485311	81.3052	SRR21289997
193	G-Cont-I-80	Control	7438471	617875871	7370208	519097365	99.0823	84.0132	47.3836	70.43	78	7370208	6014379	81.6039	SRR21289899
194	G-Cont-I-81	Control	6405158	535073088	6347563	448189212	99.1008	83.7622	47.6372	70.61	79	6347563	5168601	81.4265	SRR21289898
195	G-Cont-I-82	Control	8918414	738050241	8825793	617518925	98.9615	83.669	47.3679	69.97	77	8825793	7190015	81.4659	SRR21289897
196	G-Cont-I-83	Control	6777717	566142162	6715843	475676214	99.0871	84.0206	47.2295	70.83	79	6715843	5444995	81.0769	SRR21289896
197	G-Cont-I-84	Control	6318788	526428007	6265186	443411951	99.1517	84.2303	47.4202	70.77	78	6265186	5103840	81.4635	SRR21289895
198	G-Cont-I-85	Control	7512963	624259849	7414377	516335810	98.6878	82.7117	47.4231	69.64	77	7414377	6016029	81.14	SRR21289894
199	G-Cont-I-86	Control	8569479	721193410	8483294	603575015	98.9943	83.6911	47.5227	71.15	79	8483294	6968508	82.1439	SRR21289893
200	G-Cont-I-87	Control	7870391	656568235	7792568	550371804	99.0112	83.8255	47.5434	70.63	78	7792568	6333361	81.2744	SRR21289891
201	G-Cont-I-88	Control	7034909	586378706	6964887	490453720	99.0046	83.6411	47.545	70.42	79	6964887	5707468	81.9463	SRR21289890
202	G-Cont-I-89	Control	7725645	639800662	7633526	533151859	98.8076	83.3309	47.3555	69.84	77	7633526	6220815	81.4933	SRR21289889
203	G-Cont-I-90	Control	9540816	780282030	9464455	656225497	99.1996	84.1011	47.3701	69.34	76	9464455	7768864	82.0846	SRR21289888
204	G-Cont-I-91	Control	7069549	592974271	6997457	494947875	98.9802	83.4687	47.5153	70.73	78	6997457	5728054	81.8591	SRR21289887
205	G-Cont-I-92	Control	8614526	717593839	8524820	598960217	98.9587	83.4679	47.2388	70.26	77	8524820	7024742	82.4034	SRR21289886
206	G-Cont-I-93	Control	7520634	629583295	7451674	527605203	99.0831	83.8023	47.5007	70.8	78	7451674	6110143	81.9969	SRR21289885
207	G-Cont-I-94	Control	8312814	693798466	8225498	579052890	98.9496	83.4613	47.2056	70.4	78	8225498	6684934	81.2709	SRR21289884
208	G-Cont-I-95	Control	7859023	659115600	7785591	551509518	99.0656	83.6742	47.1997	70.84	79	7785591	6434946	82.652	SRR21289883
209	G-Cont-I-96	Control	8182025	680965444	8086614	565504668	98.8339	83.0445	47.2444	69.93	77	8086614	6648449	82.2155	SRR21289882
210	G-Cont-I-97	Control	9079901	745019016	8999226	624579349	99.1115	83.834	47.5813	69.4	77	8999226	7342812	81.5938	SRR21289880
211	G-Cont-I-98	Control	9073878	752362085	8977081	627108185	98.9332	83.3519	47.5536	69.86	77	8977081	7296728	81.2817	SRR21289879
212	G-Control_I-1	Control	7892577	676842456	7829067	574323301	99.1953	84.8533	46.9868	73.36	82	7829067	6445390	82.3264	SRR21289918
213	G-Control_I-10	Control	9067416	754853029	8986843	640887060	99.1114	84.9022	46.6068	71.31	80	8986843	7443483	82.8264	SRR21289916
214	G-Control_I-100	Control	7481496	643467021	7431797	555823163	99.3357	86.3794	46.8864	74.79	84	7431797	6105346	82.1517	SRR21289915
215	G-Control_I-11	Control	8576943	739900740	8506883	629617878	99.1832	85.0949	46.8613	74.01	83	8506883	7051284	82.8892	SRR21289914
216	G-Control_I-12	Control	6853899	584760387	6807442	499748784	99.3222	85.4621	47.1514	73.41	83	6807442	5597361	82.2241	SRR21289913
217	G-Control_I-13	Control	6516489	554485661	6462099	471196516	99.1653	84.979	46.8842	72.92	82	6462099	5274700	81.6252	SRR21289912
218	G-Control_I-14	Control	8197071	704670454	8122539	597917984	99.0907	84.8507	47.0275	73.61	83	8122539	6685629	82.3096	SRR21289911
219	G-Control_I-15	Control	8366865	719820286	8297872	609487816	99.1754	84.6722	46.8413	73.45	83	8297872	6842236	82.4577	SRR21289910
220	G-Control_I-16	Control	8229543	704284151	8163909	598687843	99.2025	85.0066	46.98	73.33	83	8163909	6780234	83.0513	SRR21289909
221	G-Control_I-17	Control	8495998	736645263	8438661	626527754	99.3251	85.0515	47.1229	74.24	82	8438661	6943569	82.2828	SRR21289908
222	G-Control_I-18	Control	7874351	677088169	7806929	575413814	99.1438	84.9836	47.1751	73.71	83	7806929	6421009	82.2476	SRR21289907
223	G-Control_I-19	Control	7982477	678277903	7917908	577303898	99.1911	85.1132	46.9518	72.91	82	7917908	6523498	82.3892	SRR21289905
224	G-Control_I-20	Control	6209992	531831399	6167427	455175846	99.3146	85.5865	47.2829	73.8	83	6167427	5081549	82.3933	SRR21289904
225	G-Control_I-21	Control	7215167	617283325	7129022	517574786	98.8061	83.8472	47.1275	72.6	81	7129022	5851808	82.0843	SRR21289903
226	G-Control_I-22	Control	8393639	725551592	8322057	615795801	99.1472	84.8728	47.0625	74	83	8322057	6891871	82.8145	SRR21289902
227	G-Control_I-23	Control	8089349	692616243	8020972	589071351	99.1547	85.0502	46.9787	73.44	82	8020972	6581698	82.0561	SRR21289901
228	G-Control_I-24	Control	6989838	597279490	6929476	506890379	99.1364	84.8665	47.1592	73.15	82	6929476	5703179	82.3032	SRR21289861
229	G-Control_I-25	Control	7960482	677298442	7873074	571493527	98.902	84.3784	47.084	72.59	81	7873074	6463339	82.0942	SRR21289860
230	G-Control_I-26	Control	8390863	718269305	8332230	611369284	99.3012	85.117	47.2049	73.37	83	8332230	6840971	82.1025	SRR21289859
231	G-Control_I-27	Control	7756771	666688797	7691038	564888283	99.1526	84.7304	47.1779	73.45	83	7691038	6320641	82.1819	SRR21289858
232	G-Control_I-28	Control	8873815	758351014	8788081	640128467	99.0339	84.4106	46.8912	72.84	82	8788081	7242938	82.4177	SRR21289857
233	G-Control_I-29	Control	7792161	675682743	7735159	574890960	99.2685	85.083	47.2997	74.32	83	7735159	6349356	82.0844	SRR21289855
234	G-Control_I-3	Control	7172622	611599167	7117836	521248045	99.2362	85.2271	47.0821	73.23	82	7117836	5823917	81.8215	SRR21289854
235	G-Control_I-30	Control	8568317	739744302	8488322	627845405	99.0664	84.8733	46.9674	73.97	82	8488322	7017439	82.6717	SRR21289853
236	G-Control_I-31	Control	7727562	662012541	7667006	563215488	99.2164	85.0763	46.995	73.46	83	7667006	6304128	82.2241	SRR21289852
237	G-Control_I-32	Control	7679615	656334044	7597408	553500268	98.9295	84.3321	47.0654	72.85	83	7597408	6149996	80.9486	SRR21289851
238	G-Control_I-33	Control	8751969	734842537	8686135	625628507	99.2478	85.1378	47.1183	72.03	80	8686135	7204828	82.9463	SRR21289850
239	G-Control_I-34	Control	8398986	721500173	8321045	609817417	99.072	84.5208	47.0214	73.29	83	8321045	6852429	82.3506	SRR21289849
240	G-Control_I-35	Control	8463235	726377084	8392023	615010235	99.1586	84.6682	46.8173	73.29	83	8392023	6963506	82.9777	SRR21289848
241	G-Control_I-36	Control	6943910	596972838	6897879	511635949	99.3371	85.7051	47.0266	74.17	83	6897879	5676481	82.2931	SRR21289847
242	G-Control_I-37	Control	8309711	706950336	8218643	595494177	98.9041	84.2342	47.1032	72.46	81	8218643	6779902	82.4942	SRR21289846
243	G-Control_I-38	Control	9467180	796073540	9386052	675914141	99.1431	84.906	47.3105	72.01	80	9386052	7733338	82.3918	SRR21289843
244	G-Control_I-39	Control	5820601	495524712	5776084	420637643	99.2352	84.8873	47.068	72.82	82	5776084	4757544	82.3663	SRR21289842
245	G-Control_I-40	Control	6638235	579874025	6579970	492605301	99.1223	84.9504	47.6171	74.86	85	6579970	5412322	82.2545	SRR21289841
246	G-Control_I-41	Control	6395154	548361768	6334258	464224271	99.0478	84.6566	47.1014	73.29	82	6334258	5199280	82.0819	SRR21289840
247	G-Control_I-42	Control	13548598	1184340832	13426422	1003783683	99.0982	84.7546	46.9963	74.76	84	13426422	11001637	81.9402	SRR21289839
248	G-Control_I-7	Control	7910663	680601848	7848168	575883011	99.21	84.6138	47.0757	73.38	82	7848168	6518963	83.0635	SRR21290008
249	G-Control_I-8	Control	7255976	613466142	7187399	519450583	99.0549	84.6747	46.8993	72.27	81	7187399	5869014	81.657	SRR21289900
250	G-Control_I-99	Control	7764233	677715893	7706483	582758685	99.2562	85.9886	46.5113	75.62	85	7706483	6493143	84.2556	SRR21289878
251	B-Control_II-13	Control	7569049	653925552	7511717	554589239	99.2425	84.8092	46.9112	73.83	83	7511717	6277813	83.5736	SRR21289806
252	B-Control_II-15	Control	5950249	531342839	5909681	451618180	99.3182	84.9956	46.8377	76.42	85	5909681	4938900	83.573	SRR21289805
253	B-Control_II-16	Control	7219061	624365709	7167517	529892912	99.286	84.869	46.8289	73.93	83	7167517	5977276	83.394	SRR21289804
254	B-Control_II-17	Control	9303676	805874102	9214542	680583221	99.0419	84.4528	46.7167	73.86	83	9214542	7700617	83.5703	SRR21289803
255	B-Control_II-18	Control	8586604	736259247	8523319	627485763	99.263	85.2262	46.9499	73.62	82	8523319	7114023	83.4654	SRR21289801
256	B-Control_II-19	Control	7479994	648820734	7398452	543782444	98.9099	83.8109	46.8507	73.5	83	7398452	6166565	83.3494	SRR21289800
257	B-Control_II-20	Control	7548736	643487390	7503988	551923096	99.4072	85.7706	47.0872	73.55	82	7503988	6281802	83.7128	SRR21289799
258	B-Control_II-21	Control	8400529	726978304	8315799	610301488	98.9914	83.9504	46.7193	73.39	82	8315799	6975276	83.8798	SRR21289798
259	B-Control_II-22	Control	9168945	787283343	9106033	669216117	99.3139	85.0032	46.9395	73.49	82	9106033	7614329	83.6185	SRR21289964
260	B-Control_II-23	Control	8225744	710301836	8175954	604981976	99.3947	85.1725	47.0307	74	83	8175954	6815799	83.364	SRR21289963
261	B-Control_II-24	Control	8389864	726663970	8327192	618212683	99.253	85.0755	47.1294	74.24	83	8327192	6948809	83.4472	SRR21289962
262	B-Control_II-25	Control	8074552	698438591	8008103	590959261	99.1771	84.6115	46.8875	73.8	83	8008103	6690361	83.5449	SRR21289961
263	B-Control_II-26	Control	7901065	678853090	7840313	574618879	99.2311	84.6455	47.0739	73.29	82	7840313	6514620	83.0913	SRR21289960

## Sheet: 2. Fluidigm Chip Seq Info
Supplementary Table 2: Summaries of primers used in genotyping chip.
S.No	SNP_NAME	ALLELE	ASP1_NAME	ASP2_NAME	SNP_SEQ	ASP1_SEQ	ASP2_SEQ	LSP_SEQ	STA_SEQ	AMP_GC
1	HDSC00004_1325277_70	GT	G	T	GAACAACCCAGCAGACACCAGTATCCACAGTAGCATCTGTGTCGTGACAACAAGTGAGGTAGTAGATTCA[G/T]AACAACCCCAGCAGACACCAGTATCTACAGTAGCATCTGTGTCATGACAATAAGAGACCCGTGAAGATCC	TGACAACAAGTGAGGTAGTAGATTCAG	GTGACAACAAGTGAGGTAGTAGATTCAT	ACTGGTGTCTGCTGGGGTT	CCACAGTAGCATCTGTGTCGT	0.47
2	HDSC00008_1213611_70	TC	T	C	CGTCACCGTGGTTGAGGCTGTTCCCTTCCCAGCTACAACGACTGCGACGTTGTGGTTCCCTACGGGGACA[T/C]CGCCGACGGCACAGCTGAACGACGTGTCTGTGACTGAGCCACTGATCTTACAGACAGATTCGTCCAGTTT	CTGTGCCGTCGGCGA	TGTGCCGTCGGCGG	CCCAGCTACAACGACTGCGA	GTCACAGACACGTCGTTCAG	0.64
3	HDSC00012_374064_70	CT	C	T	AAGGCCAAGGGAAGGCTGCAGTGTCCAAGCGGAGGGGAAGCTAGTCAGGCTGAAGGAAGACTGCAGTGTC[C/T]GAGGGGAGGCTTGTCGACCAAGGGAAGGCTTTAGTGTCCTAGAGGAGGGGAAGCTGCAGTGTCCGAGAGG	TGAAGGAAGACTGCAGTGTCC	CTGAAGGAAGACTGCAGTGTCT	AAGCCTTCCCTTGGTCGACA	GGGAAGCTAGTCAGGCTGAA	0.58
4	HDSC00019_29516_70	GC	G	C	TTCTTGCATTGACAATTCATATTTACAGGTAACGACAAATGGGTTACTGGAGGAAAAAGAATGTCAAAGA[G/C]TGAGTTTGGTTTTACGCCACTTTGAACAATATTTCCTATATATCTTGGCGTGTCAGCTTGACATTGGGGG	AAGTGGCGTAAAACCAAACTCAC	AAAGTGGCGTAAAACCAAACTCAG	ACGACAAATGGGTTACTGGAGGAA	CTGACACGCCAAGATATATAGGAAAT	0.4
5	HDSC00025_203222_70	GA	G	A	AGCCTGCACGTCAGTCTACACGTCAGCCTGAACAAAGTACTGAACATGCAAATCTTCAAAAAAAGGAAAG[G/A]AAAAGACAAAACAAAAAACAAACTCAAAAAAGCACATCTCCTCCTGAGGTACCTCTTACTAACCCGTTTG	AACATGCAAATCTTCAAAAAAAGGAAAGG	GAACATGCAAATCTTCAAAAAAAGGAAAGA	ACCTCAGGAGGAGATGTGCTTTTT	GTCAGCCTGAACAAAGTACTGA	0.33
6	HDSC00025_203251_70	AC	A	C	GAACAAAGTACTGAACATGCAAATCTTCAAAAAAAGGAAAGGAAAAGACAAAACAAAAAACAAACTCAAA[A/C]AAGCACATCTCCTCCTGAGGTACCTCTTACTAACCCGTTTGGACCTCTGGATATGGAGGTGACCCTGTCT	CCTCAGGAGGAGATGTGCTTT	CCTCAGGAGGAGATGTGCTTG	GGAAAGGAAAAGACAAAACAAAAAACAAACTCA	TCCAAACGGGTTAGTAAGAGGTAC	0.38
7	HDSC00025_203268_70	GA	G	A	TGCAAATCTTCAAAAAAAGGAAAGGAAAAGACAAAACAAAAAACAAACTCAAAAAAGCACATCTCCTCCT[G/A]AGGTACCTCTTACTAACCCGTTTGGACCTCTGGATATGGAGGTGACCCTGTCTTCAGAAGACAGAGGTAA	CTCAAAAAAGCACATCTCCTCCTG	ACTCAAAAAAGCACATCTCCTCCTA	ATCCAGAGGTCCAAACGGGTT	AGGAAAGGAAAAGACAAAACAAAAAACA	0.47
8	HDSC00098_509802_70	GT	G	T	CTGGCCGACGTATTTTACTTTGACTAAAGAGCATCGTCTGGTCAGGTTCGCGTCTTAATGGTGTAGTTCG[G/T]TGCTGATGCTTTCAGTCACTGGATTGTCTGGTTCATAGGTGGAATATTGACTGCAGAAACAGACCGCACC	CAGTGACTGAAAGCATCAGCAC	CAGTGACTGAAAGCATCAGCAA	GTCTGGTCAGGTTCGCGTC	CCACCTATGAACCAGACAATCC	0.51
9	HDSC00111_425512_70	TC	T	C	TGTAGTTGTCAAAGCAATGAACTTTGACCTGAAGAGTGTGATATTCTGGTCAGACAGCAATAATGTGCTC[T/C]GTTGGATAAAAAGCAACAGCTGTTCATTCAAAACATTCGTTGCCAACAGAGTTGGAAAAATACAAGCTGC	AACAGCTGTTGCTTTTTATCCAACA	ACAGCTGTTGCTTTTTATCCAACG	AGTGTGATATTCTGGTCAGACAGCAA	GTTGGCAACGAATGTTTTGAATGA	0.39
10	HDSC00119_201460_70	TC	T	C	TGGAAAAGTGAGATTTGGTGAAATAGGGTTTAAATAGCGGCTTGCATGTATGCGCAGGTACGTGTTTGCG[T/C]GTGTGTTTTTGTTTGTGCTTGTTTGTCCGGAGTAATGCCAATTTTATAAGTACTACCCAACTGAGATACC	CAAACAAGCACAAACAAAAACACACA	AAACAAGCACAAACAAAAACACACG	CGGCTTGCATGTATGCGCAG	AAAATTGGCATTACTCCGGACAA	0.47
11	HDSC00134_294989_70	TC	T	C	TTCATCATTCATGAATTTACTCATGGTTATATAAGTAAATGTTTTATTTTCTTATGTACATTTTTTAACA[T/C]CCTCTATTTTATTTTGTTCATATTTAGTTCTAATCAACTGCGCAGTGTGAATGTCCCTTGGGATAATAAC	GATTAGAACTAAATATGAACAAAATAAAATAGAGGA	GATTAGAACTAAATATGAACAAAATAAAATAGAGGG	CTCATGGTTATATAAGTAAATGTTTTATTTTCTTATGTAC	ATTCACACTGCGCAGTTGATTA	0.21
12	HDSC00136_159491_70	GC	G	C	AGATCTATCCAACTGATGTGGTGCATTGAAGCGTGACATTCGATTCTTGCCTTATTGCTGCAGGCTATGG[G/C]CATGAAATCGACAAGCTGTCATTTTGACAGGTCTATGTGCATCGCCCGAGGCATGTGGGCGGAAGGTATC	AATGACAGCTTGTCGATTTCATGC	AAATGACAGCTTGTCGATTTCATGG	CTTGCCTTATTGCTGCAGGCT	CGATGCACATAGACCTGTCAAA	0.47
13	HDSC00141_152786_70	AG	A	G	CAGTTTGTACATGTCTGCAGCATTGTTGCAGTTGGTAAACAATGATAAGCAGTTTCATTGCTACAGCTCA[A/G]TGCAATATTGCTTGTACTGAGGAGCCTGATTATCCATGGTTAGTACATTGTATTTATATACTTTTTGAAG	GCAGTTTCATTGCTACAGCTCAA	GCAGTTTCATTGCTACAGCTCAG	ATCAGGCTCCTCAGTACAAGCAAT	GCATTGTTGCAGTTGGTAAACA	0.43
14	HDSC00165_516777_70	AG	A	G	TTCTAAAGTCTGTTGATACTGATGGCAGCCTGGCAATATGTTTTATTTCAAACACTGAGGGCATCCAAAC[A/G]ATATCTTATCATGAACACATCTATGCCCCTCTTATTGACCAATCAGATTCCACCTCTCATATCTCATATT	ACACTGAGGGCATCCAAACA	CACTGAGGGCATCCAAACG	TCAATAAGAGGGGCATAGATGTGTTCA	CAGCCTGGCAATATGTTTTATTTCA	0.4
15	HDSC00202_132953_70	CT	C	T	ACTCAGTGCTAACACCACAAGGACCCCTGAGTGCAGGTTGAGCGGAGTGGTAACAGAGTAGGGGAACTGT[C/T]GACCTGGACACTTCTTGGCATTTCTTGCTTTATAGTTTTGTCACATTTCCCCAAACTAACCTGCTGCTTT	GCCAAGAAGTGTCCAGGTCG	GCCAAGAAGTGTCCAGGTCA	CCCTGAGTGCAGGTTGAGC	TGACAAAACTATAAAGCAAGAAATGCC	0.58
16	HDSC00203_355517_70	TC	T	C	CATGATGTTCTGCAGCTCACCTTAATTGTCTCGACTATTTTCAACATTATACTACTACAAGCGCTACAGT[T/C]AAACAATAAATCAATTTAAATAGATAGTATAGTAATGTGGTTCTTATAATATTAAATGTCATAATGAATA	AACATTATACTACTACAAGCGCTACAGTT	ACATTATACTACTACAAGCGCTACAGTC	AACCACATTACTATACTATCTATTTAAATTGATTTATTGT	GCTCACCTTAATTGTCTCGACTATTT	0.25
17	HDSC00206_276272_70	GT	G	T	GGTGCATCTGCAGCTTCTACAACCTAAGACTACTGCATCTTCTTCAACAACTACTTCCACGTCTGCATAA[G/T]TTTGATGATGCGGCTACAACAAATGATGCGTGCTGGGCGACCACCACTACAACTACTACAGCTACCACGA	ACAACTACTTCCACGTCTGCATAAG	ACAACTACTTCCACGTCTGCATAAT	CGCCCAGCACGCATCA	ACCTAAGACTACTGCATCTTCTTCA	0.48
18	HDSC00242_305181_70	CT	C	T	CAAAAAGCTACGCTCTTTCTATCTTTTACTTTAAAAGCACTCAAGGACATATGTTCATATGTCGACCAAC[C/T]AGCACATGTCCGATCTGGCAATAGAATGGCAGACGTCGTCACGTTGCAACAAACATCACTGCTGCAGTAG	GACATATGTTCATATGTCGACCAACC	GGACATATGTTCATATGTCGACCAACT	TGCCAGATCGGACATGTGCT	GCTCTTTCTATCTTTTACTTTAAAAGCACT	0.48
19	HDSC00242_305182_70	AG	A	G	AAAAAGCTACGCTCTTTCTATCTTTTACTTTAAAAGCACTCAAGGACATATGTTCATATGTCGACCAACC[A/G]GCACATGTCCGATCTGGCAATAGAATGGCAGACGTCGTCACGTTGCAACAAACATCACTGCTGCAGTAGC	ACATATGTTCATATGTCGACCAACCA	CATATGTTCATATGTCGACCAACCG	ACGTGACGACGTCTGCCAT	TCTTTTACTTTAAAAGCACTCAAGGACA	0.48
20	HDSC00256_32476_70	AG	A	G	AGCCCTGTCTGCAGATCGTAGACTTCATTCTGTGATCATAGAAACAGTCCTGATCTCTACAGTGTCTGTT[A/G]CACTTCTTATCGCAGTGATGACAGTGAAGACCGTGTTTACAACCTCGAGTAGATACTCCCATACTGTGTG	TGTCATCACTGCGATAAGAAGTGT	GTCATCACTGCGATAAGAAGTGC	AGAAACAGTCCTGATCTCTACAGTGTCT	GAGGTTGTAAACACGGTCTTCAC	0.42
21	HDSC00285_422402_70	AT	A	T	GGCCAGAGTCTGTACCAGTGGGTCCATTGCCTGTACTCGACGTCCCAAGATGTCCCAAATATGCTCCATC[A/T]GGTTCAGGTCACGACTCATGGCAGGCCACGGCAGTGTCGCCATAGCGTCATTCCATTCTGCAGAAAAGCT	AGATGTCCCAAATATGCTCCATCA	AAGATGTCCCAAATATGCTCCATCT	CACTGCCGTGGCCTGC	GCCTGTACTCGACGTCCC	0.55
22	HDSC00307_225568_70	AG	A	G	TGGGTAACTTAAAATCAGTGATGACACCACTTTCTACATGAATATATCATCTGCAGTGTAAAAACGACTT[A/G]CACTGACCCGCCCACTACGTTAACAATATAGGCAACGCCGGAAAATTATATGTCTTGAATATCGACTGAA	GAATATATCATCTGCAGTGTAAAAACGACTTA	AATATATCATCTGCAGTGTAAAAACGACTTG	TTAACGTAGTGGGCGGGTCA	CAGTGATGACACCACTTTCTACATG	0.42
23	HDSC00335_369283_70	GA	G	A	GAGGCTGTACTGCAGGAGATTGCAAAGTCTGCTGACTACCCCTGGTTTTTCATGGCCATTGAGTCAAGCC[G/A]CTCTAAACAGGGCAGAGAGCTGGTGGCAAGCTTGAAGAACCCAGTTGATACCCTGCTTCAGCAGCTCAAG	GCTCTCTGCCCTGTTTAGAGC	GCTCTCTGCCCTGTTTAGAGT	GTCTGCTGACTACCCCTGGTT	TTCAAGCTTGCCACCAGC	0.54
24	HDSC00340_114299_70	GA	G	A	TCTGTTATGAAACGTCTCGGAAACGGACGGGGTTTAACGTCGTATTTCAAGATCGCTCTTTCATAATGAC[G/A]TGCAGGTACATGTGTGTGCATGGATTTATGCTGGTTCCATGAGATATCATGCTGCAGTTTCCATGGATAC	GCACACACATGTACCTGCAC	TGCACACACATGTACCTGCAT	ACGTCGTATTTCAAGATCGCTCTTTCA	CTCATGGAACCAGCATAAATCCA	0.44
25	HDSC00353_273527_70	CT	C	T	TGTATTTCATATTACCTATGGCTCTCGAGATTTGGGTTAGGAATCACTATGTGCCTTACTCTGTTGTTTA[C/T]TGTTTTCCTCATAGAAGTGGGGCTGATGCTGTATTGAACAGTGTCACTTAAATGTCATCTTAATGTGGAA	CACTATGTGCCTTACTCTGTTGTTTAC	TCACTATGTGCCTTACTCTGTTGTTTAT	ACAGCATCAGCCCCACTTCT	CTCTCGAGATTTGGGTTAGGAATC	0.44
26	HDSC00387_431820_70	TA	T	A	ATATCTCAGTACGCTTAACAGTTTCATATTTAACATTCTACCGCAACAAACAATGTCTGCAGAGAACACA[T/A]TCCTAGGTGAGGTCAAAATCAAATGAATGAAAGTTTGTATAGCAATTGATTGTCAGTCTTAAATCCCAAA	CAAACAATGTCTGCAGAGAACACAT	CAAACAATGTCTGCAGAGAACACAA	TCATTCATTTGATTTTGACCTCACCTAGGA	ACAGTTTCATATTTAACATTCTACCGCA	0.38
27	HDSC00532_212711_70	CT	C	T	TGGACGTTTGTGGGGGACAATAGATTGCGCACTCTATGATGGTAAAACTGCGACTTTGAAAGGCGATCTT[C/T]ACTAATGATTATTTGGTAAGAATAGGCTGCACTTTTACACGGGACATTAGTCAGTGCTTTGTTGGACGAT	GCGACTTTGAAAGGCGATCTTC	GCGACTTTGAAAGGCGATCTTT	TCCCGTGTAAAAGTGCAGCCT	GCGCACTCTATGATGGTAAAACT	0.41
28	HDSC00564_161868_70	TG	T	G	AAAGAGGTACATCAGACCACTATGTCGCCGTCTACAGCAATGTAAAAAGGTCAGTGTGTGAAGTAAAATA[T/G]TGAAGAAAAGTCAATGTCTTTTAGAACCTGCAGGTGAAATATTATCTCTATACTATGTATGTTCATTCAT	CAGGTTCTAAAAGACATTGACTTTTCTTCAA	AGGTTCTAAAAGACATTGACTTTTCTTCAC	TGTCGCCGTCTACAGCAATGTAA	GAGATAATATTTCACCTGCAGGTTCT	0.37
29	HDSC00570_307942_70	GA	G	A	TAAGATGGCGGCCTTACAGTATATGAACACATACCACTTGGTCATTCTGAGCGAGTAGGAAACCCCTAAT[G/A]TTTAAAGATGGTACATGTTGTTACCCTGCCTGGCACTCGGCTCTAAGGGACTAAAACAAATTTCTGGTCG	AGCGAGTAGGAAACCCCTAATG	TGAGCGAGTAGGAAACCCCTAATA	GCCAGGCAGGGTAACAACAT	CACATACCACTTGGTCATTCTGA	0.46
30	HDSC00671_350122_70	CA	C	A	TGTACACATAATATGTTATTTAATTAGTATGTGCAATACCAGAACTGTGAAAATTCCTTCTTCTGTGGCA[C/A]CTCTTGTGATTTACACATCCGTGTGCGTTAACACATTTCTTCCCTTTCGAGTTTCTAGTTTCTCTTGATT	TGAAAATTCCTTCTTCTGTGGCAC	GTGAAAATTCCTTCTTCTGTGGCAA	TGTGTTAACGCACACGGATGTGTA	GTATGTGCAATACCAGAACTGTGA	0.42
31	HDSC00769_314495_70	AG	A	G	TAAACACTGCAGTCAGTAATATTCCATTTGTAAGACGGATGTCTGAAATGCCACACCCTGTTGTGGTACA[A/G]TGACGACACACTGTCGACCAAGTGGGACCACCTGATCCAATTTGGTAGTCTGTCTTAGAGACCCTGATAC	CCACACCCTGTTGTGGTACAA	CCACACCCTGTTGTGGTACAG	TCAGGTGGTCCCACTTGGTC	TTGTAAGACGGATGTCTGAAATGC	0.55
32	HDSC00889_85557_70	TC	T	C	AGATTACAGCCTTCATGTGACATCATCTATATCAATCTGCTCATGTCAACACTGAGTTGAAATCTAGTAA[T/C]CATCCCTGAAAAACCTGCAGCTGAGACATATTTGTGTTATTCATTAGAACTAGGAACCACTGAGTACAAA	CTGCAGGTTTTTCAGGGATGA	CTGCAGGTTTTTCAGGGATGG	TCAATCTGCTCATGTCAACACTGAGT	ACAAATATGTCTCAGCTGCAGG	0.4
33	HDSC00947_356361_70	GA	G	A	CAAATGCTTTCCCACACTCACCACACACAAACGACTTGACACCACTGTGACACTTTGAGTGTTTCTGTAG[G/A]TTACCTCGTTGTCTAAACCTTTTCCCACACTCTTTACACTCAAAAGGCTCATCTGTCCTGTGACACATCA	GTGACACTTTGAGTGTTTCTGTAGG	TGTGACACTTTGAGTGTTTCTGTAGA	ACAGATGAGCCTTTTGAGTGTAAAGAGT	ACAAACGACTTGACACCACTG	0.42
34	HDSC01256_190959_70	TA	T	A	CGTACAGGCCGATATACGCCTGGCAGCTTACACCGTATATCCTCTCTGAACACCTCTCTTCCACAGGTGT[T/A]GTGGTGGTGGGTCTGGCTGTCGTTGTTGTAGTCGTTGTTGTGGGAGTGGTTGTCGTAGTTGTGGGTGTAG	CACCTCTCTTCCACAGGTGTT	ACACCTCTCTTCCACAGGTGTA	ACAACGACAGCCAGACCCA	GCAGCTTACACCGTATATCCTCT	0.57
35	HDSC01257_35710_70	TC	T	C	GAACTGGAGCGAGAAGCGTGACTCATCTGTGAACATTGTCTCTGCCCACGATTCCACCGGATGTGACGTG[T/C]GCCCTTTTCTGATAGTCAAGTAGCGGTGGTCGGGCTGCAGGACATCCGCATCGCAAATCTCGGTCTCGAT	GCTACTTGACTATCAGAAAAGGGCA	GCTACTTGACTATCAGAAAAGGGCG	TCTCTGCCCACGATTCCACC	ATGTCCTGCAGCCCGA	0.53
36	HDSC01258_206298_70	AT	A	T	GTATCACTTCTAAATGCCTTTCAAAGACTTGATCCAGAGTATTGTCCTGCAGCATCCGGAATACCACTTA[A/T]CAGGACTTGTCGTCCGGTGAACCAAAAGGGGGTTGGCACCTATATAGATATGTTTTGTTGGGCGTTAAGC	GCAGCATCCGGAATACCACTTAA	GCAGCATCCGGAATACCACTTAT	CCCCTTTTGGTTCACCGGAC	AAGACTTGATCCAGAGTATTGTCCT	0.54
37	HDSC01325_177715_70	CT	C	T	ATTTCTTCATTAAAATTGCAAGATTTATTCCGGAACTAACAAACCTTATAGAACAACAGGATCATAACAT[C/T]GTTTGACAGGTGATCAATGCACGGCAGCATCCGAAAATGAAAGCAAACTGCAGTGTTACTTTTTTAAGGC	GTGCATTGATCACCTGTCAAACG	GTGCATTGATCACCTGTCAAACA	CGGAACTAACAAACCTTATAGAACAACAGG	CATTTTCGGATGCTGCCGT	0.4
38	HDSC01429_170666_70	GT	G	T	CATCCTGGTGTTGTACCCTTGTTCTTGGGTCTGAAAGGCTAATTATTGGATGACTACAGTGAGATTGTGT[G/T]ATGTGTTACAGAGTCCTGCAGGCATGTGAGGACAGCATGCCCATGTATCCTGTGACGGAAGACCCCGAGA	CCTGCAGGACTCTGTAACACATC	CCTGCAGGACTCTGTAACACATA	TGAAAGGCTAATTATTGGATGACTACAGTGA	CATGCTGTCCTCACATGCC	0.42
39	HDSC01478_109029_70	TG	T	G	GCCATAGTAGCTATAGAAGCGTCAGTATGTACAGGCACTGCAGTCACAAATGTAGCTTTAATTTTTTTTT[T/G]TAGGGTTTTGTCCAGCAGTTCCCCTGTCGGTATCAGGACGGTCTGCAGGTCAGAGTGACCGGAAAACCCC	GGAACTGCTGGACAAAACCCTAA	GAACTGCTGGACAAAACCCTAC	TGTACAGGCACTGCAGTCACA	CGTCCTGATACCGACAGGG	0.38
40	HDSC01546_216239_70	GA	G	A	TTAGAGCAGGAGACCATTGCCACCTGATGCGACCACAGCCTCTCACCGTCGTCGCATGCACAGTGTCTGG[G/A]TGGATGCCTAGGGAAGATTGTTACACTCTTCCGTAAGAGTATTGCTGAGTCCCTGTAGAGTAATCGGAAG	ACAATCTTCCCTAGGCATCCAC	GTAACAATCTTCCCTAGGCATCCAT	CCTCTCACCGTCGTCGCAT	AGCAATACTCTTACGGAAGAGTGTA	0.57
41	HDSC01560_89635_70	AG	A	G	GACACGCTGTAGTATGCTGCTGCTGCTGCTGCTGAAGATGCTGATGATGATGGGGTTGACTTGGAGGTGG[A/G]GAACTCCGAAGATGATGATGACAACTGATATGCTTGTTTGGCCGCCAATCTGGAAGAAGATGAATCAGGA	TTGTCATCATCATCTTCGGAGTTCT	TGTCATCATCATCTTCGGAGTTCC	CTGCTGCTGCTGAAGATGCT	CGGCCAAACAAGCATATCAGT	0.49
42	HDSC01629_152028_70	GA	G	A	TTGATTCTGCAGGTCTACTGGGCAGCTGCAGCTCGCTGGGGACAACAGTTGTTGGAGTCAGTGGAGGACC[G/A]GATGACCGACTGCTGCCATCTTCCGGAACTAGCAGACTACTGGAACCTGAGAATGGACTGCAGTCTTGGT	GGCAGCAGTCGGTCATCC	GGCAGCAGTCGGTCATCT	GCTGCAGCTCGCTGGG	GCTAGTTCCGGAAGATGGC	0.62
43	HDSC01633_271905_70	TC	T	C	GATTTCTAACAATACTTACTATCTGCAGTTTGATTGTTTTTCCATCCAATTCTATTGTTCTGATTTTCTA[T/C]AGAGAAAAAAAGGAAACCATGTCTTAAACACACAATCAAAGATTAGCAGATACACATCCAATCCTGCCAG	GTGTTTAAGACATGGTTTCCTTTTTTTCTCTA	TGTTTAAGACATGGTTTCCTTTTTTTCTCTG	TTGTTTTTCCATCCAATTCTATTGTTCTGATTTTCT	GATGTGTATCTGCTAATCTTTGATTGTG	0.29
44	HDSC01634_48285_70	AC	A	C	GTCATTGCAACTGACAGTTAACATGGTGTCCATATTCTTGAGTTCATCATAGTCACTGAAGATGTCTCTC[A/C]ATTAAGGGGGCATGCAGCAGCACTGCAGACACCAATAGTTCCTTTATCTTCAGCATGTTTAGTTCAGTAT	CATCATAGTCACTGAAGATGTCTCTCA	CATCATAGTCACTGAAGATGTCTCTCC	TCTGCAGTGCTGCTGCATG	CATGGTGTCCATATTCTTGAGTTCA	0.48
45	HDSC01673_36489_70	AT	A	T	CAGTCATGTTCATGCGTTTGGATAATAGGTGTATGTAATTTAATTTGTGGCAGATGCTCTCTGTAACTGA[A/T]TTATGTTTTCATCTGTAGCTGAATTGTTATTTGATACTGCAGAGGGAAATTATTCAAAAAGATTCCAAGA	GGCAGATGCTCTCTGTAACTGAA	GGCAGATGCTCTCTGTAACTGAT	CCCTCTGCAGTATCAAATAACAATTCAGC	ATTTAATTTGTGGCAGATGCTCTCT	0.39
46	HDSC01718_73548_70	TC	T	C	AGTGAAGAGTACTTCCTTCATACCAGGGCATGCCAGCGTGGTGTAGAAGGAAAGGTGGTGATGCAGCTTT[T/C]AGACTCTTAATTGGTTTGGTGCTGACAAACCTAGAAAAATAATCAGGGCGAATCTGGCGTCCGAACCCAC	TCAGCACCAAACCAATTAAGAGTCTA	CAGCACCAAACCAATTAAGAGTCTG	GCATGCCAGCGTGGTGTA	CGCCCTGATTATTTTTCTAGGTTTGT	0.48
47	HDSC01789_116445_70	TC	T	C	GTGCGTTTCTGGTAATGATCCCTGTCTCTGAAACACTATCATGACACAACTCCAGACGAAAGGTAGACTG[T/C]TTCTCAGCCACGTTCAATAAACCCTTTCCTTCTCCTTTAAAGACATGTTTCCTGAGCCTGGGGACGTTTG	ACTCCAGACGAAAGGTAGACTGT	CTCCAGACGAAAGGTAGACTGC	TCAGGAAACATGTCTTTAAAGGAGAAGGA	GTCTCTGAAACACTATCATGACACA	0.42
48	HDSC01822_201043_70	AT	A	T	CTCAAACATGCTTCCAAGATGAAGTGTAAACAAAGCAGGTACTTCATCAGGTGCAAGACTCAGCCACCAG[A/T]GTGTGAATTCCAGTAATGATCTATATGAAGGTGGTCACAAAACTTCTGCAGCATGTTAGACAATTAAATT	GCAAGACTCAGCCACCAGA	GCAAGACTCAGCCACCAGT	GTGACCACCTTCATATAGATCATTACTGGA	CAAAGCAGGTACTTCATCAGGT	0.46
49	HDSC01852_176993_70	GA	G	A	TTCAGCTGTCTGCAGTCATATAGCACTGCAGTGTAAACATCTTACCATAGCCAGCAATATCCCAGACAGC[G/A]TTTTTCCGGTCAGTTTTGAAGTGGGCTGTTACCATAAAGACACAAGAGAATTAACAGTGAAACATGTCAT	CCAGCAATATCCCAGACAGCG	CCAGCAATATCCCAGACAGCA	CCCACTTCAAAACTGACCGGA	TGCAGTGTAAACATCTTACCATAGC	0.5
50	HDSC01971_58569_70	CT	C	T	TTTACAACTTTCAACACATCTCGCGGAAAATATATTTCACAAGTCTCCGATCTTCCCGGTGTCAGCTGAC[C/T]ATAAACAACCAATCAACAATAACAAGCTGATTCTTGAAGAAAGAACATCGCGTTCATCAAGCCGGGACAT	CAGCTTGTTATTGTTGATTGGTTGTTTATG	TCAGCTTGTTATTGTTGATTGGTTGTTTATA	CTCCGATCTTCCCGGTGTCA	ACGCGATGTTCTTTCTTCAAGAAT	0.46
51	HDSC02092_84441_70	AT	A	T	TCATGGGTGCAATGTGTGAATCCCATTTCTGGTGTCCCTGCTGTGATATTGCTGAAATATTGCTAAAAGC[A/T]GCATAAAACCATACTCACTCACGCATGTGTCTTTAGGAAAAAAATGTCAGTTTTTGTATTTGCTGCAGAA	TGTGATATTGCTGAAATATTGCTAAAAGCA	TGTGATATTGCTGAAATATTGCTAAAAGCT	ACACATGCGTGAGTGAGTATGGT	CATTTCTGGTGTCCCTGCT	0.37
52	HDSC02139_91871_70	AG	A	G	AGGCCATTGTAGGCAGGTAATTCAGTCGATGGGCACTGCAGACACACACAGTCGGCGGGATTACACAATC[A/G]TTATAACTACAGTTTTCACCCTATCCTAACCCGAATACCCCACCCCATACACAATATCCACCGCCAACAC	TCGGCGGGATTACACAATCA	TCGGCGGGATTACACAATCG	GGTGGGGTATTCGGGTTAGGA	CACTGCAGACACACACAGT	0.45
53	HDSC02175_14875_70	TC	T	C	AGTGGGAAAACTCTCGCTCATGCTCATCTTCAAGCTGAAACAACATCCAAATTCCATGGATTCGAGTCTG[T/C]TCAACAGAGGATTTTCTCTTACTCTGCAGCAGTACTTTGGAACAAACTGCCACCAGATCTCAAGATGTCA	CAAATTCCATGGATTCGAGTCTGT	CAAATTCCATGGATTCGAGTCTGC	GCTGCAGAGTAAGAGAAAATCCTCTGT	CTCATCTTCAAGCTGAAACAACATC	0.43
54	HDSC02225_102679_70	GA	G	A	CATTTGCTTTACGCTTTTTGGGAGGCTTGGCTATTGCTCTGACGACCTGCAGCTCAGTTGGAGACTTCTC[G/A]ATACCCGAATCACCAGGAGTATCCACAGGCTCTGGTTTGGGCATGTTGCTTGGGGTGACGGGCAAGCTGG	GATACTCCTGGTGATTCGGGTATC	GATACTCCTGGTGATTCGGGTATT	GCTCTGACGACCTGCAGC	GCCCAAACCAGAGCCTG	0.54
55	HDSC02251_40036_70	AG	A	G	TGTATCTGAGACCTTGACGCTGCAGTATTTCTGGCTTTGTGTTTTATCTGTTTCATCAATATTATTCAAA[A/G]CTTGAGACAATATTGTTGACACTAATTTCAGCAAGGAAGTGTGTGCATTGTACTGATTGGCAGATCACAC	CTGAAATTAGTGTCAACAATATTGTCTCAAGT	TGAAATTAGTGTCAACAATATTGTCTCAAGC	CGCTGCAGTATTTCTGGCTTTGT	CAATGCACACACTTCCTTGC	0.32
56	HDSC02299_17864_70	GA	G	A	ATAGCCAACATTTTACTAATGAAACGTGTCGTAAGACGAATCTGCAGAGATCTTGTTCCTGGTGCAGATA[G/A]TTAACGTTTTACAAATGAGACGTGACGTGAGACGAATCTGTAGAGATCATGCTCCCAGTGCAGATAGCTA	AGATCTTGTTCCTGGTGCAGATAG	AGATCTTGTTCCTGGTGCAGATAA	TCGTCTCACGTCACGTCTCATTTG	GTCGTAAGACGAATCTGCAGAG	0.42
57	HDSC02449_74126_70	TG	T	G	ATATATAAGTGAAATCATCTTTGGCGCGACGTTAAACCCATTTCACCTCACCTCAACTCATCTCTATGGG[T/G]TTTTTTGCTCGTTTGTTGTCCAACGCCACCTGCAGCTATATTCCAGCTATGTGCGGTCTGTACAAAATCA	CACCTCAACTCATCTCTATGGGT	CACCTCAACTCATCTCTATGGGG	CAGGTGGCGTTGGACAACA	CGCGACGTTAAACCCATTTCA	0.47
58	HDSC02462_13853_70	CT	C	T	TGGTGTTGTCAGTGTTTTTGCGCTCATATGCCAGCAGCTGATCTGTGGCGTCCTGCAGCTTGAACTCTGT[C/T]GTGCGTAGCAGCTCCGGCAACGGTTCTAACTCCTGCAGACGCTGATTCAGACGAAGCTTAACCTGGAGGC	TCCTGCAGCTTGAACTCTGTC	TCCTGCAGCTTGAACTCTGTT	CAGGAGTTAGAACCGTTGCCG	GCAGCTGATCTGTGGCG	0.57
59	HDSC02473_228724_70	TA	T	A	TGACACTGGACATCAGCAACATTTCATATACCAGTGATTATAATTTGGTACAGATTTCAGCCACCACCAT[T/A]ACAGCCCTCCTAGGAACACCGCAACAGTCCTGTTTACATCATGAGAGAAACAGTTCATGTTCAACAGTTC	ACAGATTTCAGCCACCACCATT	ACAGATTTCAGCCACCACCATA	AGGACTGTTGCGGTGTTCCTA	ATCAGCAACATTTCATATACCAGTGATTA	0.53
60	HDSC02784_55154_70	AG	A	G	GTCTGCAGCCATTTTGAAAACCACAAGACTCCCTTCCCAACACAATCACACACACTTTTGGATGGGCGTC[A/G]TATCAACTTTTGAGACTGCAGGGATGCAGCGTTGCGGGAACCGTGTACTACCCGACTACAGCCTGGTTCC	ACACTTTTGGATGGGCGTCA	CACTTTTGGATGGGCGTCG	TTCCCGCAACGCTGCATC	CCTTCCCAACACAATCACACA	0.5
61	HDSC02791_199710_70	TC	T	C	CTGCAGAGAGGCCAAGTCGACGCTTCAAGAGTAAAGCAACTATTGACTTGTGACTGGCTTCATGGACAGG[T/C]TGTTTGGTGAAATTCTACACTCATGAACTAAAGCCAGACTGTTTACAGATCACACTGATGGACTGATGCC	GACTGGCTTCATGGACAGGT	ACTGGCTTCATGGACAGGC	ACAGTCTGGCTTTAGTTCATGAGTGT	AAGCAACTATTGACTTGTGACTGG	0.44
62	HDSC02846_265051_70	AT	A	T	TTCGCTTCCTAATTCAACGACACATAGACATCGTGTGAATAACTGAATAATGACCCCATGGATTGTAGAC[A/T]TTGAACTATTTAGTACACAGACAGTGACGCGATCTGGCCAGCTCCCAGCAACTGCAGTATACACACATCA	AATAATGACCCCATGGATTGTAGACA	AATAATGACCCCATGGATTGTAGACT	GCCAGATCGCGTCACTGTC	CACATAGACATCGTGTGAATAACTGA	0.42
63	HDSC02936_95856_70	TA	T	A	ATGCACAGGCAAATGTTTTTGCTGAAGCAGTTTCTGCAGCTCCCAATTCTTGAAACACAGGGAAAAACTC[T/A]CCAAAACAAAGTGGACCTGAGTAGACATAACCATGAATAACTTCATCCTTGCTAAGGCACGTAACTACTG	ACTCAGGTCCACTTTGTTTTGGA	ACTCAGGTCCACTTTGTTTTGGT	GCAGTTTCTGCAGCTCCCAA	TCATGGTTATGTCTACTCAGGTCC	0.45
64	HDSC02975_1760_70	AG	A	G	AATACAAGATTGCCAGGCTGCCATCAGGACACACAGACTTTAGAAGCTGCAGGTCCTGACTAAACATATC[A/G]TACCACCATGAAAAAACTGCAGCTTGTTGTGACAAATAAATCGACACGTAAATTTACGGCAGGCCATAAG	GCTGCAGTTTTTTCATGGTGGTAT	GCTGCAGTTTTTTCATGGTGGTAC	AGCTGCAGGTCCTGACTAAACA	ACGTGTCGATTTATTTGTCACAACA	0.44
65	HDSC03032_190151_70	AC	A	C	TTGGACTGTGCATGGACTCGTTAGTTCAGCCAAAATGTAACTCTGGAATTCCAGCCTTGTTGCAGGCTCT[A/C]TCGTGTGTTACTGCCTTGGTGTGAGTGGAACACTGACTGTCATGTGGGGTGCTGAGATCACGTCACTCTT	ACCAAGGCAGTAACACACGAT	ACCAAGGCAGTAACACACGAG	CCAGCCTTGTTGCAGGCTC	CCACATGACAGTCAGTGTTCC	0.54
66	HDSC03032_202359_70	TC	T	C	ACAGGTTCTTGGCCCTAACTTCCGGCTGCAGGATGAGTTCCGGTCGGAGGAGGCGTCCCTACGTGACCTG[T/C]TGTCACATCGCCTTGGGATGCCGTCTTACTGGGGCATCACTACATCAGTCATGAACCTTACAAGACTGCA	TCCCAAGGCGATGTGACAA	TCCCAAGGCGATGTGACAG	CTGCAGGATGAGTTCCGGTC	GCCCCAGTAAGACGGCAT	0.61
67	HDSC03059_60956_70	CT	C	T	GGCCAATCTGCAGATAAACGCTGACATAACACAAGATGCCGATATCTGCTAAAGTAATCGCCTAAAAACC[C/T]GAGAGGAAGCTGGATATGTATCTGCAGCCATTATCACCCCATATCTATCATTCTCAGCCCGAGGGAGTAA	CAGATACATATCCAGCTTCCTCTCG	CAGATACATATCCAGCTTCCTCTCA	GCCGATATCTGCTAAAGTAATCGCCT	GGTGATAATGGCTGCAGATACA	0.45
68	HDSC03137_47043_70	TG	T	G	GGAACTTTATCTCACACGGAGTTCGAACTGCAGTAGAAACGAACCTGTATTCATATTTTGATGGAAGGGA[T/G]TTGTTGTATGTGACGTCGCGACCTGTCGGGGCGTAGTCCCAGTCCACTTGCTCTGCCTGAATGTAGAACA	ACCTGTATTCATATTTTGATGGAAGGGAT	CCTGTATTCATATTTTGATGGAAGGGAG	CGACAGGTCGCGACGTCA	GTTCGAACTGCAGTAGAAACGAA	0.44
69	HDSC03158_83855_70	CT	C	T	GTGGTACAATAGCTGCAGAAAGAAAATATAATATATGATTATGAAGATTTGAACTGAAAAAATAGGAAAT[C/T]GTTAACTATGCAATAAAGTCCATTTATAACTTATAACATTTATAAGCCCAGACAGCAAATGGGACTTCTT	TATAAGTTATAAATGGACTTTATTGCATAGTTAACG	TATAAGTTATAAATGGACTTTATTGCATAGTTAACA	AATATATGATTATGAAGATTTGAACTGAAAAAATAGGAAA	GCTGTCTGGGCTTATAAATGTTATAAGT	0.22
70	HDSC03227_33965_70	GA	G	A	CATAATGGGTTCGGATCCCAGATAAGAGCTGATTCTGTTTTTGGTGTGTCAGCCCCATACCCGTGGTCGT[G/A]GGTATTCGAGTGGTAAACGTCGAAGGCCTTTCCTCCAACATCAATCTGCATCTCTCGTCACAAAAGGCGT	CGACGTTTACCACTCGAATACCC	CGACGTTTACCACTCGAATACCT	TGTGTCAGCCCCATACCCG	ATGCAGATTGATGTTGGAGGAAA	0.57
71	HDSC03380_172082_70	CT	C	T	CTGGAAATTATCATCTGCAGTGACTGAAAGGTCATAACAAGTTAACTCTGTTCCAAGCATAGTTGTAGTG[C/T]TCCAGGTACAACTCACCTGTCTGTAGTGTTCCAGGTATTCTTTAGGGTGACACCTCTTCTTCTCCTTCAC	CTGTTCCAAGCATAGTTGTAGTGC	TCTGTTCCAAGCATAGTTGTAGTGT	CCTGGAACACTACAGACAGGTGA	CAGTGACTGAAAGGTCATAACAAGT	0.49
72	HDSC03624_51448_70	GA	G	A	AAATTGTTATGTTCCTAACTTTACCGAGAATCCTAGCAGGAACAAACACAGAAACAAACTGCAGAGCGAA[G/A]TGAAATGACATAGACGCCACGATCATCCGAAACTCGATGACATCTTTGAATAGATCTTCAATCTATTGAA	CAGAAACAAACTGCAGAGCGAAG	CAGAAACAAACTGCAGAGCGAAA	TTCGGATGATCGTGGCGTCT	CCGAGAATCCTAGCAGGAACAA	0.46
73	HDSC03730_65405_70	AG	A	G	AATAGAATAGACACATAAATGAACTTTCAGCTGGAAATGAAGAAGAGTCCTTCTACAAAATGTGACCCTC[A/G]TTGTTATTCTCCCTGCAGACGTTAATTGTATGATAAACAAATCCCACTCGTCTATTCAATATTATGCTCT	TCCTTCTACAAAATGTGACCCTCA	TCCTTCTACAAAATGTGACCCTCG	ACAATTAACGTCTGCAGGGAGAATAACA	CTTTCAGCTGGAAATGAAGAAGAGT	0.4
74	HDSC03802_58405_70	GC	G	C	GACACCATCAAGTCAAGTCTGCTGCGTGACCTCATCCAGTCTGCCCAACTCCAGCATGGCGGCCTCCAGT[G/C]TGACGGGTATTGGTGTCACAGGTTCGAATATGAAGACCTCCACCACACCCATGCCTAGTATTGCGGGCTG	TGTGACACCAATACCCGTCAC	TGTGACACCAATACCCGTCAG	CAGTCTGCCCAACTCCAGC	GTGGAGGTCTTCATATTCGAACC	0.6
75	HDSC03948_82611_70	GT	G	T	GGGCGTGGATGTTACACTGCTGTTGGTTAGTCTGTCTTACAGACCCTGATACAAATATATAGCAAATACA[G/T]CCCATGCAAGTCTTTAATGTTTGGCAAGTCTAGATTACTGCAGTATCAGGAAGAGAGTCACTCGGCTCCT	CAAACATTAAAGACTTGCATGGGC	CCAAACATTAAAGACTTGCATGGGA	TGGTTAGTCTGTCTTACAGACCCTGA	CTGCAGTAATCTAGACTTGCCAA	0.37
76	HDSC03979_60459_70	CA	C	A	TTGGTTTAGTTTGAACTTGTGTTTTTAAATTTCTGCAGTTTCCTTTTGAAGTGGTAAAGTTACTTTTGTC[C/A]ATCAGTTTACATTATTGTATGACATAAAACTGCCTGACCAACTTCATCCAAGCAAAGGATGCTGCAGGGT	CCTTTTGAAGTGGTAAAGTTACTTTTGTCC	CCTTTTGAAGTGGTAAAGTTACTTTTGTCA	GTTGGTCAGGCAGTTTTATGTCATACAA	TGCAGTTTCCTTTTGAAGTGGT	0.35
77	HDSC03979_60460_70	GA	G	A	TGGTTTAGTTTGAACTTGTGTTTTTAAATTTCTGCAGTTTCCTTTTGAAGTGGTAAAGTTACTTTTGTCA[G/A]TCAGTTTACATTATTGTATGACATAAAACTGCCTGACCAACTTCATCCAAGCAAAGGATGCTGCAGGGTT	CCTTTTGAAGTGGTAAAGTTACTTTTGTCAG	CCTTTTGAAGTGGTAAAGTTACTTTTGTCAA	CTTGGATGAAGTTGGTCAGGCA	TCTGCAGTTTCCTTTTGAAGTGG	0.35
78	HDSC04744_59813_70	GT	G	T	TAGAACCACACGACAATGTATAACTGGAAATAATGACATCATGAGGTGGTGTCACTCAAGGATAAACTTT[G/T]GCATTAAACGTTTCTCCTGCAGAAACATGTTTTACACAAGGTCAAATCTGTCTTCTAATAACCATGCAGT	CTGCAGGAGAAACGTTTAATGCC	CTGCAGGAGAAACGTTTAATGCA	ACATCATGAGGTGGTGTCACTCAA	GACCTTGTGTAAAACATGTTTCTGC	0.43
79	HDSC04759_10457_70	AC	A	C	ATGTGTTATCAAAGTGAACGATTTGGTCATGTAATGCTATGTTGTTGTTTTTTCAGAAAGTGTTGCAGTG[A/C]TACACGTTCTTGAAAAACATGTTGTTTTCCTTACTTGTAATAGAATATGTGATCTGCCCATCACTGCCAG	TGTTTTTTCAGAAAGTGTTGCAGTGA	GTTTTTTCAGAAAGTGTTGCAGTGC	AGGAAAACAACATGTTTTTCAAGAACGTGTA	ACGATTTGGTCATGTAATGCTATGTT	0.33
80	HDSC04759_10479_70	TA	T	A	TTGGTCATGTAATGCTATGTTGTTGTTTTTTCAGAAAGTGTTGCAGTGATACACGTTCTTGAAAAACATG[T/A]TGTTTTCCTTACTTGTAATAGAATATGTGATCTGCCCATCACTGCCAGCATCGAGGTCTGTGGCAGCCAC	CAGTGATACACGTTCTTGAAAAACATGT	CAGTGATACACGTTCTTGAAAAACATGA	GCAGTGATGGGCAGATCACAT	GTTGTTGTTTTTTCAGAAAGTGTTGC	0.37
81	HDSC04759_10550_70	AT	A	T	TGTTTTCCTTACTTGTAATAGAATATGTGATCTGCCCATCACTGCCAGCATCGAGGTCTGTGGCAGCCAC[A/T]GTTTCAATTACTGTTCCCACTGCAGTATTCTCTGCAAACTAAAACAACAGGGATCAATCAAAGAAGGTAG	GCAGTGGGAACAGTAATTGAAACT	GCAGTGGGAACAGTAATTGAAACA	CAGCATCGAGGTCTGTGGC	CCCTGTTGTTTTAGTTTGCAGAGA	0.53
82	HDSC04872_50748_70	GA	G	A	GGTATAATTCCACAGACTGGAATAAGAAGAATTTCTTGGGATGTTTTTTACATTAAACCATGACTATCTC[G/A]TTGTTGAGAATGATGTTTAGCATTAAAGAGATTGACTGTCCTCTTGTTGTTTGTTTTCCCTAATGACTGC	TCTCTTTAATGCTAAACATCATTCTCAACAAC	ATCTCTTTAATGCTAAACATCATTCTCAACAAT	CTTGGGATGTTTTTTACATTAAACCATGACTATCT	ACAAACAACAAGAGGACAGTCAAT	0.32
83	HDSC05923_17852_70	CA	C	A	TGTCCTGACGAGTTATTTTTGTAAATCTATGTATCTGCAGCAGTGTTCAAAATGGACATCGGCCCATTGG[C/A]CCGAGACAGACAGATTTTTTCTCGGGCTGATAGTTTTATATTTCAGCAGGCCCTTACGGACTGCAGTTAA	GAGAAAAAATCTGTCTGTCTCGGG	CGAGAAAAAATCTGTCTGTCTCGGT	TGTTCAAAATGGACATCGGCCC	TGCTGAAATATAAAACTATCAGCCCG	0.47
84	HDSC06009_17652_70	GC	G	C	TGTATATCTGTATTACAGTATTGTTCTTACTGGAGTGCTGACTGATGTATTACTGTATGACAGTATTGTT[G/C]TTACTGGAGTCATGACTGACGTATAACTGCATGACAGTATTGCTGTTACTGCGGTGCTGACTGTTGTATA	TTATACGTCAGTCATGACTCCAGTAAC	GTTATACGTCAGTCATGACTCCAGTAAG	CTGGAGTGCTGACTGATGTATTACTGTA	CGCAGTAACAGCAATACTGTCATG	0.4
85	HDSC06030_36013_70	GA	G	A	ACTTTGACGAATTGCAAGGCATCACACATATTTACACCTGTTTGTCCTGTATGCAAGCACCTGCAGCCTG[G/A]CAAGCTCCGCCCCCCTCTCCACATCCTCCTTCCACTCATTCCCTCTCACCTCTGCAGACAACAGTGTCAG	AGCACCTGCAGCCTGG	AAGCACCTGCAGCCTGA	GAGGGAATGAGTGGAAGGAGGA	CACCTGTTTGTCCTGTATGCAA	0.64
86	HDSC06346_10426_70	GT	G	T	CACGTCTTCTGATAATAATACCACGTCGATCTAGTGACAACTTTTCTCAGCTGGACATCTACAACAACTC[G/T]ATACAAACTTATCCTAAGATGACTCAAGAGAAAATCAATGATCTTTGTTTCATCCCTTCCCTAAGGCAAA	AGCTGGACATCTACAACAACTCG	CAGCTGGACATCTACAACAACTCT	TGATTTTCTCTTGAGTCATCTTAGGATAAGTTTGT	GTCGATCTAGTGACAACTTTTCTCA	0.37
87	HDSC06354_37500_70	TA	T	A	GTTATTTAACCATTCTTTGAATATGTATAGGACTTCGAGGCAAGAAGGGATGGTGTGTCGGTTGTCCATG[T/A]GAATCGTGTCAACAAGGAGATTGTTTTGAAGAAAACTGCCGGAACTAAAGGTAGTATGCGTCATCTATAG	GGTGTGTCGGTTGTCCATGT	GGTGTGTCGGTTGTCCATGA	CGGCAGTTTTCTTCAAAACAATCTCCT	ACTTCGAGGCAAGAAGGGAT	0.46
88	HDSC07879_28187_70	GA	G	A	CCAGGGTGATGACCTGCAGGCACGTCCTGTGAAGAGTTGGAGCACAGGACGAGCAGATCATCACATCACA[G/A]TCAACGCACAGAAAGTCCAAAGACTTGCCTGGGTGCTTGTAGCAGAGTCTCCCCTGCACGGTGGGTATAG	ACGAGCAGATCATCACATCACAG	ACGAGCAGATCATCACATCACAA	GCACCCAGGCAAGTCTTTGG	CCTGTGAAGAGTTGGAGCAC	0.51
89	HDSC10157_5121_70	TC	T	C	GTACGCTTCCTGGGAGAAGTCCCATTCGCTGTCTGGGCTGCGTGTAGAGGGGGCAAGGACCCTGAGCTGA[T/C]GAAGTTTAATAGTGACAGGCGTCGCAAGTACGCGGTATGACGAGGGTCTTGTTGTACCCACATGACCTGT	CGACGCCTGTCACTATTAAACTTCA	GACGCCTGTCACTATTAAACTTCG	GGGCAAGGACCCTGAGC	CCTCGTCATACCGCGTACTT	0.53
90	HDSC10266_13004_70	CA	C	A	GTGACGCATGTGTAATACAAGATCATATCTTTAATGGTCATTTCAAAGATGTAAATATTCTCCACCAAAA[C/A]GAAACGCAAATGTGTTCACCGCAGTTGACACTACTTCCTGATGTACACGCAGTCGCACTGGTCTGTAGAA	CGGTGAACACATTTGCGTTTCG	CGGTGAACACATTTGCGTTTCT	GGTCATTTCAAAGATGTAAATATTCTCCACCAA	CATCAGGAAGTAGTGTCAACTGC	0.39
91	HDSC12734_14717_70	AT	A	T	CCCCCACCTACTGCAGTTCCGGACACATTTGACTCAACAAACACACCTTACTACTCCTGGCTAAACCCCC[A/T]TAATTGCAGTTCGAGACACATTTCACATGAACAACACTCACTTACTCCTGGCTAAACCCCTAACTACTGC	CTCCTGGCTAAACCCCCA	CTCCTGGCTAAACCCCCT	CATGTGAAATGTGTCTCGAACTGCAA	TTTGACTCAACAAACACACCTTACT	0.47
92	HDSC17996_7985_70	CA	C	A	CACTATTTGTAGGTAACCACTGTCTGTAGGCTACAATACTCTTTAGGCAACCACACTATGTAGGCTACCA[C/A]TATCTGTTTGCAACCATACTCAGTATGCAACCACTGTCTGTAGGTTACAATACTCTGTAGGCAACCACTC	AACCACACTATGTAGGCTACCAC	CAACCACACTATGTAGGCTACCAA	GCATACTGAGTATGGTTGCAAACAGAT	TGTAGGCTACAATACTCTTTAGGCA	0.43
93	HDSC20079_15902_70	AG	A	G	TGGCGCTATGTATGTGTACCGAACACATGAGTGTTTTATATGTAGCCCATTTTAGATGTTTAATTAGGAT[A/G]AAAAGTCACCAAGATTATTCCATTTTTCCTGCTGCAGAATCTATCCCCGAGGGACGGACCATTGTGTATC	AGGAAAAATGGAATAATCTTGGTGACTTTTT	AGGAAAAATGGAATAATCTTGGTGACTTTTC	CGAACACATGAGTGTTTTATATGTAGCCC	GGGATAGATTCTGCAGCAGG	0.3
94	HDSC25358_3943_70	CT	C	T	TGATCATAGTCTAATCTTAATATGTAGGTTAATCTATCTCTTAGCATATGGAATTACTTGACACACTAAA[C/T]GGAGACTGGTTACTGTTCTTCAACAGTAATGGAGACTGTCAGACTCTTTGACTCACTAACTGCAGGTCTA	TTGAAGAACAGTAACCAGTCTCCG	GTTGAAGAACAGTAACCAGTCTCCA	CTATCTCTTAGCATATGGAATTACTTGACACACT	AGTCTGACAGTCTCCATTACTGTT	0.38
95	HDSC50991_647_70	TC	T	C	CCGCCAGGAGTGGGGAGGACTTGAAGAAGGTCTCCGAGATGATCTACAAGAAGTGCCTCGGAGACCGAGA[T/C]TTTGCCAAGTCAGGGGCCAGCATTTGTCACCATATGGCTGGGATTGAAGTAGAAGGAACCAAGTTTAGGA	GCCCCTGACTTGGCAAAA	GCCCCTGACTTGGCAAAG	ACAAGAAGTGCCTCGGAGACC	CAATCCCAGCCATATGGTGAC	0.56
96	HDSC54688_233_70	GT	G	T	TTTGTTTGAAATTCTGGTTGACTCTGCACTTTCTTTCTGGATTTACCAACAGCATCACTATCTTTTGTTT[G/T]AAATTCTGGTTGACTCTGCACTTTCTTTCTGGATTTACCAACGGCATCACTGCTTTCATGCGTTTCTGAC	AAAGTGCAGAGTCAACCAGAATTTC	GAAAGTGCAGAGTCAACCAGAATTTA	TCTGGATTTACCAACAGCATCACTATCTT	CCGTTGGTAAATCCAGAAAGAAAG	0.37

## Sheet: 3. SNPcalling summaries
Supplementary Table 3: Summaries of SNP allele with reference allele.
S.No	sampleID	dataset	model	phenotype	predict	HDSC00004_1325277_70	HDSC00008_1213611_70	HDSC00012_374064_70	HDSC00019_29516_70	HDSC00025_203222_70	HDSC00025_203251_70	HDSC00025_203268_70	HDSC00098_509802_70	HDSC00111_425512_70	HDSC00119_201460_70	HDSC00134_294989_70	HDSC00136_159491_70	HDSC00141_152786_70	HDSC00165_516777_70	HDSC00202_132953_70	HDSC00203_355517_70	HDSC00206_276272_70	HDSC00242_305181_70	HDSC00242_305182_70	HDSC00256_32476_70	HDSC00285_422402_70	HDSC00307_225568_70	HDSC00335_369283_70	HDSC00340_114299_70	HDSC00353_273527_70	HDSC00387_431820_70	HDSC00532_212711_70	HDSC00564_161868_70	HDSC00570_307942_70	HDSC00671_350122_70	HDSC00769_314495_70	HDSC00889_85557_70	HDSC00947_356361_70	HDSC01256_190959_70	HDSC01257_35710_70	HDSC01258_206298_70	HDSC01325_177715_70	HDSC01429_170666_70	HDSC01478_109029_70	HDSC01546_216239_70	HDSC01560_89635_70	HDSC01629_152028_70	HDSC01633_271905_70	HDSC01634_48285_70
1	B-control_II-13	2017_GBS	train set	control	control	G:T	T:T	C:C	G:G	G:G	No Call	No Call	G:G	T:T	T:T	T:T	G:G	A:A	A:A	C:C	No Call	G:G	C:C	A:A	A:A	A:A	A:A	G:G	G:G	C:C	T:A	C:C	T:T	G:G	C:C	A:A	C:T	G:G	T:A	T:T	T:A	No Call	G:G	T:G	G:G	A:G	G:G	T:T	A:C
2	B-control_II-15	2017_GBS	train set	control	control	G:G	T:T	C:C	G:G	G:A	A:C	G:A	G:G	T:T	T:T	T:T	G:G	A:A	A:A	C:C	No Call	G:G	T:T	G:G	No Call	A:A	A:A	G:G	G:G	T:C	T:T	C:C	T:T	G:A	C:C	A:A	C:T	G:G	T:T	T:T	T:A	C:C	G:T	T:G	A:G	A:A	G:G	T:T	A:C
3	B-control_II-16	2017_GBS	train set	control	control	G:G	T:T	C:C	G:G	G:G	A:A	G:G	G:G	T:T	T:T	T:T	G:C	A:A	A:A	C:C	T:T	G:G	T:T	G:G	A:A	A:A	G:G	G:G	G:G	C:C	T:T	C:C	T:T	G:A	C:C	A:A	C:C	G:G	T:A	T:T	T:A	T:T	G:G	T:G	G:G	A:G	G:G	T:T	A:A
4	B-control_II-17	2017_GBS	train set	control	control	G:G	T:T	C:C	G:C	G:G	A:A	G:G	G:G	T:T	T:T	T:T	G:G	A:A	G:A	C:C	T:T	G:G	T:T	G:G	A:A	A:A	A:A	G:G	G:G	T:T	T:T	C:C	T:T	G:G	C:C	A:G	C:T	G:G	T:A	T:T	A:A	C:C	G:G	T:G	G:G	A:G	G:G	T:T	A:C
5	B-control_II-18	2017_GBS	train set	control	control	G:G	T:T	C:C	G:G	G:G	A:A	G:G	G:G	T:T	T:T	T:T	G:G	A:A	G:A	C:C	T:T	G:G	C:T	A:G	A:A	A:A	A:G	G:G	G:G	T:C	T:T	C:C	T:T	G:G	A:A	A:G	C:C	G:A	T:A	T:T	T:A	T:C	G:G	T:T	G:G	A:A	G:G	T:T	A:A
6	B-control_II-19	2017_GBS	train set	control	control	G:G	T:T	C:C	G:G	G:G	A:A	G:G	G:G	T:T	T:T	T:T	G:G	A:A	A:A	C:T	T:C	G:T	C:T	A:G	A:A	A:A	A:A	G:A	G:G	T:C	A:A	C:C	T:T	G:G	C:A	A:A	C:T	G:A	T:A	T:T	T:T	T:T	G:G	T:G	G:G	A:G	G:A	T:T	A:A
7	B-control_II-20	2017_GBS	train set	control	control	G:G	T:T	C:C	G:G	G:G	A:C	G:G	G:G	T:T	T:T	T:T	G:G	A:A	G:A	C:C	T:T	G:G	C:T	A:G	A:A	A:A	A:A	G:G	G:G	T:T	T:T	C:C	T:T	G:G	C:C	A:G	C:T	G:G	T:A	T:T	A:A	C:C	G:G	T:G	G:G	G:G	G:G	T:T	A:C
8	B-control_II-21	2017_GBS	train set	control	control	G:T	T:T	C:C	G:G	G:G	A:A	G:G	G:G	T:T	T:T	T:T	G:C	A:A	A:A	C:C	T:T	G:G	C:T	A:G	A:A	A:A	A:G	G:G	G:G	T:C	T:T	C:C	T:T	G:A	C:C	A:A	C:C	G:G	A:A	T:T	T:A	T:T	G:G	G:G	A:G	A:G	G:G	T:T	A:A
9	B-control_II-22	2017_GBS	train set	control	control	G:T	T:T	C:C	G:G	G:G	A:A	G:G	G:G	T:T	T:T	T:T	G:G	A:A	G:A	C:T	T:T	G:G	C:T	A:G	No Call	A:A	A:G	G:G	G:G	C:C	T:T	C:C	T:T	G:G	C:A	A:A	C:C	G:G	T:A	T:T	A:A	T:T	G:G	T:G	G:G	A:G	G:G	T:T	A:C
10	B-control_II-23	2017_GBS	train set	control	control	G:G	T:T	C:C	G:C	G:G	A:A	G:G	G:G	T:T	T:T	T:T	G:G	A:A	A:A	C:C	T:T	G:G	C:T	A:G	A:A	A:A	A:G	G:G	G:G	C:C	T:T	C:C	T:T	G:G	C:A	A:A	C:T	G:G	T:A	T:T	A:A	C:C	G:G	T:G	G:G	A:A	G:G	T:T	A:A
11	B-control_II-24	2017_GBS	train set	control	control	G:G	T:T	C:C	G:G	G:G	A:A	G:G	G:G	T:T	T:T	T:T	G:G	A:A	G:A	C:C	T:T	G:G	C:T	A:G	A:A	A:A	A:A	G:G	G:G	No Call	T:T	C:C	T:T	G:G	C:C	A:G	C:T	G:A	A:A	T:T	A:A	C:C	G:G	T:G	A:G	A:A	G:G	T:T	A:A
12	B-control_II-25	2017_GBS	train set	control	control	G:G	T:T	C:C	G:G	G:A	A:C	G:A	G:G	T:T	T:T	T:T	G:C	A:A	A:A	C:C	T:T	G:T	C:C	A:A	A:A	A:A	A:A	G:A	G:G	T:C	T:A	C:C	T:T	G:A	C:A	A:A	C:T	G:A	T:T	T:T	T:A	T:T	G:G	G:G	A:G	A:G	G:A	T:T	A:A
13	B-control_II-26	2017_GBS	train set	control	control	G:G	T:T	C:C	G:G	G:A	A:C	G:A	G:G	T:T	T:T	T:T	G:G	A:A	G:A	C:T	T:T	G:G	T:T	G:G	A:A	A:A	G:G	G:G	G:G	T:C	T:T	C:C	T:T	G:G	C:C	A:A	C:T	G:G	T:A	T:T	T:A	C:C	G:G	T:G	A:G	A:A	G:A	T:T	A:C
14	B-case_II-1	2017_GBS	train set	case	case	G:G	T:T	C:C	G:G	G:A	A:C	G:A	G:G	T:T	T:C	T:T	G:C	A:A	A:A	C:T	T:T	G:T	C:C	A:A	A:A	A:A	A:A	G:A	G:G	T:C	A:A	C:C	T:T	G:A	C:A	A:A	C:C	G:A	T:T	T:T	T:T	T:T	G:G	T:G	G:G	A:G	G:A	T:T	A:A
15	B-case_II-10	2017_GBS	train set	case	case	G:G	T:T	C:C	G:C	G:A	A:C	G:A	G:G	T:T	T:T	T:T	G:G	A:A	A:A	C:C	T:T	G:G	C:T	A:G	A:A	A:A	A:G	G:G	G:G	C:C	T:T	C:C	T:T	G:A	C:C	A:A	C:C	G:G	T:A	T:T	T:A	T:C	G:G	T:G	No Call	A:A	G:G	T:T	A:C
16	B-case_II-11	2017_GBS	train set	case	case	G:G	T:T	C:C	G:G	G:A	A:C	G:A	G:G	T:T	T:C	T:T	G:G	A:A	A:A	C:T	T:C	G:T	C:T	A:G	A:A	A:A	A:A	G:A	G:G	T:C	T:A	C:C	T:T	G:A	C:A	A:A	C:C	G:A	T:T	T:T	T:T	T:T	G:G	G:G	G:G	A:G	G:A	T:T	A:A
17	B-case_II-12	2017_GBS	train set	case	case	G:G	T:T	C:C	G:G	G:G	A:A	G:G	G:G	T:T	T:T	T:T	G:C	A:A	G:A	C:C	T:T	G:G	C:C	A:A	A:A	A:A	A:G	G:G	G:A	T:C	T:A	C:C	T:T	G:A	C:A	A:G	C:T	G:A	T:T	T:T	T:T	T:C	G:G	T:G	G:G	A:G	G:G	T:T	A:C
18	B-case_II-13	2017_GBS	train set	case	case	G:G	T:T	C:C	G:G	G:A	A:C	G:A	G:G	T:T	T:C	T:T	G:G	A:A	G:A	C:T	T:C	G:T	T:T	G:G	A:A	A:A	A:G	G:A	G:G	T:T	A:A	C:C	T:T	G:A	A:A	A:G	C:C	G:A	T:A	T:T	T:T	T:T	G:G	T:G	G:G	A:G	G:A	T:T	A:A
19	B-case_II-14	2017_GBS	train set	case	case	G:G	T:T	C:C	G:C	G:A	A:C	G:A	G:G	T:C	T:T	T:T	G:C	A:A	A:A	C:T	T:C	G:T	C:T	A:G	A:A	A:A	A:A	G:A	G:G	T:C	A:A	C:C	T:T	G:A	C:A	A:A	C:C	G:A	T:T	T:T	T:T	T:T	G:G	T:G	G:G	G:G	G:A	T:T	A:A
20	B-case_II-15	2017_GBS	train set	case	case	G:G	T:T	C:C	G:G	G:A	A:C	G:A	G:G	T:T	T:T	T:T	C:C	A:A	A:A	C:T	T:T	G:G	C:C	A:A	A:A	A:A	A:A	G:G	G:G	T:T	T:A	C:C	T:T	G:G	A:A	A:G	C:T	A:A	T:A	T:T	T:T	T:C	G:G	T:G	G:G	A:G	G:G	T:T	A:A
21	B-case_II-16	2017_GBS	train set	case	case	G:G	T:T	C:C	G:C	G:A	A:C	G:A	G:G	T:C	T:C	T:T	C:C	A:A	A:A	C:T	T:C	G:T	C:C	A:A	A:A	A:A	A:A	G:A	G:G	T:C	A:A	C:C	T:T	G:G	C:A	A:A	C:C	G:A	T:A	T:T	T:T	T:T	G:G	G:G	A:G	A:G	G:A	T:T	A:A
22	B-case_II-17	2017_GBS	train set	case	case	G:G	T:T	C:C	G:G	G:A	A:C	G:A	G:G	T:T	T:C	T:T	G:G	A:A	A:A	C:T	T:T	G:G	C:T	A:G	A:A	A:A	A:G	G:G	G:A	T:T	T:A	C:C	T:T	G:A	C:A	A:A	C:T	G:G	A:A	T:T	T:A	C:C	G:G	T:G	G:G	A:G	G:A	T:T	A:C
23	B-case_II-18	2017_GBS	train set	case	case	G:G	T:T	C:C	G:G	G:G	A:A	G:G	G:G	T:T	T:T	T:T	G:G	A:A	A:A	C:C	T:T	G:G	C:T	A:G	A:A	A:A	A:G	G:G	G:G	T:T	T:T	C:C	T:T	G:G	C:A	A:G	C:C	G:A	T:A	T:T	A:A	T:C	G:G	T:G	G:G	A:A	G:G	T:T	A:A
24	B-case_II-19	2017_GBS	train set	case	case	G:G	T:T	C:C	G:G	G:G	A:A	G:G	G:G	T:T	T:C	T:T	G:G	A:A	A:A	T:T	T:C	G:T	C:T	A:G	A:A	A:A	A:A	G:A	G:G	T:T	A:A	C:C	T:T	G:G	C:A	A:A	T:T	G:A	A:A	T:T	T:A	C:C	G:G	G:G	A:A	A:G	A:A	T:T	A:C
25	B-case_II-2	2017_GBS	train set	case	case	G:G	T:T	C:C	G:G	G:G	A:A	G:G	G:G	T:T	T:C	T:T	G:G	A:A	A:A	C:T	T:C	G:T	C:C	A:A	A:A	A:A	A:G	G:A	G:G	T:T	T:A	C:C	T:T	G:G	C:A	A:G	C:T	G:A	T:A	T:T	T:T	T:C	G:G	T:G	G:G	A:G	G:A	T:T	A:A
26	B-case_II-20	2017_GBS	train set	case	case	G:G	T:T	C:C	G:G	G:G	A:A	G:G	G:G	T:C	T:T	T:T	G:G	A:A	A:A	C:C	T:T	G:G	C:T	A:G	A:A	A:A	A:G	G:G	G:A	T:C	T:A	C:C	T:T	G:G	C:C	A:G	T:T	G:A	T:A	No Call	T:A	C:C	G:G	T:T	A:G	A:A	G:A	T:T	A:C
27	B-case_II-21	2017_GBS	train set	case	case	G:G	T:T	C:C	G:G	G:G	A:A	G:G	G:G	T:C	T:C	T:T	G:C	A:A	A:A	T:T	T:C	G:T	C:T	A:G	A:A	A:A	A:A	G:A	G:G	T:T	T:A	C:C	T:T	G:G	C:C	A:A	C:T	G:A	T:A	T:T	T:T	C:C	G:G	T:G	A:G	G:G	A:A	T:T	A:C
28	B-case_II-22	2017_GBS	train set	case	case	G:G	T:T	C:C	G:G	G:G	A:A	G:G	G:G	T:T	T:C	T:T	G:G	A:A	A:A	C:C	T:T	G:G	C:T	A:G	A:A	A:A	A:G	G:G	G:G	C:C	T:A	C:C	T:T	G:A	C:C	A:A	C:T	G:G	T:A	T:T	T:A	T:C	G:G	G:G	A:A	A:G	G:G	T:T	A:A
29	B-case_II-23	2017_GBS	train set	case	case	G:G	T:T	C:C	G:G	G:A	A:C	G:A	G:G	T:T	T:C	T:T	G:G	A:A	A:A	C:T	T:T	G:G	C:T	A:G	A:A	A:A	A:A	G:G	G:G	T:T	T:T	C:C	T:T	G:A	C:A	A:A	C:T	G:G	T:A	T:T	A:A	T:C	G:G	T:G	G:G	A:G	G:G	T:T	A:C
30	B-case_II-24	2017_GBS	train set	case	case	G:G	T:T	C:C	G:C	G:G	A:A	G:G	G:G	T:T	T:C	T:T	G:G	A:A	A:A	C:C	T:T	G:G	C:T	A:G	A:A	A:A	A:A	G:G	G:G	C:C	T:A	C:C	T:T	G:A	C:C	A:A	C:C	G:G	T:A	T:T	T:A	T:C	G:G	T:G	G:G	A:A	G:G	T:T	A:C
31	B-case_II-25	2017_GBS	train set	case	case	G:G	T:T	C:C	G:G	G:A	A:C	G:A	G:G	T:C	T:T	T:T	G:C	A:A	G:A	C:C	T:C	G:T	C:T	A:G	A:A	A:A	A:G	G:A	G:G	T:T	T:A	C:C	T:T	G:A	A:A	A:A	C:T	G:A	T:A	T:T	T:T	T:C	G:G	T:G	G:G	A:G	G:A	T:T	A:A
32	B-case_II-26	2017_GBS	train set	case	case	G:G	T:T	C:C	G:G	G:G	A:A	G:G	G:G	T:T	T:T	T:T	G:G	A:A	G:A	C:C	T:T	G:G	T:T	G:G	A:A	A:A	A:G	G:G	G:G	T:C	T:A	C:C	T:T	G:G	A:A	A:A	C:T	G:G	T:A	T:T	T:A	C:C	G:G	T:T	G:G	A:G	G:G	T:T	A:A
33	B-case_II-27	2017_GBS	train set	case	case	G:G	T:T	C:C	G:C	G:G	No Call	G:G	G:G	T:T	T:T	T:T	G:G	A:A	A:A	C:C	T:T	G:G	C:T	A:G	A:A	A:A	A:G	G:G	G:G	C:C	T:A	C:C	T:T	G:G	C:C	A:A	C:C	G:G	T:A	T:T	T:A	T:T	G:G	T:T	G:G	A:G	G:G	T:T	A:A
34	B-case_II-28	2017_GBS	train set	case	case	G:G	T:T	C:C	G:G	A:A	C:C	A:A	G:G	T:T	C:C	T:T	G:C	A:A	A:A	C:C	T:T	G:G	C:T	A:G	A:A	A:A	A:G	G:G	G:G	T:C	T:T	C:C	T:T	G:A	C:A	A:A	C:C	G:G	A:A	T:T	T:A	T:C	G:G	T:G	A:A	G:G	G:G	T:T	A:C
35	B-case_II-29	2017_GBS	train set	case	case	G:G	T:T	C:C	G:C	G:G	A:A	G:G	G:G	T:T	T:T	T:T	G:C	A:A	A:A	C:T	C:C	G:T	C:T	A:G	A:A	A:A	A:G	G:A	G:G	T:C	T:A	C:C	T:T	G:A	C:A	A:A	T:T	G:A	T:T	T:T	T:T	C:C	G:G	G:G	G:G	A:G	G:A	T:T	A:A
36	B-case_II-3	2017_GBS	train set	case	case	G:T	T:T	C:C	G:G	G:G	A:A	G:G	G:G	T:C	T:C	T:T	G:C	A:A	A:A	C:T	T:C	G:T	C:T	A:G	A:A	A:A	A:G	G:A	G:G	T:T	A:A	C:C	T:T	G:A	C:A	A:A	C:C	G:A	T:T	T:T	T:A	T:T	G:G	T:G	G:G	G:G	G:A	T:T	A:A
37	B-case_II-30	2017_GBS	train set	case	case	G:G	T:T	C:C	G:C	G:A	A:C	G:A	G:G	T:C	T:C	T:T	G:C	A:A	A:A	C:C	T:T	G:G	C:T	A:G	A:A	A:A	A:A	G:G	G:G	C:C	T:A	C:C	T:T	G:G	C:C	A:A	C:T	G:G	T:A	T:T	T:A	C:C	G:G	G:G	G:G	A:G	G:G	T:T	A:C
38	B-case_II-31	2017_GBS	train set	case	case	G:G	T:T	C:C	G:C	G:G	A:A	G:G	G:G	T:T	T:T	T:T	G:C	A:A	A:A	C:C	T:T	G:G	C:T	A:G	A:A	A:A	A:G	G:G	G:G	T:C	T:T	C:C	T:T	G:A	C:A	A:A	C:T	G:A	A:A	T:T	T:A	T:C	G:G	T:G	A:G	A:G	G:G	T:T	A:C
39	B-case_II-32	2017_GBS	train set	case	case	G:G	T:T	C:C	G:G	G:G	A:A	G:G	G:G	T:T	T:T	T:T	G:C	A:A	A:A	C:C	T:T	G:G	C:T	A:G	A:A	A:A	A:A	G:G	G:G	T:C	T:T	C:C	T:T	G:A	C:A	A:A	C:C	G:G	A:A	T:T	T:A	T:C	G:G	G:G	G:G	G:G	G:G	T:T	A:C
40	B-case_II-33	2017_GBS	train set	case	case	G:G	T:T	C:C	G:C	G:A	A:C	A:A	G:G	T:T	T:C	T:C	G:C	A:A	G:A	C:C	T:T	G:G	C:T	A:G	A:A	A:A	A:A	G:G	G:G	T:C	T:A	C:T	T:T	G:G	C:A	A:A	T:T	G:G	T:A	T:T	T:A	C:C	G:G	T:T	G:G	A:G	G:G	T:T	A:A
41	B-case_II-34	2017_GBS	train set	case	case	G:G	T:T	C:C	G:G	G:G	A:A	G:G	G:G	T:C	T:T	T:T	G:C	A:A	A:A	C:C	T:T	G:G	C:T	A:G	A:A	A:A	A:A	G:G	G:G	T:C	T:A	C:C	T:T	G:A	C:A	A:A	C:T	G:G	T:A	T:T	T:A	C:C	G:G	T:G	G:G	A:G	G:G	T:T	A:A
42	B-case_II-35	2017_GBS	train set	case	case	G:G	T:T	C:C	G:C	G:A	A:C	G:A	G:G	T:T	T:C	T:T	G:G	A:A	A:A	C:C	T:T	G:G	C:T	A:G	A:A	A:A	A:A	G:G	G:G	C:C	T:T	C:C	T:T	G:A	C:C	A:A	C:T	G:G	T:A	T:T	T:A	T:C	G:G	T:G	A:G	A:G	G:G	T:T	A:A
43	B-case_II-36	2017_GBS	train set	case	case	G:G	T:T	C:C	G:G	G:G	A:C	G:A	G:G	T:T	T:T	T:T	G:G	A:A	G:A	C:C	T:T	G:G	T:T	G:G	A:A	A:A	A:A	G:G	G:G	T:T	T:T	C:C	T:T	G:A	C:C	A:A	C:T	G:A	T:A	T:T	T:A	C:C	G:G	T:G	G:G	A:A	G:G	T:T	A:C
44	B-case_II-37	2017_GBS	train set	case	case	G:G	T:T	C:C	G:G	G:G	A:A	G:G	G:G	T:T	T:C	T:T	G:G	A:A	A:A	C:T	T:C	G:T	C:T	A:G	A:A	A:A	A:A	G:A	G:G	T:C	T:A	C:C	T:T	G:A	C:A	A:A	T:T	G:A	T:T	T:T	T:T	C:C	G:G	G:G	G:G	A:G	G:A	T:T	A:A
45	B-case_II-38	2017_GBS	train set	case	case	G:T	T:T	C:C	G:G	G:A	A:C	G:A	G:G	T:T	T:T	T:T	G:C	A:A	A:A	T:T	T:T	G:T	T:T	G:G	A:A	A:A	A:A	G:A	G:G	T:T	T:A	C:C	T:T	G:A	C:A	A:A	C:C	G:A	T:T	T:T	T:T	T:T	G:G	T:G	G:G	G:G	A:A	T:T	A:C
46	B-case_II-39	2017_GBS	train set	case	case	G:G	T:T	C:C	G:G	G:A	A:C	G:A	G:G	T:T	T:C	T:T	G:G	A:A	A:A	C:C	T:T	G:G	C:T	A:G	A:A	A:A	A:G	G:G	G:G	T:T	T:T	C:C	T:T	G:G	C:A	A:A	C:T	G:G	T:A	T:T	A:A	T:C	G:G	T:G	G:G	G:G	G:G	T:T	A:C
47	B-case_II-4	2017_GBS	train set	case	case	G:G	T:T	C:C	G:C	G:G	A:A	G:G	G:G	T:C	T:T	No Call	C:C	A:A	A:A	C:T	T:C	G:T	C:T	A:G	A:A	A:A	A:A	G:A	G:G	T:C	T:A	C:C	T:T	G:A	C:A	A:A	C:C	G:A	T:T	T:T	T:T	T:T	G:G	G:G	A:G	G:G	G:A	T:T	A:A
48	B-case_II-40	2017_GBS	train set	case	case	G:G	T:T	C:C	G:G	G:A	A:C	G:A	G:G	T:T	C:C	T:T	G:C	A:A	G:A	C:C	T:T	G:G	C:T	A:G	A:A	A:A	A:G	G:G	G:G	T:C	T:T	C:C	T:T	A:A	C:C	A:A	C:C	G:G	A:A	T:T	T:A	T:C	G:G	T:G	A:A	G:G	G:G	T:T	A:C
49	B-case_II-41	2017_GBS	test set	case	case	G:G	T:T	C:C	G:G	A:A	C:C	A:A	G:G	T:C	T:T	T:T	G:C	A:A	A:A	C:C	T:T	G:G	C:T	A:G	A:A	A:A	A:A	G:G	G:G	T:C	T:T	C:C	T:T	G:A	C:C	A:A	C:C	G:G	T:A	T:T	T:A	T:T	G:G	T:G	A:A	G:G	G:G	T:T	A:C
50	B-case_II-42	2017_GBS	train set	case	case	G:G	T:T	C:C	G:G	G:G	A:A	G:G	G:G	T:T	T:T	T:T	G:C	A:A	A:A	C:C	T:T	G:G	C:T	A:G	A:A	A:A	A:A	G:G	G:G	T:T	T:A	C:C	T:T	G:G	A:A	G:G	C:T	A:A	T:A	T:T	T:A	T:C	G:G	T:G	G:G	A:G	G:G	T:T	A:A
51	B-case_II-43	2017_GBS	train set	case	case	G:G	T:T	C:C	G:C	G:G	A:A	G:G	G:G	T:C	T:T	T:T	G:C	A:A	A:A	C:T	T:C	G:T	C:T	A:G	A:A	A:A	A:A	G:A	G:G	T:C	A:A	C:C	T:T	G:A	C:A	A:A	T:T	G:A	T:T	T:T	T:A	C:C	G:G	G:G	A:G	G:G	G:A	T:T	A:A
52	B-case_II-44	2017_GBS	train set	case	case	G:G	T:T	C:C	G:G	G:A	A:C	G:A	G:G	T:C	T:C	T:T	C:C	A:A	A:A	C:T	No Call	G:T	C:T	A:G	A:A	A:A	A:A	G:A	G:G	T:C	A:A	C:C	T:T	G:G	C:A	A:A	T:T	G:A	T:A	T:T	T:T	C:C	G:G	G:G	A:G	G:G	G:A	T:T	A:A
53	B-case_II-45	2017_GBS	train set	case	case	G:G	T:T	C:C	G:G	G:A	A:C	G:A	G:G	T:T	T:C	T:T	G:G	A:A	A:A	C:C	T:T	G:G	T:T	G:G	A:A	A:A	A:G	G:G	G:G	T:T	T:A	C:C	T:T	G:A	C:A	A:G	C:T	G:A	A:A	T:T	A:A	T:C	G:G	T:G	G:G	G:G	G:G	T:T	A:C
54	B-case_II-46	2017_GBS	train set	case	case	G:G	T:T	C:C	G:C	G:A	A:C	G:A	G:G	T:T	T:C	T:T	G:G	A:A	A:A	C:C	T:T	G:G	C:T	A:G	A:A	A:A	A:G	G:G	G:G	C:C	T:T	C:C	T:T	G:A	C:C	A:A	C:T	G:G	T:A	T:T	T:A	C:C	G:G	G:G	G:G	A:A	G:G	T:T	A:C
55	B-case_II-47	2017_GBS	train set	case	case	G:G	T:T	C:C	G:G	G:G	A:A	G:G	G:G	T:T	T:T	T:T	G:C	A:A	G:A	T:T	C:C	G:T	T:T	G:G	A:A	A:A	A:G	G:A	G:G	T:T	A:A	C:C	T:T	G:A	A:A	A:A	T:T	G:A	T:T	T:T	T:T	C:C	G:G	T:G	G:G	A:G	A:A	T:T	A:A
56	B-case_II-48	2017_GBS	test set	case	case	G:T	T:T	C:C	G:G	G:G	A:A	G:G	G:G	T:C	T:T	T:T	G:G	A:A	A:A	C:C	T:T	G:G	C:T	A:G	A:A	A:A	A:G	G:G	G:A	T:C	T:T	C:C	T:T	G:G	C:A	A:G	C:T	G:A	T:T	T:T	A:A	T:C	G:T	T:T	G:G	A:G	G:G	T:T	A:C
57	B-case_II-49	2017_GBS	train set	case	case	G:G	T:T	C:C	G:G	G:G	A:A	G:G	G:G	T:T	T:T	T:C	G:G	A:A	G:A	C:C	T:T	G:G	T:T	G:G	A:A	A:A	A:G	G:G	G:A	T:T	T:T	C:C	T:T	G:G	C:C	A:A	C:T	G:G	T:T	T:T	T:A	T:C	G:G	T:T	A:G	A:G	G:G	T:T	A:A
58	B-case_II-5	2017_GBS	train set	case	case	G:G	T:T	C:C	G:C	G:A	A:C	G:A	G:G	T:T	T:C	T:T	G:G	A:A	A:A	C:C	T:T	G:G	C:T	A:G	A:A	A:A	A:G	G:G	G:G	T:C	T:A	C:C	T:T	G:G	C:A	A:A	C:T	G:G	T:A	T:T	T:A	T:C	G:G	G:G	G:G	A:A	G:G	T:T	A:C
59	B-case_II-50	2017_GBS	train set	case	case	G:G	T:T	C:C	G:G	G:G	A:A	G:G	G:G	T:T	T:T	T:T	G:G	A:A	A:A	C:T	No Call	G:T	C:T	A:G	A:A	A:A	A:A	G:A	G:G	T:C	T:A	C:C	T:T	G:G	A:A	A:G	C:T	A:A	T:A	T:T	T:T	T:C	G:G	T:G	G:G	A:G	G:A	T:T	A:A
60	B-case_II-51	2017_GBS	train set	case	case	G:G	T:T	C:C	G:G	G:A	A:C	G:A	G:G	T:T	T:T	T:T	G:G	A:A	A:A	C:T	T:C	G:T	T:T	G:G	A:A	A:A	A:G	G:A	G:A	T:T	T:A	C:C	T:T	G:A	C:A	A:A	C:T	G:A	T:A	T:T	A:A	T:C	G:G	T:G	G:G	G:G	G:A	T:T	A:A
61	B-case_II-52	2017_GBS	train set	case	case	G:G	T:T	C:C	G:C	A:A	C:C	A:A	G:G	T:T	T:C	T:T	G:G	A:A	A:A	C:C	T:T	G:G	C:T	A:G	A:A	A:A	A:G	G:G	G:G	C:C	T:A	C:C	T:T	G:G	C:C	A:A	C:T	G:G	T:T	T:T	T:A	T:C	G:G	G:G	G:G	A:G	G:G	T:T	A:C
62	B-case_II-53	2017_GBS	train set	case	case	G:G	T:T	C:C	G:G	G:A	A:C	G:A	G:G	T:T	T:C	T:T	G:G	A:A	A:A	C:C	T:T	G:G	C:T	A:G	A:A	A:A	A:A	G:G	G:G	T:C	T:T	C:C	T:T	G:A	C:A	A:G	C:T	G:A	A:A	T:T	A:A	T:C	G:G	T:G	G:G	A:A	G:G	T:T	A:C
63	B-case_II-54	2017_GBS	train set	case	case	G:G	T:T	C:C	G:C	G:G	A:A	G:G	G:G	T:C	T:T	T:T	G:C	A:A	A:A	C:T	T:C	G:T	C:C	A:A	A:A	A:A	A:A	G:A	G:G	T:C	A:A	C:C	T:T	G:A	C:A	A:A	C:T	G:A	T:T	T:T	T:T	T:C	G:G	G:G	G:G	G:G	G:A	T:T	A:A
64	B-case_II-55	2017_GBS	train set	case	case	G:G	T:T	C:C	G:G	G:G	A:A	G:G	G:G	T:T	T:T	T:C	G:C	A:A	G:A	C:C	T:C	G:T	C:T	A:G	A:A	A:A	A:G	G:A	G:G	T:T	T:A	C:C	T:T	G:A	C:C	A:A	C:C	G:A	T:A	T:T	T:T	T:T	G:G	T:G	G:G	G:G	G:A	T:T	A:A
65	B-case_II-56	2017_GBS	test set	case	case	G:G	T:T	No Call	G:C	G:A	A:C	G:A	G:G	T:T	T:C	T:T	G:G	A:A	G:A	C:T	T:T	G:G	C:T	A:G	A:A	A:A	A:G	G:G	G:G	T:C	T:T	C:T	T:T	G:G	A:A	A:A	C:T	G:G	A:A	T:T	T:A	C:C	G:G	T:T	A:G	A:G	G:A	T:T	A:C
66	B-case_II-6	2017_GBS	test set	case	case	G:G	T:T	C:C	G:G	No Call	A:A	G:G	G:G	T:T	T:C	T:T	G:G	A:A	G:A	C:C	T:T	G:G	C:C	A:A	A:A	A:A	A:A	G:G	G:G	C:C	T:T	C:C	T:T	G:G	C:A	G:G	T:T	G:A	T:A	T:T	T:A	C:C	G:G	T:T	G:G	A:A	G:G	T:T	A:A
67	B-case_II-7	2017_GBS	train set	case	case	G:G	T:T	C:C	G:G	G:G	A:A	G:G	G:G	T:T	T:C	T:T	G:C	A:A	A:A	C:C	T:T	G:G	C:T	A:G	A:A	A:A	A:A	G:G	G:G	C:C	T:T	C:C	T:T	G:A	C:A	A:A	C:C	G:G	T:A	T:T	T:A	T:C	G:G	G:G	G:G	A:G	G:G	T:T	A:C
68	B-case_II-8	2017_GBS	train set	case	case	No Call	T:T	C:C	G:C	G:G	A:A	G:G	G:G	T:T	T:T	T:T	G:G	A:A	A:A	C:C	T:T	G:G	C:T	A:G	A:A	A:A	A:A	G:G	G:G	T:T	T:T	C:C	T:T	G:G	C:C	A:A	C:T	G:G	T:A	T:T	A:A	C:C	G:G	T:T	G:G	G:G	G:G	T:T	C:C
69	B-case_II-9	2017_GBS	train set	case	case	G:T	T:T	C:C	G:G	G:G	A:A	G:G	G:G	T:T	T:T	T:C	G:C	A:A	G:A	C:T	C:C	G:T	T:T	G:G	A:A	A:A	A:A	G:A	G:A	T:T	T:A	C:C	T:T	G:A	A:A	A:A	C:T	G:A	T:T	T:T	T:A	T:C	G:G	T:G	G:G	G:G	G:A	T:T	A:A
70	G-case_I-81	2017_GBS	train set	case	case	G:G	T:C	C:C	G:C	No Call	A:A	G:G	G:G	T:T	T:T	T:C	G:G	A:A	A:A	C:T	T:T	G:T	C:C	A:A	A:A	A:A	A:G	G:G	A:A	T:C	T:A	C:C	T:T	G:G	C:A	A:A	C:C	G:G	A:A	T:T	T:A	T:C	G:G	T:T	G:G	A:A	G:G	T:T	A:A
71	G-case_I-82	2017_GBS	train set	case	case	No Call	T:T	C:C	G:G	G:G	A:A	G:G	G:G	C:C	T:T	T:T	G:G	A:G	G:G	C:C	T:T	G:G	C:C	A:A	A:G	A:T	A:A	G:G	G:G	T:C	T:T	C:T	T:T	G:G	C:C	A:G	C:C	G:A	T:A	T:T	A:A	T:T	G:G	T:T	A:A	A:G	G:G	T:T	No Call
72	G-case_I-83	2017_GBS	train set	case	case	G:G	T:T	C:C	G:G	G:G	A:A	G:G	G:T	C:C	T:T	T:T	G:G	A:G	A:A	C:T	T:T	G:G	C:C	A:A	A:A	A:A	A:A	G:G	G:G	C:C	T:A	C:C	T:T	G:A	C:C	A:G	C:T	G:G	A:A	T:T	T:A	C:C	G:G	T:T	A:G	A:A	G:G	T:C	C:C
73	G-case_I-84	2017_GBS	train set	case	case	G:G	T:T	C:C	G:G	G:G	A:A	G:G	G:G	T:C	T:T	T:T	G:G	A:A	A:A	C:C	T:T	G:G	C:T	A:G	A:A	A:A	A:A	G:G	G:G	T:T	T:T	C:C	T:T	G:G	C:A	A:A	C:T	G:G	T:A	T:T	T:A	C:C	G:G	T:T	A:G	A:G	G:G	T:T	A:C
74	G-case_I-85	2017_GBS	train set	case	case	No Call	T:T	C:C	G:G	G:G	A:A	G:G	G:G	T:C	T:T	T:T	G:G	A:A	G:A	C:C	T:T	G:G	C:C	A:A	A:G	A:A	A:A	G:G	G:G	T:T	T:T	C:C	T:T	G:G	C:C	A:G	C:C	G:G	A:A	T:T	T:T	T:C	G:G	T:G	A:G	A:A	G:G	T:T	C:C
75	G-case_I-86	2017_GBS	train set	case	case	G:G	T:T	C:C	G:G	G:G	A:A	G:G	G:G	T:T	T:T	T:T	G:G	A:G	A:A	C:T	T:T	G:G	C:C	A:A	A:A	A:A	A:A	G:G	G:G	C:C	T:T	C:C	T:T	G:G	C:C	A:A	T:T	G:G	T:A	T:T	T:T	C:C	G:G	T:G	A:G	A:A	G:G	T:T	A:C
76	G-case_I-87	2017_GBS	train set	case	case	G:G	T:T	C:C	G:G	No Call	No Call	No Call	G:G	T:T	T:T	T:T	G:G	A:A	A:A	C:T	T:T	G:G	C:T	A:G	A:A	A:A	A:A	G:G	G:A	T:T	T:T	C:C	T:T	G:G	C:A	A:A	T:T	G:A	T:T	T:T	T:T	C:C	G:G	T:T	G:G	G:G	G:G	T:T	A:C
77	G-case_I-88	2017_GBS	train set	case	case	G:G	T:T	C:C	G:G	G:A	A:C	G:A	G:T	C:C	T:T	T:T	G:G	A:A	G:A	C:C	T:T	G:G	C:C	A:A	A:A	A:A	A:A	G:G	G:G	C:C	T:T	C:T	T:T	G:G	C:C	A:G	T:T	G:A	T:A	C:C	T:A	C:C	G:G	T:T	G:G	A:G	G:G	T:T	A:C
78	G-case_I-1	2017_GBS	train set	case	case	G:G	T:T	C:C	G:G	G:A	A:C	G:A	G:G	T:T	T:T	T:T	G:G	A:G	G:A	C:C	T:T	G:G	C:T	A:G	A:A	A:A	A:G	G:G	G:G	T:T	T:T	C:C	T:T	G:G	A:A	A:G	T:T	G:A	T:A	T:T	T:A	C:C	G:G	T:T	A:G	A:A	G:G	T:T	A:A
79	G-case_I-10	2017_GBS	train set	case	case	G:G	T:T	C:C	G:G	G:G	A:A	G:G	G:T	T:T	T:T	T:C	G:G	A:A	A:A	C:T	T:T	G:T	C:T	A:G	A:A	A:A	A:G	G:G	G:A	T:T	T:T	C:C	T:T	G:G	C:C	A:A	C:T	G:G	T:A	T:T	T:A	T:C	G:G	T:T	G:G	A:G	G:G	T:T	A:A
80	G-case_I-100	2017_GBS	train set	case	case	G:G	T:C	C:C	G:G	G:A	A:C	G:A	G:G	T:C	T:T	T:C	G:G	A:A	A:A	C:T	T:T	G:T	C:C	A:A	A:A	A:A	A:G	G:G	G:A	T:C	T:T	C:C	T:T	G:G	C:A	A:G	C:T	G:A	T:A	T:C	T:A	T:C	G:G	T:T	A:G	A:A	G:G	T:T	A:C
81	G-case_I-11	2017_GBS	train set	case	case	G:G	T:T	C:C	G:G	G:A	A:C	G:A	G:G	T:C	T:T	C:C	G:C	A:A	A:A	C:C	T:T	G:G	C:C	A:A	A:A	A:A	A:G	G:A	G:A	T:C	T:A	C:C	T:T	G:G	C:C	A:A	C:T	G:A	T:A	T:C	T:T	T:T	G:G	T:T	G:G	A:G	G:G	T:T	A:C
82	G-case_I-12	2017_GBS	train set	case	case	G:G	C:C	C:C	G:C	G:A	A:C	G:A	G:G	T:C	T:T	T:C	G:G	A:A	A:A	C:C	T:T	G:G	C:C	A:A	A:A	A:A	A:G	G:G	G:A	C:C	T:T	C:C	T:T	G:G	C:A	A:A	C:T	G:A	T:A	T:C	T:A	T:C	G:G	T:T	G:G	A:G	G:G	T:T	A:A
83	G-case_I-13	2017_GBS	train set	case	case	G:G	T:T	C:C	G:G	G:G	A:A	G:G	G:G	T:T	T:T	T:T	G:G	A:A	G:A	C:T	T:T	G:G	T:T	G:G	A:G	A:T	A:A	G:G	G:G	T:C	T:T	C:C	T:T	G:G	C:A	A:G	C:T	G:G	T:T	T:T	T:A	T:C	G:G	T:T	A:G	A:A	G:G	T:T	A:C
84	G-case_I-14	2017_GBS	train set	case	case	No Call	T:T	C:T	No Call	G:A	A:C	G:A	G:T	T:T	T:T	T:T	G:G	G:G	A:A	C:C	T:T	G:G	C:C	A:A	A:G	A:A	A:A	G:G	G:G	T:C	T:T	C:C	G:G	G:G	C:C	A:G	T:T	G:G	T:A	T:T	A:A	C:C	T:T	T:T	A:A	A:G	G:G	T:T	C:C
85	G-case_I-15	2017_GBS	train set	case	case	G:G	T:C	C:C	G:C	G:A	A:C	G:A	G:G	T:T	T:T	T:C	G:G	A:A	A:A	C:C	T:T	G:G	C:T	A:G	A:A	A:A	A:G	G:G	G:A	T:T	T:A	C:C	T:T	G:G	C:A	A:G	C:T	G:A	T:A	T:C	T:A	T:T	G:G	T:T	G:G	A:G	G:G	T:T	A:A
86	G-case_I-16	2017_GBS	train set	case	case	G:G	T:C	C:C	G:C	G:A	A:C	G:A	G:G	T:T	T:T	T:C	G:G	A:A	G:A	C:T	T:T	G:T	C:C	A:A	A:A	A:A	G:G	G:G	G:G	T:C	T:T	C:C	T:T	G:G	A:A	A:A	C:T	G:A	T:A	T:C	T:T	T:T	G:G	T:T	A:G	A:G	G:G	T:T	A:C
87	G-case_I-17	2017_GBS	train set	case	case	G:G	T:C	C:C	G:G	G:A	A:C	G:A	G:G	T:T	T:T	T:T	G:G	A:A	A:A	C:T	T:T	G:T	C:C	A:A	A:A	A:A	A:G	G:G	A:A	T:T	T:T	C:C	T:T	G:G	A:A	A:A	C:T	G:A	A:A	T:T	T:A	T:T	G:G	T:T	G:G	A:G	G:G	T:T	A:C
88	G-case_I-18	2017_GBS	test set	case	case	G:G	T:C	C:C	G:G	G:G	A:A	G:G	G:T	T:T	T:T	T:C	G:G	A:A	A:A	C:C	T:T	G:G	C:C	A:A	A:A	A:A	A:G	G:G	G:G	T:C	T:T	C:C	T:T	G:G	C:C	A:A	C:T	G:G	T:A	No Call	T:A	T:T	G:G	T:T	A:G	A:A	G:G	T:T	A:A
89	G-case_I-19	2017_GBS	train set	case	case	G:G	T:T	C:C	G:G	G:G	A:A	G:G	G:G	T:C	T:T	T:T	G:G	A:G	G:A	C:T	T:T	G:G	C:C	A:A	A:A	A:A	A:A	G:G	G:G	T:C	T:T	C:C	T:T	G:G	C:A	A:A	T:T	G:G	T:T	T:T	A:A	T:C	G:G	T:T	G:G	A:G	G:G	T:T	A:A
90	G-case_I-2	2017_GBS	train set	case	case	G:G	T:T	C:C	C:C	G:G	A:A	G:G	G:G	T:T	T:T	C:C	G:G	A:A	A:A	C:C	T:T	G:G	C:T	A:G	A:G	A:A	G:G	G:G	A:A	T:C	T:T	C:C	T:T	G:G	C:A	A:A	C:T	G:A	A:A	T:C	T:A	T:T	G:G	T:T	G:G	A:A	G:G	T:T	A:A
91	G-case_I-20	2017_GBS	train set	case	case	G:G	T:T	C:C	G:G	G:A	A:C	G:A	G:G	T:C	T:T	T:T	G:G	A:A	A:A	C:C	T:T	G:G	C:C	A:A	A:A	A:A	A:A	G:G	G:G	T:T	T:T	C:C	T:T	G:G	C:A	A:G	T:T	G:G	T:A	No Call	T:A	C:C	G:G	T:T	A:G	A:G	G:G	T:T	A:C
92	G-case_I-21	2017_GBS	train set	case	case	G:G	T:C	C:C	G:G	G:A	A:C	G:A	G:G	T:C	T:T	T:C	G:G	A:A	G:A	C:T	T:T	G:T	C:T	A:G	A:A	A:A	A:G	G:G	G:A	T:T	T:T	C:C	T:T	G:G	C:C	A:G	C:T	G:G	A:A	T:T	T:A	T:T	G:G	T:T	A:G	A:A	G:G	T:T	A:A
93	G-case_I-22	2017_GBS	train set	case	case	G:G	T:T	C:C	G:G	G:G	A:A	G:G	G:T	T:C	T:T	T:T	G:G	A:A	A:A	C:T	T:T	G:G	C:C	A:A	A:A	A:A	A:A	G:G	G:G	C:C	T:T	C:C	T:T	G:G	C:C	A:A	T:T	G:A	A:A	T:T	T:A	C:C	G:G	T:T	A:G	A:G	G:G	T:T	A:A
94	G-case_I-23	2017_GBS	train set	case	case	G:G	T:T	C:C	G:G	G:G	A:A	G:G	G:G	T:C	T:T	T:T	G:G	A:A	A:A	C:C	T:T	G:G	C:T	A:G	A:G	A:T	A:A	G:G	G:G	T:C	T:T	C:T	T:G	G:G	C:C	A:A	C:T	G:G	T:A	T:T	A:A	C:C	G:T	T:T	G:G	A:A	G:G	T:T	A:C
95	G-case_I-24	2017_GBS	train set	case	case	G:G	T:T	C:C	G:G	G:G	A:A	G:G	G:G	T:T	T:T	T:C	G:G	A:A	A:A	T:T	T:T	G:T	C:C	A:A	A:A	A:A	A:G	G:G	G:A	C:C	T:T	C:C	T:T	G:G	A:A	A:A	C:C	G:A	A:A	T:C	T:T	T:C	G:G	T:T	G:G	A:G	G:G	T:T	A:C
96	G-case_I-25	2017_GBS	train set	case	case	G:G	T:C	C:C	G:G	G:G	A:A	G:G	G:G	T:C	T:T	T:T	G:G	A:A	A:A	C:T	T:T	G:T	C:C	A:A	A:A	A:A	A:G	G:G	G:G	T:C	T:T	C:C	T:T	G:G	C:C	A:A	C:T	G:G	No Call	T:T	T:A	T:C	G:G	T:T	A:G	A:A	G:G	T:T	A:A
97	G-case_I-26	2017_GBS	train set	case	case	G:G	T:T	C:C	G:G	G:A	A:C	G:A	G:G	T:T	T:T	T:C	G:G	A:A	A:A	T:T	T:T	G:T	C:C	A:A	A:A	A:A	A:G	G:G	G:A	C:C	T:T	C:C	T:T	G:G	A:A	A:A	C:C	G:A	A:A	T:C	T:T	T:C	G:G	T:T	G:G	A:G	G:G	T:T	A:C
98	G-case_I-27	2017_GBS	train set	case	case	G:G	No Call	C:C	G:G	G:A	A:C	G:A	G:G	C:C	T:T	T:T	G:G	G:G	A:A	C:T	T:T	G:G	T:T	G:G	A:A	A:A	A:A	G:G	G:G	T:T	T:T	C:C	T:T	G:G	C:A	A:G	T:T	G:G	T:A	T:T	T:A	C:C	G:G	T:T	G:G	A:G	G:G	T:T	A:A
99	G-case_I-28	2017_GBS	train set	case	case	G:G	T:T	C:C	G:G	G:G	A:A	G:G	G:G	T:T	T:T	T:T	G:G	A:G	A:A	C:C	T:T	G:G	C:T	A:G	A:A	A:T	A:A	G:G	G:G	T:C	T:T	C:T	T:G	G:G	C:C	A:A	T:T	G:G	T:T	T:T	A:A	C:C	G:T	T:G	A:G	A:G	G:G	T:T	A:C
100	G-case_I-29	2017_GBS	train set	case	case	G:G	T:T	C:C	G:G	G:G	A:A	G:G	G:T	C:C	T:T	T:T	G:G	A:G	A:A	C:C	T:T	G:G	C:C	A:A	A:A	A:T	A:A	G:G	G:G	T:C	T:T	C:C	T:T	G:G	C:C	G:G	C:C	G:G	T:T	T:T	A:A	T:T	G:G	T:T	G:G	A:G	G:G	T:T	C:C
101	G-case_I-3	2017_GBS	train set	case	case	G:G	T:C	C:C	C:C	G:A	A:C	G:A	G:G	T:T	T:T	C:C	G:G	A:G	A:A	C:C	T:T	G:G	C:T	A:G	A:A	A:A	A:G	G:G	G:G	T:C	T:T	C:C	T:T	G:G	C:A	A:A	C:T	G:G	A:A	T:C	T:T	T:T	G:G	T:T	G:G	A:G	G:G	T:T	A:C
102	G-case_I-30	2017_GBS	train set	case	case	G:G	T:C	C:C	G:C	G:A	A:C	G:A	G:G	T:C	T:T	T:C	G:G	A:A	A:A	C:C	T:T	G:G	C:T	A:G	A:A	A:T	A:G	G:G	G:A	T:C	T:T	C:T	T:T	G:G	C:C	A:A	C:T	G:G	T:A	T:C	T:A	T:T	G:G	T:T	A:G	A:A	G:G	T:T	A:C
103	G-case_I-31	2017_GBS	train set	case	case	G:G	T:T	C:C	G:G	G:G	A:A	G:G	G:G	T:C	T:T	T:T	G:G	A:A	G:A	T:T	T:T	G:G	T:T	G:G	A:A	A:T	A:A	G:G	G:G	T:C	T:T	C:C	T:T	G:G	C:C	A:G	T:T	G:G	T:T	T:T	T:A	C:C	G:G	T:T	G:G	A:A	G:G	T:T	A:C
104	G-case_I-32	2017_GBS	train set	case	case	G:G	T:T	C:C	G:C	G:G	A:A	G:G	G:G	C:C	T:T	T:T	G:G	A:A	A:A	C:T	T:T	G:G	C:C	A:A	A:A	A:A	A:A	G:G	G:G	T:T	T:T	C:C	T:T	G:G	A:A	A:A	T:T	G:A	T:A	T:T	A:A	C:C	G:G	T:G	No Call	A:G	G:G	T:T	A:C
105	G-case_I-33	2017_GBS	train set	case	case	G:G	T:T	C:C	G:G	G:G	A:A	G:G	G:G	T:C	T:T	T:T	G:G	A:G	A:A	C:C	T:C	G:G	C:T	A:G	A:G	A:A	A:A	G:G	G:A	T:C	T:T	C:C	T:T	G:G	C:C	A:A	T:T	G:G	T:A	T:T	A:A	C:C	G:G	T:T	A:G	A:G	G:G	T:T	A:C
106	G-case_I-34	2017_GBS	train set	case	case	G:G	T:T	C:C	G:G	G:G	A:A	G:G	G:G	C:C	T:T	T:T	G:G	A:A	A:A	T:T	T:T	G:G	C:T	A:G	A:A	A:A	A:A	G:G	G:G	T:C	T:T	C:C	T:T	G:G	C:C	A:G	No Call	G:G	T:A	T:T	A:A	C:C	G:G	T:T	G:G	A:A	G:G	T:C	A:A
107	G-case_I-35	2017_GBS	train set	case	case	G:G	T:T	C:C	G:G	G:A	A:C	G:A	G:G	T:C	T:T	T:T	G:G	A:A	G:A	C:C	T:T	G:G	C:C	A:A	A:A	A:A	A:A	G:G	G:G	T:C	T:T	C:T	T:T	G:G	C:C	A:A	C:C	G:G	A:A	T:T	T:A	T:T	G:G	T:T	A:A	A:A	G:G	T:C	A:C
108	G-case_I-36	2017_GBS	train set	case	case	No Call	T:T	C:C	G:G	G:G	A:A	G:G	G:T	T:T	T:T	T:T	G:G	A:A	A:A	C:C	T:T	G:G	C:C	A:A	A:A	A:A	A:A	G:G	G:G	T:C	T:T	C:C	T:T	G:G	C:C	A:A	T:T	G:A	T:A	T:T	T:A	C:C	G:G	T:T	A:G	A:G	G:G	T:T	C:C
109	G-case_I-37	2017_GBS	train set	case	case	G:G	T:T	C:C	G:G	G:G	A:A	G:G	G:G	T:C	T:T	T:T	G:C	A:A	A:A	C:C	T:T	G:G	C:T	A:G	A:A	A:T	A:A	G:G	G:G	T:C	T:T	C:C	T:T	G:G	C:C	G:G	T:T	G:A	T:T	T:T	A:A	C:C	G:G	T:T	A:G	A:A	G:G	T:T	A:A
110	G-case_I-38	2017_GBS	test set	case	case	G:G	T:T	C:C	C:C	G:A	A:C	G:A	G:G	T:T	T:T	T:T	G:G	A:A	A:A	C:C	T:T	G:G	C:C	A:A	A:A	A:A	A:G	G:G	G:A	C:C	T:T	C:C	T:T	G:G	C:A	A:G	C:T	G:G	T:A	T:C	T:A	T:C	G:G	T:T	G:G	A:G	G:G	T:T	A:A
111	G-case_I-39	2017_GBS	train set	case	case	G:G	T:T	C:C	C:C	G:G	A:A	G:G	G:G	T:T	T:T	T:T	G:G	A:G	G:A	T:T	T:T	G:T	C:C	A:A	A:A	A:A	A:G	G:G	G:G	T:T	T:T	C:C	T:T	G:G	C:A	A:A	C:T	G:G	No Call	T:T	T:A	T:T	G:G	T:T	A:A	A:G	G:G	T:T	A:C
112	G-case_I-4	2017_GBS	train set	case	case	No Call	T:T	C:T	G:G	G:G	A:A	G:G	G:G	T:T	T:C	T:T	G:G	A:A	A:A	C:C	T:T	G:G	C:C	A:A	A:A	A:T	A:A	G:G	G:A	T:C	T:T	C:C	T:G	G:G	C:C	A:A	T:T	G:G	T:A	T:T	A:A	C:C	T:T	T:T	A:G	A:A	G:G	T:C	C:C
113	G-case_I-40	2017_GBS	train set	case	case	G:G	T:T	C:C	G:G	G:A	A:C	G:A	G:T	C:C	T:T	T:T	G:G	A:A	G:A	C:T	T:T	G:G	C:C	A:A	A:A	A:T	A:A	G:G	G:G	T:C	T:T	C:T	T:T	G:G	C:C	A:G	T:T	G:G	T:T	T:T	A:A	C:C	G:G	T:T	G:G	A:G	G:G	T:T	A:A
114	G-case_I-41	2017_GBS	train set	case	case	G:G	T:T	C:C	G:G	G:G	A:A	G:G	G:G	T:C	T:T	T:T	G:G	A:A	A:A	C:C	T:T	G:G	C:C	A:A	A:A	A:A	A:A	G:G	G:G	T:T	T:T	C:C	T:T	G:G	A:A	A:A	T:T	G:G	T:A	T:T	T:A	C:C	G:G	T:T	G:G	A:G	G:G	T:T	A:C
115	G-case_I-42	2017_GBS	train set	case	case	G:G	No Call	C:C	G:G	G:A	A:C	G:A	G:G	T:C	T:T	T:T	G:G	A:A	A:A	C:C	T:T	G:G	C:T	A:G	A:A	A:A	A:A	G:G	G:G	T:C	T:T	C:C	T:T	G:G	C:A	A:G	T:T	G:G	T:A	T:T	A:A	C:C	G:G	T:T	No Call	A:G	G:G	T:T	C:C
116	G-case_I-43	2017_GBS	train set	case	case	G:G	No Call	C:C	G:G	G:A	A:C	G:A	G:T	T:C	T:T	T:T	G:G	A:A	A:A	C:T	T:C	G:G	C:C	A:A	A:A	A:T	A:A	G:G	G:G	C:C	T:T	C:C	T:G	G:G	C:C	A:A	T:T	G:G	T:A	T:T	A:A	C:C	G:G	T:T	A:G	A:G	G:G	T:T	A:C
117	G-case_I-44	2017_GBS	train set	case	case	G:G	T:T	C:C	G:G	G:G	A:A	G:G	G:G	T:T	T:T	T:T	G:G	A:A	G:A	T:T	T:T	G:G	C:T	A:G	A:A	A:A	A:A	G:G	G:G	T:T	T:A	C:C	T:T	G:G	C:C	A:G	T:T	G:G	T:A	T:T	A:A	C:C	G:G	T:T	G:G	A:A	G:G	T:T	A:A
118	G-case_I-45	2017_GBS	train set	case	case	G:G	T:T	C:C	G:G	G:G	A:A	G:G	G:G	T:C	T:T	T:T	G:G	A:G	G:A	C:C	T:T	G:G	C:T	A:G	A:A	A:A	A:G	G:G	A:A	T:C	T:T	C:C	T:T	G:G	A:A	A:A	C:T	G:A	T:A	T:T	T:A	T:C	G:G	T:T	A:G	A:A	G:G	T:T	A:C
119	G-case_I-46	2017_GBS	train set	case	case	G:G	T:C	C:C	G:C	G:A	A:C	G:A	G:T	T:T	T:T	T:C	G:G	A:A	A:A	C:C	T:T	G:T	C:T	A:G	A:A	A:A	A:G	G:G	G:A	T:C	T:T	C:C	T:T	G:G	C:A	A:A	C:T	G:G	A:A	T:T	T:T	T:T	G:G	T:T	G:G	A:G	G:G	T:T	A:C
120	G-case_I-47	2017_GBS	train set	case	case	G:G	T:T	C:C	C:C	G:A	A:C	G:A	G:G	T:T	T:T	T:C	G:G	A:A	A:A	C:T	T:T	G:T	C:C	A:A	A:A	A:A	A:A	G:G	G:A	T:C	T:T	C:C	T:T	G:G	C:A	A:A	C:T	G:A	No Call	T:T	T:T	T:T	G:G	T:T	G:G	A:A	G:G	T:T	A:A
121	G-case_I-48	2017_GBS	test set	case	control	G:G	T:T	C:T	No Call	G:G	A:C	G:A	T:T	T:T	T:T	T:T	G:G	A:G	A:A	C:C	T:T	G:G	C:C	A:A	A:G	A:A	A:A	G:G	G:G	C:C	T:T	C:T	T:G	G:G	C:C	A:G	T:T	G:G	T:T	T:T	A:A	C:C	G:T	T:T	A:A	A:A	G:G	T:T	C:C
122	G-case_I-49	2017_GBS	train set	case	case	G:G	T:C	C:C	G:C	G:G	A:A	G:G	G:T	T:T	T:T	T:T	G:G	A:A	A:A	C:C	T:T	G:G	C:T	A:G	A:A	A:A	A:G	G:G	G:G	T:C	T:T	C:C	T:T	G:G	C:A	A:A	C:C	G:G	A:A	T:C	T:A	T:T	G:G	T:T	G:G	A:A	G:G	T:T	A:A
123	G-case_I-5	2017_GBS	train set	case	case	G:G	T:T	C:C	G:C	G:G	A:A	G:G	G:G	T:T	T:T	T:T	G:G	A:A	A:A	T:T	T:T	G:T	T:T	G:G	A:A	A:A	A:G	G:G	G:G	T:C	T:T	C:C	T:T	G:G	C:A	A:A	C:C	G:A	No Call	C:C	T:T	T:C	G:G	T:G	G:G	A:G	G:G	T:T	A:A
124	G-case_I-50	2017_GBS	train set	case	case	G:G	T:C	C:C	G:C	G:G	A:A	G:G	G:G	T:T	T:T	T:C	G:G	A:A	A:A	No Call	T:T	G:G	T:T	G:G	A:A	A:A	A:G	G:G	G:G	T:T	T:A	C:C	T:T	G:G	A:A	A:A	C:T	G:A	A:A	T:T	T:T	T:C	G:G	T:T	G:G	A:A	G:G	T:T	A:A
125	G-case_I-51	2017_GBS	train set	case	case	G:G	C:C	C:C	G:G	G:G	A:A	G:G	G:G	T:T	T:T	T:C	G:G	A:A	A:A	C:T	T:T	G:T	C:C	A:A	A:A	A:A	A:G	G:G	G:A	T:T	T:T	C:C	T:T	G:G	C:C	A:G	C:T	G:A	A:A	T:T	T:T	T:C	G:T	T:T	A:G	A:A	G:G	T:T	A:C
126	G-case_I-52	2017_GBS	train set	case	case	G:G	T:T	C:C	G:C	G:G	A:A	G:G	G:G	T:T	T:T	T:C	G:G	A:A	G:G	C:C	T:T	G:G	C:C	A:A	A:A	A:A	A:A	G:G	G:G	T:C	T:T	C:C	T:T	G:G	C:C	A:A	C:C	G:G	T:T	T:T	T:A	T:T	G:G	T:T	G:G	G:G	G:G	T:T	A:C
127	G-case_I-53	2017_GBS	train set	case	case	G:G	C:C	C:C	C:C	G:G	A:A	G:G	G:T	T:C	T:T	No Call	G:G	A:G	A:A	C:C	T:T	G:G	C:T	A:G	A:A	A:A	A:A	G:G	G:G	C:C	T:T	C:C	T:T	G:G	C:C	A:G	C:C	G:A	A:A	No Call	T:A	T:T	G:G	T:T	No Call	A:A	G:G	T:T	A:C
128	G-case_I-54	2017_GBS	train set	case	case	G:G	T:T	C:C	G:G	G:A	A:C	G:A	G:G	T:C	T:T	T:T	G:G	A:A	G:G	C:T	T:T	G:G	C:C	A:A	A:A	A:A	A:A	G:G	G:G	T:C	T:A	C:C	T:T	G:G	C:A	A:A	C:C	G:G	A:A	T:T	T:A	T:T	G:G	T:T	G:G	A:A	G:G	T:T	A:A
129	G-case_I-55	2017_GBS	train set	case	case	G:G	T:T	C:C	G:G	G:G	A:A	G:G	G:T	C:C	T:T	T:T	G:G	A:G	A:A	C:C	T:T	G:G	C:C	A:A	A:A	A:T	A:A	G:G	G:G	C:C	T:T	C:C	T:T	G:G	C:C	A:A	C:T	A:A	T:A	T:C	T:T	T:C	G:G	T:T	A:G	A:A	G:G	T:T	A:C
130	G-case_I-56	2017_GBS	train set	case	case	G:G	T:T	C:C	G:C	G:A	A:C	G:A	G:T	T:C	T:T	T:T	G:G	A:A	A:A	C:C	T:T	G:G	T:T	G:G	A:A	A:T	A:A	G:G	G:G	T:T	T:T	C:T	T:T	G:G	C:C	A:G	C:T	G:A	T:T	T:T	A:A	T:C	G:G	T:T	G:G	A:A	G:G	T:T	A:A
131	G-case_I-57	2017_GBS	train set	case	case	G:G	T:T	C:C	G:G	G:G	A:A	G:G	G:G	T:C	T:T	T:T	G:G	A:G	G:A	C:T	T:T	G:G	C:C	A:A	A:A	A:A	A:A	G:G	G:G	C:C	T:T	C:C	T:T	G:G	C:C	A:A	T:T	G:G	T:T	T:T	A:A	C:C	G:G	T:T	A:G	A:A	G:G	T:C	A:C
132	G-case_I-58	2017_GBS	train set	case	case	No Call	T:T	C:C	G:G	G:A	A:C	G:A	G:T	T:C	T:T	T:T	G:G	A:G	A:A	C:C	T:T	G:G	C:T	A:G	A:A	A:A	A:A	G:G	G:G	T:C	T:T	C:C	T:G	G:G	C:C	G:G	C:T	G:G	T:A	T:T	A:A	T:C	G:T	T:G	A:G	A:G	G:G	T:C	C:C
133	G-case_I-59	2017_GBS	train set	case	case	G:G	T:T	C:C	G:G	G:G	A:A	G:G	G:G	T:T	T:T	T:T	G:G	A:G	A:A	C:C	T:T	G:G	C:C	A:A	A:A	A:A	A:A	G:G	G:G	T:C	T:T	C:C	T:T	G:G	C:A	G:G	T:T	G:G	T:A	T:T	T:A	T:C	G:G	T:T	G:G	A:A	G:G	T:T	A:A
134	G-case_I-6	2017_GBS	train set	case	case	G:G	T:T	C:C	G:G	G:A	A:C	G:A	T:T	T:C	T:T	T:T	G:G	A:A	A:A	C:T	T:T	G:G	C:T	A:G	A:A	A:T	A:A	G:G	G:G	T:C	T:T	C:C	T:T	G:G	C:A	A:A	C:T	G:G	A:A	T:C	T:A	T:T	G:G	T:T	A:G	A:A	G:G	T:T	A:C
135	G-case_I-60	2017_GBS	train set	case	case	G:G	T:T	C:T	G:C	G:G	A:A	G:G	G:G	T:C	T:T	T:T	G:G	A:A	A:A	C:C	T:T	G:G	C:C	A:A	A:A	A:A	A:A	G:G	G:G	T:C	T:A	C:C	T:T	G:G	C:A	A:A	C:C	G:G	A:A	T:T	A:A	T:C	G:G	T:T	A:G	A:G	G:G	T:T	A:C
136	G-case_I-61	2017_GBS	train set	case	case	G:G	T:C	C:C	G:C	No Call	No Call	No Call	G:G	T:C	T:T	T:T	G:G	A:A	A:A	C:C	T:T	G:G	T:T	G:G	A:A	A:T	A:G	G:G	G:A	C:C	T:T	C:C	T:T	G:G	C:C	A:A	C:C	G:G	T:A	T:C	T:T	T:C	G:G	T:G	G:G	A:A	G:G	T:T	A:C
137	G-case_I-62	2017_GBS	train set	case	case	G:G	T:C	C:C	G:G	G:G	A:A	G:G	G:G	T:T	T:T	T:C	G:G	A:A	A:A	C:T	T:T	G:G	T:T	G:G	A:A	A:A	A:G	G:G	G:G	T:C	T:T	C:C	T:T	G:G	A:A	A:A	C:T	G:A	T:A	T:T	T:A	T:C	G:G	T:T	A:G	A:G	G:G	T:T	A:A
138	G-case_I-63	2017_GBS	train set	case	case	G:G	T:T	C:C	G:C	G:G	A:A	G:G	G:G	T:C	T:T	C:C	G:G	A:A	G:A	T:T	T:T	G:G	C:C	A:A	A:A	A:A	A:A	G:G	G:G	T:C	T:A	C:C	T:T	G:A	C:C	A:A	C:C	G:G	T:A	T:T	T:A	T:C	G:G	T:T	G:G	A:A	G:G	T:T	A:C
139	G-case_I-64	2017_GBS	train set	case	case	G:G	T:T	C:C	G:G	G:A	A:C	G:A	G:G	T:T	T:T	T:T	G:G	A:A	G:G	C:C	T:T	G:G	C:T	A:G	A:A	A:A	A:A	G:G	G:G	T:C	T:T	C:T	T:T	G:G	C:A	A:A	C:T	G:G	A:A	T:C	No Call	T:C	G:G	T:G	G:G	A:G	G:G	T:T	No Call
140	G-case_I-65	2017_GBS	train set	case	case	G:G	T:T	C:C	G:G	G:G	A:A	G:G	G:T	T:C	T:T	T:T	G:G	A:G	A:A	C:C	T:T	G:G	C:T	A:G	A:A	A:A	A:A	G:G	G:G	T:C	T:T	C:C	T:T	G:G	A:A	A:A	No Call	G:G	T:A	T:T	T:A	T:C	G:G	T:T	A:G	A:G	G:G	T:T	A:C
141	G-case_I-66	2017_GBS	train set	case	case	G:G	T:T	C:C	G:C	G:A	A:C	G:A	G:G	C:C	T:T	T:T	G:G	A:G	A:A	C:T	T:T	G:G	C:T	A:G	A:A	A:A	A:A	G:G	G:G	T:T	T:T	C:C	T:T	G:G	C:A	A:A	C:C	G:A	T:T	T:T	T:A	T:C	G:G	T:G	A:G	A:G	G:A	T:T	No Call
142	G-case_I-67	2017_GBS	train set	case	case	G:G	T:C	C:C	G:G	G:A	A:C	G:A	G:T	T:C	T:T	T:T	G:G	A:A	A:A	C:T	T:T	G:T	C:C	A:A	A:A	A:A	A:G	G:G	G:G	T:C	T:T	C:C	T:T	G:G	C:A	A:A	C:T	G:A	A:A	T:C	T:T	T:C	G:G	T:T	G:G	A:A	G:G	T:T	A:C
143	G-case_I-68	2017_GBS	train set	case	case	G:G	T:T	C:C	G:G	G:A	A:C	G:A	G:G	C:C	T:T	T:T	G:G	A:G	A:A	C:C	T:T	G:G	C:T	A:G	A:A	A:A	A:A	G:G	G:G	T:C	T:T	C:C	T:T	G:G	C:C	A:G	T:T	G:G	T:T	T:T	T:A	C:C	G:G	T:T	A:G	A:G	G:G	T:T	C:C
144	G-case_I-69	2017_GBS	train set	case	case	G:G	T:T	C:C	G:G	G:G	A:A	G:G	G:T	T:T	T:T	T:T	G:G	A:A	A:A	C:T	T:T	G:G	C:T	A:G	A:A	A:A	A:A	G:G	G:G	T:C	T:T	C:C	T:T	G:G	C:A	A:A	T:T	A:A	T:T	T:T	T:A	C:C	G:G	T:G	G:G	A:G	G:A	T:T	A:A
145	G-case_I-7	2017_GBS	train set	case	case	G:G	T:T	C:C	G:G	G:A	A:C	G:A	G:G	T:T	T:T	T:T	G:G	A:A	A:A	C:T	T:T	G:T	T:T	G:G	A:A	A:A	A:G	G:G	G:A	T:C	T:T	C:C	T:T	G:G	C:C	A:G	C:C	A:A	T:A	T:C	T:A	T:T	G:G	T:G	A:G	A:G	G:G	T:T	A:C
146	G-case_I-70	2017_GBS	train set	case	case	G:G	T:T	C:T	G:G	G:G	A:A	G:G	G:G	T:C	T:T	T:T	G:G	A:A	A:A	C:T	T:T	G:G	C:C	A:A	A:G	A:A	A:A	G:G	G:A	C:C	T:T	C:C	T:T	G:G	C:C	A:A	T:T	G:G	T:T	T:T	T:A	T:C	G:G	T:T	A:G	A:A	G:G	T:T	A:A
147	G-case_I-71	2017_GBS	train set	case	case	G:G	T:T	C:C	G:G	G:A	A:C	G:A	T:T	T:C	T:T	T:T	G:G	A:A	G:A	C:C	T:T	G:G	C:C	A:A	A:A	A:T	A:A	G:G	G:G	T:C	T:A	C:C	T:T	G:G	C:A	A:A	C:C	G:G	A:A	T:T	T:T	T:T	G:G	T:T	G:G	A:A	G:G	T:T	A:C
148	G-case_I-72	2017_GBS	train set	case	case	G:G	T:T	C:C	G:G	G:G	A:A	G:G	G:G	T:C	T:T	T:T	G:G	A:A	A:A	C:T	T:T	G:G	C:C	A:A	A:A	A:A	A:A	G:G	G:G	T:C	T:T	C:C	T:T	G:G	C:A	A:A	C:C	G:G	T:T	T:T	T:T	T:C	G:G	T:G	G:G	A:A	G:G	T:T	A:C
149	G-case_I-73	2017_GBS	train set	case	case	No Call	T:T	C:T	G:G	G:A	A:C	G:A	G:G	C:C	T:T	T:T	No Call	A:G	A:A	C:C	T:T	G:G	C:C	A:A	A:G	A:A	A:A	G:G	G:G	T:C	T:T	C:T	T:G	G:G	C:A	A:A	T:T	G:G	T:A	T:T	A:A	C:C	G:T	T:G	A:G	A:A	G:G	T:C	C:C
150	G-case_I-74	2017_GBS	train set	case	case	G:G	T:C	C:C	G:C	G:G	A:A	G:G	G:G	T:T	T:T	T:C	G:G	A:A	A:A	C:C	T:T	G:G	C:T	A:G	A:A	A:A	A:G	G:G	G:G	T:T	T:T	C:T	T:T	G:G	C:C	A:G	C:T	G:A	T:A	T:C	T:T	T:C	G:G	T:T	A:G	A:A	G:G	T:T	A:C
151	G-case_I-75	2017_GBS	train set	case	case	G:G	T:T	C:C	G:G	G:A	A:C	G:A	G:G	T:C	T:T	T:T	G:G	A:A	G:A	C:T	T:T	G:G	C:T	A:G	A:G	A:A	A:G	G:G	G:G	T:C	T:T	C:C	T:T	G:G	C:C	A:G	C:C	G:G	T:A	T:T	T:A	T:C	G:G	T:T	A:G	A:A	G:G	T:T	C:C
152	G-case_I-76	2017_GBS	train set	case	case	G:G	T:C	C:C	G:G	G:A	A:C	G:A	G:G	T:T	T:T	T:C	G:G	A:A	A:A	C:C	T:T	G:G	C:C	A:A	A:A	A:A	A:G	G:G	G:A	T:T	T:T	C:C	T:T	G:G	C:A	A:A	C:T	G:G	A:A	T:C	T:T	T:C	G:G	T:T	A:G	A:A	G:G	T:T	A:C
153	G-case_I-77	2017_GBS	test set	case	case	G:G	T:T	C:C	G:C	G:A	A:C	G:A	G:T	T:C	T:T	T:T	G:G	A:A	A:A	C:T	T:T	G:T	T:T	G:G	A:A	A:A	A:G	G:G	G:A	T:T	T:T	C:C	T:T	G:G	A:A	A:G	C:T	G:A	T:A	T:C	T:A	T:C	G:G	T:T	G:G	A:A	G:G	T:T	A:A
154	G-case_I-78	2017_GBS	train set	case	case	G:G	T:T	C:C	G:G	G:G	A:A	No Call	G:G	T:C	T:T	T:T	G:G	A:A	G:A	T:T	T:T	G:G	T:T	G:G	A:A	A:T	A:A	G:G	G:G	T:T	T:T	C:C	T:T	G:G	C:C	A:A	T:T	G:G	T:A	T:T	T:A	C:C	G:G	T:T	G:G	A:G	G:G	T:T	A:A
155	G-case_I-79	2017_GBS	train set	case	case	G:G	T:T	C:C	G:G	No Call	No Call	No Call	G:G	T:C	T:T	No Call	G:G	A:G	A:A	No Call	T:T	G:T	C:T	A:G	A:G	A:A	A:A	G:G	G:A	T:C	T:T	C:C	T:T	G:G	C:A	A:G	C:T	G:G	T:A	No Call	T:T	T:C	G:G	T:T	A:A	A:G	G:G	T:T	A:C
156	G-case_I-8	2017_GBS	train set	case	case	G:G	T:T	C:C	G:G	G:G	A:A	G:G	G:G	T:C	T:T	T:T	G:G	A:A	A:A	C:T	T:T	G:G	C:C	A:A	A:G	A:A	A:A	G:G	G:G	T:C	T:T	C:C	T:T	G:G	C:A	A:A	C:T	G:G	A:A	T:T	T:A	T:T	G:G	T:T	A:G	A:G	G:G	T:T	C:C
157	G-case_I-80	2017_GBS	test set	case	case	G:G	T:T	C:C	G:G	G:A	A:C	G:A	G:G	T:T	T:T	T:C	G:G	A:A	A:A	C:C	T:T	G:G	T:T	G:G	A:A	A:A	A:G	G:G	A:A	T:T	T:A	C:C	T:T	G:G	A:A	A:G	C:T	G:A	T:A	T:T	T:T	T:C	G:G	T:T	G:G	A:A	G:G	T:T	A:A
158	G-case_I-89	2017_GBS	test set	case	case	G:G	T:C	C:C	G:C	G:A	A:C	G:A	G:G	T:T	T:T	T:C	G:C	A:A	A:A	C:C	T:T	G:G	T:T	G:G	A:A	A:A	A:G	G:G	G:G	T:T	T:T	C:C	T:T	G:G	C:C	A:A	C:T	G:G	A:A	T:T	T:T	T:C	G:G	T:T	A:G	A:A	G:G	T:T	A:A
159	G-case_I-9	2017_GBS	train set	case	case	G:G	T:T	C:C	G:G	G:A	A:C	G:A	G:T	T:C	T:T	T:T	G:G	A:A	A:A	C:T	T:T	G:G	C:T	A:G	A:A	A:A	A:A	G:G	G:G	T:C	T:T	C:T	T:T	G:G	C:A	A:A	T:T	G:G	T:A	T:T	T:A	C:C	G:G	T:T	G:G	A:A	G:G	T:T	C:C
160	G-case_I-90	2017_GBS	test set	case	case	G:G	T:T	C:C	G:G	G:A	A:C	G:A	G:T	T:C	T:T	T:T	G:G	A:A	A:A	C:C	T:T	G:G	C:C	A:A	A:A	A:A	A:A	G:G	G:G	T:C	T:T	C:C	T:T	G:G	C:C	A:A	T:T	G:G	T:A	T:T	T:T	C:C	G:G	T:T	A:G	A:A	G:G	T:T	A:C
161	G-case_I-91	2017_GBS	test set	case	case	G:G	T:T	C:C	G:G	G:G	A:A	G:G	G:G	T:T	T:T	T:C	G:G	A:A	G:A	T:T	T:T	G:T	C:T	A:G	A:A	A:A	A:G	G:G	G:A	T:C	T:T	C:C	T:T	G:G	C:A	A:A	C:T	G:G	A:A	T:T	T:T	T:C	G:G	T:T	G:G	A:G	G:G	T:T	A:A
162	G-case_I-92	2017_GBS	train set	case	case	G:G	T:T	C:C	G:G	G:G	A:A	G:G	G:G	C:C	T:T	T:T	G:G	A:A	A:A	C:T	T:T	G:G	T:T	G:G	A:A	A:A	A:A	G:G	G:G	T:T	T:T	C:C	T:T	G:G	C:C	A:G	C:C	G:G	T:T	T:T	T:A	C:C	G:G	T:T	G:G	A:A	G:G	T:T	A:A
163	G-case_I-93	2017_GBS	train set	case	case	G:G	T:T	C:C	G:G	G:G	A:A	G:G	T:T	T:C	T:T	T:T	G:G	A:G	A:A	C:C	T:T	G:G	C:T	A:G	A:A	A:A	A:A	G:G	G:G	T:T	T:T	C:C	T:T	G:G	C:C	A:G	T:T	G:A	T:T	T:T	T:A	C:C	G:G	T:T	No Call	A:G	G:G	T:T	A:C
164	G-case_I-94	2017_GBS	train set	case	case	G:G	T:T	C:C	G:G	G:G	A:A	G:G	G:T	T:C	T:T	T:T	G:G	A:G	No Call	C:C	T:T	G:G	C:C	A:A	A:A	A:A	No Call	G:G	G:G	T:C	T:T	C:C	T:T	G:G	C:C	A:A	T:T	G:G	T:T	No Call	A:A	C:C	G:G	T:G	G:G	A:G	G:G	T:T	A:C
165	G-case_I-95	2017_GBS	train set	case	case	G:G	T:T	C:C	G:G	G:G	A:A	G:G	G:T	C:C	T:T	T:T	G:G	A:A	G:A	C:C	T:T	G:G	C:T	A:G	A:A	A:A	A:A	G:G	G:G	T:C	T:T	C:C	T:T	G:G	C:C	A:G	T:T	G:G	A:A	T:T	A:A	C:C	G:G	T:T	A:A	A:A	G:G	T:T	A:C
166	G-case_I-96	2017_GBS	train set	case	case	G:G	C:C	C:C	G:C	G:A	A:C	G:A	G:G	T:C	T:T	T:T	G:G	A:A	A:A	C:C	T:T	G:G	C:C	A:A	A:A	A:A	A:G	G:G	G:G	T:C	T:T	C:C	T:T	G:G	C:C	A:G	C:T	G:G	A:A	No Call	T:T	T:C	G:G	T:T	G:G	A:A	G:G	T:T	A:A
167	G-case_I-97	2017_GBS	train set	case	case	G:G	T:T	C:C	G:G	G:A	A:C	G:A	G:G	C:C	T:T	T:T	G:G	A:G	G:G	C:C	T:T	G:G	T:T	G:G	A:A	A:A	A:A	G:G	G:G	T:C	T:T	C:C	T:T	G:G	No Call	A:A	T:T	G:G	T:T	T:T	A:A	C:C	G:G	T:T	A:G	A:A	G:G	T:T	A:A
168	G-case_I-98	2017_GBS	train set	case	case	G:G	T:T	C:C	G:G	G:A	A:C	G:A	G:G	T:C	T:T	T:T	G:G	A:A	A:A	C:T	T:T	G:G	C:C	A:A	A:A	A:A	A:A	G:G	G:G	T:C	T:T	C:C	T:T	G:G	C:A	A:G	T:T	G:G	T:A	T:T	T:A	C:C	G:G	T:T	G:G	A:A	G:G	T:T	A:A
169	G-case_I-99	2017_GBS	train set	case	case	G:G	T:C	C:C	G:G	G:A	A:C	G:A	G:G	T:C	T:T	T:T	G:G	A:A	A:A	C:T	T:T	G:T	C:C	A:A	A:A	A:A	A:G	G:G	G:A	T:C	T:T	C:C	T:T	G:G	A:A	A:G	C:T	G:A	T:A	T:C	T:A	T:C	G:G	T:T	A:G	A:A	G:G	T:T	A:C
170	G-control_I-43	2017_GBS	train set	control	control	G:G	T:C	C:C	G:G	G:G	A:A	G:G	T:T	T:T	T:T	T:T	G:G	A:A	A:A	C:C	T:T	G:T	T:T	G:G	A:A	A:A	A:A	G:G	G:A	T:T	T:T	C:C	T:T	G:G	C:A	A:A	C:T	G:G	A:A	T:T	T:A	T:C	G:G	T:T	No Call	A:A	G:G	T:C	A:C
171	G-control_I-45	2017_GBS	train set	control	control	G:G	T:T	T:T	G:G	G:G	A:A	G:G	G:G	C:C	T:T	T:T	G:G	A:A	A:A	C:C	T:T	G:G	No Call	No Call	A:A	A:A	A:A	G:G	G:A	T:T	T:T	C:C	T:T	G:G	C:A	A:G	C:C	G:G	A:A	T:T	A:A	C:C	G:G	T:T	No Call	A:A	G:G	T:T	A:C
172	G-control_I-46	2017_GBS	train set	control	control	No Call	T:T	T:T	G:G	G:G	A:A	G:G	G:T	T:C	T:T	T:T	G:G	A:G	A:A	C:C	T:T	G:G	C:C	A:A	A:G	A:A	A:A	G:G	G:G	C:C	T:A	C:T	T:G	G:G	C:C	A:G	T:T	G:G	T:T	T:T	A:A	C:C	G:T	T:G	G:G	A:A	G:G	T:T	C:C
173	G-control_I-47	2017_GBS	train set	control	control	G:G	T:T	C:C	G:G	G:G	A:A	G:G	G:T	C:C	T:T	T:T	G:G	A:A	A:A	C:C	T:T	G:G	C:C	A:A	A:A	A:T	A:A	G:G	G:G	C:C	T:T	C:C	T:G	G:G	No Call	A:G	T:T	G:G	T:T	No Call	A:A	C:C	G:G	T:T	A:A	A:G	G:G	T:C	A:A
174	G-control_I-48	2017_GBS	train set	control	control	G:G	T:T	C:C	G:G	No Call	No Call	No Call	G:G	T:C	T:T	T:T	G:G	A:A	A:A	C:C	T:T	G:G	T:T	G:G	A:A	A:A	A:A	G:G	G:G	T:T	T:T	C:C	T:T	G:G	No Call	A:A	T:T	G:G	T:A	T:T	T:T	C:C	G:T	T:T	A:A	A:G	G:G	T:T	A:C
175	G-control_I-49	2017_GBS	train set	control	control	No Call	T:T	No Call	G:G	G:G	A:A	G:G	G:T	T:C	T:C	T:T	G:G	A:A	A:A	C:C	T:T	G:G	C:C	A:A	A:A	A:A	A:A	G:G	G:G	C:C	T:T	C:T	T:T	G:G	C:C	A:G	T:T	G:G	T:A	T:T	A:A	C:C	G:G	T:T	A:A	G:G	G:G	T:T	C:C
176	G-control_I-50	2017_GBS	train set	control	control	G:G	No Call	C:C	No Call	No Call	A:A	G:G	G:T	T:C	T:T	T:T	G:G	A:G	No Call	No Call	T:T	G:G	C:C	A:A	A:G	A:T	No Call	G:G	G:G	C:C	T:T	C:C	T:T	G:G	C:C	A:G	C:T	G:G	T:T	No Call	A:A	T:C	G:G	T:T	No Call	A:A	G:G	T:T	A:A
177	G-control_I-51	2017_GBS	train set	control	control	G:T	No Call	C:T	G:G	G:G	A:A	G:G	G:T	T:T	T:T	T:T	G:G	A:A	A:A	C:C	T:T	G:G	C:C	A:A	G:G	A:T	A:A	G:G	G:G	C:C	T:T	C:C	T:T	G:G	No Call	A:G	T:T	G:G	A:A	T:T	T:A	C:C	G:G	T:T	No Call	A:G	G:G	T:C	A:C
178	G-control_I-52	2017_GBS	train set	control	control	G:G	T:T	C:C	G:G	G:G	A:A	G:G	G:G	T:C	T:T	T:T	G:G	A:A	G:G	C:C	No Call	G:G	C:C	A:A	A:A	A:T	A:A	G:G	G:G	C:C	T:T	C:C	T:T	G:G	C:C	A:G	C:T	G:G	T:T	No Call	T:A	T:C	G:G	T:T	G:G	A:A	G:G	T:T	A:C
179	G-control_I-53	2017_GBS	train set	control	control	G:T	T:T	C:C	G:G	G:G	No Call	No Call	G:G	C:C	T:T	No Call	G:G	A:G	G:A	C:C	T:T	G:G	C:C	A:A	A:G	A:A	A:A	G:G	G:G	C:C	T:T	C:C	T:T	G:G	C:C	G:G	T:T	G:G	T:A	T:T	A:A	C:C	G:G	T:T	G:G	A:A	G:G	T:T	A:C
180	G-control_I-54	2017_GBS	train set	control	control	G:G	T:T	C:C	G:G	G:G	A:A	G:G	G:T	T:T	T:T	T:T	G:G	A:A	A:A	C:C	T:T	G:G	C:C	A:A	A:A	A:A	A:A	G:G	G:G	C:C	T:T	C:C	T:T	G:G	C:C	A:G	T:T	G:A	T:T	No Call	T:A	C:C	G:G	T:G	G:G	A:A	G:G	T:T	A:C
181	G-control_I-55	2017_GBS	train set	control	control	G:G	T:T	C:C	No Call	G:G	A:A	G:G	G:G	T:C	T:T	T:T	G:G	G:G	A:A	C:C	No Call	G:G	C:C	A:A	A:A	A:A	A:A	G:G	G:A	T:C	T:A	C:T	T:G	G:G	C:C	A:A	C:C	G:G	T:T	T:T	T:A	T:C	G:G	T:T	G:G	A:A	G:G	T:T	A:C
182	G-control_I-56	2017_GBS	train set	control	control	G:G	T:T	C:C	G:C	G:G	A:A	G:G	G:G	T:T	T:T	T:T	G:G	A:G	A:A	C:C	T:T	G:G	C:C	A:A	A:A	A:A	A:G	G:G	G:G	T:C	T:T	C:C	T:T	G:G	C:A	A:A	C:C	G:G	T:T	T:T	T:A	T:C	G:G	T:T	A:G	A:A	G:G	T:T	A:C
183	G-control_I-57	2017_GBS	train set	control	control	G:G	T:T	C:C	G:G	G:G	A:A	G:G	G:G	T:C	T:T	T:T	G:G	A:G	No Call	C:C	T:T	G:G	C:C	A:A	A:A	A:A	A:A	G:G	G:G	T:C	T:T	C:C	T:G	G:G	C:C	G:G	T:T	G:G	T:T	T:T	T:A	C:C	G:G	T:T	G:G	A:A	G:G	T:T	C:C
184	G-control_I-58	2017_GBS	train set	control	control	G:G	T:T	C:C	G:C	G:G	A:A	G:G	G:G	T:T	T:T	T:T	G:G	A:A	A:A	C:C	No Call	G:G	T:T	G:G	A:A	A:A	A:A	G:G	G:A	T:C	T:T	C:C	T:T	G:G	No Call	A:A	C:C	G:G	A:A	T:T	T:T	T:T	G:G	T:T	A:A	A:A	G:G	T:C	A:A
185	G-control_I-59	2017_GBS	train set	control	control	G:G	No Call	C:C	G:G	G:G	A:A	G:G	G:G	T:T	T:T	T:T	G:G	A:A	G:A	C:C	No Call	G:G	C:C	A:A	A:A	T:T	A:A	G:G	G:G	T:C	T:T	C:T	T:T	G:G	C:C	A:G	T:T	G:G	T:A	T:T	A:A	C:C	G:G	T:T	A:A	A:A	G:G	T:C	C:C
186	G-control_I-60	2017_GBS	train set	control	control	G:G	T:T	C:C	G:G	G:G	No Call	No Call	G:G	T:C	T:T	T:T	G:G	A:A	A:A	C:C	T:T	G:G	C:C	A:A	A:A	A:A	A:A	G:G	G:G	T:C	T:T	C:T	T:T	G:G	C:C	A:A	C:C	G:G	No Call	T:T	T:T	T:C	G:G	T:T	A:A	A:A	G:G	T:C	A:A
187	G-control_I-61	2017_GBS	train set	control	control	G:T	T:T	C:C	No Call	G:A	A:C	G:A	G:G	C:C	T:T	T:T	G:G	A:G	G:A	C:C	T:T	G:G	C:C	A:A	G:G	A:T	A:A	G:G	G:G	C:C	T:T	C:T	T:G	G:G	C:C	A:G	T:T	G:G	T:A	T:T	T:A	C:C	G:T	T:T	G:G	A:A	G:G	T:C	A:C
188	G-control_I-62	2017_GBS	train set	control	control	G:G	T:T	C:C	G:G	G:G	A:A	G:G	G:T	C:C	T:T	T:T	No Call	A:G	G:A	C:C	T:T	G:G	C:C	A:A	A:G	A:A	A:A	G:G	G:G	T:C	T:T	C:T	T:G	G:G	C:C	A:G	T:T	G:G	T:A	T:T	A:A	C:C	G:T	T:T	A:A	A:A	G:G	C:C	A:C
189	G-control_I-63	2017_GBS	train set	control	control	G:G	T:T	C:C	G:G	G:G	A:A	G:G	G:T	C:C	T:T	T:T	G:G	A:G	No Call	C:T	No Call	G:G	C:C	A:A	A:G	T:T	A:A	G:G	G:G	T:C	T:T	C:T	T:T	G:G	C:A	A:G	T:T	G:G	T:T	T:T	A:A	C:C	G:G	T:T	A:G	A:G	G:G	T:T	A:C
190	G-control_I-64	2017_GBS	train set	control	control	G:G	T:C	C:C	G:G	A:A	C:C	A:A	G:G	T:T	T:T	T:T	G:G	A:G	G:A	No Call	T:T	G:G	C:C	A:A	A:G	A:A	A:G	G:G	G:G	C:C	T:T	C:C	T:T	G:G	No Call	A:A	C:T	G:G	No Call	T:T	T:T	T:C	G:G	T:T	A:G	A:G	G:G	T:T	A:A
191	G-control_I-65	2017_GBS	train set	control	control	G:G	T:T	C:T	G:G	No Call	No Call	No Call	G:G	T:T	T:T	T:T	G:G	A:G	G:A	C:C	T:T	G:G	C:C	A:A	A:A	A:T	A:A	G:G	G:G	C:C	T:T	C:T	T:G	G:G	C:A	A:G	T:T	G:G	T:T	T:T	A:A	C:C	G:T	T:T	A:A	A:A	G:G	T:C	A:C
192	G-control_I-66	2017_GBS	train set	control	control	G:T	T:T	C:C	G:G	G:G	A:A	G:G	G:G	T:C	T:T	T:T	G:G	A:G	G:A	C:C	T:T	G:G	C:C	A:A	A:A	A:T	A:A	G:G	G:G	T:T	T:A	C:C	T:T	G:G	C:C	G:G	T:T	G:G	T:A	T:T	A:A	C:C	G:G	T:T	No Call	A:A	G:G	T:T	C:C
193	G-control_I-67	2017_GBS	train set	control	control	No Call	T:T	C:C	G:G	G:G	A:A	G:G	G:T	T:C	T:T	T:T	G:G	A:G	G:A	C:C	T:T	G:G	C:C	A:A	A:G	A:A	A:A	G:G	G:G	C:C	T:T	C:C	T:T	G:G	C:C	A:G	T:T	G:A	T:A	T:T	A:A	C:C	G:G	T:T	No Call	A:A	G:G	T:T	C:C
194	G-control_I-68	2017_GBS	train set	control	control	G:G	T:T	C:C	G:G	G:G	A:A	G:G	G:G	T:C	T:T	T:T	G:G	A:G	G:A	C:C	T:T	G:G	C:C	A:A	A:G	A:T	A:A	G:G	G:G	C:C	T:T	C:C	T:T	G:G	C:C	A:G	C:T	G:G	T:T	T:T	A:A	T:C	G:G	T:T	A:G	A:A	G:G	T:T	A:C
195	G-control_I-69	2017_GBS	train set	control	control	G:G	T:T	C:C	G:G	G:G	A:A	G:G	G:G	T:T	T:T	T:T	G:G	A:G	G:A	C:T	T:T	G:G	C:C	A:A	A:A	A:A	A:A	G:G	G:G	No Call	T:T	C:C	T:T	G:G	C:C	A:G	C:C	G:G	T:T	T:T	T:A	T:C	G:G	T:T	G:G	A:G	G:G	T:T	A:C
196	G-control_I-70	2017_GBS	train set	control	control	No Call	T:T	C:C	G:G	G:G	A:A	G:G	G:T	T:T	T:T	T:T	G:G	A:A	A:A	C:C	No Call	G:G	C:T	A:G	A:G	A:A	A:A	G:G	G:G	T:T	T:T	C:C	T:T	G:G	C:C	A:A	T:T	G:A	T:T	T:T	T:A	T:C	G:G	T:G	G:G	G:G	G:G	T:T	C:C
197	G-control_I-71	2017_GBS	train set	control	control	G:T	T:T	C:T	G:G	No Call	No Call	No Call	G:G	T:C	T:T	T:T	G:G	A:G	G:A	No Call	T:T	G:G	C:C	A:A	A:A	A:A	A:A	G:G	G:G	T:T	T:T	C:C	T:T	G:G	A:A	A:A	C:T	G:A	T:A	T:T	A:A	C:C	G:G	T:T	A:G	A:A	G:G	T:T	A:C
198	G-control_I-72	2017_GBS	train set	control	control	G:T	T:T	C:C	G:G	G:G	A:A	G:G	G:G	C:C	T:T	T:T	G:G	A:A	G:G	C:C	T:T	G:G	C:T	A:G	A:A	A:A	A:A	G:G	G:G	T:C	T:T	C:T	T:T	G:G	C:C	A:G	T:T	G:G	T:T	T:T	A:A	C:C	G:G	T:T	A:G	A:G	G:G	T:T	A:C
199	G-control_I-73	2017_GBS	train set	control	control	G:G	T:T	C:T	G:G	G:G	A:A	G:G	G:T	C:C	T:T	T:T	G:G	A:G	A:A	C:C	T:T	G:G	C:T	A:G	A:G	A:A	A:A	G:G	G:G	T:C	T:T	C:C	T:G	G:G	C:C	A:A	T:T	G:G	T:T	T:T	A:A	C:C	G:T	T:T	A:A	A:A	G:G	T:C	C:C
200	G-control_I-74	2017_GBS	test set	control	control	G:G	T:T	C:C	G:G	G:G	A:A	G:G	G:T	T:C	T:T	T:T	G:G	A:G	G:G	C:C	T:T	G:G	C:C	A:A	A:A	A:T	A:A	G:G	G:G	C:C	T:T	C:C	T:T	G:G	C:C	A:A	T:T	G:G	No Call	T:T	A:A	C:C	G:G	T:T	No Call	A:A	G:G	T:T	C:C
201	G-control_I-75	2017_GBS	train set	control	control	G:G	T:T	C:C	G:G	G:A	A:C	G:A	G:T	T:C	T:T	T:T	G:G	A:G	G:G	T:T	T:T	G:G	C:C	A:A	A:G	A:A	A:A	G:G	G:G	C:C	T:A	C:T	T:G	G:G	C:A	A:G	T:T	G:G	T:T	No Call	A:A	C:C	G:G	T:T	A:A	A:G	G:G	T:T	A:C
202	G-control_I-76	2017_GBS	train set	control	control	G:G	T:T	C:C	G:G	G:G	A:A	G:G	G:G	C:C	T:T	T:T	G:G	A:A	G:A	No Call	No Call	G:G	C:C	A:A	A:G	A:A	A:A	G:G	G:G	C:C	T:T	C:C	T:T	G:G	C:C	G:G	T:T	G:G	T:T	T:T	A:A	C:C	G:G	T:T	No Call	A:A	G:G	T:T	C:C
203	G-control_I-77	2017_GBS	train set	control	control	G:G	T:T	C:T	G:G	G:G	No Call	G:G	G:G	C:C	T:T	T:T	G:G	A:G	A:A	C:C	T:T	G:G	C:C	A:A	A:G	A:T	A:A	G:G	G:G	C:C	T:A	C:C	T:G	G:G	No Call	A:G	T:T	G:G	T:T	T:T	A:A	C:C	G:T	T:T	No Call	A:A	G:G	T:C	C:C
204	G-control_I-78	2017_GBS	train set	control	control	G:T	T:T	C:T	G:G	G:G	A:A	G:G	G:T	T:C	T:T	T:T	G:G	A:A	G:A	C:C	T:T	G:G	C:C	A:A	A:A	A:A	A:A	G:G	G:G	T:C	T:T	C:C	T:G	G:G	C:C	A:A	C:T	G:G	T:T	T:T	A:A	T:C	G:T	T:T	G:G	A:A	G:G	T:T	A:C
205	G-control_I-79	2017_GBS	train set	control	control	G:G	T:T	C:C	G:G	G:G	A:A	G:G	T:T	C:C	T:T	T:T	G:G	A:A	A:A	C:C	T:T	G:G	C:C	A:A	A:A	A:T	A:A	G:G	G:G	C:C	T:T	C:T	G:G	G:G	C:C	A:G	T:T	G:G	T:T	T:T	A:A	C:C	T:T	T:T	A:G	A:G	G:G	T:C	C:C
206	G-control_I-80	2017_GBS	train set	control	control	G:G	T:T	C:C	G:G	G:G	A:A	G:G	G:G	T:T	T:T	T:T	G:G	A:G	A:A	T:T	No Call	G:G	C:C	A:A	A:A	A:A	A:A	G:G	G:G	T:T	T:T	C:C	T:T	G:G	A:A	A:A	C:T	G:G	T:A	T:T	A:A	T:C	G:G	T:T	A:A	A:A	G:G	T:T	A:C
207	G-control_I-81	2017_GBS	test set	control	control	G:G	T:T	C:T	G:G	G:G	A:A	G:G	G:T	T:C	T:T	T:T	G:G	A:G	A:A	C:C	T:T	G:G	C:C	A:A	A:A	A:A	A:A	G:G	G:G	C:C	T:T	C:C	T:G	G:G	C:C	A:A	T:T	G:G	T:A	No Call	A:A	C:C	G:T	T:T	A:A	A:A	G:G	T:T	A:C
208	G-control_I-82	2017_GBS	test set	control	control	No Call	T:T	C:T	G:G	G:G	A:A	G:G	G:T	C:C	T:T	T:T	G:G	A:G	G:A	C:C	T:T	G:G	C:C	A:A	A:A	A:T	A:A	G:G	G:G	C:C	T:T	C:T	T:T	G:G	C:C	A:A	T:T	G:G	A:A	C:C	T:A	C:C	G:G	T:T	A:A	A:A	G:G	T:C	C:C
209	G-control_I-83	2017_GBS	train set	control	control	G:T	T:T	C:C	G:G	G:G	A:A	G:G	G:T	T:T	T:T	T:T	G:G	A:A	A:A	C:C	T:T	G:G	C:C	A:A	A:G	A:A	A:G	G:G	G:G	T:C	T:T	C:C	T:T	G:G	C:C	A:G	T:T	G:A	T:A	T:T	T:A	C:C	G:G	T:G	G:G	A:A	G:G	T:T	A:C
210	G-control_I-84	2017_GBS	test set	control	control	G:G	T:T	C:C	G:G	No Call	No Call	No Call	G:G	C:C	T:T	T:T	G:G	A:A	A:A	C:C	No Call	G:G	C:C	A:A	A:A	A:A	A:A	G:G	G:G	C:C	T:T	C:C	T:G	G:G	C:C	A:A	C:T	G:G	T:T	T:T	A:A	C:C	G:T	T:T	A:G	A:A	G:G	T:C	A:C
211	G-control_I-85	2017_GBS	train set	control	control	G:T	T:T	C:C	G:G	G:G	A:A	G:G	G:G	C:C	T:T	T:T	No Call	A:G	G:A	C:C	T:T	G:G	C:C	A:A	G:G	A:A	A:A	G:G	G:G	C:C	T:T	C:T	T:G	G:G	C:C	A:G	T:T	G:G	T:T	T:T	A:A	C:C	G:T	T:T	A:G	A:A	G:G	T:C	A:C
212	G-control_I-86	2017_GBS	train set	control	control	G:G	T:T	T:T	G:G	G:G	A:A	G:G	G:G	T:C	T:T	T:T	G:G	A:G	G:A	C:C	No Call	G:G	C:T	A:G	A:G	A:T	A:A	G:G	G:G	T:C	T:T	C:C	T:G	G:G	C:A	G:G	C:T	G:G	T:T	T:T	A:A	T:C	G:T	T:T	No Call	A:A	G:G	T:C	C:C
213	G-control_I-87	2017_GBS	train set	control	control	G:T	T:T	T:T	G:G	G:G	A:A	G:G	G:G	T:C	T:T	T:T	G:G	A:G	A:A	C:T	T:T	G:G	C:C	A:A	A:A	A:A	A:A	G:G	G:G	C:C	T:T	C:C	T:T	G:G	C:C	A:A	C:C	G:G	T:T	T:T	T:T	C:C	G:G	T:T	G:G	A:A	G:G	T:T	A:C
214	G-control_I-88	2017_GBS	train set	control	control	G:G	T:T	C:C	C:C	No Call	A:A	G:G	G:G	T:C	T:T	T:C	G:G	A:A	A:A	No Call	T:T	G:G	C:C	A:A	A:A	A:T	A:G	G:G	G:G	C:C	T:T	C:T	T:T	G:G	C:C	A:A	C:C	G:G	T:T	T:T	T:T	T:T	G:G	T:T	A:A	A:A	G:G	T:T	A:C
215	G-control_I-89	2017_GBS	train set	control	control	G:G	T:T	C:C	G:G	No Call	No Call	G:G	G:T	T:C	T:T	T:T	G:G	A:A	A:A	C:C	T:T	G:G	C:C	A:A	A:A	A:T	A:A	G:G	G:G	T:C	T:T	C:T	T:T	G:G	C:C	A:G	T:T	G:G	T:T	T:T	T:T	C:C	G:G	T:T	No Call	A:A	G:G	T:T	A:C
216	G-control_I-90	2017_GBS	train set	control	control	G:G	T:T	C:C	G:G	G:G	A:A	G:G	G:G	T:C	T:T	T:T	G:G	A:A	G:A	C:C	T:T	G:G	C:T	A:G	A:A	T:T	A:A	G:G	G:G	C:C	T:T	C:C	T:T	G:G	C:C	G:G	C:T	G:G	T:T	T:T	A:A	T:C	G:G	T:T	G:G	A:A	G:G	T:T	A:A
217	G-control_I-91	2017_GBS	test set	control	control	G:G	T:T	C:C	G:G	G:G	A:A	G:G	G:T	T:T	T:T	T:T	G:G	A:A	G:G	C:C	T:T	G:G	C:C	A:A	A:A	A:T	A:A	G:G	G:G	C:C	T:T	C:C	T:T	G:G	C:C	A:A	T:T	G:G	T:T	T:T	T:A	C:C	G:G	T:T	A:A	A:A	G:G	T:T	A:C
218	G-control_I-92	2017_GBS	train set	control	control	G:T	No Call	C:C	G:G	G:G	A:A	G:G	G:G	C:C	T:T	T:T	G:G	A:G	A:A	C:T	T:T	G:G	C:C	A:A	A:A	A:A	A:A	G:G	G:G	T:C	T:T	C:C	T:T	G:G	C:C	A:A	C:T	G:G	T:T	T:T	T:T	C:C	G:G	T:T	A:G	A:A	G:G	T:T	C:C
219	G-control_I-93	2017_GBS	train set	control	control	G:T	No Call	C:C	G:G	G:G	A:A	G:G	G:G	C:C	T:T	T:T	G:G	A:G	A:A	C:C	T:T	G:G	C:C	A:A	A:A	A:A	A:A	G:G	G:G	T:C	T:T	C:C	T:T	G:G	C:A	A:A	T:T	G:G	T:T	T:T	A:A	C:C	G:G	T:T	No Call	A:G	G:G	T:T	A:C
220	G-control_I-94	2017_GBS	train set	control	control	G:G	T:T	C:C	G:G	G:G	A:A	G:G	G:G	T:T	T:T	T:T	G:G	A:A	A:A	C:C	T:T	G:G	C:C	A:A	A:A	A:A	A:A	G:G	G:G	T:T	T:T	C:C	T:T	G:G	No Call	A:G	C:C	G:A	A:A	T:T	T:A	T:C	G:G	T:T	No Call	A:A	G:G	T:T	C:C
221	G-control_I-95	2017_GBS	train set	control	control	G:G	T:T	C:C	G:G	G:G	A:A	G:G	G:T	C:C	T:T	T:T	G:G	G:G	A:A	C:C	T:T	G:G	C:C	A:A	A:A	A:A	A:A	G:G	G:G	C:C	T:T	C:C	T:T	G:G	A:A	A:G	T:T	G:G	T:T	No Call	A:A	C:C	G:G	T:T	No Call	A:A	G:G	T:C	C:C
222	G-control_I-96	2017_GBS	train set	control	control	G:G	T:T	C:C	G:G	G:G	A:A	G:G	G:G	T:C	T:T	T:T	G:G	A:A	G:A	C:C	No Call	G:G	C:T	A:G	A:A	A:A	A:A	G:G	G:G	T:C	T:T	C:C	T:T	G:G	C:C	A:G	C:C	G:G	T:A	T:T	T:A	T:T	G:G	T:T	A:G	A:A	G:G	T:T	A:C
223	G-control_I-97	2017_GBS	train set	control	control	G:G	T:T	C:C	G:G	G:G	A:A	G:G	G:G	T:C	T:T	T:T	G:G	A:A	A:A	C:C	T:T	G:G	C:C	A:A	A:A	A:A	A:A	G:G	G:G	C:C	T:T	C:C	T:T	G:G	C:C	A:G	T:T	G:G	T:T	T:T	A:A	C:C	G:G	T:T	A:G	A:A	G:G	T:T	C:C
224	G-control_I-98	2017_GBS	train set	control	control	G:T	T:T	C:T	G:G	G:G	A:A	G:G	G:G	T:C	T:T	T:T	G:G	A:A	G:G	C:C	T:T	G:G	C:T	A:G	A:G	T:T	A:A	G:G	G:G	No Call	T:T	C:C	T:T	G:G	C:C	A:A	T:T	G:G	T:T	T:T	T:A	C:C	G:G	T:T	A:A	A:A	G:G	T:T	A:C
225	G-control_I-1	2017_GBS	test set	control	control	G:G	T:T	C:T	No Call	G:G	A:A	G:G	G:G	T:C	T:T	T:T	G:G	A:G	G:A	C:C	No Call	G:G	No Call	No Call	A:A	A:T	A:G	G:G	G:A	T:T	T:T	C:C	T:T	G:G	C:A	A:G	C:T	G:G	T:A	T:T	A:A	T:C	G:T	T:T	A:G	A:G	G:G	T:T	A:C
226	G-control_I-10	2017_GBS	test set	control	control	G:G	T:T	C:C	G:G	G:G	A:A	G:G	No Call	T:C	T:T	T:T	G:G	A:A	A:A	C:C	No Call	G:G	C:T	A:G	A:G	A:T	A:A	G:G	G:G	C:C	T:T	C:C	T:G	G:G	C:C	A:A	T:T	G:G	T:A	T:T	A:A	C:C	G:T	T:T	A:A	A:A	G:G	T:T	A:C
227	G-control_I-100	2017_GBS	train set	control	control	G:G	T:T	C:C	G:G	G:G	A:A	G:G	G:G	T:C	T:T	T:T	G:G	A:A	G:A	No Call	T:T	G:G	C:T	A:G	A:G	A:A	A:A	G:G	G:G	T:C	T:T	C:C	T:T	G:G	C:C	A:G	C:T	G:G	T:T	T:T	A:A	T:C	G:G	T:T	A:G	A:A	G:G	T:T	A:C
228	G-control_I-11	2017_GBS	train set	control	control	G:G	T:T	C:C	G:G	G:G	A:A	G:G	G:G	T:C	T:T	T:T	G:G	A:A	A:A	C:C	T:T	G:G	C:C	A:A	A:A	A:T	A:A	G:G	G:G	C:C	T:A	C:T	T:T	G:G	C:C	A:G	T:T	G:A	T:T	T:T	T:T	C:C	G:G	T:G	G:G	A:G	G:G	T:T	A:A
229	G-control_I-12	2017_GBS	train set	control	control	G:G	T:C	C:C	G:G	G:A	A:C	G:A	G:G	T:T	T:T	T:T	G:C	A:G	G:A	C:T	T:T	G:T	C:T	A:G	A:A	A:A	A:G	G:G	G:G	T:C	T:T	C:C	T:T	G:G	C:C	A:A	C:T	G:G	A:A	T:T	T:T	T:C	G:G	T:T	A:G	A:A	G:G	T:T	A:C
230	G-control_I-13	2017_GBS	test set	control	control	No Call	T:T	C:C	G:G	G:A	A:C	G:A	G:T	T:C	T:C	T:T	G:G	A:A	G:G	C:C	T:T	G:G	C:C	A:A	A:G	A:A	A:A	G:G	G:G	C:C	T:T	C:T	T:T	G:G	A:A	A:G	T:T	G:G	T:T	T:T	A:A	C:C	G:G	T:T	No Call	A:G	G:G	T:T	C:C
231	G-control_I-14	2017_GBS	test set	control	control	G:T	T:T	C:C	G:G	G:G	A:A	G:G	G:T	C:C	T:T	T:T	G:G	A:A	G:A	C:C	T:T	G:G	C:C	A:A	A:A	T:T	A:A	G:G	G:G	C:C	T:T	C:T	T:T	G:G	C:C	G:G	T:T	G:G	A:A	T:T	T:A	C:C	G:G	T:T	G:G	A:A	G:G	T:T	A:C
232	G-control_I-15	2017_GBS	train set	control	control	G:G	T:T	C:C	G:G	G:A	A:C	G:A	G:T	C:C	T:T	T:T	G:G	A:A	G:A	C:C	No Call	G:G	C:C	A:A	A:A	A:T	A:A	G:G	G:G	T:C	T:T	C:C	T:T	G:G	C:C	A:G	T:T	G:A	T:A	T:T	A:A	C:C	G:G	T:T	A:G	A:A	G:G	T:C	A:C
233	G-control_I-16	2017_GBS	train set	control	control	G:T	T:T	C:C	G:G	G:A	A:C	G:A	G:T	C:C	T:T	T:T	G:G	A:A	G:G	C:T	T:T	G:G	C:T	A:G	A:A	A:A	A:A	G:G	G:G	T:C	T:T	C:C	T:T	G:G	C:C	A:G	C:T	G:G	A:A	T:T	T:T	T:C	G:G	T:T	G:G	A:A	G:G	T:T	A:C
234	G-control_I-17	2017_GBS	train set	control	control	G:G	T:T	C:C	G:G	G:G	A:A	G:G	G:G	T:C	T:T	T:T	G:G	A:G	G:A	T:T	T:C	G:G	C:C	A:A	A:A	A:A	A:A	G:G	G:G	T:C	T:T	C:C	T:T	G:G	C:A	A:A	T:T	G:G	T:T	T:T	A:A	C:C	G:G	T:T	A:G	A:A	G:G	T:T	A:C
235	G-control_I-18	2017_GBS	train set	control	control	G:G	T:T	C:C	G:G	G:G	A:A	G:G	T:T	C:C	T:T	T:T	G:G	A:A	A:A	C:C	T:T	G:G	C:C	A:A	A:G	A:A	A:A	G:G	G:G	C:C	T:T	T:T	T:G	G:G	C:C	A:A	T:T	G:G	T:T	T:T	A:A	C:C	T:T	T:T	A:G	A:A	G:G	T:C	C:C
236	G-control_I-19	2017_GBS	train set	control	control	G:G	T:T	C:C	G:G	G:G	A:A	G:G	G:T	T:C	T:T	T:T	G:G	A:A	G:A	C:C	No Call	G:G	C:T	A:G	A:A	A:A	A:A	G:G	G:G	T:C	T:T	C:T	T:T	G:G	C:C	A:G	T:T	G:G	No Call	No Call	T:A	C:C	G:G	T:T	A:G	A:A	G:G	T:T	A:C
237	G-control_I-20	2017_GBS	train set	control	control	G:G	T:T	C:C	G:G	G:G	A:A	G:G	G:G	T:C	T:T	T:T	G:G	A:A	G:A	C:T	No Call	G:G	C:C	A:A	A:A	A:A	A:A	G:G	G:G	T:C	T:T	C:C	T:T	G:G	C:C	A:A	T:T	G:G	T:T	T:T	A:A	T:C	G:G	T:T	A:G	A:G	G:G	T:T	A:C
238	G-control_I-21	2017_GBS	train set	control	control	G:G	T:T	C:C	G:G	G:G	A:A	G:G	G:G	T:T	T:T	T:T	G:G	A:A	G:G	C:C	No Call	G:G	C:C	A:A	A:A	A:A	A:A	G:G	G:G	C:C	T:T	C:C	T:T	G:G	C:A	A:G	C:T	G:G	A:A	No Call	T:A	T:C	G:G	T:T	A:G	A:G	G:G	T:T	A:A
239	G-control_I-22	2017_GBS	test set	control	control	G:G	T:T	C:C	G:G	G:G	A:A	G:G	T:T	T:T	T:T	T:T	G:G	A:A	G:A	C:T	T:T	G:G	C:C	A:A	A:A	A:T	A:A	G:G	G:G	C:C	T:T	C:C	T:G	G:G	C:C	A:G	T:T	G:G	T:A	T:T	A:A	C:C	G:G	T:T	A:A	A:A	G:G	T:T	A:A
240	G-control_I-23	2017_GBS	test set	control	case	No Call	T:T	C:C	C:C	G:A	A:C	G:A	G:T	C:C	T:T	T:T	G:G	A:G	G:A	C:C	T:T	G:G	C:T	A:G	A:A	A:T	A:A	G:G	G:G	T:T	T:T	C:C	T:T	G:G	C:C	A:A	T:T	G:G	T:A	T:T	T:A	C:C	G:G	T:T	A:A	A:G	G:G	T:T	A:C
241	G-control_I-24	2017_GBS	train set	control	control	G:G	T:T	C:C	G:G	G:G	A:A	G:G	G:G	T:T	T:T	T:T	G:G	A:A	G:A	C:C	T:T	G:G	C:C	A:A	A:A	A:A	A:G	G:G	G:G	T:T	T:T	C:C	T:T	G:G	C:C	A:A	T:T	G:G	T:T	T:T	T:T	C:C	G:T	T:T	G:G	A:G	G:G	T:T	No Call
242	G-control_I-25	2017_GBS	train set	control	control	G:G	T:T	C:C	G:G	G:G	A:A	G:G	G:T	T:T	T:T	T:T	G:G	A:A	G:A	C:C	T:T	G:G	C:C	A:A	A:A	T:T	A:A	G:G	G:G	C:C	T:T	C:T	T:T	G:G	C:C	A:G	T:T	A:A	T:A	T:T	T:A	C:C	G:G	T:G	A:G	A:A	G:G	T:T	No Call
243	G-control_I-26	2017_GBS	train set	control	control	G:G	T:T	C:T	G:G	G:G	A:A	G:G	T:T	T:C	T:T	T:T	G:G	A:G	A:A	C:C	T:T	G:G	C:C	A:A	A:A	A:T	A:A	G:G	G:G	C:C	T:T	C:T	T:G	G:G	C:C	G:G	T:T	G:G	T:A	T:T	T:A	C:C	T:T	T:T	A:G	A:G	G:G	T:T	C:C
244	G-control_I-27	2017_GBS	train set	control	control	G:T	T:T	C:C	G:G	G:G	A:A	G:G	G:T	T:T	T:T	T:T	G:G	A:A	G:A	C:C	T:T	G:G	C:T	A:G	A:A	A:A	A:A	G:G	G:G	T:C	T:T	C:C	T:T	G:G	C:C	A:A	C:C	G:G	T:A	T:T	T:A	T:C	G:G	T:T	A:G	G:G	G:G	T:T	C:C
245	G-control_I-28	2017_GBS	train set	control	control	G:G	T:T	C:C	G:G	G:A	A:C	G:A	G:T	T:T	T:T	T:T	G:G	A:A	G:A	C:C	T:T	G:G	C:T	A:G	A:A	A:T	A:A	G:G	G:G	T:C	T:T	C:C	T:G	G:G	C:C	A:G	T:T	G:G	T:T	No Call	A:A	C:C	G:G	T:T	G:G	A:A	G:G	T:T	A:C
246	G-control_I-29	2017_GBS	train set	control	control	No Call	T:T	C:C	G:G	G:G	A:A	G:G	G:G	C:C	T:T	T:T	G:G	G:G	G:A	C:C	T:T	G:G	C:C	A:A	A:A	A:A	A:A	G:G	G:G	T:T	T:T	C:T	T:G	G:G	C:A	A:G	T:T	G:A	T:A	T:T	T:A	C:C	No Call	T:T	G:G	A:G	G:G	T:T	C:C
247	G-control_I-3	2017_GBS	train set	control	control	G:G	T:T	C:C	G:G	G:G	A:A	G:G	G:G	C:C	T:T	T:T	G:G	A:G	G:A	C:C	T:T	G:G	C:C	A:A	A:G	A:A	A:A	G:G	G:G	C:C	T:T	C:T	T:T	G:G	C:C	G:G	C:T	G:G	T:A	No Call	T:A	T:C	G:G	T:T	A:G	A:G	G:G	T:T	A:C
248	G-control_I-30	2017_GBS	train set	control	control	G:T	T:T	C:C	G:G	G:G	A:A	G:G	G:T	T:T	T:T	T:T	G:G	A:A	A:A	C:C	T:T	G:G	C:T	A:G	A:A	A:T	A:A	G:G	G:G	T:T	T:T	C:C	T:T	G:G	C:A	A:G	C:T	G:A	T:A	T:T	T:A	C:C	G:G	T:T	A:G	A:A	G:G	T:C	C:C
249	G-control_I-31	2017_GBS	train set	control	control	G:G	T:T	C:C	G:G	G:G	A:A	G:G	T:T	C:C	T:T	T:T	G:G	A:G	A:A	C:C	T:T	G:G	C:C	A:A	A:G	A:T	A:A	G:G	G:G	C:C	T:T	C:T	T:G	G:G	C:C	A:G	T:T	G:G	T:T	T:T	T:A	C:C	G:T	T:T	A:G	A:A	G:G	T:C	A:C
250	G-control_I-32	2017_GBS	train set	control	control	G:G	T:T	C:T	No Call	No Call	No Call	No Call	G:G	T:C	T:T	T:T	G:G	G:G	A:A	C:C	T:T	G:G	C:C	A:A	A:A	A:T	A:A	G:G	G:G	C:C	T:T	T:T	T:G	G:G	C:A	A:G	T:T	G:G	T:T	T:T	T:A	No Call	T:T	T:T	G:G	A:G	G:G	T:T	C:C
251	G-control_I-33	2017_GBS	train set	control	control	G:G	T:T	C:T	G:G	G:G	A:A	G:G	G:G	T:C	T:T	T:T	G:G	A:G	A:A	C:C	T:T	G:G	C:C	A:A	A:A	A:A	A:A	G:G	G:G	C:C	T:T	C:C	T:T	G:G	C:C	G:G	C:T	G:A	No Call	No Call	T:A	T:C	G:G	T:T	A:G	A:A	G:G	T:T	C:C
252	G-control_I-34	2017_GBS	train set	control	control	G:T	T:T	C:C	G:G	No Call	No Call	No Call	G:T	C:C	T:T	T:T	G:G	A:G	A:A	C:C	T:T	G:G	C:C	A:A	A:A	A:A	A:A	G:G	G:G	T:C	T:T	C:T	T:G	G:G	C:C	A:G	T:T	G:G	T:T	T:T	A:A	C:C	G:T	T:T	A:G	A:G	G:G	T:C	A:C
253	G-control_I-35	2017_GBS	train set	control	control	G:G	T:T	C:C	G:G	G:A	A:C	G:A	G:G	T:T	T:T	T:T	G:G	A:A	G:G	C:T	T:T	G:G	C:T	A:G	A:A	A:A	A:A	G:G	G:G	T:T	T:T	C:C	T:T	G:G	A:A	A:G	T:T	G:G	T:A	T:T	A:A	C:C	G:G	T:T	A:G	A:A	G:G	T:T	A:C
254	G-control_I-36	2017_GBS	train set	control	control	G:G	T:T	C:C	G:G	G:G	A:A	No Call	G:T	C:C	T:T	T:T	G:G	A:A	No Call	C:C	T:T	G:G	C:C	A:A	G:G	A:A	A:A	G:G	G:G	C:C	T:T	C:T	T:G	G:G	C:C	A:A	T:T	G:G	T:T	T:T	T:A	C:C	G:T	T:T	A:G	A:A	G:G	T:C	A:C
255	G-control_I-37	2017_GBS	train set	control	control	G:G	T:T	C:C	G:C	G:G	A:A	G:G	T:T	T:C	T:T	T:T	G:G	A:A	G:G	No Call	T:T	G:T	C:T	A:G	A:G	A:A	A:G	G:G	G:G	T:C	T:T	C:C	T:T	G:G	C:C	A:G	C:T	G:A	T:T	T:T	T:A	T:C	G:G	T:T	G:G	A:G	G:G	T:T	A:C
256	G-control_I-38	2017_GBS	train set	control	control	G:G	T:T	C:C	G:G	G:G	A:A	G:G	G:T	T:T	T:T	T:T	G:G	A:A	G:G	C:T	T:T	G:G	C:T	A:G	A:A	A:A	A:A	G:G	G:G	T:C	T:T	C:C	T:T	G:G	C:C	A:G	T:T	G:G	T:T	T:T	A:A	C:C	G:G	T:T	G:G	A:A	G:G	T:T	A:A
257	G-control_I-39	2017_GBS	train set	control	control	G:G	T:T	C:T	G:G	No Call	No Call	No Call	G:G	T:C	T:T	T:T	G:G	A:A	A:A	C:C	T:T	G:G	C:C	A:A	A:A	A:A	A:A	G:G	G:G	C:C	T:T	C:T	T:G	G:G	No Call	A:A	T:T	G:G	T:T	T:T	A:A	C:C	G:T	T:T	A:A	A:G	G:G	T:C	A:C
258	G-control_I-40	2017_GBS	train set	control	control	G:T	T:T	C:T	G:G	G:G	A:A	G:G	G:T	T:C	T:T	T:T	G:G	A:G	G:G	C:C	T:T	G:G	C:C	A:A	A:A	A:A	A:A	G:G	G:G	C:C	T:T	C:T	T:G	G:G	C:C	A:G	T:T	G:G	T:T	T:T	T:A	C:C	G:T	T:G	A:A	A:A	G:G	T:T	C:C
259	G-control_I-41	2017_GBS	train set	control	control	G:G	T:T	C:C	G:G	G:G	A:A	G:G	T:T	C:C	T:T	T:T	G:G	A:A	A:A	No Call	T:T	G:G	No Call	No Call	A:A	A:T	A:A	G:G	G:G	T:T	T:T	C:C	T:T	G:G	C:C	A:G	C:T	G:G	T:A	T:T	A:A	T:T	G:G	T:T	A:G	A:A	G:G	T:T	A:C
260	G-control_I-42	2017_GBS	train set	control	control	G:G	T:T	C:T	G:G	G:G	A:A	G:G	G:G	T:C	T:T	T:T	G:G	A:G	G:G	C:C	T:T	G:G	C:T	A:G	A:G	A:T	A:A	G:G	G:G	T:C	T:T	C:T	T:G	G:G	C:A	G:G	T:T	G:G	T:A	T:T	A:A	C:C	G:T	T:T	G:G	A:G	G:G	T:T	C:C
261	G-control_I-7	2017_GBS	train set	control	control	G:G	T:T	C:C	G:G	G:G	A:A	G:G	G:G	T:C	T:T	T:T	G:G	A:G	A:A	C:C	T:T	G:G	C:C	A:A	A:A	A:A	A:A	G:G	G:G	T:T	T:T	C:C	T:T	G:G	A:A	A:G	No Call	G:G	T:A	T:T	A:A	T:C	G:G	T:T	A:G	A:A	G:G	T:T	A:A
262	G-control_I-8	2017_GBS	train set	control	control	G:G	T:T	C:C	G:G	G:G	A:A	G:G	G:T	C:C	T:T	T:T	G:G	A:G	A:A	C:C	T:T	G:G	C:C	A:A	A:A	A:T	A:A	G:G	G:G	T:T	T:T	C:T	T:G	G:G	C:C	A:G	T:T	G:G	A:A	T:T	T:T	C:C	G:G	T:T	A:G	A:A	G:G	C:C	A:C
263	G-control_I-99	2017_GBS	test set	control	case	G:G	T:T	C:T	G:G	G:G	A:A	G:G	G:G	C:C	T:T	T:T	G:G	A:A	G:A	C:T	T:T	G:G	C:C	A:A	A:A	A:A	A:A	G:G	G:G	No Call	T:T	C:C	T:T	G:G	A:A	A:A	C:T	G:G	T:T	T:T	T:A	T:C	G:G	T:T	G:G	A:G	G:G	T:T	C:C
264	HR_1_41	2019_1st	train set	case	case	G:G	T:T	C:C	G:G	G:G	A:A	G:G	G:T	T:C	T:C	T:C	G:G	A:A	A:A	C:C	T:T	G:G	C:C	A:G	A:A	A:A	A:A	G:A	G:G	C:C	T:T	C:C	T:T	G:G	C:A	A:A	T:C	G:G	T:A	T:C	A:A	C:T	G:G	T:T	G:A	A:G	G:G	T:C	C:C
265	HR_1_80	2019_1st	train set	case	case	G:G	T:T	C:C	G:G	G:G	A:A	G:G	G:T	T:C	T:C	C:C	G:G	A:G	A:A	C:C	T:T	G:G	C:C	A:G	A:A	A:A	A:A	G:A	G:G	C:C	T:T	C:C	T:T	G:G	C:C	A:A	T:C	G:G	T:T	T:C	A:A	C:T	G:G	T:T	G:G	A:A	G:G	T:C	A:C
266	HR_1_25	2019_1st	train set	case	case	G:G	T:T	C:C	G:G	G:G	A:A	G:G	G:G	T:C	T:C	T:T	G:G	A:A	A:A	C:C	T:T	G:G	C:C	A:G	A:A	A:A	A:A	G:A	G:G	C:T	T:A	C:C	T:T	G:G	C:C	A:A	T:C	G:G	A:A	T:C	T:T	C:T	G:G	T:T	G:G	A:A	G:G	T:C	C:C
267	HR_1_72	2019_1st	train set	case	case	G:G	T:T	C:T	G:G	G:G	A:A	G:G	G:G	T:C	T:C	T:T	G:G	A:A	A:A	C:C	T:T	G:G	C:C	A:G	A:A	A:A	A:A	G:A	G:G	C:T	T:A	C:C	T:T	G:G	C:A	A:A	T:C	G:G	T:A	T:C	A:T	C:T	G:G	T:T	G:G	A:A	G:A	T:C	A:C
268	HR_1_17	2019_1st	train set	case	case	G:G	T:T	C:C	G:G	G:G	A:A	G:G	G:G	T:C	T:C	T:T	G:G	A:A	A:A	T:T	T:T	G:G	C:C	A:G	A:A	A:A	A:A	G:A	G:G	C:T	T:T	C:C	T:T	G:A	C:A	A:A	T:C	G:G	T:T	T:C	A:T	C:T	G:G	T:T	G:G	A:A	G:A	T:C	A:C
269	HR_1_64	2019_1st	train set	case	case	G:G	T:T	C:T	G:G	G:G	A:A	G:G	G:G	T:C	T:C	T:T	G:G	A:A	A:A	C:C	T:T	G:G	C:C	A:G	A:A	A:A	A:G	G:A	G:G	T:T	T:A	C:C	T:T	G:A	C:C	A:A	T:T	G:G	T:T	T:C	A:T	C:C	G:G	T:T	A:A	A:A	G:G	T:C	A:C
270	HR_1_9	2019_1st	train set	case	case	G:G	T:T	C:C	G:G	G:G	A:A	G:G	G:T	T:C	T:C	T:T	G:G	A:A	A:A	C:C	T:T	G:G	C:C	A:G	A:A	A:A	A:A	G:A	G:G	C:T	T:T	C:C	T:T	G:G	C:C	A:A	T:C	G:G	T:T	T:C	A:A	C:T	G:G	T:T	G:A	A:A	G:G	T:C	C:C
271	HR_1_56	2019_1st	train set	case	case	G:G	T:T	C:C	G:G	G:G	A:A	G:G	G:G	T:C	T:C	T:T	G:G	A:A	A:A	C:C	T:T	G:G	C:C	A:G	A:A	A:A	A:A	G:A	G:A	C:T	T:T	C:C	T:T	G:G	C:C	A:A	T:C	G:G	T:T	T:C	A:A	C:T	G:G	T:T	G:A	A:A	G:G	T:C	A:C
272	HR_1_1	2019_1st	test set	case	control	G:G	T:T	C:C	G:G	G:G	A:A	G:G	G:G	T:T	T:C	T:T	G:G	A:A	A:A	C:C	T:T	G:G	C:C	A:G	A:A	A:A	A:G	G:A	G:A	C:T	T:T	C:C	T:T	G:G	C:A	A:A	T:C	G:G	A:A	T:C	A:T	C:C	G:G	T:G	G:G	A:A	G:G	T:C	A:A
273	HR_1_40	2019_1st	train set	case	case	G:G	T:T	C:C	G:G	G:G	A:A	G:G	G:G	T:T	T:C	T:T	G:G	A:A	A:A	C:C	T:T	G:G	C:C	A:G	A:A	A:A	A:G	G:A	G:G	C:T	T:T	C:C	T:T	G:G	C:C	A:A	T:T	G:G	T:T	T:C	A:A	C:C	G:T	T:T	A:A	A:A	G:G	T:C	C:C
274	HR_1_32	2019_1st	train set	case	case	G:G	T:T	C:C	G:C	G:G	A:A	G:G	G:T	T:C	T:C	T:T	G:G	A:A	A:A	C:T	T:T	G:G	C:C	A:G	A:A	A:A	A:A	G:A	G:G	C:C	T:T	C:C	T:T	G:G	C:C	A:A	T:T	G:G	T:A	T:C	A:T	C:C	G:G	T:T	A:A	A:A	A:A	T:C	A:C
275	HR_1_73	2019_1st	train set	case	case	G:G	T:T	C:T	G:G	G:G	A:A	G:G	G:G	T:C	T:C	T:T	G:G	A:A	A:G	C:C	T:T	G:G	C:C	A:G	A:A	A:A	A:G	G:A	G:G	C:T	T:A	C:C	T:T	G:G	C:A	A:G	T:T	G:G	T:A	T:C	A:T	C:C	G:G	T:T	G:G	A:G	G:G	T:C	C:C
276	HR_1_24	2019_1st	train set	case	case	G:G	T:T	C:C	G:G	G:G	A:A	G:G	G:G	T:C	T:C	T:T	G:G	A:A	A:A	C:C	T:T	G:G	C:C	A:G	A:A	A:A	A:A	G:A	G:G	C:C	T:A	C:C	T:T	G:G	C:A	A:G	T:C	G:G	T:A	T:C	A:T	C:T	G:G	T:T	G:G	A:A	G:G	T:C	A:A
277	HR_1_65	2019_1st	train set	case	case	G:G	T:T	T:T	G:G	G:G	A:A	G:G	G:G	T:C	T:C	T:T	G:G	A:A	A:A	C:C	T:T	G:G	C:C	A:G	A:A	A:A	A:G	G:A	G:A	T:T	T:T	C:C	T:T	G:A	C:C	A:A	T:T	G:G	T:T	T:C	T:T	C:C	G:G	T:T	A:A	A:A	G:G	T:C	A:A
278	HR_1_16	2019_1st	train set	case	case	G:G	T:T	C:C	G:G	G:G	A:A	G:G	G:G	T:C	T:C	T:T	G:G	A:A	A:A	C:C	T:T	G:G	C:C	A:G	A:A	A:A	A:A	G:A	G:G	T:T	T:A	C:C	T:T	G:A	C:C	A:A	T:T	G:G	T:A	T:C	A:T	C:C	G:G	T:T	G:G	A:A	G:G	T:C	A:C
279	HR_1_57	2019_1st	train set	case	case	G:G	T:T	C:C	G:G	G:G	A:A	G:G	G:G	T:T	T:C	T:T	G:G	A:G	A:A	C:C	T:T	G:G	C:C	A:G	A:A	A:A	A:A	G:A	G:A	C:C	T:T	C:C	T:T	G:G	C:A	A:A	T:C	G:G	T:T	T:C	A:A	C:T	G:G	T:T	G:A	A:G	G:G	T:C	A:C
280	HR_1_8	2019_1st	train set	case	case	G:G	T:T	C:C	G:G	G:G	A:A	G:G	G:G	T:C	T:C	T:T	G:G	A:A	A:A	C:C	T:T	G:G	C:C	A:G	A:A	A:A	A:G	G:A	G:G	C:C	T:A	C:C	T:T	G:G	C:A	A:A	T:T	G:G	T:A	T:C	T:T	C:C	G:G	T:T	G:G	A:G	G:A	T:C	C:C
281	HR_1_49	2019_1st	train set	case	case	G:G	T:T	C:C	G:G	G:G	A:A	G:G	G:G	T:C	T:C	T:T	G:G	A:A	A:A	C:C	T:T	G:G	C:C	A:G	A:A	A:A	A:G	G:A	G:G	T:T	T:T	C:C	T:T	G:A	C:A	A:A	T:C	G:G	T:A	T:C	A:T	C:T	G:T	T:T	G:G	A:A	G:G	T:C	A:C
282	HR_1_95	2019_1st	train set	case	case	G:G	T:T	C:C	G:G	G:G	A:A	G:G	G:T	T:C	T:C	C:C	G:G	A:G	A:A	C:C	T:T	G:G	C:C	A:G	A:A	A:A	A:A	G:A	G:G	C:C	T:T	C:C	T:T	G:G	C:A	A:A	T:C	G:G	T:T	T:C	A:A	C:T	G:G	T:T	G:G	A:G	G:G	T:C	C:C
283	HR_1_87	2019_1st	train set	case	case	G:G	T:T	C:C	G:G	G:G	A:A	G:G	G:G	T:C	T:C	T:T	G:G	A:A	A:A	C:C	T:T	G:G	C:C	A:G	A:A	A:A	A:G	G:A	G:G	C:T	T:T	C:C	T:T	G:G	C:A	A:G	T:T	G:G	T:A	T:C	A:T	C:C	G:G	T:T	G:G	A:G	G:A	T:C	A:C
284	HR_1_34	2019_1st	train set	case	case	G:G	T:T	C:C	G:G	G:G	A:A	G:G	G:G	T:C	T:C	T:T	G:G	A:A	A:A	C:C	T:T	G:G	C:C	A:G	A:A	A:A	A:G	G:A	G:G	C:C	T:A	C:C	T:T	G:G	C:C	A:G	T:T	G:G	T:A	T:C	T:T	C:C	G:G	T:T	G:G	A:A	G:A	T:C	A:C
285	HR_1_79	2019_1st	train set	case	case	G:G	T:T	C:C	G:G	G:G	A:A	G:G	G:G	T:C	T:C	T:C	G:G	A:G	A:A	C:C	T:T	G:G	C:C	A:G	A:A	A:A	A:A	G:A	G:A	C:T	T:T	C:C	T:T	G:G	C:A	A:A	T:C	G:G	T:A	T:C	A:A	C:T	G:G	T:T	G:G	A:A	G:G	T:C	A:C
286	HR_1_26	2019_1st	train set	case	case	G:G	T:T	C:C	G:G	G:G	A:A	G:G	G:G	T:C	T:C	T:T	G:G	A:A	A:A	C:C	T:T	G:G	C:C	A:G	A:A	A:A	A:A	G:A	G:A	C:C	T:T	C:C	T:T	G:G	C:A	A:A	T:C	G:G	T:T	T:C	A:A	C:T	G:G	T:T	G:G	A:A	G:G	T:C	A:A
287	HR_1_71	2019_1st	train set	case	case	G:G	T:T	C:C	G:G	G:G	A:A	G:G	G:G	T:C	T:C	T:T	G:G	A:A	A:A	T:T	T:T	G:G	C:C	A:G	A:A	A:A	A:A	G:A	G:G	C:T	T:T	C:C	T:T	G:A	C:A	A:A	T:C	G:G	T:T	T:C	A:A	C:T	G:G	T:T	A:A	A:A	G:A	T:C	A:C
288	HR_1_63	2019_1st	train set	case	case	G:G	T:T	C:T	G:G	G:G	A:A	G:G	G:G	T:C	T:C	T:T	G:G	A:A	A:A	C:C	T:T	G:G	C:C	A:G	A:A	A:A	A:A	G:A	G:G	C:C	T:T	C:C	T:T	G:G	C:A	A:G	T:C	G:G	T:A	T:C	A:T	C:T	G:G	T:T	G:G	A:A	G:A	T:C	A:A
289	HR_1_10	2019_1st	train set	case	case	G:G	T:T	C:C	G:G	G:G	A:A	G:G	G:T	T:C	T:C	C:C	G:G	A:A	A:A	C:C	T:T	G:G	C:C	A:G	A:A	A:A	A:A	G:A	G:G	C:C	T:T	C:C	T:T	G:G	C:C	A:A	T:C	G:G	A:A	T:C	A:A	C:T	G:G	T:T	G:A	A:A	G:G	T:C	A:C
290	HR_1_55	2019_1st	train set	case	case	G:G	T:T	C:C	G:G	G:G	A:A	G:G	G:G	T:T	T:C	T:T	G:G	A:A	A:A	C:C	T:T	G:G	C:C	A:G	A:A	A:A	A:G	G:A	G:G	C:T	T:T	C:C	T:T	G:G	C:A	A:A	T:T	G:G	A:A	T:C	A:T	C:C	G:G	T:T	G:G	A:A	G:G	T:C	A:A
291	HR_1_47	2019_1st	train set	case	case	G:G	T:T	C:C	G:G	G:G	A:A	G:G	G:T	T:C	T:C	T:C	G:G	A:A	A:A	C:C	T:T	G:G	C:C	A:G	A:A	A:A	A:A	G:A	G:G	C:C	T:T	C:C	T:T	G:G	C:A	A:A	T:C	G:G	T:A	T:C	A:A	C:T	G:G	T:T	G:A	A:G	G:G	T:C	C:C
292	HR_1_82	2019_1st	train set	case	case	G:G	T:T	C:C	G:G	G:G	A:A	G:G	G:G	T:C	T:C	C:C	G:G	A:G	A:A	C:C	T:T	G:G	C:C	A:G	A:A	A:A	A:A	G:A	G:A	C:C	T:T	C:C	T:T	G:G	C:A	A:A	T:C	G:G	T:A	T:C	A:A	C:T	G:G	T:T	G:G	A:A	G:G	T:C	A:A
293	HR_1_31	2019_1st	test set	case	case	G:G	T:T	C:C	G:G	G:G	A:A	G:G	G:G	T:C	T:C	T:T	G:G	A:A	A:A	C:C	T:T	G:G	C:C	A:G	A:A	A:A	A:A	G:A	G:A	C:C	T:T	C:C	T:T	G:G	C:A	A:A	T:C	G:G	T:T	T:C	A:A	C:T	G:G	T:T	G:G	A:A	G:G	T:C	A:C
294	HR_1_74	2019_1st	train set	case	case	G:G	T:T	C:C	G:G	G:G	A:A	G:G	G:G	T:C	T:C	T:T	G:G	A:A	A:A	C:C	T:T	G:G	C:C	A:G	A:A	A:A	A:A	G:A	G:G	C:C	T:A	C:C	T:T	G:G	C:C	A:G	T:T	G:G	T:A	T:C	T:T	C:C	G:G	T:T	G:G	A:G	G:G	T:C	C:C
295	HR_1_23	2019_1st	train set	case	case	G:G	T:T	C:C	G:G	G:G	A:A	G:G	G:G	T:C	T:C	T:C	G:G	A:G	A:A	C:C	T:T	G:G	C:C	A:G	A:A	A:A	A:A	G:A	G:A	C:T	T:T	C:C	T:T	G:G	C:A	A:A	T:C	G:G	A:A	T:C	A:A	C:T	G:G	T:T	G:G	A:G	G:G	T:C	C:C
296	HR_1_66	2019_1st	train set	case	case	G:G	T:T	C:C	G:G	G:G	A:A	G:G	G:G	T:T	T:C	T:C	G:G	A:A	A:A	C:C	T:T	G:G	C:C	A:G	A:A	A:A	A:A	G:A	G:A	C:T	T:T	C:C	T:T	G:G	C:A	A:A	T:C	G:G	T:A	T:C	A:A	C:T	G:G	T:T	G:G	A:G	G:G	T:C	A:C
297	HR_1_15	2019_1st	train set	case	case	G:G	T:T	C:C	G:G	G:G	A:A	G:G	G:G	T:C	T:C	T:T	G:G	A:A	A:A	C:C	T:T	G:G	C:C	A:G	A:A	A:A	A:A	G:A	G:G	C:T	T:T	C:C	T:T	G:A	C:C	A:A	T:C	G:G	T:T	T:C	A:T	C:T	G:T	T:T	A:A	A:A	G:G	T:C	C:C
298	HR_1_7	2019_1st	train set	case	case	G:G	T:T	C:C	G:G	G:G	A:A	G:G	G:T	T:C	T:C	T:T	G:G	A:A	A:A	C:C	T:T	G:G	C:C	A:G	A:A	A:A	A:A	G:A	G:G	C:C	T:T	C:C	T:T	G:G	C:C	A:A	T:C	G:G	T:T	T:C	A:A	C:T	G:G	T:T	G:A	A:A	G:G	T:C	A:C
299	HR_1_94	2019_1st	train set	case	case	G:G	T:T	C:T	G:G	G:G	A:A	G:G	G:G	T:C	T:C	T:T	G:G	A:A	A:A	C:C	T:T	G:G	C:C	A:G	A:A	A:A	A:G	G:A	G:G	C:T	T:T	C:C	T:T	G:G	C:C	A:G	T:C	G:G	A:A	T:C	T:T	C:T	G:G	T:T	G:G	A:G	G:G	T:C	A:C
300	HR_1_43	2019_1st	train set	case	case	G:G	T:T	C:C	G:G	G:G	A:A	G:G	G:G	T:C	T:C	T:T	G:G	A:A	A:A	C:C	T:T	G:G	C:C	A:G	A:A	A:A	A:A	G:A	G:G	C:T	T:T	C:C	T:T	G:G	C:C	A:A	T:T	G:G	A:A	T:C	A:A	C:C	G:G	T:T	A:A	A:A	G:G	T:C	A:C
301	HR_1_86	2019_1st	train set	case	case	G:G	T:T	T:T	G:G	G:G	A:A	G:G	G:G	T:C	T:C	T:T	G:G	A:A	A:A	C:C	T:T	G:G	C:C	A:G	A:A	A:A	A:G	G:A	G:A	T:T	T:A	C:C	T:T	G:A	C:C	A:A	T:T	G:G	T:T	T:C	T:T	C:C	G:G	T:T	A:A	A:A	G:G	T:C	A:C
302	HR_1_35	2019_1st	test set	case	case	G:G	T:T	C:C	G:G	G:G	A:A	G:G	G:T	T:C	T:C	T:T	G:G	A:A	A:A	C:C	T:T	G:G	C:C	G:G	A:A	A:A	A:A	G:A	G:G	C:T	T:T	C:C	T:T	G:G	C:C	A:A	T:T	G:G	T:A	T:C	A:A	C:C	G:G	T:G	A:A	A:A	G:A	T:C	A:C
303	HR_1_78	2019_1st	train set	case	case	G:G	T:T	C:C	G:G	G:G	A:A	G:G	G:G	T:C	T:C	T:T	G:G	A:A	A:A	C:C	T:T	G:G	C:C	A:G	A:A	A:A	A:G	G:A	G:G	C:C	T:A	C:C	T:T	G:G	C:C	A:G	T:T	G:G	A:A	T:C	A:T	C:C	G:G	T:T	G:G	A:A	G:A	T:C	A:C
304	HR_1_27	2019_1st	train set	case	case	G:G	T:T	C:C	G:G	G:G	A:A	G:G	G:G	T:C	T:C	T:T	G:G	A:A	A:G	C:C	T:T	G:G	C:C	A:G	A:A	A:A	A:A	G:A	G:G	C:C	T:T	C:C	T:T	G:G	C:A	A:G	T:T	G:G	A:A	T:C	A:T	C:C	G:G	T:T	G:G	A:A	G:A	T:C	A:A
305	HR_1_70	2019_1st	train set	case	case	G:G	T:T	T:T	G:G	G:G	A:A	G:G	G:G	T:C	T:C	T:T	G:G	A:A	A:A	C:C	T:T	G:G	C:C	A:G	A:A	A:A	A:G	G:A	G:G	T:T	T:T	C:C	T:T	G:G	C:A	A:A	T:T	G:G	T:A	T:C	A:A	C:C	G:G	T:T	G:G	A:A	G:G	T:C	A:A
306	HR_1_19	2019_1st	train set	case	case	G:G	T:T	T:T	G:G	G:G	A:A	G:G	G:G	T:C	T:C	T:T	G:G	A:A	A:A	C:C	T:T	G:G	C:C	A:G	A:A	A:A	G:G	G:A	G:G	T:T	T:A	C:C	T:T	G:G	C:C	A:A	T:T	G:A	T:T	T:C	A:T	C:C	G:G	T:T	G:G	A:A	G:G	T:C	C:C
307	HR_1_54	2019_1st	train set	case	case	G:G	T:T	C:C	G:G	G:G	A:A	G:G	G:G	T:C	T:C	T:T	G:G	A:G	A:A	C:C	T:T	G:G	C:C	A:G	A:A	A:A	A:A	G:A	G:A	C:T	T:T	C:C	T:T	G:G	C:C	A:A	T:C	G:G	T:A	T:C	A:A	C:T	G:G	T:T	G:A	A:A	G:G	T:C	C:C
308	HR_1_3	2019_1st	train set	case	case	G:G	T:T	C:C	G:G	G:G	A:A	G:G	G:G	T:C	T:C	T:T	G:G	A:A	A:A	C:C	T:T	G:G	C:C	A:G	A:A	A:A	A:A	G:A	G:G	C:T	T:A	C:C	T:T	G:G	C:A	A:G	T:C	G:G	T:A	T:C	A:T	C:T	G:G	T:T	G:G	A:G	G:A	T:C	A:C
309	HR_1_46	2019_1st	train set	case	case	G:G	T:T	C:C	G:G	G:G	A:A	G:G	G:G	T:C	T:C	T:T	G:G	A:A	A:A	T:T	T:T	G:G	C:C	A:G	A:A	A:A	A:G	G:A	G:G	T:T	T:T	C:C	T:T	G:G	C:C	A:A	T:T	G:G	T:T	T:C	A:A	C:C	G:G	T:T	A:A	A:A	G:A	T:C	A:A
310	HR_1_91	2019_1st	train set	case	case	G:G	T:T	C:C	G:G	G:G	A:A	G:G	G:T	T:C	T:C	T:C	G:G	A:A	A:A	C:C	T:T	G:G	C:C	A:G	A:A	A:A	A:A	G:A	G:G	C:T	T:T	C:C	T:T	G:G	C:A	A:A	T:C	G:G	T:T	T:C	A:A	C:T	G:G	T:T	G:A	A:A	G:G	T:C	A:C
311	HR_1_38	2019_1st	train set	case	case	G:G	T:T	C:C	G:G	G:G	A:A	G:G	G:G	T:C	T:C	T:T	G:G	A:A	A:A	C:C	T:T	G:G	C:C	A:G	A:A	A:A	A:A	G:A	G:G	C:T	T:A	C:C	T:T	G:G	C:C	A:G	T:C	G:G	A:A	T:C	T:T	C:T	G:G	T:T	G:G	A:A	G:A	T:C	A:C
312	HR_1_83	2019_1st	train set	case	case	G:G	T:T	C:C	G:G	G:G	A:A	G:G	G:G	T:C	T:C	T:T	G:G	A:A	A:A	C:C	T:T	G:G	C:C	A:G	A:A	A:A	A:G	G:A	G:G	C:T	T:T	C:C	T:T	G:G	C:C	A:A	T:C	G:G	T:T	T:C	A:T	C:T	G:G	T:T	A:A	A:A	G:A	T:C	A:C
313	HR_1_75	2019_1st	test set	case	case	G:G	T:T	C:C	G:G	G:G	A:A	G:G	G:G	T:C	T:C	T:T	G:G	A:G	A:A	C:C	T:T	G:G	C:C	A:G	A:A	A:A	A:A	G:A	G:A	C:C	T:T	C:C	T:T	G:G	C:A	A:A	T:C	G:G	T:A	T:C	A:A	C:T	G:G	T:T	G:A	A:A	G:G	T:C	A:C
314	HR_1_14	2019_1st	test set	case	case	G:G	T:T	C:C	C:C	G:G	A:A	G:G	G:T	T:C	T:C	T:T	G:G	A:G	A:A	C:C	T:T	G:G	C:C	A:G	A:A	A:A	A:A	G:A	G:G	C:T	T:T	C:C	T:T	G:G	C:C	A:A	T:C	G:G	A:A	T:C	A:A	C:C	G:G	T:G	A:A	A:A	G:A	T:C	C:C
315	HR_1_59	2019_1st	train set	case	case	G:G	T:T	C:C	G:G	G:G	A:A	G:G	G:G	T:C	T:C	T:T	G:G	A:A	A:A	C:C	T:T	G:G	C:C	A:G	A:A	A:A	A:A	G:A	G:G	C:T	T:T	C:C	T:T	G:A	C:A	A:A	T:T	G:G	A:A	T:C	A:A	C:C	G:G	T:T	G:G	A:A	G:A	T:C	A:C
316	HR_1_6	2019_1st	train set	case	case	G:G	T:T	C:C	G:G	G:G	A:A	G:G	G:G	T:C	T:C	T:T	G:G	A:A	A:A	C:C	T:T	G:G	C:C	A:G	A:A	A:A	A:A	G:A	G:G	C:C	T:A	C:C	T:T	G:G	C:A	A:G	T:C	G:G	T:A	T:C	A:T	C:T	G:G	T:T	G:A	A:A	G:A	T:C	C:C
317	HR_1_51	2019_1st	train set	case	case	G:G	T:T	C:C	G:G	G:G	A:A	G:G	G:G	T:C	T:C	T:T	G:G	A:A	A:A	C:C	T:T	G:G	C:C	A:G	A:A	A:A	A:G	G:A	G:G	C:T	T:T	C:C	T:T	G:G	C:C	A:A	T:C	G:G	T:A	T:C	A:A	C:T	G:T	T:T	G:G	A:A	G:G	T:C	A:C
318	HR_1_93	2019_1st	train set	case	case	G:G	T:T	C:C	G:G	G:G	A:A	G:G	G:G	T:C	T:C	T:T	G:G	A:A	A:A	C:C	T:T	G:G	C:C	A:G	A:A	A:A	A:A	G:A	G:G	C:T	T:T	C:C	T:T	G:G	C:C	A:A	T:C	G:G	T:T	T:C	A:A	C:T	G:G	T:T	A:A	A:A	G:G	T:C	A:C
319	HR_1_44	2019_1st	train set	case	case	G:G	T:T	C:C	G:G	G:G	A:A	G:G	G:T	T:C	T:C	T:C	G:G	A:G	A:A	C:C	T:T	G:G	C:C	A:G	A:A	A:A	A:A	G:A	G:G	C:C	T:T	C:C	T:T	G:G	C:C	A:A	T:C	G:G	T:A	T:C	A:A	C:T	G:G	T:T	G:A	A:A	G:G	T:C	A:A
320	HR_1_85	2019_1st	train set	case	case	G:G	T:T	C:C	G:G	G:G	A:A	G:G	G:G	T:C	T:C	T:T	G:G	A:A	A:A	C:C	T:T	G:G	C:T	G:G	A:A	A:A	A:A	G:A	G:G	T:T	T:T	C:C	T:T	G:G	C:C	A:A	T:C	G:G	T:T	T:C	A:T	C:T	G:T	T:T	G:G	A:A	G:G	T:C	C:C
321	HR_1_36	2019_1st	train set	case	case	G:G	T:T	C:T	G:G	G:G	A:A	G:G	G:G	T:C	T:C	T:T	G:G	A:A	A:A	C:C	T:T	G:G	C:C	A:G	A:A	A:A	A:G	G:A	G:G	C:T	T:A	C:C	T:T	G:G	C:C	A:A	T:C	G:G	T:A	T:C	T:T	C:T	G:G	T:T	G:G	A:A	G:A	T:C	C:C
322	HR_1_77	2019_1st	train set	case	case	G:G	T:T	C:C	G:G	G:G	A:A	G:G	T:T	T:T	T:C	T:T	G:G	A:G	A:A	C:C	T:T	G:G	C:C	A:G	A:A	A:A	A:A	G:A	G:G	C:T	T:T	C:C	T:T	G:G	C:C	A:A	T:C	G:G	T:A	T:C	A:T	C:C	G:G	T:T	G:G	A:G	G:G	T:C	C:C
323	HR_1_28	2019_1st	train set	case	case	G:G	T:T	C:C	G:G	G:G	A:A	G:G	G:T	T:C	T:C	T:T	G:G	A:G	A:A	C:C	T:T	G:G	C:C	A:G	A:A	A:A	A:A	G:A	G:G	C:C	T:T	C:C	T:T	G:G	C:A	A:A	T:C	G:G	T:T	T:C	A:A	C:T	G:G	T:T	G:A	A:A	G:G	T:C	A:C
324	HR_1_69	2019_1st	train set	case	case	G:G	T:T	C:C	G:G	G:G	A:A	G:G	G:G	T:C	T:C	T:T	G:G	A:A	G:G	C:C	T:T	G:G	C:C	A:G	A:A	A:A	A:G	G:A	G:G	C:C	T:T	C:C	T:T	G:G	C:C	A:A	T:T	G:G	T:A	T:C	T:T	C:C	G:G	T:T	G:G	A:A	G:G	T:C	C:C
325	HR_1_61	2019_1st	train set	case	case	G:G	T:T	C:C	G:G	G:G	A:A	G:G	G:T	T:C	T:C	C:C	G:G	A:G	A:A	C:C	T:T	G:G	C:C	A:G	A:A	A:A	A:A	G:A	G:G	C:T	T:T	C:C	T:T	G:G	C:C	A:A	T:C	G:G	T:T	T:C	A:A	C:T	G:G	T:T	G:A	A:A	G:G	T:C	A:C
326	HR_1_12	2019_1st	train set	case	case	G:G	T:T	C:T	G:G	G:G	A:A	G:G	G:G	T:C	T:C	T:T	G:G	A:A	A:A	C:C	T:T	G:G	C:C	A:G	A:A	A:A	A:G	G:A	G:G	C:T	T:A	C:C	T:T	G:G	C:A	A:A	T:C	G:G	T:A	T:C	A:T	C:T	G:G	T:T	G:G	A:A	G:G	T:C	A:A
327	HR_1_53	2019_1st	train set	case	case	G:G	T:T	C:C	G:G	G:G	A:A	G:G	G:G	T:T	T:C	T:T	G:G	A:A	A:A	C:C	T:T	G:G	C:C	A:G	A:A	A:A	A:G	G:A	G:G	T:T	T:T	C:C	T:T	G:A	C:C	A:A	T:C	G:G	A:A	T:C	A:T	C:T	G:T	T:T	A:A	A:A	G:A	T:C	A:C
328	HR_1_45	2019_1st	train set	case	case	No Call	T:T	C:C	G:G	G:G	A:A	G:G	G:T	T:T	T:C	T:C	G:G	A:A	A:A	C:C	T:T	G:G	C:C	A:G	A:A	A:A	A:A	G:A	G:G	C:C	T:T	C:C	T:T	G:G	C:A	A:A	T:C	G:G	T:A	T:C	A:A	C:T	G:G	T:T	G:G	A:G	G:G	T:C	C:C
329	HR_1_92	2019_1st	train set	case	case	G:G	T:T	C:C	G:G	G:G	A:A	G:G	G:G	T:T	T:C	T:T	G:G	A:A	A:A	C:C	T:T	G:G	C:C	A:G	A:A	A:A	A:A	G:A	G:G	T:T	T:T	C:C	T:T	G:G	C:A	A:A	T:C	G:G	T:A	T:C	A:T	C:T	G:G	T:T	A:A	A:A	G:A	T:C	A:C
330	HR_1_37	2019_1st	train set	case	case	G:G	T:T	C:T	G:G	G:G	A:A	G:G	G:G	T:C	T:C	T:T	G:G	A:A	G:G	C:C	T:T	G:G	C:C	A:G	A:A	A:A	A:G	G:A	G:G	C:C	T:T	C:C	T:T	G:G	C:C	A:G	T:C	G:G	T:A	T:C	T:T	C:T	G:G	T:T	G:A	A:A	G:A	T:C	C:C
331	HR_1_29	2019_1st	train set	case	case	G:G	T:T	C:C	G:G	G:G	A:A	G:G	G:G	T:T	T:C	T:T	G:G	A:A	A:A	T:T	T:T	G:G	C:C	A:G	A:A	A:A	A:G	G:A	G:G	T:T	T:T	C:C	T:T	G:G	C:C	A:A	T:T	G:G	T:A	T:C	A:A	C:C	G:T	T:T	A:A	A:A	G:A	T:C	C:C
332	HR_1_76	2019_1st	train set	case	case	G:G	T:T	C:C	G:G	G:G	A:A	G:G	G:G	T:C	T:C	T:T	G:G	A:A	A:A	C:C	T:T	G:G	C:C	A:G	A:A	A:A	G:G	G:A	G:A	T:T	T:T	C:C	T:T	G:A	C:A	A:A	T:T	G:G	T:T	T:C	A:T	C:C	G:G	T:T	G:G	A:A	G:G	T:C	A:C
333	HR_1_68	2019_1st	train set	case	case	G:G	T:T	C:C	G:G	G:G	A:A	G:G	G:G	T:T	T:C	T:T	G:G	A:A	A:A	C:C	T:T	G:G	C:C	G:G	A:A	A:A	A:A	G:A	G:G	T:T	T:T	C:C	T:T	G:A	C:A	A:A	T:C	G:G	A:A	T:C	A:A	C:T	G:T	T:T	G:G	A:A	G:A	T:C	A:C
334	HR_1_13	2019_1st	train set	case	case	G:G	T:T	C:C	G:G	G:G	A:A	G:G	G:G	T:T	T:C	T:T	G:G	A:A	A:A	C:C	T:T	G:G	C:C	A:G	A:A	A:A	A:A	G:A	G:G	T:T	T:T	C:C	T:T	G:A	C:C	A:A	T:T	G:G	T:A	T:C	A:A	C:C	G:G	T:T	A:A	A:A	G:G	T:C	A:C
335	HR_1_60	2019_1st	train set	case	case	G:G	T:T	T:T	G:G	G:G	A:A	G:G	G:G	T:C	T:C	T:T	G:G	A:A	A:A	C:C	T:T	G:G	C:C	A:G	A:A	A:A	A:G	G:A	G:A	T:T	T:T	C:C	T:T	G:A	C:C	A:A	T:T	G:G	T:T	T:C	T:T	C:C	G:G	T:T	A:A	A:A	G:G	T:C	A:C
336	HR_1_5	2019_1st	train set	case	case	G:G	T:T	C:C	G:G	G:G	A:A	G:G	G:G	T:T	T:C	T:T	G:G	A:A	A:A	C:C	T:T	G:G	C:C	A:G	A:A	A:A	A:A	G:A	G:G	T:T	T:T	C:C	T:T	G:G	C:C	A:A	T:C	G:G	A:A	T:C	A:T	C:T	G:G	T:T	A:A	A:A	G:G	T:C	A:C
337	HR_1_52	2019_1st	train set	case	case	G:G	T:T	C:C	G:G	G:G	A:A	G:G	G:G	T:T	T:C	T:T	G:G	A:A	G:G	C:C	T:T	G:G	C:C	A:G	A:A	A:A	A:G	G:A	G:G	C:T	T:T	C:C	T:T	G:G	C:A	A:A	T:C	G:A	T:A	T:C	A:A	T:T	G:G	T:T	G:A	A:A	G:G	T:C	C:C
338	HR_2_192	2019_1st	test set	case	case	G:G	T:T	C:C	G:G	G:G	A:A	G:G	G:G	T:C	T:C	T:C	G:G	A:A	A:A	C:T	T:T	G:G	C:C	A:G	A:A	A:A	A:A	G:A	G:A	C:C	T:T	C:C	T:T	G:G	C:A	A:A	T:C	G:G	T:T	T:C	A:A	C:T	G:G	T:T	G:A	A:A	G:G	T:C	C:C
339	HR_2_184	2019_1st	test set	case	case	G:G	T:T	C:T	G:G	G:G	A:A	G:G	G:G	T:C	T:C	T:T	G:G	A:A	A:A	C:C	T:T	G:G	C:C	A:G	A:A	A:A	A:A	G:A	G:G	C:T	T:T	C:C	T:T	G:G	C:A	A:G	T:C	G:G	A:A	T:C	A:T	C:T	G:G	T:T	G:G	A:A	G:A	T:C	A:C
340	HR_2_129	2019_1st	train set	case	case	G:G	T:T	C:C	G:G	G:G	A:A	G:G	G:G	T:C	T:C	T:T	G:G	A:A	A:A	C:T	T:T	G:G	C:C	A:G	A:A	A:A	A:A	G:A	G:G	T:T	T:T	C:C	T:T	G:G	C:A	A:A	T:C	G:G	A:A	T:C	A:T	C:T	G:G	T:T	G:G	A:A	G:A	T:C	A:C
341	HR_2_121	2019_1st	train set	case	case	G:G	T:T	C:C	G:G	G:G	A:A	G:G	G:G	T:C	T:C	T:T	G:G	A:A	A:G	C:C	T:T	G:G	C:C	A:G	A:A	A:A	A:G	G:A	G:G	C:C	T:T	C:C	T:T	G:G	C:A	A:G	T:T	G:G	A:A	T:C	A:T	C:C	G:G	T:T	G:G	A:A	G:G	T:C	A:A
342	HR_2_168	2019_1st	train set	case	case	G:G	T:T	C:C	G:G	G:G	A:A	G:G	G:G	T:C	T:C	T:T	G:G	A:A	A:G	C:C	T:T	G:G	C:C	A:G	A:A	A:A	A:A	G:A	G:G	C:C	T:A	C:C	T:T	G:G	C:A	A:G	T:C	G:G	A:A	T:C	A:T	C:T	G:G	T:T	G:G	A:G	G:A	T:C	A:C
343	HR_2_113	2019_1st	train set	case	case	G:G	T:T	C:C	G:G	G:G	A:A	G:G	G:G	T:C	T:C	T:T	G:G	A:A	A:A	C:C	T:T	G:G	C:C	A:G	A:A	A:A	A:A	G:A	G:G	C:C	T:A	C:C	T:T	G:G	C:A	A:G	T:C	G:G	T:A	T:C	A:T	C:T	G:G	T:T	G:G	A:A	G:A	T:C	A:C
344	HR_2_160	2019_1st	test set	case	case	No Call	T:T	C:C	G:C	G:G	A:A	G:G	T:T	T:C	T:C	T:T	G:G	A:A	A:A	C:T	T:T	G:G	C:C	G:G	A:A	A:A	A:A	G:A	G:G	C:T	T:T	C:C	T:T	G:G	C:C	A:A	T:C	G:G	A:A	T:C	A:A	C:C	G:G	T:T	A:A	A:G	G:A	T:C	C:C
345	HR_2_105	2019_1st	train set	case	case	G:G	T:T	T:T	G:G	G:G	A:A	G:G	G:G	T:C	T:C	T:T	G:G	A:A	A:A	C:C	T:T	G:G	C:C	A:G	A:A	A:A	G:G	G:A	G:G	T:T	T:T	C:C	T:T	G:G	C:C	A:A	T:T	G:G	T:T	T:C	A:T	C:C	G:G	T:T	G:G	A:A	G:G	T:C	A:C
346	HR_2_152	2019_1st	train set	case	case	G:G	T:T	C:C	G:G	G:G	A:A	G:G	G:G	T:T	T:C	T:C	G:G	A:G	A:A	C:C	T:T	G:G	C:T	G:G	A:A	A:A	A:A	G:A	G:A	C:T	T:T	C:C	T:T	G:G	C:C	A:A	T:C	G:G	T:T	T:C	A:A	C:T	G:G	T:T	G:G	A:G	G:G	T:C	A:C
347	HR_2_97	2019_1st	train set	case	case	G:G	T:T	C:C	G:G	G:G	A:A	G:G	G:G	T:C	T:C	T:T	G:G	A:A	A:A	C:C	T:T	G:G	C:C	A:G	A:A	A:A	A:A	G:A	G:A	C:C	T:T	C:C	T:T	G:G	C:C	A:A	T:C	G:G	T:T	T:C	A:A	C:T	G:G	T:T	G:A	A:A	G:G	T:C	A:A
348	HR_2_144	2019_1st	train set	case	case	G:G	T:T	C:T	G:G	G:G	A:A	G:G	G:G	T:C	T:C	T:T	G:G	A:A	A:A	C:C	T:T	G:G	C:C	A:G	A:A	A:A	A:G	G:A	G:G	C:T	T:A	C:C	T:T	G:G	C:C	A:G	T:T	G:G	A:A	T:C	A:T	C:C	G:G	T:T	G:G	A:A	G:G	T:C	A:C
349	HR_2_185	2019_1st	train set	case	case	G:G	T:T	C:C	G:G	G:G	A:A	G:G	G:G	T:C	T:C	T:T	G:G	A:A	A:A	T:T	T:T	G:G	C:T	G:G	A:A	A:A	A:A	G:A	G:G	T:T	T:T	C:C	T:T	G:G	C:C	A:A	T:C	G:G	T:T	T:C	A:T	C:T	G:T	T:T	G:G	A:A	G:A	T:C	C:C
350	HR_2_177	2019_1st	train set	case	case	G:G	T:T	C:C	G:G	G:G	A:A	G:G	G:G	T:C	T:C	T:T	G:G	A:A	A:G	C:C	T:T	G:G	C:C	A:G	A:A	A:A	A:G	G:A	G:G	C:T	T:T	C:C	T:T	G:G	C:A	A:A	T:T	G:G	A:A	T:C	A:T	C:C	G:G	T:T	G:G	A:A	G:A	T:C	A:A
351	HR_2_120	2019_1st	train set	case	case	G:G	T:T	C:C	G:G	G:G	A:A	G:G	G:G	T:T	T:C	T:T	G:G	A:A	A:A	C:T	T:T	G:G	C:C	A:G	A:A	A:A	A:G	G:A	G:G	C:T	T:T	C:C	T:T	G:G	C:A	A:A	T:C	G:G	A:A	T:C	A:A	C:T	G:G	T:T	G:G	A:A	G:G	T:C	A:C
352	HR_2_161	2019_1st	train set	case	case	G:G	T:T	C:C	G:G	G:G	A:A	G:G	G:G	T:C	T:C	T:T	G:G	A:G	A:A	C:C	T:T	G:G	C:C	A:G	A:A	A:A	A:A	G:A	G:A	C:C	T:T	C:C	T:T	G:G	C:A	A:A	T:C	G:G	T:T	T:C	A:A	C:T	G:G	T:T	G:A	A:A	G:G	T:C	A:C
353	HR_2_112	2019_1st	train set	case	case	G:G	T:T	C:C	G:G	G:G	A:A	G:G	G:G	T:T	T:C	T:T	G:G	A:G	A:A	C:T	T:T	G:G	C:C	A:G	A:A	A:A	A:A	G:A	G:A	C:C	T:T	C:C	T:T	G:G	C:C	A:A	T:C	G:G	T:T	T:C	A:A	C:T	G:G	T:T	G:A	A:G	G:G	T:C	A:C
354	HR_2_104	2019_1st	train set	case	case	G:G	T:T	C:T	G:G	G:G	A:A	G:G	G:G	T:C	T:C	T:T	G:G	A:A	A:A	C:C	T:T	G:G	C:C	A:G	A:A	A:A	A:G	G:A	G:G	T:T	T:T	C:C	T:T	G:G	C:C	A:A	T:T	G:G	T:A	T:C	T:T	C:C	G:G	T:T	G:G	A:A	G:G	T:C	A:A
355	HR_2_145	2019_1st	train set	case	case	G:G	T:T	C:C	G:G	G:G	A:A	G:G	G:G	T:C	T:C	T:T	G:G	A:A	A:A	C:C	T:T	G:G	C:C	A:G	A:A	A:A	A:A	G:A	G:A	C:T	T:T	C:C	T:T	G:G	C:A	A:A	T:C	G:G	T:A	T:C	A:A	C:T	G:G	T:T	G:A	A:A	G:G	T:C	A:C
356	HR_2_191	2019_1st	test set	case	case	G:G	T:T	C:C	G:G	G:G	A:A	G:G	G:G	T:T	T:C	T:T	G:G	A:G	A:A	C:C	T:T	G:G	C:C	A:G	A:A	A:A	A:A	G:A	G:A	C:C	T:T	C:C	T:T	G:G	C:A	A:A	T:C	G:G	T:A	T:C	A:A	C:T	G:G	T:T	G:A	A:G	G:G	T:C	A:C
357	HR_2_138	2019_1st	test set	case	case	G:G	T:T	C:T	G:G	G:G	A:A	G:G	G:G	T:C	T:C	T:T	G:G	A:A	A:A	C:C	T:T	G:G	C:C	A:G	A:A	A:A	A:G	G:A	G:G	C:T	T:A	C:C	T:T	G:G	C:C	A:A	T:T	G:G	A:A	T:C	T:T	C:C	G:G	T:T	G:G	A:G	G:G	T:C	C:C
358	HR_2_183	2019_1st	train set	case	case	G:G	T:T	C:C	G:G	G:G	A:A	G:G	G:G	T:C	T:C	T:C	G:G	A:A	A:A	C:C	T:T	G:G	C:T	G:G	A:A	A:A	A:A	G:A	G:A	C:T	T:T	C:C	T:T	G:G	C:C	A:A	T:C	G:G	T:T	T:C	A:A	C:T	G:G	T:T	G:G	A:A	G:G	T:C	C:C
359	HR_2_130	2019_1st	train set	case	case	G:G	T:T	C:C	G:G	G:G	A:A	G:G	G:T	T:C	T:C	T:C	G:G	A:G	A:A	C:C	T:T	G:G	C:C	A:G	A:A	A:A	A:A	G:A	G:G	C:T	T:T	C:C	T:T	G:G	C:C	A:A	T:C	G:G	A:A	T:C	A:A	C:T	G:G	T:T	G:A	A:A	G:G	T:C	A:C
360	HR_2_122	2019_1st	train set	case	case	G:G	T:T	C:C	G:G	G:G	A:A	G:G	G:G	T:C	T:C	T:T	G:G	A:A	A:A	C:C	T:T	G:G	C:C	A:G	A:A	A:A	A:A	G:A	G:G	C:C	T:A	C:C	T:T	G:G	C:C	A:A	T:C	G:G	A:A	T:C	T:T	C:T	G:G	T:T	G:G	A:G	G:A	T:C	A:A
361	HR_2_167	2019_1st	train set	case	case	G:G	T:T	C:T	G:G	G:G	A:A	G:G	G:G	T:C	T:C	T:T	G:G	A:A	A:A	C:C	T:T	G:G	C:C	A:G	A:A	A:A	A:A	G:A	G:G	C:T	T:A	C:C	T:T	G:G	C:C	A:G	T:C	G:G	T:A	T:C	T:T	C:T	G:G	T:T	G:G	A:G	G:A	T:C	A:C
362	HR_2_114	2019_1st	train set	case	case	G:G	T:T	C:C	G:C	G:G	A:A	G:G	T:T	T:C	T:C	T:T	G:G	A:A	A:A	C:C	T:T	G:G	C:C	A:G	A:A	A:A	A:A	G:A	G:G	C:C	T:T	C:C	T:T	G:G	C:C	A:A	C:C	G:G	T:A	T:C	A:T	C:C	G:G	T:G	G:G	A:A	G:A	T:C	A:C
363	HR_2_159	2019_1st	train set	case	case	G:G	T:T	C:C	G:G	G:G	A:A	G:G	G:T	T:C	T:C	T:T	G:G	A:A	A:A	C:C	T:T	G:G	C:C	A:G	A:A	A:A	A:A	G:A	G:G	C:T	T:T	C:C	T:T	G:G	C:A	A:A	T:C	G:G	T:T	T:C	A:A	C:T	G:G	T:T	G:A	A:A	G:G	T:C	A:C
364	HR_2_106	2019_1st	train set	case	case	G:G	T:T	C:C	G:G	G:G	A:A	G:G	G:G	T:C	T:C	T:T	G:G	A:G	A:A	C:T	T:T	G:G	C:T	G:G	A:A	A:A	A:A	G:A	G:A	C:T	T:T	C:C	T:T	G:G	C:C	A:A	T:C	G:G	A:A	T:C	A:A	C:T	G:G	T:T	G:A	A:A	G:G	T:C	C:C
365	HR_2_151	2019_1st	train set	case	case	G:G	T:T	C:T	G:G	G:G	A:A	G:G	G:G	T:C	T:C	T:T	G:G	A:A	G:G	C:C	T:T	G:G	C:C	A:G	A:A	A:A	A:A	G:A	G:G	C:C	T:A	C:C	T:T	G:G	C:C	A:A	T:C	G:G	A:A	T:C	T:T	C:T	G:G	T:T	G:G	A:A	G:G	T:C	A:C
366	HR_2_98	2019_1st	train set	case	case	G:G	T:T	C:C	G:G	G:G	A:A	G:G	G:G	T:C	T:C	T:T	G:G	A:A	G:G	C:C	T:T	G:G	C:C	A:G	A:A	A:A	A:A	G:A	G:G	C:C	T:A	C:C	T:T	G:G	C:C	A:G	T:C	G:G	A:A	T:C	T:T	C:T	G:G	T:T	G:G	A:A	G:A	T:C	A:A
367	HR_2_143	2019_1st	train set	case	case	G:G	T:T	C:C	G:G	G:G	A:A	G:G	G:T	T:C	T:C	T:C	G:G	A:A	A:A	C:C	T:T	G:G	C:C	A:G	A:A	A:A	A:A	G:A	G:G	C:C	T:T	C:C	T:T	G:G	C:C	A:A	T:C	G:G	T:A	T:C	A:A	C:T	G:G	T:T	G:A	A:A	G:G	T:C	A:C
368	HR_2_186	2019_1st	test set	case	case	G:G	T:T	C:C	G:G	G:G	A:A	G:G	G:G	T:T	T:C	T:T	G:G	A:A	A:A	C:T	T:T	G:G	C:C	A:G	A:A	A:A	A:A	G:A	G:G	C:T	T:T	C:C	T:T	G:G	C:C	A:A	T:C	G:G	T:A	T:C	A:A	C:T	G:G	T:T	A:A	A:A	G:A	T:C	A:C
369	HR_2_135	2019_1st	train set	case	case	G:G	T:T	C:C	G:G	G:G	A:A	G:G	G:G	T:C	T:C	T:T	G:G	A:A	A:A	C:C	T:T	G:G	C:C	A:G	A:A	A:A	A:G	G:A	G:G	C:C	T:T	C:C	T:T	G:G	C:C	A:G	T:T	G:G	A:A	T:C	T:T	C:C	G:G	T:T	G:G	A:G	G:G	T:C	A:C
370	HR_2_178	2019_1st	train set	case	case	G:G	T:T	C:C	G:G	G:G	A:A	G:G	G:G	T:C	T:C	T:T	G:G	A:A	A:A	C:C	T:T	G:G	C:C	A:G	A:A	A:A	A:G	G:A	G:G	C:C	T:T	C:C	T:T	G:G	C:A	A:G	T:T	G:G	A:A	T:C	A:T	C:C	G:G	T:T	G:G	A:G	G:A	T:C	A:C
371	HR_2_127	2019_1st	train set	case	case	G:G	T:T	C:T	G:G	G:G	A:A	G:G	G:G	T:C	T:C	T:T	G:G	A:A	A:A	C:C	T:T	G:G	C:C	A:G	A:A	A:A	A:G	G:A	G:G	C:T	T:T	C:C	T:T	G:G	C:A	A:A	T:T	G:G	T:A	T:C	T:T	C:C	G:G	T:T	G:G	A:A	G:A	T:C	C:C
372	HR_2_170	2019_1st	train set	case	case	G:G	T:T	C:C	G:G	G:G	A:A	G:G	G:G	T:C	T:C	T:T	G:G	A:A	A:A	C:C	T:T	G:G	C:C	A:G	A:A	A:A	A:A	G:A	G:G	C:C	T:A	C:C	T:T	G:G	C:C	A:G	T:C	G:G	A:A	T:C	T:T	C:T	G:G	T:T	G:G	A:G	G:A	T:C	A:A
373	HR_2_162	2019_1st	test set	case	case	G:G	T:T	C:C	G:G	G:G	A:A	G:G	G:G	T:T	T:C	T:T	G:G	A:A	A:A	C:T	T:T	G:G	C:C	A:G	A:A	A:A	A:A	G:A	G:G	C:T	T:T	C:C	T:T	G:G	C:A	A:A	T:C	G:G	T:T	T:C	A:A	C:T	G:G	T:T	A:A	A:A	G:G	T:C	A:A
374	HR_2_111	2019_1st	train set	case	case	G:G	T:T	C:C	G:G	G:G	A:A	G:G	G:G	T:C	T:C	T:T	G:G	A:A	A:A	C:C	T:T	G:G	C:C	A:G	A:A	A:A	A:G	G:A	G:G	C:C	T:T	C:C	T:T	G:G	C:C	A:G	T:T	G:G	A:A	T:C	A:T	C:C	G:G	T:T	G:G	A:A	G:G	T:C	A:A
375	HR_2_154	2019_1st	train set	case	case	No Call	T:T	C:C	G:G	G:G	A:A	G:G	G:G	T:C	T:C	T:T	G:G	A:A	A:A	C:C	T:T	G:G	C:C	A:G	A:A	A:A	A:A	G:A	G:A	C:C	T:T	C:C	T:T	G:G	C:A	A:A	T:C	G:G	T:T	T:C	A:A	C:T	G:G	T:T	G:A	A:A	G:G	T:C	C:C
376	HR_2_103	2019_1st	train set	case	case	No Call	T:T	C:C	G:G	G:G	A:A	G:G	G:T	T:C	T:C	T:T	G:G	No Call	A:A	C:C	T:T	G:G	C:C	A:G	A:A	A:A	A:A	G:A	G:G	C:T	T:T	C:C	T:T	G:G	C:C	A:A	No Call	G:G	T:A	T:C	A:A	C:T	G:T	T:T	G:A	A:G	G:G	T:C	C:C
377	HR_2_146	2019_1st	train set	case	case	G:G	T:T	C:C	G:G	G:G	A:A	G:G	G:G	T:C	T:C	T:T	G:G	A:A	A:A	C:C	T:T	G:G	C:C	A:G	A:A	A:A	A:G	G:A	G:G	C:C	T:A	C:C	T:T	G:G	C:A	A:A	T:T	G:G	A:A	T:C	A:T	C:C	G:G	T:T	G:G	A:G	G:G	T:C	A:C
378	HR_2_190	2019_1st	test set	case	case	G:G	T:T	C:C	G:G	G:G	A:A	G:G	G:G	T:T	T:C	T:C	G:G	A:A	A:A	C:C	T:T	G:G	C:C	A:G	A:A	A:A	A:A	G:A	G:A	C:T	T:T	C:C	T:T	G:G	C:A	A:A	T:C	G:G	T:T	T:C	A:A	C:T	G:G	T:T	G:A	A:G	G:G	T:C	A:C
379	HR_2_139	2019_1st	test set	case	control	G:G	T:T	C:C	G:G	G:G	A:A	G:G	G:G	T:C	T:C	T:T	G:G	A:A	A:A	C:C	T:T	G:G	C:C	G:G	A:A	A:A	A:A	G:A	G:G	T:T	T:T	C:C	T:T	G:G	C:C	A:A	T:C	G:G	T:T	T:C	A:A	C:T	G:G	T:T	G:G	A:A	G:G	T:C	A:C
380	HR_2_182	2019_1st	train set	case	case	G:G	T:T	T:T	G:G	G:G	A:A	G:G	G:G	T:C	T:C	T:T	G:G	A:A	A:A	C:C	T:T	G:G	C:C	A:G	A:A	A:A	G:G	G:A	G:G	T:T	T:T	C:C	T:T	G:G	C:C	A:A	T:T	G:G	T:T	T:C	T:T	C:C	G:G	T:T	A:A	A:G	G:G	T:C	A:C
381	HR_2_131	2019_1st	train set	case	case	G:G	T:T	C:C	G:G	G:G	A:A	G:G	G:G	T:C	T:C	T:T	G:G	A:A	G:G	C:C	T:T	G:G	C:C	A:G	A:A	A:A	A:G	G:A	G:G	C:C	T:A	C:C	T:T	G:G	C:A	A:G	T:T	G:G	A:A	T:C	T:T	C:C	G:G	T:T	G:G	A:A	G:A	T:C	A:C
382	HR_2_174	2019_1st	train set	case	case	No Call	T:T	C:C	G:G	G:G	A:A	G:G	G:T	T:C	T:C	T:C	G:G	A:G	A:A	C:C	T:T	G:G	C:T	G:G	A:A	A:A	A:A	G:A	G:G	C:T	T:T	C:C	T:T	G:G	C:A	A:A	T:C	G:G	T:T	T:C	A:A	C:T	G:G	T:T	G:A	A:A	G:G	T:C	C:C
383	HR_2_123	2019_1st	train set	case	case	G:G	T:T	C:C	G:G	G:G	A:A	G:G	G:G	T:C	T:C	T:T	G:G	A:A	G:G	C:C	T:T	G:G	C:C	A:G	A:A	A:A	A:G	G:A	G:G	C:C	T:A	C:C	T:T	G:G	C:C	A:G	T:T	G:G	A:A	T:C	T:T	C:C	G:G	T:T	G:G	A:A	G:A	T:C	C:C
384	HR_2_166	2019_1st	train set	case	case	G:G	T:T	T:T	G:G	G:G	A:A	G:G	G:G	T:C	T:C	T:T	G:G	A:A	A:A	C:T	T:T	G:G	C:C	A:G	A:A	A:A	A:G	G:A	G:A	T:T	T:A	C:C	T:T	G:G	C:A	A:A	T:T	G:G	T:T	T:C	A:T	C:C	G:G	T:T	A:A	A:A	G:G	T:C	A:C
385	HR_2_115	2019_1st	train set	case	case	G:G	T:T	C:C	G:G	G:G	A:A	G:G	G:T	T:C	T:C	T:T	G:G	A:G	A:A	C:C	T:T	G:G	C:C	A:G	A:A	A:A	A:A	G:A	G:G	C:C	T:T	C:C	T:T	G:G	C:C	A:A	T:C	G:G	A:A	T:C	A:A	C:T	G:G	T:T	G:A	A:A	G:G	T:C	C:C
386	HR_2_107	2019_1st	train set	case	case	G:G	T:T	C:C	G:G	G:G	A:A	G:G	G:G	T:C	T:C	T:C	G:G	A:A	A:A	C:T	T:T	G:G	C:C	A:G	A:A	A:A	A:A	G:A	G:A	C:C	T:T	C:C	T:T	G:G	C:A	A:A	T:C	G:G	T:T	T:C	A:A	C:T	G:G	T:T	G:A	A:A	G:G	T:C	A:C
387	HR_2_142	2019_1st	train set	case	case	G:G	T:T	C:C	G:G	G:G	A:A	G:G	G:G	T:C	T:C	T:T	G:G	A:A	A:A	C:C	T:T	G:G	C:C	A:G	A:A	A:A	A:A	G:A	G:G	C:T	T:T	C:C	T:T	G:G	C:A	A:A	T:C	G:G	T:A	T:C	A:T	C:T	G:T	T:T	A:A	A:A	G:G	T:C	A:C
388	HR_2_187	2019_1st	train set	case	case	G:G	T:T	C:C	G:G	G:G	A:A	G:G	G:G	T:C	T:C	T:T	G:G	A:A	A:A	C:T	T:T	G:G	C:C	A:G	A:A	A:A	A:G	G:A	G:G	C:T	T:T	C:C	T:T	G:G	C:A	A:A	T:C	G:G	A:A	T:C	A:T	C:T	G:G	T:T	A:A	A:A	G:G	T:C	A:C
389	HR_2_134	2019_1st	test set	case	case	G:G	T:T	C:C	G:G	G:G	A:A	G:G	G:T	T:T	T:C	T:T	G:G	A:G	A:A	C:C	T:T	G:G	C:C	A:G	A:A	A:A	A:A	G:A	G:G	C:C	T:T	C:C	T:T	G:G	C:A	A:A	T:C	G:G	T:A	T:C	A:A	C:T	G:G	T:T	G:A	A:G	G:G	T:C	C:C
390	HR_2_179	2019_1st	train set	case	case	G:G	T:T	C:C	G:G	G:G	A:A	G:G	T:T	T:T	T:C	T:T	G:G	A:G	A:A	C:C	T:T	G:G	C:T	G:G	A:A	A:A	A:A	G:A	G:G	C:T	T:T	C:C	T:T	G:G	C:C	A:A	T:C	G:G	A:A	T:C	A:T	C:C	G:G	T:T	G:G	A:G	G:A	T:C	A:C
391	HR_2_126	2019_1st	train set	case	case	G:G	T:T	C:C	G:G	G:G	A:A	G:G	G:G	T:C	T:C	T:T	G:G	A:G	A:A	C:C	T:T	G:G	C:C	A:G	A:A	A:A	A:A	G:A	G:A	C:C	T:T	C:C	T:T	G:G	C:C	A:A	T:C	G:G	T:T	T:C	A:A	C:T	G:G	T:T	G:A	A:A	G:G	T:C	A:C
392	HR_2_171	2019_1st	train set	case	case	G:G	T:T	C:C	G:G	G:G	A:A	G:G	G:T	T:C	T:C	T:T	G:G	A:A	A:A	C:C	T:T	G:G	C:C	A:G	A:A	A:A	A:A	G:A	G:G	C:T	T:T	C:C	T:T	G:G	C:C	A:A	T:C	G:G	A:A	T:C	A:T	C:C	G:G	T:G	A:A	A:A	G:A	T:C	A:C
393	HR_2_118	2019_1st	train set	case	case	G:G	T:T	C:C	G:G	G:G	A:A	G:G	G:G	T:C	T:C	T:T	G:G	A:A	A:A	C:T	T:T	G:G	C:C	A:G	A:A	A:A	A:G	G:A	G:G	T:T	T:T	C:C	T:T	G:G	C:C	A:A	T:T	G:G	T:A	T:C	A:A	C:C	G:T	T:T	G:G	A:A	G:G	T:C	C:C
394	HR_2_110	2019_1st	train set	case	case	G:G	T:T	C:C	G:G	G:G	A:A	G:G	G:G	T:C	T:C	T:T	G:G	A:A	A:A	T:T	T:T	G:G	C:C	A:G	A:A	A:A	A:A	G:A	G:G	T:T	T:T	C:C	T:T	G:G	C:C	A:A	T:T	G:G	T:T	T:C	A:T	C:C	G:G	T:T	A:A	A:A	G:A	T:C	A:C
395	HR_2_155	2019_1st	train set	case	case	No Call	T:T	C:C	G:G	G:G	A:A	G:G	G:G	T:T	T:C	T:T	G:G	A:A	A:A	T:T	T:T	G:G	T:T	G:G	A:A	A:A	A:A	G:A	G:G	T:T	T:T	C:C	T:T	G:G	C:A	A:A	T:C	G:G	A:A	T:C	A:A	C:T	G:T	T:T	A:A	A:A	G:A	T:C	C:C
396	HR_2_102	2019_1st	train set	case	case	G:G	T:T	C:C	G:G	G:G	A:A	G:G	G:G	T:T	T:C	T:T	G:G	A:A	A:A	C:C	T:T	G:G	C:C	A:G	A:A	A:A	A:A	G:A	G:A	C:T	T:T	C:C	T:T	G:G	C:A	A:A	T:C	G:G	T:A	T:C	A:A	C:T	G:G	T:T	G:A	A:G	G:G	T:C	A:C
397	HR_2_189	2019_1st	train set	case	case	G:G	T:T	C:T	G:G	G:G	A:A	G:G	G:G	T:C	T:C	T:T	G:G	A:A	A:A	C:C	T:T	G:G	C:C	A:G	A:A	A:A	A:G	G:A	G:G	C:T	T:A	C:C	T:T	G:G	C:C	A:A	T:T	G:G	A:A	T:C	T:T	C:C	G:G	T:T	G:G	A:G	G:A	T:C	C:C
398	HR_2_140	2019_1st	train set	case	case	G:G	T:T	C:C	G:G	G:G	A:A	G:G	G:G	T:T	T:C	T:T	G:G	A:G	A:A	C:C	T:T	G:G	C:C	A:G	A:A	A:A	A:A	G:A	G:A	C:C	T:T	C:C	T:T	G:G	C:C	A:A	T:C	G:G	T:T	T:C	A:A	C:T	G:G	T:T	G:G	A:G	G:G	T:C	A:A
399	HR_2_181	2019_1st	train set	case	case	G:G	T:T	C:T	G:G	G:G	A:A	G:G	G:G	T:C	T:C	T:T	G:G	A:A	A:A	C:C	T:T	G:G	C:C	A:G	A:A	A:A	A:A	G:A	G:G	C:T	T:A	C:C	T:T	G:G	C:C	A:A	T:T	G:G	A:A	T:C	T:T	C:C	G:G	T:T	G:G	A:A	G:G	T:C	C:C
400	HR_2_132	2019_1st	train set	case	case	G:G	T:T	C:C	G:G	G:G	A:A	G:G	G:G	T:C	T:C	T:T	G:G	A:A	A:A	T:T	T:T	G:G	C:C	A:G	A:A	A:A	A:G	G:A	G:G	T:T	T:T	C:C	T:T	G:G	C:A	A:A	T:C	G:G	T:T	T:C	A:A	C:T	G:G	T:T	A:A	A:A	G:A	T:C	A:C
401	HR_2_173	2019_1st	train set	case	case	G:G	T:T	C:C	G:G	G:G	A:A	G:G	G:T	T:C	T:C	T:T	G:G	A:A	A:A	C:C	T:T	G:G	C:C	A:G	A:A	A:A	A:A	G:A	G:G	C:C	T:T	C:C	T:T	G:G	C:A	A:A	T:C	G:G	T:A	T:C	A:A	C:T	G:G	T:T	G:A	A:A	G:G	T:C	C:C
402	HR_2_124	2019_1st	train set	case	case	G:G	T:T	C:C	G:G	G:G	A:A	G:G	G:G	T:C	T:C	T:C	G:G	A:A	A:A	C:T	T:T	G:G	C:C	G:G	A:A	A:A	A:A	G:A	G:A	C:T	T:T	C:C	T:T	G:G	C:A	A:A	T:C	G:G	A:A	T:C	A:A	C:T	G:G	T:T	G:A	A:A	G:G	T:C	A:C
403	HR_2_165	2019_1st	test set	case	control	G:G	T:T	T:T	G:G	G:G	A:A	G:G	G:G	T:C	T:C	T:T	G:G	A:A	A:A	C:C	T:T	G:G	C:C	A:G	A:A	A:A	A:A	G:A	G:G	T:T	T:A	C:C	T:T	G:G	C:C	A:A	T:T	G:G	T:T	T:C	T:T	C:C	G:G	T:T	A:A	A:A	G:G	T:C	A:C
404	HR_2_116	2019_1st	train set	case	case	G:G	T:T	C:C	G:G	G:G	A:A	G:G	G:G	T:C	T:C	T:T	G:G	A:A	A:A	T:T	T:T	G:G	C:C	A:G	A:A	A:A	A:G	G:A	G:G	T:T	T:T	C:C	T:T	G:G	C:C	A:A	T:C	G:G	A:A	T:C	A:A	C:T	G:G	T:T	G:G	A:A	G:A	T:C	A:C
405	HR_2_157	2019_1st	train set	case	case	G:G	T:T	C:C	G:G	G:G	A:A	G:G	G:G	T:C	T:C	T:C	G:G	A:G	A:A	C:C	T:T	G:G	C:C	A:G	A:A	A:A	A:A	G:A	G:A	C:C	T:T	C:C	T:T	G:G	C:C	A:A	T:C	G:G	T:T	T:C	A:A	C:T	G:G	T:T	G:G	A:A	G:G	T:C	A:C
406	HR_2_108	2019_1st	train set	case	case	G:G	T:T	C:C	G:G	G:G	A:A	G:G	G:T	T:C	T:C	T:T	G:G	A:A	A:A	C:C	T:T	G:G	C:C	A:G	A:A	A:A	A:A	G:A	G:G	C:C	T:T	C:C	T:T	G:G	C:C	A:A	T:T	G:G	T:A	T:C	A:T	C:C	G:G	G:G	A:A	A:A	G:A	T:C	C:C
407	HR_2_149	2019_1st	train set	case	case	G:G	T:T	C:C	G:G	G:G	A:A	G:G	G:G	T:T	T:C	T:T	G:G	A:A	A:A	C:T	T:T	G:G	C:C	A:G	A:A	A:A	A:A	G:A	G:G	T:T	T:T	C:C	T:T	G:G	C:C	A:A	T:C	G:G	A:A	T:C	A:A	C:T	G:T	T:T	A:A	A:A	G:A	T:C	A:C
408	HR_2_133	2019_1st	train set	case	case	G:G	T:T	C:C	G:G	G:G	A:A	G:G	G:G	T:C	T:C	T:T	G:G	A:A	A:A	C:C	T:T	G:G	C:C	A:G	A:A	A:A	A:A	G:A	G:A	C:T	T:T	C:C	T:T	G:G	C:C	A:A	T:C	G:G	T:T	T:C	A:A	C:T	G:G	T:T	G:A	A:A	G:G	T:C	C:C
409	HR_2_125	2019_1st	train set	case	case	G:G	T:T	C:C	G:G	G:G	A:A	G:G	G:T	T:C	T:C	T:C	G:G	A:A	A:A	C:C	T:T	G:G	C:C	A:G	A:A	A:A	A:A	G:A	G:G	C:T	T:T	C:C	T:T	G:G	C:C	A:A	T:C	G:G	T:T	T:C	A:A	C:T	G:G	T:T	G:A	A:A	G:G	T:C	A:C
410	HR_2_172	2019_1st	test set	case	case	G:G	T:T	C:C	G:G	G:G	A:A	G:G	G:G	T:T	T:C	T:T	G:G	A:A	A:A	C:T	T:T	G:G	C:C	A:G	A:A	A:A	A:G	G:A	G:G	C:T	T:T	C:C	T:T	G:G	C:C	A:A	T:C	G:G	T:T	T:C	A:A	C:T	G:G	T:T	G:G	A:A	G:G	T:C	A:A
411	HR_2_117	2019_1st	test set	case	case	G:G	T:T	C:C	G:G	G:G	A:A	G:G	G:T	T:C	T:C	T:T	G:G	A:A	A:A	C:T	T:T	G:G	C:C	A:G	A:A	A:A	A:A	G:A	G:G	C:T	T:T	C:C	T:T	G:G	C:A	A:A	T:C	G:G	T:T	T:C	A:A	C:T	G:G	T:T	G:A	A:A	G:G	T:C	A:C
412	HR_2_164	2019_1st	train set	case	case	G:G	T:T	C:C	G:G	G:G	A:A	G:G	G:G	T:C	T:C	T:T	G:G	A:A	A:A	C:T	T:T	G:G	C:C	A:G	A:A	A:A	A:A	G:A	G:G	C:T	T:T	C:C	T:T	G:G	C:A	A:A	T:T	G:G	A:A	T:C	A:A	C:C	G:T	T:T	G:G	A:A	G:G	T:C	C:C
413	HR_2_109	2019_1st	train set	case	case	G:G	T:T	C:C	G:G	G:G	A:A	G:G	G:G	T:C	T:C	T:T	G:G	A:A	A:A	C:T	T:T	G:G	C:C	A:G	A:A	A:A	A:A	G:A	G:A	C:T	T:T	C:C	T:T	G:G	C:A	A:A	T:C	G:G	T:T	T:C	A:A	C:T	G:G	T:T	G:A	A:A	G:G	T:C	C:C
414	HR_2_156	2019_1st	train set	case	case	No Call	T:T	C:C	G:G	G:G	A:A	G:G	G:G	T:T	T:C	T:T	G:G	A:A	A:A	T:T	T:T	G:G	C:C	A:G	A:A	A:A	A:A	G:A	G:G	T:T	T:T	C:C	T:T	G:G	C:A	A:A	T:C	G:G	T:T	T:C	A:A	C:T	G:T	T:T	A:A	A:A	G:A	T:C	C:C
415	HR_2_101	2019_1st	train set	case	case	G:G	T:T	C:C	G:G	G:G	A:A	G:G	G:T	T:C	T:C	T:C	G:G	A:G	A:A	No Call	T:T	G:G	T:T	G:G	A:A	A:A	A:A	G:A	G:G	C:T	T:T	C:C	T:T	G:G	C:C	A:A	T:C	G:G	T:A	T:C	A:A	C:T	G:G	T:T	G:A	A:A	G:G	T:C	A:C
416	HR_3_288	2019_1st	train set	case	case	G:G	T:T	C:T	G:G	G:G	A:A	G:G	G:G	T:C	T:C	T:T	G:G	A:A	A:G	C:C	T:T	G:G	C:C	A:G	A:A	A:A	A:G	G:A	G:G	C:T	T:A	C:C	T:T	G:G	C:A	A:G	T:T	G:G	A:A	T:C	A:T	C:C	G:G	T:T	G:G	A:G	G:A	T:C	A:C
417	HR_3_280	2019_1st	train set	case	case	G:G	T:T	C:C	G:G	G:G	A:A	G:G	G:G	T:C	T:C	T:T	G:G	A:A	A:A	T:T	T:T	G:G	C:C	A:G	A:A	A:A	A:A	G:A	G:G	C:T	T:T	C:C	T:T	G:G	C:C	A:A	T:C	G:G	T:T	T:C	A:T	C:T	G:T	T:T	G:G	A:A	G:A	T:C	A:C
418	HR_3_225	2019_1st	train set	case	case	G:G	T:T	C:C	G:G	G:G	A:A	G:G	G:G	T:C	T:C	T:C	G:G	A:G	A:A	C:T	T:T	G:G	C:T	G:G	A:A	A:A	A:A	G:A	G:A	C:T	T:T	C:C	T:T	G:G	C:A	A:A	T:C	G:G	A:A	T:C	A:A	C:T	G:G	T:T	G:A	A:A	G:G	T:C	A:C
419	HR_3_217	2019_1st	train set	case	case	G:G	T:T	C:C	G:G	G:G	A:A	G:G	G:T	T:C	T:C	T:T	G:G	A:G	A:A	C:C	T:T	G:G	C:C	A:G	A:A	A:A	A:A	G:A	G:G	C:C	T:T	C:C	T:T	G:G	C:C	A:A	T:C	G:G	T:T	T:C	A:A	C:T	G:G	T:T	G:G	A:A	G:G	T:C	C:C
420	HR_3_209	2019_1st	train set	case	case	G:G	T:T	C:C	G:G	G:G	A:A	G:G	G:T	T:C	T:C	T:T	G:G	A:A	A:A	C:C	T:T	G:G	C:C	A:G	A:A	A:A	A:A	G:A	G:G	C:C	T:T	C:C	T:T	G:G	C:C	A:A	T:C	G:G	T:A	T:C	A:A	C:T	G:G	T:T	G:A	A:A	G:G	T:C	A:C
421	HR_3_256	2019_1st	train set	case	case	G:G	T:T	C:C	G:G	G:G	A:A	G:G	G:G	T:C	T:C	T:T	G:G	A:A	A:A	T:T	T:T	G:G	C:C	A:G	A:A	A:A	A:G	G:A	G:G	C:T	T:T	C:C	T:T	G:G	C:A	A:A	T:C	G:G	T:T	T:C	A:A	C:T	G:G	T:T	A:A	A:A	G:A	T:C	A:C
422	HR_3_201	2019_1st	train set	case	case	G:G	T:T	C:T	G:G	G:G	A:A	G:G	G:G	T:C	T:C	T:T	G:G	A:A	A:A	C:C	T:T	G:G	C:C	A:G	A:A	A:A	A:G	G:A	G:G	C:T	T:A	C:C	T:T	G:G	C:C	A:A	T:C	G:G	A:A	T:C	T:T	C:T	G:G	T:T	G:G	A:A	G:G	T:C	A:A
423	HR_3_248	2019_1st	train set	case	case	G:G	T:T	C:C	G:G	G:G	A:A	G:G	G:G	T:C	T:C	T:T	G:G	A:A	A:A	C:C	T:T	G:G	C:C	A:G	A:A	A:A	A:A	G:A	G:G	C:C	T:A	C:C	T:T	G:G	C:C	A:G	T:T	G:G	A:A	T:C	T:T	C:C	G:G	T:T	G:G	A:A	G:A	T:C	C:C
424	HR_3_193	2019_1st	train set	case	case	G:G	T:T	C:T	G:G	G:G	A:A	G:G	G:G	T:C	T:C	T:T	G:G	A:A	A:A	C:C	T:T	G:G	C:C	A:G	A:A	A:A	A:A	G:A	G:G	C:T	T:A	C:C	T:T	G:G	C:C	A:G	T:C	G:G	A:A	T:C	T:T	C:T	G:G	T:T	G:G	A:A	G:G	T:C	C:C
425	HR_3_281	2019_1st	test set	case	control	G:G	T:T	C:C	G:G	G:G	A:A	G:G	G:T	T:T	T:C	C:C	G:G	A:G	A:A	C:C	T:T	G:G	C:C	A:G	A:A	A:A	A:A	G:A	G:G	C:C	T:T	C:C	T:T	G:G	C:A	A:A	T:C	G:G	T:T	T:C	A:A	C:T	G:G	T:T	G:A	A:G	G:G	T:C	A:C
426	HR_3_224	2019_1st	train set	case	case	G:G	T:T	C:C	G:G	G:G	A:A	G:G	G:G	T:C	T:C	T:C	G:G	A:G	A:A	C:C	T:T	G:G	C:C	A:G	A:A	A:A	A:A	G:A	G:A	C:T	T:T	C:C	T:T	G:G	C:A	A:A	T:C	G:G	A:A	T:C	A:A	C:T	G:G	T:T	G:A	A:A	G:G	T:C	A:C
427	HR_3_265	2019_1st	train set	case	case	G:G	T:T	T:T	G:G	G:G	A:A	G:G	G:G	T:C	T:C	T:T	G:G	A:A	A:A	C:C	T:T	G:G	C:C	A:G	A:A	A:A	A:G	G:A	G:G	T:T	T:T	C:C	T:T	G:G	C:A	A:A	T:T	G:G	T:T	T:C	A:A	C:C	G:G	T:T	No Call	A:A	G:G	T:C	A:A
428	HR_3_216	2019_1st	train set	case	case	G:G	T:T	T:T	G:G	G:G	A:A	G:G	G:G	T:C	T:C	T:T	G:G	A:A	A:A	C:T	T:T	G:G	C:C	A:G	A:A	A:A	G:G	G:A	G:A	T:T	T:T	C:C	T:T	G:G	C:A	A:A	T:T	G:G	T:T	T:C	A:A	C:C	G:G	T:T	G:G	A:A	G:G	T:C	A:A
429	HR_3_257	2019_1st	train set	case	case	G:G	T:T	C:C	G:G	G:G	A:A	G:G	G:G	T:C	T:C	T:T	G:G	A:A	A:A	C:T	T:T	G:G	C:C	A:G	A:A	A:A	A:G	G:A	G:G	T:T	T:T	C:C	T:T	G:G	C:A	A:A	T:C	G:G	T:T	T:C	A:T	C:T	G:T	T:T	G:G	A:A	G:A	T:C	C:C
430	HR_3_249	2019_1st	train set	case	case	G:G	T:T	C:C	G:G	G:G	A:A	G:G	G:G	T:C	T:C	T:T	G:G	A:A	A:A	T:T	T:T	G:G	C:C	A:G	A:A	A:A	A:G	G:A	G:G	C:T	T:T	C:C	T:T	G:G	C:C	A:A	T:C	G:G	T:T	T:C	A:A	C:T	G:G	T:T	G:G	A:A	G:A	T:C	A:C
431	HR_3_200	2019_1st	train set	case	case	G:G	T:T	C:C	G:G	G:G	A:A	G:G	G:G	T:C	T:C	T:T	G:G	A:A	A:A	C:T	T:T	G:G	C:C	A:G	A:A	A:A	A:A	G:A	G:G	T:T	T:T	C:C	T:T	G:G	C:C	A:A	T:C	G:G	T:T	T:C	A:A	C:T	G:G	T:T	G:G	A:A	G:A	T:C	A:C
432	HR_3_241	2019_1st	train set	case	case	G:G	T:T	C:T	G:G	G:G	A:A	G:G	G:G	T:C	T:C	T:T	G:G	A:A	A:A	C:C	T:T	G:G	C:C	A:G	A:A	A:A	A:G	G:A	G:G	C:T	T:T	C:C	T:T	G:G	C:C	A:A	T:T	G:G	A:A	T:C	A:T	C:C	G:G	T:T	G:G	A:A	G:G	T:C	C:C
433	HR_3_287	2019_1st	train set	case	case	G:G	T:T	C:C	G:G	G:G	A:A	G:G	G:G	T:C	T:C	T:T	G:G	A:A	G:G	C:C	T:T	G:G	C:C	A:G	A:A	A:A	A:G	G:A	G:G	C:C	T:A	C:C	T:T	G:G	C:C	A:A	T:T	G:G	A:A	T:C	T:T	C:C	G:G	T:T	G:G	A:A	G:G	T:C	A:A
434	HR_3_234	2019_1st	train set	case	case	G:G	T:T	C:C	G:G	G:G	A:A	G:G	G:G	T:T	T:C	T:T	G:G	A:A	A:A	C:T	T:T	G:G	C:C	A:G	A:A	A:A	A:A	G:A	G:G	T:T	T:T	C:C	T:T	G:G	C:A	A:A	T:C	G:G	T:A	T:C	A:A	C:T	G:G	T:T	G:G	A:A	G:G	T:C	A:C
435	HR_3_279	2019_1st	train set	case	case	G:G	T:T	C:C	G:G	G:G	A:A	G:G	G:G	T:T	T:C	T:T	G:G	A:A	A:A	C:T	T:T	G:G	C:C	A:G	A:A	A:A	A:A	G:A	G:G	T:T	T:T	C:C	T:T	G:G	C:C	A:A	T:T	G:G	T:T	T:C	A:A	C:C	G:T	T:T	A:A	A:A	G:A	T:C	A:C
436	HR_3_226	2019_1st	test set	case	case	G:G	T:T	C:T	G:G	G:G	A:A	G:G	G:G	T:C	T:C	T:T	G:G	A:A	G:G	C:C	T:T	G:G	C:C	A:G	A:A	A:A	A:A	G:A	G:G	C:T	T:A	C:C	T:T	G:G	C:C	A:A	T:C	G:G	A:A	T:C	T:T	C:T	G:G	T:T	G:G	A:A	G:G	T:C	A:C
437	HR_3_271	2019_1st	train set	case	case	G:G	T:T	C:C	G:G	G:G	A:A	G:G	G:G	T:T	T:C	T:T	G:G	A:A	A:A	C:T	T:T	G:G	C:T	G:G	A:A	A:A	A:G	G:A	G:G	T:T	T:T	C:C	T:T	G:G	C:A	A:A	T:T	G:G	T:T	T:C	A:A	C:C	G:T	T:T	G:G	A:A	G:A	T:C	C:C
438	HR_3_218	2019_1st	train set	case	case	G:G	T:T	C:C	G:G	G:G	A:A	G:G	G:G	T:C	T:C	T:T	G:G	A:A	A:A	C:T	T:T	G:G	C:C	A:G	A:A	A:A	A:G	G:A	G:G	C:T	T:T	C:C	T:T	G:G	C:C	A:A	T:C	G:G	T:T	T:C	A:T	C:T	G:T	T:T	A:A	A:A	G:G	T:C	C:C
439	HR_3_263	2019_1st	train set	case	case	G:G	T:T	C:C	G:G	G:G	A:A	G:G	G:G	T:C	T:C	T:T	G:G	A:A	A:A	C:C	T:T	G:G	C:C	A:G	A:A	A:A	A:A	G:A	G:A	C:T	T:T	C:C	T:T	G:G	C:C	A:A	T:C	G:G	T:A	T:C	A:A	C:T	G:G	T:T	G:A	A:A	G:G	T:C	A:C
440	HR_3_210	2019_1st	train set	case	case	G:G	T:T	C:T	G:G	G:G	A:A	G:G	G:G	T:C	T:C	T:T	G:G	A:A	A:A	C:C	T:T	G:G	C:C	A:G	A:A	A:A	A:A	G:A	G:G	C:T	T:A	C:C	T:T	G:G	C:A	A:G	T:C	G:G	A:A	T:C	A:T	C:T	G:G	T:T	G:G	A:A	G:A	T:C	A:C
441	HR_3_255	2019_1st	train set	case	case	G:G	T:T	C:C	G:G	G:G	A:A	G:G	G:G	T:C	T:C	C:C	G:G	A:G	A:A	C:T	T:T	G:G	C:C	A:G	A:A	A:A	A:A	G:A	G:A	C:T	T:T	C:C	T:T	G:G	C:C	A:A	T:C	G:G	T:T	T:C	A:A	C:T	G:G	T:T	G:A	A:A	G:G	T:C	A:C
442	HR_3_202	2019_1st	train set	case	case	G:G	T:T	C:C	G:G	G:G	A:A	G:G	G:G	T:C	T:C	T:T	G:G	A:A	A:A	C:T	T:T	G:G	C:C	A:G	A:A	A:A	A:A	G:A	G:G	T:T	T:T	C:C	T:T	G:G	C:C	A:A	T:C	G:G	T:T	T:C	A:A	C:T	G:T	T:T	A:A	A:A	G:G	T:C	C:C
443	HR_3_247	2019_1st	train set	case	case	G:G	T:T	C:C	G:G	G:G	A:A	G:G	G:G	T:C	T:C	T:C	G:G	A:A	A:A	C:C	T:T	G:G	C:C	A:G	A:A	A:A	A:A	G:A	G:A	C:T	T:T	C:C	T:T	G:G	C:A	A:A	T:C	G:G	A:A	T:C	A:A	C:T	G:G	T:T	G:A	A:A	G:G	T:C	A:C
444	HR_3_194	2019_1st	train set	case	case	G:G	T:T	C:T	G:G	G:G	A:A	G:G	G:G	T:C	T:C	T:T	G:G	A:A	A:G	C:C	T:T	G:G	C:C	A:G	A:A	A:A	A:G	G:A	G:G	C:T	T:T	C:C	T:T	G:G	C:A	A:A	T:T	G:G	A:A	T:C	A:T	C:C	G:G	T:T	G:G	A:A	G:G	T:C	A:C
445	HR_3_239	2019_1st	train set	case	case	G:G	T:T	C:C	G:G	G:G	A:A	G:G	G:G	T:C	T:C	T:T	G:G	A:A	A:A	C:T	T:T	G:G	C:C	A:G	A:A	A:A	A:A	G:A	G:G	C:T	T:T	C:C	T:T	G:G	C:C	A:A	T:T	G:G	A:A	T:C	A:T	C:C	G:T	T:T	A:A	A:A	G:A	T:C	A:C
446	HR_3_231	2019_1st	test set	case	case	G:G	T:T	C:C	G:G	G:G	A:A	G:G	G:T	T:T	T:C	T:T	G:G	A:A	A:A	C:C	T:T	G:G	C:C	A:G	A:A	A:A	A:A	G:A	G:G	C:T	T:T	C:C	T:T	G:G	C:A	A:A	T:C	G:G	T:T	T:C	A:A	C:T	G:G	T:T	G:A	A:G	G:G	T:C	A:C
447	HR_3_274	2019_1st	train set	case	case	G:G	T:T	C:C	G:G	G:G	A:A	G:G	G:G	T:C	T:C	T:T	G:G	A:A	A:A	C:C	T:T	G:G	C:C	A:G	A:A	A:A	A:A	G:A	G:A	C:T	T:T	C:C	T:T	G:G	C:A	A:A	T:C	G:G	T:T	T:C	A:A	C:T	G:G	T:T	G:A	A:A	G:G	T:C	C:C
448	HR_3_223	2019_1st	test set	case	case	G:G	T:T	C:C	G:G	G:G	A:A	G:G	G:G	T:T	T:C	T:T	G:G	A:A	A:A	C:C	T:T	G:G	C:C	A:G	A:A	A:A	A:G	G:A	G:G	T:T	T:T	C:C	T:T	G:G	C:C	A:A	T:T	G:G	T:T	T:C	A:T	C:C	G:T	T:T	G:G	A:A	G:G	T:C	A:C
449	HR_3_266	2019_1st	test set	case	case	G:G	T:T	C:C	G:G	G:G	A:A	G:G	G:G	T:T	T:C	T:T	G:G	A:A	A:A	C:T	T:T	G:G	C:C	A:G	A:A	A:A	A:A	G:A	G:G	C:T	T:T	C:C	T:T	G:G	C:C	A:A	T:C	G:G	T:T	T:C	A:A	C:T	G:T	T:T	G:G	A:A	G:A	T:C	A:C
450	HR_3_215	2019_1st	test set	case	case	G:G	T:T	C:C	G:G	G:G	A:A	G:G	G:G	T:T	T:C	T:C	G:G	A:A	A:A	C:C	T:T	G:G	C:C	A:G	A:A	A:A	A:A	G:A	G:A	C:C	T:T	C:C	T:T	G:G	C:C	A:A	T:C	G:G	T:T	T:C	A:A	C:T	G:G	T:T	G:G	A:G	G:G	T:C	C:C
451	HR_3_258	2019_1st	train set	case	case	No Call	T:T	C:C	G:G	G:G	A:A	G:G	G:G	T:C	T:C	T:T	G:G	A:A	A:A	C:C	T:T	G:G	C:C	A:G	A:A	A:A	A:G	G:A	G:G	C:T	T:T	C:C	T:T	G:G	C:A	A:A	T:C	G:G	A:A	T:C	A:T	C:T	G:T	T:T	G:G	A:A	G:G	T:C	C:C
452	HR_3_250	2019_1st	train set	case	case	G:G	T:T	C:C	G:G	G:G	A:A	G:G	G:T	T:T	T:C	T:T	G:G	A:A	A:A	C:C	T:T	G:G	C:C	A:G	A:A	A:A	A:A	G:A	G:G	C:T	T:T	C:C	T:T	G:G	C:C	A:A	T:C	G:G	T:T	T:C	A:A	C:T	G:G	T:T	G:A	A:G	G:G	T:C	C:C
453	HR_3_199	2019_1st	train set	case	case	G:G	T:T	C:C	G:G	G:G	A:A	G:G	G:G	T:C	T:C	T:T	G:G	A:A	A:A	C:C	T:T	G:G	C:C	A:G	A:A	A:A	A:A	G:A	G:G	C:C	T:T	C:C	T:T	G:G	C:C	A:G	T:C	G:G	A:A	T:C	T:T	C:T	G:G	T:T	G:G	A:A	G:G	T:C	A:C
454	HR_3_242	2019_1st	train set	case	case	G:G	T:T	C:C	G:G	G:G	A:A	G:G	G:T	T:C	T:C	C:C	G:G	A:G	A:A	C:C	T:T	G:G	C:C	A:G	A:A	A:A	A:A	G:A	G:G	C:C	T:T	C:C	T:T	G:G	C:C	A:A	T:C	G:G	T:A	T:C	A:A	C:T	G:G	T:T	G:G	A:A	G:G	T:C	A:C
455	HR_3_235	2019_1st	test set	case	case	G:G	T:T	C:C	G:G	G:G	A:A	G:G	G:T	T:C	T:C	T:T	G:G	A:G	A:A	C:C	T:T	G:G	C:C	A:G	A:A	A:A	A:A	G:A	G:G	C:C	T:T	C:C	T:T	G:G	C:C	A:A	T:C	G:G	A:A	T:C	A:A	C:T	G:G	T:T	G:G	A:A	G:G	T:C	A:C
456	HR_3_227	2019_1st	train set	case	case	G:G	T:T	T:T	G:G	G:G	A:A	G:G	G:G	T:T	T:C	T:T	G:G	A:A	A:A	C:T	T:T	G:G	C:T	G:G	A:A	A:A	A:G	G:A	G:G	T:T	A:A	C:C	T:T	G:G	C:C	A:A	T:T	G:A	T:T	T:C	A:T	C:C	G:G	T:T	G:G	A:A	G:A	T:C	A:C
457	HR_3_270	2019_1st	train set	case	case	G:G	T:T	C:C	G:G	G:G	A:A	G:G	G:G	T:T	T:C	T:T	G:G	A:A	A:A	C:T	T:T	G:G	C:C	G:G	A:A	A:A	A:G	G:A	G:G	T:T	T:T	C:C	T:T	G:G	C:A	A:A	T:C	G:G	A:A	T:C	A:A	C:T	G:G	T:T	G:G	A:A	G:G	T:C	A:C
458	HR_3_254	2019_1st	train set	case	case	G:G	T:T	C:C	G:G	G:G	A:A	G:G	G:G	T:C	T:C	T:T	G:G	A:A	A:A	C:C	T:T	G:G	C:C	A:G	A:A	A:A	A:A	G:A	G:A	C:C	T:T	C:C	T:T	G:G	C:A	A:A	T:C	G:G	T:T	T:C	A:A	C:T	G:G	T:T	G:A	A:A	G:G	T:C	A:C
459	HR_3_203	2019_1st	train set	case	case	G:G	T:T	C:C	G:G	G:G	A:A	G:G	G:T	T:C	T:C	T:C	G:G	A:A	A:A	C:C	T:T	G:G	C:C	A:G	A:A	A:A	A:A	G:A	G:G	C:C	T:T	C:C	T:T	G:G	C:C	A:A	T:C	G:G	T:T	T:C	A:A	C:T	G:G	T:T	G:A	A:A	G:G	T:C	A:C
460	HR_3_246	2019_1st	train set	case	case	G:G	T:T	C:C	G:G	G:G	A:A	G:G	G:G	T:C	T:C	T:C	G:G	A:G	A:A	C:T	T:T	G:G	C:C	A:G	A:A	A:A	A:A	G:A	G:A	C:C	T:T	C:C	T:T	G:G	C:C	A:A	T:C	G:G	T:T	T:C	A:A	C:T	G:G	T:T	G:A	A:A	G:G	T:C	A:C
461	HR_3_195	2019_1st	test set	case	case	G:G	T:T	C:C	G:G	G:G	A:A	G:G	G:G	T:C	T:C	T:T	G:G	A:A	A:G	C:C	T:T	G:G	C:C	A:G	A:A	A:A	A:G	G:A	G:G	C:C	T:T	C:C	T:T	G:G	C:A	A:G	T:T	G:G	A:A	T:C	A:T	C:C	G:G	T:T	G:G	A:A	G:A	T:C	A:C
462	HR_3_283	2019_1st	train set	case	case	G:G	T:T	C:C	G:G	G:G	A:A	G:G	G:T	T:C	T:C	T:C	G:G	A:G	A:A	C:T	T:T	G:G	C:C	A:G	A:A	A:A	A:A	G:A	G:G	C:T	T:T	C:C	T:T	G:G	C:A	A:A	T:C	G:G	T:T	T:C	A:A	C:T	G:G	T:T	G:A	A:A	G:G	T:C	A:C
463	HR_3_230	2019_1st	train set	case	case	G:G	T:T	C:C	G:G	G:G	A:A	G:G	G:G	T:C	T:C	T:T	G:G	A:A	A:A	C:C	T:T	G:G	C:C	A:G	A:A	A:A	A:A	G:A	G:G	C:C	T:T	C:C	T:T	G:G	C:C	A:A	T:C	G:G	A:A	T:C	A:T	C:T	G:G	T:T	G:G	A:G	G:G	T:C	A:C
464	HR_3_275	2019_1st	train set	case	case	G:G	T:T	C:C	G:G	G:G	A:A	G:G	G:G	T:C	T:C	C:C	G:G	A:A	A:A	C:T	T:T	G:G	C:C	A:G	A:A	A:A	A:A	G:A	G:A	C:C	T:T	C:C	T:T	G:G	C:A	A:A	T:C	G:G	T:T	T:C	A:A	C:T	G:G	T:T	G:G	A:A	G:G	T:C	C:C
465	HR_3_222	2019_1st	train set	case	case	G:G	T:T	C:C	C:C	G:G	A:A	G:G	T:T	T:C	T:C	T:T	G:G	A:G	A:A	C:T	T:T	G:G	C:C	A:G	A:A	A:A	A:A	G:A	G:G	C:C	T:T	C:C	T:T	G:G	C:C	A:A	T:T	G:G	T:A	T:C	A:T	C:C	G:G	T:G	G:G	A:A	G:A	T:C	C:C
466	HR_3_267	2019_1st	train set	case	case	G:G	T:T	C:C	G:G	G:G	A:A	G:G	G:G	T:C	T:C	T:T	G:G	A:A	A:A	C:T	T:T	G:G	C:C	A:G	A:A	A:A	A:A	G:A	G:G	T:T	T:T	C:C	T:T	G:G	C:C	A:A	T:T	G:G	T:T	T:C	A:A	C:C	G:T	T:T	G:G	A:A	G:G	T:C	A:C
467	HR_3_214	2019_1st	train set	case	case	G:G	T:T	C:T	G:G	G:G	A:A	G:G	G:G	T:C	T:C	T:T	G:G	A:A	G:G	C:C	T:T	G:G	C:C	A:G	A:A	A:A	A:A	G:A	G:G	C:T	T:T	C:C	T:T	G:G	C:C	A:A	T:T	G:G	A:A	T:C	T:T	C:C	G:G	T:T	G:G	A:A	G:A	T:C	A:A
468	HR_3_206	2019_1st	train set	case	case	G:G	T:T	C:C	G:G	G:G	A:A	G:G	G:G	T:C	T:C	T:T	G:G	A:A	A:A	T:T	T:T	G:G	C:C	A:G	A:A	A:A	A:A	G:A	G:G	T:T	T:T	C:C	T:T	G:G	C:A	A:A	T:C	G:G	T:T	T:C	A:T	C:T	G:G	T:T	G:G	A:A	G:A	T:C	A:C
469	HR_3_251	2019_1st	train set	case	case	G:G	T:T	C:C	G:G	G:G	A:A	G:G	G:G	T:T	T:C	T:T	G:G	A:G	A:A	C:C	T:T	G:G	C:C	A:G	A:A	A:A	A:A	G:A	G:A	C:T	T:T	C:C	T:T	G:G	C:C	A:A	T:C	G:G	A:A	T:C	A:A	C:T	G:G	T:T	G:G	A:G	G:G	T:C	C:C
470	HR_3_198	2019_1st	train set	case	case	G:G	T:T	C:C	G:G	G:G	A:A	G:G	G:G	T:C	T:C	T:T	G:G	A:A	A:A	C:T	T:T	G:G	C:T	G:G	A:A	A:A	A:A	G:A	G:A	C:T	T:T	C:C	T:T	G:G	C:A	A:A	T:C	G:G	T:T	T:C	A:A	C:T	G:G	T:T	G:A	A:G	G:G	T:C	C:C
471	HR_3_243	2019_1st	train set	case	case	G:G	T:T	C:C	G:G	G:G	A:A	G:G	G:G	T:T	T:C	T:T	G:G	A:A	A:A	T:T	T:T	G:G	C:C	A:G	A:A	A:A	A:G	G:A	G:G	C:T	T:T	C:C	T:T	G:G	C:C	A:A	T:T	G:G	T:T	T:C	A:A	C:C	G:T	T:T	G:G	A:A	G:A	T:C	A:C
472	HR_3_236	2019_1st	train set	case	case	G:G	T:T	C:C	G:G	G:G	A:A	G:G	G:T	T:C	T:C	T:C	G:G	A:G	A:A	C:T	T:T	G:G	C:C	A:G	A:A	A:A	A:A	G:A	G:G	C:C	T:T	C:C	T:T	G:G	C:C	A:A	T:C	G:G	T:T	T:C	A:A	C:T	G:G	T:T	G:A	A:A	G:G	T:C	A:C
473	HR_3_277	2019_1st	train set	case	case	G:G	T:T	C:C	G:G	G:G	A:A	G:G	G:G	T:C	T:C	T:T	G:G	A:A	A:A	C:T	T:T	G:G	C:C	A:G	A:A	A:A	A:G	G:A	G:G	C:T	T:T	C:C	T:T	G:G	C:C	A:A	T:T	G:G	T:T	T:C	A:A	C:C	G:G	T:T	G:G	A:A	G:G	T:C	A:A
474	HR_3_228	2019_1st	test set	case	case	G:G	T:T	C:C	G:G	G:G	A:A	G:G	G:G	T:T	T:C	T:T	G:G	A:A	A:A	C:T	T:T	G:G	C:C	A:G	A:A	A:A	A:G	G:A	G:G	T:T	T:T	C:C	T:T	G:G	C:C	A:A	T:T	G:G	T:T	T:C	A:T	C:C	G:T	T:T	G:G	A:A	G:G	T:C	C:C
475	HR_3_269	2019_1st	train set	case	case	G:G	T:T	C:T	G:G	G:G	A:A	G:G	G:G	T:C	T:C	T:T	G:G	A:A	A:A	C:C	T:T	G:G	C:C	A:G	A:A	A:A	A:G	G:A	G:G	C:T	T:T	C:C	T:T	G:G	C:C	A:G	T:T	G:G	A:A	T:C	T:T	C:C	G:G	T:T	G:G	A:A	G:G	T:C	A:C
476	HR_3_220	2019_1st	train set	case	case	G:G	T:T	C:C	G:G	G:G	A:A	G:G	G:T	T:C	T:C	C:C	G:G	A:G	A:A	C:T	T:T	G:G	C:T	G:G	A:A	A:A	A:A	G:A	G:G	C:T	T:T	C:C	T:T	G:G	C:C	A:A	T:C	G:G	T:T	T:C	A:A	C:T	G:G	T:T	G:A	A:A	G:G	T:C	A:C
477	HR_3_261	2019_1st	train set	case	case	G:G	T:T	C:C	G:G	G:G	A:A	G:G	G:T	T:T	T:C	T:C	G:G	A:A	A:A	C:C	T:T	G:G	C:C	A:G	A:A	A:A	A:A	G:A	G:G	C:C	T:T	C:C	T:T	G:G	C:C	A:A	T:C	G:G	T:T	T:C	A:A	C:T	G:G	T:T	G:A	A:G	G:G	T:C	A:C
478	HR_3_212	2019_1st	train set	case	case	G:G	T:T	C:C	G:G	G:G	A:A	G:G	G:G	T:C	T:C	T:C	G:G	A:A	A:A	C:C	T:T	G:G	C:T	G:G	A:A	A:A	A:A	G:A	G:A	C:T	T:T	C:C	T:T	G:G	C:C	A:A	T:C	G:G	A:A	T:C	A:A	C:T	G:G	T:T	G:A	A:A	G:G	T:C	C:C
479	HR_3_253	2019_1st	train set	case	case	G:G	T:T	C:C	G:G	G:G	A:A	G:G	G:G	T:T	T:C	T:T	G:G	A:A	A:A	C:C	T:T	G:G	C:C	A:G	A:A	A:A	A:A	G:A	G:G	C:T	T:T	C:C	T:T	G:G	C:C	A:A	T:T	G:G	T:T	T:C	A:T	C:C	G:G	T:T	G:G	A:A	G:G	T:C	A:A
480	HR_3_245	2019_1st	train set	case	case	G:G	T:T	C:T	G:G	G:G	A:A	G:G	G:G	T:C	T:C	T:T	G:G	A:A	A:A	C:C	T:T	G:G	C:C	A:G	A:A	A:A	A:G	G:A	G:G	C:T	T:A	C:C	T:T	G:G	C:C	A:A	T:T	G:G	A:A	T:C	T:T	C:C	G:G	T:T	G:G	A:A	G:G	T:C	C:C
481	HR_3_196	2019_1st	train set	case	case	G:G	T:T	C:C	G:G	G:G	A:A	G:G	G:G	T:T	T:C	T:T	G:G	A:A	A:A	C:C	T:T	G:G	C:C	A:G	A:A	A:A	A:A	G:A	G:A	C:C	T:T	C:C	T:T	G:G	C:C	A:A	T:C	G:G	T:A	T:C	A:A	C:T	G:G	T:T	G:G	A:G	G:G	T:C	A:C
482	HR_3_237	2019_1st	train set	case	case	G:G	T:T	C:C	G:G	G:G	A:A	G:G	G:G	T:T	T:C	T:T	G:G	A:G	A:A	C:C	T:T	G:G	C:T	G:G	A:A	A:A	A:A	G:A	G:A	C:T	T:T	C:C	T:T	G:G	C:A	A:A	T:C	G:G	T:A	T:C	A:A	C:T	G:G	T:T	G:A	A:G	G:G	T:C	C:C
483	HR_3_284	2019_1st	train set	case	case	G:G	T:T	C:C	G:G	G:G	A:A	G:G	G:G	T:C	T:C	T:T	G:G	A:A	A:A	C:T	T:T	G:G	C:C	A:G	A:A	A:A	A:A	G:A	G:A	C:T	T:T	C:C	T:T	G:G	C:C	A:A	T:C	G:G	T:T	T:C	A:A	C:T	G:G	T:T	G:G	A:A	G:G	T:C	C:C
484	HR_3_229	2019_1st	train set	case	case	G:G	T:T	C:C	G:G	G:G	A:A	G:G	G:G	T:T	T:C	T:T	G:G	A:A	A:A	T:T	T:T	G:G	C:C	A:G	A:A	A:A	A:G	G:A	G:G	C:T	T:T	C:C	T:T	G:G	C:A	A:A	T:C	G:G	T:A	T:C	A:A	C:T	G:T	T:T	G:G	A:A	G:A	T:C	A:C
485	HR_3_276	2019_1st	train set	case	case	G:G	T:T	C:T	G:G	G:G	A:A	G:G	G:G	T:C	T:C	T:T	G:G	A:A	A:A	C:C	T:T	G:G	C:C	A:G	A:A	A:A	A:G	G:A	G:G	C:T	T:A	C:C	T:T	G:G	C:C	A:A	T:T	G:G	T:A	T:C	T:T	C:C	G:G	T:T	G:G	A:A	G:A	T:C	A:C
486	HR_3_221	2019_1st	train set	case	case	G:G	T:T	C:C	G:G	G:G	A:A	G:G	G:G	T:C	T:C	T:C	G:G	A:A	A:A	C:C	T:T	G:G	C:C	A:G	A:A	A:A	A:A	G:A	G:A	C:C	T:T	C:C	T:T	G:G	C:C	A:A	T:C	G:G	T:T	T:C	A:A	C:T	G:G	T:T	G:G	A:A	G:G	T:C	A:A
487	HR_3_213	2019_1st	train set	case	case	G:G	T:T	C:C	G:G	G:G	A:A	G:G	G:T	T:C	T:C	T:T	G:G	A:A	A:A	C:T	T:T	G:G	C:C	A:G	A:A	A:A	A:A	G:A	G:G	C:C	T:T	C:C	T:T	G:G	C:C	A:A	T:C	G:G	T:T	T:C	A:A	C:T	G:G	T:T	G:A	A:A	G:G	T:C	C:C
488	HR_3_260	2019_1st	train set	case	case	G:G	T:T	C:T	G:G	G:G	A:A	G:G	G:G	T:C	T:C	T:T	G:G	A:A	A:A	C:C	T:T	G:G	C:C	A:G	A:A	A:A	A:G	G:A	G:G	C:T	T:T	C:C	T:T	G:G	C:A	A:G	T:C	G:G	A:A	T:C	A:T	C:T	G:G	T:T	G:G	A:A	G:G	T:C	A:C
489	HR_3_205	2019_1st	train set	case	case	G:G	T:T	C:C	G:G	G:G	A:A	G:G	G:G	T:C	T:C	T:T	G:G	A:A	A:A	C:T	T:T	G:G	C:C	A:G	A:A	A:A	A:G	G:A	G:G	C:T	T:T	C:C	T:T	G:G	C:A	A:A	T:C	G:G	A:A	T:C	A:A	C:T	G:G	T:T	A:A	A:A	G:A	T:C	A:C
490	HR_3_244	2019_1st	test set	case	case	G:G	T:T	C:T	G:G	G:G	A:A	G:G	G:G	T:C	T:C	T:T	G:G	A:A	G:G	C:C	T:T	G:G	C:C	A:G	A:A	A:A	A:A	G:A	G:G	C:T	T:A	C:C	T:T	G:G	C:C	A:G	T:C	G:G	A:A	T:C	T:T	C:T	G:G	T:T	G:G	A:G	G:A	T:C	A:C
491	HR_4_384	2019_1st	train set	case	case	G:G	T:T	C:C	G:G	G:G	A:A	G:G	G:T	T:C	T:C	T:C	G:G	A:A	A:A	C:C	T:T	G:G	C:C	A:G	A:A	A:A	A:A	G:A	G:G	C:T	T:T	C:C	T:T	G:G	C:C	A:A	T:C	G:G	T:A	T:C	A:A	C:T	G:G	T:T	G:A	A:A	G:G	T:C	A:A
492	HR_4_376	2019_1st	train set	case	case	G:G	T:T	C:C	G:G	G:G	A:A	G:G	G:T	T:T	T:C	T:C	G:G	A:G	A:A	C:C	T:T	G:G	C:C	G:G	A:A	A:A	A:A	G:A	G:G	C:T	T:T	C:C	T:T	G:G	C:A	A:A	T:C	G:G	T:A	T:C	A:A	C:T	G:G	T:T	G:A	A:G	G:G	T:C	A:C
493	HR_4_368	2019_1st	train set	case	case	G:G	T:T	T:T	G:G	G:G	A:A	G:G	G:G	T:C	T:C	T:T	G:G	A:A	A:A	C:C	T:T	G:G	C:C	A:G	A:A	A:A	A:G	G:A	G:G	T:T	T:T	C:C	T:T	G:G	C:A	A:A	T:C	G:G	T:T	T:C	A:A	C:T	G:G	T:T	G:G	A:A	G:G	T:C	A:C
494	HR_4_360	2019_1st	train set	case	case	G:G	T:T	C:C	G:G	G:G	A:A	G:G	G:G	T:C	T:C	T:C	G:G	A:G	A:A	C:C	T:T	G:G	C:C	A:G	A:A	A:A	A:A	G:A	G:A	C:T	T:T	C:C	T:T	G:G	C:C	A:A	T:C	G:G	A:A	T:C	A:A	C:T	G:G	T:T	G:A	A:A	G:G	T:C	C:C
495	HR_4_305	2019_1st	train set	case	case	G:G	T:T	C:C	G:G	G:G	A:A	G:G	G:T	T:T	T:C	T:T	G:G	A:G	A:A	C:C	T:T	G:G	C:C	A:G	A:A	A:A	A:A	G:A	G:G	C:C	T:T	C:C	T:T	G:G	C:A	A:A	T:C	G:G	T:T	T:C	A:A	C:T	G:G	T:T	G:A	A:G	G:G	T:C	A:A
496	HR_4_352	2019_1st	train set	case	case	G:G	T:T	C:C	G:G	G:G	A:A	G:G	G:T	T:C	T:C	T:T	G:G	A:G	A:A	C:C	T:T	G:G	C:C	A:G	A:A	A:A	A:A	G:A	G:G	C:C	T:T	C:C	T:T	G:G	C:C	A:A	T:C	G:G	A:A	T:C	A:A	C:T	G:G	T:T	G:A	A:A	G:G	T:C	C:C
497	HR_4_297	2019_1st	train set	case	case	G:G	T:T	C:C	G:G	G:G	A:A	G:G	G:T	T:C	T:C	C:C	G:G	A:A	A:A	C:C	T:T	G:G	C:C	A:G	A:A	A:A	A:A	G:A	G:G	C:C	T:T	C:C	T:T	G:G	C:A	A:A	T:C	G:G	A:A	T:C	A:A	T:T	G:G	T:T	A:A	A:A	G:G	T:T	A:C
498	HR_4_289	2019_1st	train set	case	case	G:G	T:T	C:C	G:G	G:G	A:A	G:G	G:T	T:C	T:C	No Call	G:G	A:A	A:A	C:C	T:T	G:G	C:C	A:G	A:A	A:A	A:A	G:A	G:G	C:C	T:T	C:C	T:T	G:G	C:C	A:A	T:C	G:G	T:A	T:C	A:A	T:T	G:G	T:T	G:G	A:G	G:G	T:T	A:A
499	HR_4_336	2019_1st	train set	case	case	G:G	T:T	C:T	G:G	G:G	A:A	G:G	G:G	T:C	T:C	T:T	G:G	A:A	A:G	C:C	T:T	G:G	C:C	A:G	A:A	A:A	A:G	G:A	G:G	C:T	T:A	C:C	T:T	G:G	C:A	A:A	T:T	G:G	A:A	T:C	A:T	C:C	G:G	T:T	G:G	A:A	G:G	T:C	A:C
500	HR_4_377	2019_1st	train set	case	case	G:G	T:T	C:T	G:G	G:G	A:A	G:G	G:G	T:C	T:C	T:T	G:G	A:A	A:A	C:C	T:T	G:G	C:C	A:G	A:A	A:A	A:G	G:A	G:G	C:T	T:A	C:C	T:T	G:G	C:C	A:G	T:C	G:G	A:A	T:C	T:T	C:T	G:G	T:T	G:G	A:A	G:A	T:C	C:C
501	HR_4_328	2019_1st	train set	case	case	G:G	T:T	C:C	G:G	G:G	A:A	G:G	G:G	T:C	T:C	T:T	G:G	A:A	A:A	C:T	T:T	G:G	C:C	A:G	A:A	A:A	A:A	G:A	G:G	T:T	T:T	C:C	T:T	G:A	C:A	A:A	T:C	G:G	A:A	T:C	A:T	C:T	G:G	T:T	G:G	A:A	G:A	T:C	A:C
502	HR_4_369	2019_1st	train set	case	case	G:G	T:T	C:T	G:G	G:G	A:A	G:G	G:G	T:C	T:C	No Call	G:G	A:A	A:A	C:C	T:T	G:G	C:C	A:G	A:A	A:A	A:G	G:A	G:G	C:T	T:A	C:C	T:T	G:G	C:A	A:G	T:C	G:G	T:A	T:C	T:T	C:T	G:G	T:T	G:G	A:G	G:G	T:T	A:A
503	HR_4_312	2019_1st	train set	case	case	G:G	T:T	C:C	G:G	G:G	A:A	G:G	G:T	T:T	T:C	T:T	G:G	A:G	A:A	C:C	T:T	G:G	C:C	A:G	A:A	A:A	A:A	G:A	G:G	C:T	T:T	C:C	T:T	G:G	C:A	A:A	T:C	G:G	A:A	T:C	A:A	C:T	G:G	T:T	G:A	A:G	G:G	T:C	C:C
504	HR_4_353	2019_1st	test set	case	control	G:G	T:T	C:T	G:G	G:G	A:A	G:G	G:G	T:C	T:C	No Call	G:G	A:A	A:A	C:C	T:T	G:G	C:C	A:G	A:A	A:A	A:A	G:A	G:G	C:T	T:T	C:C	T:T	G:G	C:C	A:G	T:T	G:G	T:T	T:C	T:T	C:T	G:T	T:T	A:A	A:A	G:G	T:T	A:C
505	HR_4_304	2019_1st	train set	case	case	G:G	T:T	C:C	G:G	G:G	A:A	G:G	G:G	T:C	T:C	T:T	G:G	A:A	A:A	C:C	T:T	G:G	C:C	A:G	A:A	A:A	A:G	G:A	G:G	C:T	T:T	C:C	T:T	G:A	C:C	A:A	T:C	G:G	T:T	T:C	A:T	C:T	G:T	T:T	G:G	A:A	G:G	T:C	C:C
506	HR_4_345	2019_1st	train set	case	case	G:G	T:T	C:C	G:G	G:G	A:A	G:G	G:T	T:C	T:C	C:C	G:G	A:A	A:A	C:C	T:T	G:G	C:C	A:G	A:A	A:A	A:A	G:A	G:G	C:C	T:T	C:C	T:T	G:G	C:C	A:A	T:C	G:G	T:T	T:C	A:A	T:T	G:G	T:T	A:A	A:A	G:G	T:T	A:C
507	HR_4_296	2019_1st	train set	case	case	G:G	T:T	C:C	G:G	G:G	A:A	G:G	G:T	T:C	T:C	T:T	G:G	A:G	A:A	C:T	T:T	G:G	C:C	A:G	A:A	A:A	A:A	G:A	G:G	C:C	T:T	C:C	T:T	G:G	C:C	A:A	T:C	G:G	A:A	T:C	A:A	C:T	G:G	T:T	G:A	A:A	G:G	T:C	A:C
508	HR_4_337	2019_1st	train set	case	case	G:G	T:T	T:T	G:G	G:G	A:A	G:G	G:G	T:C	T:C	No Call	G:G	A:A	A:A	C:C	T:T	G:G	C:C	A:G	A:A	A:A	A:G	G:A	G:G	T:T	T:T	C:C	T:T	G:G	C:C	A:A	T:T	G:G	T:T	T:C	T:T	C:C	G:G	T:T	No Call	A:A	G:G	T:T	A:A
509	HR_4_330	2019_1st	train set	case	case	G:G	T:T	C:C	G:G	G:G	A:A	G:G	G:T	T:C	T:C	T:C	G:G	A:A	A:A	C:C	T:T	G:G	C:C	G:G	A:A	A:A	A:A	G:A	G:G	C:T	T:T	C:C	T:T	G:G	C:C	A:A	T:C	G:G	T:T	T:C	A:A	C:T	G:G	T:T	G:A	A:A	G:G	T:C	C:C
510	HR_4_375	2019_1st	train set	case	case	G:G	T:T	C:C	G:G	G:G	A:A	G:G	G:G	T:T	T:C	T:T	G:G	A:A	A:A	C:T	T:T	G:G	C:C	A:G	A:A	A:A	A:A	G:A	G:G	C:T	T:T	C:C	T:T	G:A	C:A	A:A	T:T	G:G	A:A	T:C	A:T	C:C	G:G	T:T	G:G	A:A	G:A	T:C	A:C
511	HR_4_367	2019_1st	test set	case	case	G:G	T:T	C:C	C:C	G:G	A:A	G:G	G:T	T:C	T:C	T:T	G:G	A:G	A:A	C:T	T:T	G:G	C:C	A:G	A:A	A:A	A:A	G:A	G:G	C:T	T:T	C:C	T:T	G:G	C:C	A:A	T:C	G:G	A:A	T:C	A:A	C:C	G:G	T:T	A:A	A:G	G:A	T:C	C:C
512	HR_4_314	2019_1st	train set	case	case	G:G	T:T	C:C	G:G	G:G	A:A	G:G	G:T	T:C	T:C	T:T	G:G	A:A	A:A	C:T	T:T	G:G	C:C	A:G	A:A	A:A	A:A	G:A	G:G	C:T	T:T	C:C	T:T	G:G	C:C	A:A	T:C	G:G	A:A	T:C	A:A	C:T	G:G	T:T	G:A	A:A	G:G	T:C	A:C
513	HR_4_359	2019_1st	train set	case	case	G:G	T:T	C:C	G:G	G:G	A:A	G:G	G:G	T:T	T:C	T:T	G:G	A:A	A:A	C:C	T:T	G:G	C:C	A:G	A:A	A:A	A:A	G:A	G:A	C:C	T:T	C:C	T:T	G:G	C:C	A:A	T:C	G:G	T:T	T:C	A:A	C:T	G:G	T:T	G:A	A:G	G:G	T:C	A:C
514	HR_4_351	2019_1st	train set	case	case	G:G	T:T	C:C	G:G	G:G	A:A	G:G	G:T	T:C	T:C	T:C	G:G	A:A	A:A	C:T	T:T	G:G	C:C	A:G	A:A	A:A	A:A	G:A	G:G	C:T	T:T	C:C	T:T	G:G	C:C	A:A	T:C	G:G	T:T	T:C	A:A	C:T	G:G	T:T	G:A	A:A	G:G	T:C	C:C
515	HR_4_298	2019_1st	train set	case	case	G:G	T:T	T:T	G:G	G:G	A:A	G:G	G:G	T:C	T:C	T:T	G:G	A:A	A:A	C:C	T:T	G:G	C:C	A:G	A:A	A:A	A:G	G:A	G:G	T:T	T:T	C:C	T:T	G:G	C:A	A:A	T:T	G:G	A:A	T:C	A:A	C:C	G:G	T:T	A:A	A:A	G:G	T:C	A:C
516	HR_4_343	2019_1st	test set	case	case	G:G	T:T	T:T	G:G	G:G	A:A	G:G	G:G	T:C	T:C	T:T	G:G	A:A	A:A	C:C	T:T	G:G	C:C	A:G	A:A	A:A	A:G	G:A	G:G	T:T	T:T	C:C	T:T	G:G	C:A	A:A	T:T	G:G	T:T	T:C	A:A	C:C	G:G	T:T	A:A	A:A	G:G	T:C	A:A
517	HR_4_290	2019_1st	train set	case	case	G:G	T:T	C:C	G:G	G:G	A:A	G:G	G:G	T:C	T:C	T:C	G:G	A:G	A:A	C:C	T:T	G:G	C:T	G:G	A:A	A:A	A:A	G:A	G:A	C:T	T:T	C:C	T:T	G:G	C:C	A:A	T:C	G:G	T:A	T:C	A:A	C:T	G:G	T:T	G:A	A:A	G:G	T:C	C:C
518	HR_4_378	2019_1st	train set	case	case	G:G	T:T	C:C	G:G	G:G	A:A	G:G	G:G	T:C	T:C	T:T	G:G	A:A	A:A	C:T	T:T	G:G	C:C	A:G	A:A	A:A	A:A	G:A	G:G	T:T	T:T	C:C	T:T	G:G	C:A	A:A	T:C	G:G	T:T	T:C	A:T	C:T	G:G	T:T	G:G	A:A	G:A	T:C	A:C
519	HR_4_327	2019_1st	train set	case	case	G:G	T:T	C:C	G:G	G:G	A:A	G:G	G:G	T:C	T:C	T:T	G:G	A:A	A:A	C:C	T:T	G:G	C:C	A:G	A:A	A:A	A:G	G:A	G:G	C:T	T:T	C:C	T:T	G:A	C:C	A:A	T:C	G:G	A:A	T:C	A:A	C:T	G:G	T:T	A:A	A:A	G:G	T:C	A:A
520	HR_4_319	2019_1st	train set	case	case	G:G	T:T	C:C	G:G	G:G	A:A	G:G	G:G	T:C	T:C	T:T	G:G	A:A	A:A	T:T	T:T	G:G	C:C	A:G	A:A	A:A	A:G	G:A	G:G	T:T	T:T	C:C	T:T	G:A	C:C	A:A	T:C	G:G	A:A	T:C	A:T	C:T	G:G	T:T	A:A	A:A	G:A	T:C	A:C
521	HR_4_362	2019_1st	train set	case	case	G:G	T:T	C:C	G:G	G:G	A:A	G:G	G:T	T:C	T:C	T:T	G:G	A:A	A:A	C:C	T:T	G:G	C:C	G:G	A:A	A:A	A:A	G:A	G:G	C:T	T:T	C:C	T:T	G:G	C:C	A:A	T:C	G:G	A:A	T:C	A:A	C:T	G:G	T:T	G:A	A:A	G:G	T:C	C:C
522	HR_4_311	2019_1st	train set	case	case	G:G	T:T	C:C	G:G	G:G	A:A	G:G	G:G	T:C	T:C	T:T	G:G	A:A	G:G	C:C	T:T	G:G	C:C	A:G	A:A	A:A	A:G	G:A	G:G	C:C	T:A	C:C	T:T	G:G	C:C	A:A	T:T	G:G	A:A	T:C	T:T	C:C	G:G	T:T	G:G	A:A	G:A	T:C	A:C
523	HR_4_354	2019_1st	test set	case	case	G:G	T:T	C:C	G:G	G:G	A:A	G:G	G:G	T:C	T:C	T:T	G:G	A:A	A:A	C:T	T:T	G:G	C:C	A:G	A:A	A:A	A:A	G:A	G:G	C:T	T:T	C:C	T:T	G:G	C:A	A:A	T:C	G:G	T:T	T:C	A:A	C:T	G:G	T:T	A:A	A:A	G:G	T:C	A:A
524	HR_4_346	2019_1st	train set	case	case	G:G	T:T	C:C	G:G	G:G	A:A	G:G	G:G	T:C	T:C	T:T	G:G	A:G	A:A	C:C	T:T	G:G	C:C	A:G	A:A	A:A	A:A	G:A	G:A	C:C	T:T	C:C	T:T	G:G	C:C	A:A	T:C	G:G	T:T	T:C	A:A	C:T	G:G	T:T	G:A	A:G	G:G	T:C	A:C
525	HR_4_295	2019_1st	test set	case	case	G:G	T:T	C:C	G:G	G:G	A:A	G:G	G:G	T:C	T:C	T:T	G:G	A:A	A:A	C:C	T:T	G:G	C:C	A:G	A:A	A:A	A:A	G:A	G:G	C:T	T:T	C:C	T:T	G:G	C:C	A:A	T:C	G:G	T:A	T:C	A:A	C:T	G:T	T:T	A:A	A:A	G:G	T:C	C:C
526	HR_4_338	2019_1st	train set	case	case	G:G	T:T	T:T	G:G	G:G	A:A	G:G	G:G	T:C	T:C	T:T	G:G	A:A	A:A	C:C	T:T	G:G	C:C	A:G	A:A	A:A	A:G	G:A	G:G	T:T	T:T	C:C	T:T	G:G	C:A	A:A	T:C	G:G	T:T	T:C	A:T	C:T	G:G	T:T	G:G	A:G	G:G	T:C	A:C
527	HR_4_382	2019_1st	train set	case	case	G:G	T:T	C:C	G:G	G:G	A:A	G:G	G:G	T:C	T:C	T:T	G:G	A:A	A:A	C:C	T:T	G:G	C:C	A:G	A:A	A:A	A:A	G:A	G:G	C:C	T:A	C:C	T:T	G:G	C:C	A:G	T:C	G:G	A:A	T:C	T:T	C:T	G:G	T:T	G:G	A:G	G:A	T:C	C:C
528	HR_4_331	2019_1st	train set	case	case	G:G	T:T	C:T	G:G	G:G	A:A	G:G	G:G	T:T	T:C	T:T	G:G	A:A	A:A	C:T	T:T	G:G	C:C	A:G	A:A	A:A	A:A	G:A	G:G	C:T	T:T	C:C	T:T	G:G	C:A	A:A	T:T	G:G	T:T	T:C	A:T	C:T	G:T	T:G	A:A	A:A	G:G	T:C	A:C
529	HR_4_374	2019_1st	train set	case	case	G:G	T:T	C:C	G:G	G:G	A:A	G:G	G:T	T:C	T:C	T:C	G:G	A:G	A:A	C:C	T:T	G:G	C:C	A:G	A:A	A:A	A:A	G:A	G:G	C:T	T:T	C:C	T:T	G:G	C:A	A:A	T:C	G:G	A:A	T:C	A:A	C:T	G:G	T:T	G:A	A:A	G:G	T:C	C:C
530	HR_4_323	2019_1st	train set	case	case	G:G	T:T	C:C	G:G	G:G	A:A	G:G	G:G	T:C	T:C	T:C	G:G	A:G	A:A	C:C	T:T	G:G	C:C	A:G	A:A	A:A	A:A	G:A	G:A	C:C	T:T	C:C	T:T	G:G	C:C	A:A	T:C	G:G	T:T	T:C	A:A	C:T	G:G	T:T	G:A	A:A	G:G	T:C	A:C
531	HR_4_315	2019_1st	train set	case	case	G:G	T:T	C:C	G:G	G:G	A:A	G:G	G:G	T:C	T:C	T:T	G:G	A:A	A:A	T:T	T:T	G:G	C:C	A:G	A:A	A:A	A:A	G:A	G:G	C:T	T:T	C:C	T:T	G:A	C:A	A:A	T:T	G:G	A:A	T:C	A:A	C:C	G:G	T:T	A:A	A:A	G:A	T:C	A:C
532	HR_4_307	2019_1st	train set	case	case	G:G	T:T	C:C	G:G	G:G	A:A	G:G	G:G	T:C	T:C	T:T	G:G	A:A	A:A	C:C	T:T	G:G	C:C	A:G	A:A	A:A	A:G	G:A	G:G	C:C	T:A	C:C	T:T	G:G	C:C	A:A	T:T	G:G	A:A	T:C	T:T	C:C	G:G	T:T	G:G	A:A	G:G	T:C	A:A
533	HR_4_350	2019_1st	train set	case	case	G:G	T:T	C:C	G:G	G:G	A:A	G:G	G:G	T:C	T:C	T:T	G:G	A:A	A:A	C:T	T:T	G:G	C:C	A:G	A:A	A:A	A:A	G:A	G:A	C:C	T:T	C:C	T:T	G:G	C:A	A:A	T:C	G:G	T:T	T:C	A:A	C:T	G:G	T:T	G:A	A:A	G:G	T:C	A:C
534	HR_4_291	2019_1st	train set	case	case	G:G	T:T	C:C	G:G	G:G	A:A	G:G	G:G	T:C	T:C	T:T	G:G	A:A	A:A	C:C	T:T	G:G	C:C	A:G	A:A	A:A	A:G	G:A	G:G	C:C	T:A	C:C	T:T	G:G	C:C	A:A	T:T	G:G	A:A	T:C	T:T	C:C	G:G	T:T	G:G	A:A	G:G	T:C	A:C
535	HR_4_379	2019_1st	test set	case	case	G:G	T:T	C:T	G:G	G:G	A:A	G:G	G:G	T:C	T:C	T:T	G:G	A:A	A:A	C:C	T:T	G:G	C:C	A:G	A:A	A:A	A:A	G:A	G:G	C:T	T:A	C:C	T:T	G:G	C:A	A:A	T:C	G:G	A:A	T:C	A:T	C:T	G:G	T:T	G:G	A:G	G:G	T:C	C:C
536	HR_4_326	2019_1st	train set	case	case	No Call	T:T	C:C	G:G	G:G	A:A	G:G	G:T	T:C	T:C	T:C	G:G	A:A	A:A	C:T	T:T	G:G	C:C	A:G	A:A	A:A	A:A	G:A	G:G	C:C	T:T	C:C	T:T	G:G	C:A	A:A	T:C	G:G	T:T	T:C	A:A	C:T	G:G	T:T	G:A	A:A	G:G	T:C	C:C
537	HR_4_371	2019_1st	train set	case	case	G:G	T:T	C:C	G:G	G:G	A:A	G:G	G:G	T:C	T:C	T:T	G:G	A:A	A:A	C:C	T:T	G:G	C:C	A:G	A:A	A:A	A:G	G:A	G:G	C:T	T:T	C:C	T:T	G:A	C:C	A:A	T:T	G:G	T:T	T:C	A:T	C:C	G:G	T:T	G:G	A:A	G:G	T:C	A:C
538	HR_4_318	2019_1st	train set	case	case	G:G	T:T	C:C	G:G	G:G	A:A	G:G	G:G	T:C	T:C	T:C	G:G	A:G	A:A	C:C	T:T	G:G	C:C	A:G	A:A	A:A	A:A	G:A	G:A	C:C	T:T	C:C	T:T	G:G	C:A	A:A	T:C	G:G	T:T	T:C	A:A	C:T	G:G	T:T	G:A	A:A	G:G	T:C	C:C
539	HR_4_310	2019_1st	train set	case	case	G:G	T:T	C:C	G:G	G:G	A:A	G:G	G:T	T:C	T:C	T:T	G:G	A:A	A:A	C:C	T:T	G:G	C:C	G:G	A:A	A:A	A:A	G:A	G:G	C:T	T:T	C:C	T:T	G:G	C:C	A:A	T:C	G:G	T:A	T:C	A:A	C:T	G:G	T:T	G:A	A:A	G:G	T:C	A:C
540	HR_4_355	2019_1st	train set	case	case	G:G	T:T	C:C	G:G	G:G	A:A	G:G	G:G	T:C	T:C	T:T	G:G	A:A	G:G	C:C	T:T	G:G	C:C	A:G	A:A	A:A	A:G	G:A	G:G	C:C	T:A	C:C	T:T	G:G	C:C	A:A	T:T	G:G	T:A	T:C	T:T	C:C	G:G	T:T	G:A	A:G	G:G	T:C	A:C
541	HR_4_302	2019_1st	train set	case	case	G:G	T:T	C:C	G:G	G:G	A:A	G:G	G:T	T:C	T:C	T:C	G:G	A:A	A:A	C:C	T:T	G:G	C:C	A:G	A:A	A:A	A:A	G:A	G:G	C:C	T:T	C:C	T:T	G:G	C:C	A:A	T:C	G:G	T:A	T:C	A:A	C:T	G:G	T:T	G:G	A:A	G:G	T:C	A:C
542	HR_4_294	2019_1st	train set	case	case	G:G	T:T	C:C	G:G	G:G	A:A	G:G	G:T	T:C	T:C	T:T	G:G	A:G	A:A	C:C	T:T	G:G	C:T	G:G	A:A	A:A	A:A	G:A	G:G	C:T	T:T	C:C	T:T	G:G	C:C	A:A	T:C	G:G	A:A	T:C	A:A	C:T	G:G	T:T	G:A	A:A	G:G	T:C	A:C
543	HR_4_339	2019_1st	train set	case	case	G:G	T:T	C:C	G:G	G:G	A:A	G:G	G:T	T:C	T:C	T:C	G:G	A:G	A:A	C:T	T:T	G:G	C:C	G:G	A:A	A:A	A:A	G:A	G:G	C:T	T:T	C:C	T:T	G:G	C:A	A:A	T:C	G:G	T:T	T:C	A:A	C:T	G:G	T:T	G:A	A:A	G:G	T:C	A:C
544	HR_4_381	2019_1st	test set	case	case	G:G	T:T	C:C	G:G	G:G	A:A	G:G	G:G	T:T	T:C	T:T	G:G	A:A	A:A	C:T	T:T	G:G	C:C	A:G	A:A	A:A	A:G	G:A	G:G	C:T	T:T	C:C	T:T	G:G	C:A	A:A	T:T	G:G	T:T	T:C	A:A	C:C	G:T	T:T	G:G	A:A	G:A	T:C	C:C
545	HR_4_332	2019_1st	train set	case	case	G:G	T:T	C:C	G:G	G:G	A:A	G:G	G:T	T:T	T:C	T:T	G:G	A:A	A:A	C:C	T:T	G:G	C:C	A:G	A:A	A:A	A:A	G:A	G:G	C:T	T:T	C:C	T:T	G:G	C:A	A:A	T:C	G:G	T:T	T:C	A:A	C:T	G:G	T:T	G:A	A:G	G:G	T:C	A:C
546	HR_4_373	2019_1st	train set	case	case	G:G	T:T	C:T	G:G	G:G	A:A	G:G	G:G	T:C	T:C	T:T	G:G	A:A	A:A	C:C	T:T	G:G	C:C	A:G	A:A	A:A	A:G	G:A	G:G	C:T	T:T	C:C	T:T	G:G	C:C	A:A	T:T	G:G	A:A	T:C	A:T	C:C	G:G	T:T	G:G	A:A	G:A	T:C	A:A
547	HR_4_324	2019_1st	train set	case	case	G:G	T:T	C:C	G:G	G:G	A:A	G:G	G:T	T:C	T:C	T:T	G:G	A:G	A:A	C:C	T:T	G:G	C:T	G:G	A:A	A:A	A:A	G:A	G:G	C:T	T:T	C:C	T:T	G:G	C:C	A:A	T:C	G:G	T:T	T:C	A:A	C:T	G:G	T:T	G:A	A:A	G:G	T:C	C:C
548	HR_4_316	2019_1st	train set	case	case	G:G	T:T	C:C	G:G	G:G	A:A	G:G	G:T	T:C	T:C	T:T	G:G	A:A	A:A	C:C	T:T	G:G	C:C	A:G	A:A	A:A	A:A	G:A	G:G	C:T	T:T	C:C	T:T	G:G	C:C	A:A	T:C	G:G	A:A	T:C	A:A	C:T	G:G	T:T	G:A	A:G	G:G	T:C	C:C
549	HR_4_357	2019_1st	train set	case	case	G:G	T:T	C:C	G:C	G:G	A:A	G:G	G:T	T:C	T:C	T:T	G:G	A:A	A:A	C:T	T:T	G:G	C:C	A:G	A:A	A:A	A:A	G:A	G:G	C:T	T:T	C:C	T:T	G:G	C:C	A:A	T:T	G:G	A:A	T:C	A:A	C:C	G:G	T:G	A:A	A:G	G:A	T:C	A:C
550	HR_4_308	2019_1st	train set	case	case	G:G	T:T	C:C	G:G	G:G	A:A	G:G	G:G	T:C	T:C	T:T	G:G	A:A	A:A	T:T	T:T	G:G	C:C	A:G	A:A	A:A	A:G	G:A	G:G	C:T	T:T	C:C	T:T	G:G	C:A	A:A	T:T	G:G	A:A	T:C	A:T	C:C	G:G	T:T	A:A	A:A	G:A	T:C	A:A
551	HR_4_349	2019_1st	train set	case	case	G:G	T:T	C:C	G:G	G:G	A:A	G:G	G:G	T:T	T:C	T:T	G:G	A:A	A:A	C:T	T:T	G:G	C:C	A:G	A:A	A:A	A:A	G:A	G:G	C:T	T:T	C:C	T:T	G:G	C:A	A:A	T:T	G:G	A:A	T:C	A:A	C:C	G:T	T:T	G:G	A:A	G:A	T:C	A:C
552	HR_4_300	2019_1st	test set	case	case	G:G	T:T	C:T	G:G	G:G	A:A	G:G	G:G	T:C	T:C	T:T	G:G	A:A	A:A	C:C	T:T	G:G	C:C	A:G	A:A	A:A	G:G	G:A	G:A	T:T	T:A	C:C	T:T	G:A	C:A	A:A	T:T	G:G	T:T	T:C	A:T	C:C	G:G	T:T	A:A	A:A	G:G	T:C	A:A
553	HR_4_341	2019_1st	train set	case	case	G:G	T:T	C:T	G:G	G:G	A:A	G:G	G:G	T:C	T:C	T:T	G:G	A:A	A:G	C:C	T:T	G:G	C:C	A:G	A:A	A:A	A:A	G:A	G:G	C:T	T:T	C:C	T:T	G:G	C:A	A:A	T:T	G:G	A:A	T:C	A:T	C:C	G:G	T:T	G:G	A:A	G:G	T:C	C:C
554	HR_4_292	2019_1st	train set	case	case	G:G	T:T	C:C	G:G	G:G	A:A	G:G	G:G	T:C	T:C	T:T	G:G	A:A	A:A	C:T	T:T	G:G	C:C	A:G	A:A	A:A	A:A	G:A	G:G	C:T	T:T	C:C	T:T	G:A	C:C	A:A	T:T	G:G	T:T	T:C	A:T	C:C	G:T	T:T	G:G	A:A	G:G	T:C	C:C
555	HR_4_333	2019_1st	train set	case	case	G:G	T:T	C:T	G:G	G:G	A:A	G:G	G:G	T:C	T:C	T:T	G:G	A:A	A:A	C:C	T:T	G:G	C:C	A:G	A:A	A:A	A:A	G:A	G:G	C:T	T:A	C:C	T:T	G:G	C:A	A:G	T:C	G:G	T:A	T:C	A:T	C:T	G:G	T:T	G:G	A:A	G:A	T:C	A:A
556	HR_4_380	2019_1st	train set	case	case	G:G	T:T	C:T	G:G	G:G	A:A	G:G	G:G	T:C	T:C	T:T	G:G	A:A	A:A	C:C	T:T	G:G	C:C	A:G	A:A	A:A	A:G	G:A	G:G	C:T	T:T	C:C	T:T	G:G	C:A	A:G	T:T	G:G	T:A	T:C	A:T	C:C	G:G	T:T	G:G	A:A	G:G	T:C	A:C
557	HR_4_325	2019_1st	train set	case	case	G:G	T:T	C:C	G:G	G:G	A:A	G:G	G:G	T:C	T:C	T:T	G:G	A:A	A:A	C:T	T:T	G:G	C:C	A:G	A:A	A:A	G:G	G:A	G:A	T:T	T:A	C:C	T:T	G:A	C:C	A:A	T:T	G:G	T:T	T:C	T:T	C:C	G:G	T:T	G:G	A:A	G:G	T:C	A:C
558	HR_4_372	2019_1st	train set	case	case	G:G	T:T	C:C	G:G	G:G	A:A	G:G	G:G	T:C	T:C	T:T	G:G	A:A	A:A	C:C	T:T	G:G	C:C	A:G	A:A	A:A	A:G	G:A	G:G	C:C	T:A	C:C	T:T	G:G	C:A	A:G	T:T	G:G	T:A	T:C	A:T	C:C	G:G	T:T	G:G	A:G	G:A	T:C	A:C
559	HR_4_317	2019_1st	test set	case	case	G:G	T:T	C:C	G:G	G:G	A:A	G:G	G:T	T:C	T:C	T:C	G:G	A:G	A:A	C:C	T:T	G:G	C:C	A:G	A:A	A:A	A:A	G:A	G:G	C:C	T:T	C:C	T:T	G:G	C:C	A:A	T:C	G:G	T:T	T:C	A:A	C:T	G:G	T:T	G:A	A:A	G:G	T:C	A:C
560	HR_4_364	2019_1st	test set	case	case	G:G	T:T	C:C	G:G	G:G	A:A	G:G	G:G	T:C	T:C	T:T	G:G	A:A	A:A	C:C	T:T	G:G	C:C	A:G	A:A	A:A	A:A	G:A	G:G	C:C	T:T	C:C	T:T	G:G	C:A	A:A	T:C	G:G	A:A	T:C	A:T	C:T	G:G	T:T	G:G	A:G	G:G	T:C	C:C
561	HR_4_309	2019_1st	train set	case	case	G:G	T:T	C:T	G:G	G:G	A:A	G:G	G:G	T:C	T:C	T:T	G:G	A:A	A:A	C:C	T:T	G:G	C:C	A:G	A:A	A:A	A:G	G:A	G:G	C:T	T:A	C:C	T:T	G:G	C:C	A:G	T:T	G:G	A:A	T:C	T:T	C:C	G:G	T:T	G:G	A:A	G:G	T:C	A:C
562	HR_4_301	2019_1st	train set	case	case	G:G	T:T	C:C	G:G	G:G	A:A	G:G	G:G	T:T	T:C	T:T	G:G	A:A	A:A	C:T	T:T	G:G	C:C	A:G	A:A	A:A	A:A	G:A	G:A	C:C	T:T	C:C	T:T	G:G	C:A	A:A	T:C	G:G	T:A	T:C	A:A	C:T	G:G	T:T	G:A	A:G	G:G	T:C	A:C
563	HR_4_348	2019_1st	train set	case	case	G:G	T:T	T:T	G:G	G:G	A:A	G:G	G:G	T:C	T:C	T:T	G:G	A:A	A:A	C:C	T:T	G:G	C:C	A:G	A:A	A:A	A:G	G:A	G:A	T:T	T:T	C:C	T:T	G:A	C:A	A:A	T:T	G:G	T:T	T:C	A:T	C:C	G:G	T:T	A:A	A:A	G:G	T:C	A:C
564	HR_4_293	2019_1st	train set	case	case	G:G	T:T	C:C	G:G	G:G	A:A	G:G	G:G	T:T	T:C	T:T	G:G	A:A	A:A	C:T	T:T	G:G	C:C	A:G	A:A	A:A	A:G	G:A	G:G	C:T	T:T	C:C	T:T	G:G	C:C	A:A	T:C	G:G	A:A	T:C	A:T	C:T	G:G	T:T	A:A	A:A	G:G	T:C	A:A
565	HR_4_340	2019_1st	train set	case	case	G:G	T:T	T:T	G:G	G:G	A:A	G:G	G:G	T:C	T:C	T:T	G:G	A:A	G:G	C:T	T:T	G:G	C:C	A:G	A:A	A:A	G:G	G:A	G:G	T:T	A:A	C:C	T:T	G:G	C:C	A:A	T:T	G:A	T:T	T:C	A:T	C:C	G:G	T:T	G:G	A:A	G:A	T:C	C:C
566	HR_5_480	2019_1st	train set	case	case	G:G	T:T	C:T	G:G	G:G	A:A	G:G	G:G	T:C	T:C	T:T	G:G	A:A	A:A	C:C	T:T	G:G	C:T	A:G	A:A	A:A	No Call	G:A	G:G	C:T	T:T	C:C	T:T	G:G	C:A	A:A	T:T	G:G	A:A	T:C	A:T	C:C	G:G	T:T	G:G	A:A	G:G	T:C	A:A
567	HR_5_425	2019_1st	train set	case	case	G:G	T:T	C:C	G:G	G:G	A:A	G:G	G:T	T:T	T:C	T:C	G:G	A:A	A:A	C:C	T:T	G:G	C:T	A:G	A:A	A:A	A:A	G:A	G:G	C:C	T:T	C:C	T:T	G:G	C:C	A:A	T:C	G:G	T:A	T:C	A:A	C:T	G:G	T:T	G:A	A:G	G:G	T:C	A:C
568	HR_5_472	2019_1st	train set	case	case	G:G	T:T	C:C	G:G	G:G	A:A	G:G	G:G	T:C	T:C	T:T	G:G	A:A	A:A	C:C	T:T	G:G	C:T	G:G	A:A	A:A	A:A	G:A	G:A	C:T	T:T	C:C	T:T	G:G	C:C	A:A	T:C	G:G	T:T	T:C	A:A	C:T	G:G	T:T	G:A	A:A	G:G	T:C	A:C
569	HR_5_464	2019_1st	train set	case	case	G:G	T:T	C:C	G:G	G:G	A:A	G:G	G:T	T:C	T:C	T:C	G:G	A:G	A:A	C:T	T:T	G:G	C:T	A:G	A:A	A:A	A:A	G:A	G:G	C:C	T:T	C:C	T:T	G:G	C:C	A:A	T:C	G:G	T:T	T:C	A:A	C:T	G:G	T:T	G:G	A:A	G:G	T:C	A:C
570	HR_5_456	2019_1st	train set	case	case	G:G	T:T	C:C	G:G	G:G	A:A	G:G	G:G	T:T	T:C	T:T	G:G	A:A	A:A	C:T	T:T	G:G	C:T	A:G	A:A	A:A	A:A	G:A	G:G	T:T	T:T	C:C	T:T	G:G	C:A	A:A	T:C	G:G	T:T	T:C	A:A	C:T	G:G	T:T	G:G	A:A	G:A	T:C	A:A
571	HR_5_448	2019_1st	train set	case	case	G:G	T:T	C:C	G:G	G:G	A:A	G:G	G:G	T:C	T:C	T:C	G:G	A:G	A:A	C:T	T:T	G:G	C:T	A:G	A:A	A:A	A:A	G:A	G:A	C:T	T:T	C:C	T:T	G:G	C:A	A:A	T:C	G:G	T:T	T:C	A:A	C:T	G:G	T:T	G:A	A:A	G:G	T:C	A:C
572	HR_5_440	2019_1st	train set	case	case	G:G	T:T	T:T	G:G	G:G	A:A	G:G	G:G	T:C	T:C	T:T	G:G	A:A	A:A	C:C	T:T	G:G	C:T	A:G	A:A	A:A	A:G	G:A	G:G	T:T	T:T	C:C	T:T	G:G	C:C	A:A	T:C	G:G	T:T	T:C	A:T	C:T	G:G	T:T	G:G	A:A	G:G	T:C	A:C
573	HR_5_385	2019_1st	train set	case	case	G:G	T:T	C:C	G:G	G:G	A:A	G:G	G:G	T:C	T:C	T:C	G:G	A:A	A:A	C:T	T:T	G:G	C:T	G:G	A:A	A:A	A:A	G:A	G:A	C:T	T:T	C:C	T:T	G:G	C:A	A:A	T:C	G:G	T:T	T:C	A:A	C:T	G:G	T:T	G:G	A:A	G:G	T:C	A:C
574	HR_5_432	2019_1st	train set	case	case	G:G	T:T	C:C	G:G	G:G	A:A	G:G	G:G	T:C	T:C	T:T	G:G	A:A	A:A	C:C	T:T	G:G	C:T	A:G	A:A	A:A	A:A	G:A	G:G	C:T	T:A	C:C	T:T	G:G	C:C	A:A	T:C	G:G	A:A	T:C	T:T	C:T	G:G	T:T	G:G	A:A	G:A	T:C	C:C
575	HR_5_473	2019_1st	train set	case	case	G:G	T:T	C:C	G:G	G:G	A:A	G:G	G:T	T:C	T:C	T:T	G:G	A:G	A:A	T:T	T:T	G:G	C:T	A:G	A:A	A:A	A:A	G:A	G:G	C:C	T:T	C:C	T:T	G:G	C:C	A:A	T:C	G:G	T:A	T:C	A:T	C:C	G:G	T:G	G:A	A:G	A:A	T:C	A:C
576	HR_5_424	2019_1st	train set	case	case	G:G	T:T	C:C	G:G	G:G	A:A	G:G	G:G	T:C	T:C	T:T	G:G	A:A	A:A	C:T	T:T	G:G	C:T	A:G	A:A	A:A	A:A	G:A	G:A	C:T	T:T	C:C	T:T	G:G	C:A	A:A	T:C	G:G	T:A	T:C	A:A	C:T	G:G	T:T	G:A	A:A	G:G	T:C	C:C
577	HR_5_465	2019_1st	train set	case	case	G:G	T:T	C:C	G:G	G:G	A:A	G:G	G:G	T:T	T:C	T:T	G:G	A:A	A:A	C:C	T:T	G:G	C:T	A:G	A:A	A:A	A:A	G:A	G:G	T:T	T:T	C:C	T:T	G:A	C:A	A:A	T:C	G:G	T:T	T:C	A:T	C:T	G:T	T:T	G:G	A:A	G:G	T:C	C:C
578	HR_5_416	2019_1st	train set	case	case	G:G	T:T	C:C	G:G	G:G	A:A	G:G	G:G	T:T	T:C	T:T	G:G	A:A	A:A	C:T	T:T	G:G	C:T	A:G	A:A	A:A	A:G	G:A	G:G	C:T	T:T	C:C	T:T	G:A	C:A	A:A	T:T	G:G	T:T	T:C	A:A	C:C	G:T	T:T	A:A	A:A	G:G	T:C	C:C
579	HR_5_457	2019_1st	train set	case	case	G:G	T:T	C:C	G:G	G:G	A:A	G:G	G:G	T:T	T:C	T:T	G:G	A:A	A:A	T:T	T:T	G:G	C:T	A:G	A:A	A:A	A:A	G:A	G:G	C:T	T:T	C:C	T:T	G:G	C:A	A:A	T:T	G:G	T:T	T:C	A:T	C:C	G:G	T:T	G:G	A:A	G:A	T:C	A:A
580	HR_5_408	2019_1st	train set	case	case	G:G	T:T	C:T	G:G	G:G	A:A	G:G	G:G	T:C	T:C	T:T	G:G	A:A	A:A	C:C	T:T	G:G	C:T	A:G	A:A	A:A	A:G	G:A	G:G	T:T	T:T	C:C	T:T	G:A	C:C	A:A	T:T	G:G	T:T	T:C	T:T	C:C	G:G	T:T	A:A	A:A	G:G	T:C	A:C
581	HR_5_449	2019_1st	train set	case	case	G:G	T:T	C:T	G:G	G:G	A:A	G:G	G:G	T:C	T:C	T:T	G:G	A:A	G:G	C:C	T:T	G:G	C:T	A:G	A:A	A:A	A:G	G:A	G:G	C:T	T:A	C:C	T:T	G:G	C:C	A:G	T:T	G:G	A:A	T:C	T:T	C:C	G:G	T:T	G:G	A:A	G:A	T:C	C:C
582	HR_5_400	2019_1st	train set	case	case	G:G	T:T	C:C	G:G	G:G	A:A	G:G	G:G	T:C	T:C	T:T	G:G	A:A	A:A	T:T	T:T	G:G	C:T	A:G	A:A	A:A	A:G	G:A	G:G	T:T	T:T	C:C	T:T	G:A	C:A	A:A	T:T	G:G	A:A	T:C	A:T	C:C	G:G	T:T	G:G	A:A	G:A	T:C	A:C
583	HR_5_392	2019_1st	train set	case	case	G:G	T:T	C:C	G:G	G:G	A:A	G:G	G:T	T:C	T:C	T:C	G:G	A:G	A:A	C:C	T:T	G:G	C:T	A:G	A:A	A:A	A:A	G:A	G:G	C:C	T:T	C:C	T:T	G:G	C:C	A:A	T:C	G:G	A:A	T:C	A:A	C:T	G:G	T:T	G:G	A:A	G:G	T:C	A:C
584	HR_5_433	2019_1st	train set	case	case	G:G	T:T	C:C	G:C	G:G	A:A	G:G	G:T	T:C	T:C	T:T	G:G	A:A	A:A	C:C	T:T	G:G	C:T	A:G	A:A	A:A	A:A	G:A	G:G	C:T	T:T	C:C	T:T	G:G	C:C	A:A	T:T	G:G	A:A	T:C	A:T	C:C	G:G	T:G	A:A	A:A	G:G	T:C	A:C
585	HR_5_479	2019_1st	train set	case	case	G:G	T:T	C:C	G:G	G:G	A:A	G:G	G:G	T:C	T:C	T:T	G:G	A:A	A:A	C:C	T:T	G:G	C:T	A:G	A:A	A:A	G:G	G:A	G:A	T:T	T:T	C:C	T:T	G:A	C:C	A:A	T:T	G:G	T:A	T:C	A:T	C:C	G:G	T:T	A:A	A:A	G:G	T:C	A:C
586	HR_5_426	2019_1st	train set	case	case	G:G	T:T	C:C	G:G	G:G	A:A	G:G	G:T	T:C	T:C	T:T	G:G	A:A	A:A	C:T	T:T	G:G	C:T	A:G	A:A	A:A	A:A	G:A	G:G	C:C	T:T	C:C	T:T	G:G	C:C	A:A	T:C	G:G	A:A	T:C	A:A	C:C	G:G	T:T	A:A	A:A	G:A	T:C	C:C
587	HR_5_463	2019_1st	train set	case	case	G:G	T:T	C:T	G:G	G:G	A:A	G:G	G:G	T:C	T:C	T:T	G:G	A:A	A:A	C:C	T:T	G:G	C:T	A:G	A:A	A:A	A:A	G:A	G:G	C:T	T:T	C:C	T:T	G:G	C:A	A:G	T:C	G:G	A:A	T:C	A:T	C:T	G:G	T:T	G:G	A:A	G:G	T:C	A:C
588	HR_5_410	2019_1st	train set	case	case	G:G	T:T	C:C	G:G	G:G	A:A	G:G	G:G	T:C	T:C	T:T	G:G	A:A	A:A	C:T	T:T	G:G	C:T	A:G	A:A	A:A	G:G	G:A	G:A	T:T	T:T	C:C	T:T	G:A	C:C	A:A	T:T	G:G	T:T	T:C	T:T	C:C	G:G	T:T	A:A	A:A	G:G	T:C	A:C
589	HR_5_455	2019_1st	train set	case	case	G:G	T:T	C:C	G:G	G:G	A:A	G:G	G:G	T:C	T:C	T:T	G:G	A:A	A:A	C:C	T:T	G:G	C:T	A:G	A:A	A:A	A:G	G:A	G:G	C:C	T:A	C:C	T:T	G:G	C:C	A:A	T:T	G:G	A:A	T:C	A:T	C:C	G:G	T:T	G:G	A:G	G:A	T:C	C:C
590	HR_5_402	2019_1st	train set	case	case	G:G	T:T	C:C	G:G	G:G	A:A	G:G	G:T	T:T	T:C	T:T	G:G	A:A	A:A	C:C	T:T	G:G	C:T	A:G	A:A	A:A	A:A	G:A	G:G	C:C	T:T	C:C	T:T	G:G	C:C	A:A	T:C	G:G	T:A	T:C	A:A	C:T	G:G	T:T	G:A	A:G	G:G	T:C	A:A
591	HR_5_394	2019_1st	train set	case	case	G:G	T:T	T:T	G:G	G:G	A:A	G:G	G:G	T:C	T:C	T:T	G:G	A:A	A:A	C:C	T:T	G:G	C:T	A:G	A:A	A:A	A:A	G:A	G:G	T:T	T:T	C:C	T:T	G:G	C:A	A:A	T:C	G:G	A:A	T:C	A:A	C:T	G:G	T:T	G:G	A:G	G:G	T:C	A:A
592	HR_5_439	2019_1st	train set	case	case	G:G	T:T	C:C	G:G	G:G	A:A	G:G	G:G	T:C	T:C	T:T	G:G	A:A	A:A	C:C	T:T	G:G	C:T	A:G	A:A	A:A	A:A	G:A	G:G	C:C	T:T	C:C	T:T	G:G	C:A	A:G	T:C	G:G	A:A	T:C	A:T	C:T	G:G	T:T	G:G	A:G	G:G	T:C	A:A
593	HR_5_431	2019_1st	train set	case	case	G:G	T:T	C:C	G:G	G:G	A:A	G:G	G:G	T:C	T:C	T:T	G:G	A:G	A:A	C:C	T:T	G:G	C:T	A:G	A:A	A:A	A:A	G:A	G:A	C:C	T:T	C:C	T:T	G:G	C:C	A:A	T:C	G:G	A:A	T:C	A:A	C:T	G:G	T:T	G:A	A:A	G:G	T:C	C:C
594	HR_5_474	2019_1st	train set	case	case	G:G	T:T	C:C	G:G	G:G	A:A	G:G	G:G	T:T	T:C	T:T	G:G	A:A	A:A	T:T	T:T	G:G	C:T	A:G	A:A	A:A	A:G	G:A	G:G	T:T	T:T	C:C	T:T	G:G	C:C	A:A	T:C	G:G	T:T	T:C	A:T	C:T	G:G	T:T	A:A	A:A	G:A	T:C	A:C
595	HR_5_423	2019_1st	test set	case	case	G:G	T:T	C:C	G:G	G:G	A:A	G:G	G:G	T:C	T:C	T:C	G:G	A:G	A:A	C:C	T:T	G:G	C:T	A:G	A:A	A:A	A:A	G:A	G:A	C:C	T:T	C:C	T:T	G:G	C:A	A:A	T:C	G:G	T:T	T:C	A:A	C:T	G:G	T:T	G:A	A:A	G:G	T:C	A:C
596	HR_5_466	2019_1st	train set	case	case	G:G	T:T	C:T	G:G	G:G	A:A	G:G	G:G	T:C	T:C	T:T	G:G	A:A	A:A	C:C	T:T	G:G	C:T	A:G	A:A	A:A	A:A	G:A	G:G	C:T	T:T	C:C	T:T	G:G	C:A	A:A	T:C	G:G	A:A	T:C	A:T	C:T	G:G	T:T	G:G	A:G	G:G	T:C	A:A
597	HR_5_415	2019_1st	train set	case	case	G:G	T:T	C:C	G:G	G:G	A:A	G:G	G:T	T:C	T:C	T:C	G:G	A:A	A:A	C:C	T:T	G:G	C:T	A:G	A:A	A:A	A:A	G:A	G:G	C:T	T:T	C:C	T:T	G:G	C:C	A:A	T:C	G:G	T:A	T:C	A:A	C:T	G:G	T:T	G:A	A:A	G:G	T:C	A:C
598	HR_5_407	2019_1st	train set	case	case	G:G	T:T	C:C	G:G	G:G	A:A	G:G	G:G	T:C	T:C	T:C	G:G	A:A	A:A	C:C	T:T	G:G	C:T	A:G	A:A	A:A	A:A	G:A	G:A	C:C	T:T	C:C	T:T	G:G	C:A	A:A	T:C	G:G	A:A	T:C	A:A	C:T	G:G	T:T	G:A	A:A	G:G	T:C	C:C
599	HR_5_442	2019_1st	train set	case	case	G:G	T:T	T:T	G:G	G:G	A:A	G:G	G:G	T:C	T:C	T:T	G:G	A:A	A:A	C:C	T:T	G:G	C:T	A:G	A:A	A:A	A:G	G:A	G:G	T:T	T:A	C:C	T:T	G:A	C:A	A:A	T:T	G:G	T:T	T:C	T:T	C:C	G:G	T:T	G:G	A:A	G:G	T:C	A:C
600	HR_5_391	2019_1st	train set	case	case	G:G	T:T	C:C	G:G	G:G	A:A	G:G	G:T	T:C	T:C	T:C	G:G	A:A	A:A	C:C	T:T	G:G	C:T	G:G	A:A	A:A	A:A	G:A	G:G	C:T	T:T	C:C	T:T	G:G	C:C	A:A	T:C	G:G	A:A	T:C	A:A	C:T	G:G	T:T	G:G	A:G	G:G	T:C	A:C
601	HR_5_434	2019_1st	train set	case	case	G:G	T:T	C:C	G:G	G:G	A:A	G:G	G:T	T:C	T:C	T:C	G:G	A:A	A:A	C:T	T:T	G:G	C:T	A:G	A:A	A:A	A:A	G:A	G:G	C:T	T:T	C:C	T:T	G:G	C:A	A:A	T:C	G:G	T:T	T:C	A:A	C:T	G:G	T:T	G:A	A:A	G:G	T:C	A:C
602	HR_5_427	2019_1st	test set	case	case	G:G	T:T	C:C	G:G	G:G	A:A	G:G	G:T	T:T	T:C	T:T	G:G	A:A	A:A	C:C	T:T	G:G	C:T	A:G	A:A	A:A	A:A	G:A	G:G	C:T	T:T	C:C	T:T	G:G	C:C	A:A	T:C	G:G	A:A	T:C	A:A	C:T	G:G	T:T	G:A	A:G	G:G	T:C	A:C
603	HR_5_419	2019_1st	train set	case	case	G:G	T:T	C:C	G:G	G:G	A:A	G:G	G:G	T:T	T:C	T:C	G:G	A:A	A:A	C:C	T:T	G:G	C:T	A:G	A:A	A:A	A:A	G:A	G:A	C:C	T:T	C:C	T:T	G:G	C:A	A:A	T:C	G:G	A:A	T:C	A:A	C:T	G:G	T:T	G:A	A:G	G:G	T:C	A:C
604	HR_5_454	2019_1st	train set	case	case	G:G	T:T	C:T	G:G	G:G	A:A	G:G	G:G	T:C	T:C	T:T	G:G	A:A	A:A	C:C	T:T	G:G	C:T	A:G	A:A	A:A	A:A	G:A	G:G	C:T	T:A	C:C	T:T	G:G	C:C	A:A	T:C	G:G	A:A	T:C	T:T	C:T	G:G	T:T	G:A	A:A	G:G	T:C	A:A
605	HR_5_403	2019_1st	train set	case	case	G:G	T:T	C:C	G:G	G:G	A:A	G:G	G:G	T:C	T:C	T:T	G:G	A:A	A:A	C:T	T:T	G:G	C:T	A:G	A:A	A:A	A:A	G:A	G:G	T:T	T:T	C:C	T:T	G:G	C:A	A:A	T:C	G:G	A:A	T:C	A:A	C:T	G:G	T:T	A:A	A:A	G:A	T:C	A:A
606	HR_5_395	2019_1st	train set	case	case	G:G	T:T	C:T	G:G	G:G	A:A	G:G	G:G	T:C	T:C	T:T	G:G	A:A	A:A	C:C	T:T	G:G	C:T	A:G	A:A	A:A	G:G	G:A	G:G	C:T	T:T	C:C	T:T	G:G	C:C	A:A	T:C	G:G	A:A	T:C	T:T	C:T	G:G	T:T	G:G	A:A	G:G	T:C	A:C
607	HR_5_438	2019_1st	train set	case	case	G:G	T:T	C:C	G:G	G:G	A:A	G:G	G:T	T:C	T:C	T:T	G:G	A:G	A:A	C:T	T:T	G:G	C:T	G:G	A:A	A:A	A:A	G:A	G:G	C:T	T:T	C:C	T:T	G:G	C:A	A:A	T:C	G:G	T:A	T:C	A:A	C:T	G:G	T:T	G:A	A:A	G:G	T:C	A:C
608	HR_5_475	2019_1st	train set	case	case	G:G	T:T	C:T	G:G	G:G	A:A	G:G	G:G	T:C	T:C	T:T	G:G	A:A	A:A	C:C	T:T	G:G	C:T	A:G	A:A	A:A	A:A	G:A	G:G	C:T	T:T	C:C	T:T	G:G	C:A	A:G	T:C	G:G	A:A	T:C	A:T	C:T	G:G	T:T	G:G	A:G	G:A	T:C	A:A
609	HR_5_422	2019_1st	train set	case	case	G:G	T:T	C:C	G:G	G:G	A:A	G:G	G:G	T:C	T:C	T:T	G:G	A:A	A:A	C:C	T:T	G:G	C:T	A:G	A:A	A:A	A:G	G:A	G:G	C:C	T:T	C:C	T:T	G:G	C:C	A:G	T:T	G:G	A:A	T:C	T:T	C:C	G:G	T:T	G:G	A:A	G:A	T:C	C:C
610	HR_5_467	2019_1st	train set	case	case	G:G	T:T	C:C	G:G	G:G	A:A	G:G	G:T	T:C	T:C	T:T	G:G	A:A	A:A	C:T	T:T	G:G	C:T	A:G	A:A	A:A	A:A	G:A	G:G	C:T	T:T	C:C	T:T	G:G	C:C	A:A	T:C	G:G	T:A	T:C	A:A	C:T	G:G	T:T	G:A	A:A	G:G	T:C	A:C
611	HR_5_414	2019_1st	train set	case	case	G:G	T:T	C:C	G:G	G:G	A:A	G:G	G:G	T:T	T:C	T:T	G:G	A:A	A:A	C:T	T:T	G:G	C:T	A:G	A:A	A:A	A:G	G:A	G:G	C:T	T:T	C:C	T:T	G:A	C:A	A:A	T:T	G:G	T:T	T:C	A:A	C:C	G:T	T:T	G:G	A:A	G:G	T:C	C:C
612	HR_5_459	2019_1st	train set	case	case	G:G	T:T	C:C	G:G	G:G	A:A	G:G	G:T	No Call	T:C	T:T	G:G	A:A	A:A	C:C	T:T	G:G	C:T	A:G	A:A	A:A	A:A	G:A	G:G	C:T	T:T	C:C	T:T	G:G	C:C	A:A	T:C	G:G	T:T	T:C	A:A	C:T	G:G	T:T	G:A	A:A	G:G	T:C	A:C
613	HR_5_406	2019_1st	train set	case	case	G:G	T:T	C:C	G:G	G:G	A:A	G:G	G:G	T:C	T:C	T:T	G:G	A:A	A:A	C:T	T:T	G:G	C:T	A:G	A:A	A:A	A:A	G:A	G:G	C:T	T:T	C:C	T:T	G:A	C:C	A:A	T:C	G:G	T:T	T:C	A:A	C:T	G:G	T:T	G:G	A:A	G:A	T:C	A:C
614	HR_5_451	2019_1st	train set	case	case	G:G	T:T	C:C	G:G	G:G	A:A	G:G	G:G	T:C	T:C	T:T	G:G	A:A	A:A	C:C	T:T	G:G	C:T	A:G	A:A	A:A	A:A	G:A	G:G	C:C	T:A	C:C	T:T	G:G	C:C	A:A	T:C	G:G	T:A	T:C	T:T	C:T	G:G	T:T	G:G	A:A	G:A	T:C	C:C
615	HR_5_443	2019_1st	train set	case	case	G:G	T:T	C:C	G:G	G:G	A:A	G:G	G:G	T:C	T:C	T:T	G:G	A:A	A:A	C:C	T:T	G:G	C:T	A:G	A:A	A:A	A:G	G:A	G:G	C:T	T:T	C:C	T:T	G:G	C:C	A:A	T:T	G:G	T:A	T:C	A:T	C:C	G:G	T:T	G:G	A:A	G:G	T:C	A:A
616	HR_5_390	2019_1st	train set	case	case	G:G	T:T	C:C	G:G	G:G	A:A	G:G	G:G	T:C	T:C	T:T	G:G	A:A	A:A	C:T	T:T	G:G	C:T	A:G	A:A	A:A	A:G	G:A	G:G	T:T	T:T	C:C	T:T	G:G	C:C	A:A	T:C	G:G	A:A	T:C	A:T	C:T	G:T	T:T	A:A	A:A	G:A	T:C	A:C
617	HR_5_435	2019_1st	train set	case	case	G:G	T:T	T:T	G:G	G:G	A:A	G:G	G:G	T:C	T:C	T:T	G:G	A:A	A:A	C:C	T:T	G:G	C:T	A:G	A:A	A:A	A:G	G:A	G:G	T:T	T:A	C:C	T:T	G:G	C:C	A:A	T:T	G:A	T:A	T:C	A:T	C:C	G:G	T:T	G:G	A:A	G:G	T:C	C:C
618	HR_5_477	2019_1st	train set	case	case	G:G	T:T	C:C	G:G	G:G	A:A	G:G	G:G	T:T	T:C	T:T	G:G	A:A	A:A	C:T	T:T	G:G	C:T	A:G	A:A	A:A	A:A	G:A	G:G	C:T	T:T	C:C	T:T	G:A	C:C	A:A	T:C	G:G	A:A	T:C	A:A	C:T	G:T	T:T	G:G	A:A	G:G	T:C	A:C
619	HR_5_469	2019_1st	train set	case	case	G:G	T:T	C:C	G:G	G:G	A:A	G:G	G:G	T:C	T:C	T:T	G:G	A:G	A:A	C:C	T:T	G:G	C:T	G:G	A:A	A:A	A:A	G:A	G:A	C:T	T:T	C:C	T:T	G:G	C:A	A:A	T:C	G:G	T:T	T:C	A:A	C:T	G:G	T:T	G:G	A:G	G:G	T:C	A:C
620	HR_5_461	2019_1st	train set	case	case	G:G	T:T	C:C	G:G	G:G	A:A	G:G	G:T	T:C	T:C	T:T	G:G	A:G	A:A	C:C	T:T	G:G	C:T	A:G	A:A	A:A	A:A	G:A	G:G	C:T	T:T	C:C	T:T	G:G	C:C	A:A	T:C	G:G	A:A	T:C	A:A	C:T	G:G	T:T	G:A	A:A	G:G	T:C	C:C
621	HR_5_412	2019_1st	train set	case	case	G:G	T:T	C:C	G:G	G:G	A:A	G:G	G:G	T:C	T:C	T:T	G:G	A:A	A:A	T:T	T:T	G:G	C:T	A:G	A:A	A:A	A:G	G:A	G:G	T:T	T:T	C:C	T:T	G:A	C:A	A:A	T:T	G:G	T:T	T:C	A:A	C:C	G:G	T:T	G:G	A:A	G:A	T:C	A:C
622	HR_5_453	2019_1st	train set	case	case	G:G	T:T	C:C	G:G	G:G	A:A	G:G	G:G	T:C	T:C	T:C	G:G	A:A	A:A	C:T	T:T	G:G	C:T	A:G	A:A	A:A	A:A	G:A	G:A	C:C	T:T	C:C	T:T	G:G	C:A	A:A	T:C	G:G	T:A	T:C	A:A	C:T	G:G	T:T	G:A	A:G	G:G	T:C	A:C
623	HR_5_404	2019_1st	train set	case	case	G:G	T:T	T:T	G:G	G:G	A:A	G:G	G:G	T:C	T:C	T:T	G:G	A:A	A:A	C:C	T:T	G:G	C:T	A:G	A:A	A:A	A:G	G:A	G:G	T:T	T:T	C:C	T:T	G:G	C:A	A:A	T:T	G:G	T:T	T:C	A:T	C:C	G:G	T:T	G:G	A:A	G:G	T:C	A:A
624	HR_5_396	2019_1st	test set	case	case	G:G	T:T	C:T	G:G	G:G	A:A	G:G	G:G	T:C	T:C	T:T	G:G	A:A	A:G	C:C	T:T	G:G	C:T	A:G	A:A	A:A	A:G	G:A	G:G	C:C	T:T	C:C	T:T	G:G	C:A	A:A	T:T	G:G	A:A	T:C	A:T	C:C	G:G	T:T	G:G	A:A	G:A	T:C	A:C
625	HR_5_437	2019_1st	train set	case	case	G:G	T:T	C:T	G:G	G:G	A:A	G:G	G:G	T:C	T:C	T:T	G:G	A:A	A:G	C:C	T:T	G:G	C:T	A:G	A:A	A:A	A:G	G:A	G:G	C:C	T:A	C:C	T:T	G:G	C:A	A:G	T:C	G:G	A:A	T:C	A:T	C:T	G:G	T:T	G:G	A:A	G:G	T:C	C:C
626	HR_5_476	2019_1st	train set	case	case	G:G	T:T	T:T	G:G	G:G	A:A	G:G	G:G	T:C	T:C	T:T	G:G	A:A	A:A	C:T	T:T	G:G	C:T	A:G	A:A	A:A	A:G	G:A	G:G	T:T	T:A	C:C	T:T	G:A	C:C	A:A	T:T	G:G	T:T	T:C	T:T	C:C	G:G	T:T	A:A	A:A	G:G	T:C	A:C
627	HR_5_421	2019_1st	train set	case	case	G:G	T:T	C:C	G:G	G:G	A:A	G:G	G:G	T:T	T:C	T:T	G:G	A:A	A:A	C:T	T:T	G:G	C:T	A:G	A:A	A:A	A:A	G:A	G:G	T:T	T:T	C:C	T:T	G:A	C:A	A:A	T:C	G:G	A:A	T:C	A:T	C:T	G:T	T:T	A:A	A:A	G:A	T:C	C:C
628	HR_5_468	2019_1st	train set	case	case	G:G	T:T	C:C	G:G	G:G	A:A	G:G	G:G	T:C	T:C	T:T	G:G	A:A	A:A	T:T	T:T	G:G	C:T	A:G	A:A	A:A	A:G	G:A	G:G	C:T	T:T	C:C	T:T	G:G	C:C	A:A	T:T	G:G	A:A	T:C	A:T	C:C	G:G	T:T	G:G	A:A	G:A	T:C	A:C
629	HR_5_397	2019_1st	train set	case	case	G:G	T:T	C:C	G:G	G:G	A:A	G:G	G:G	T:C	T:C	T:T	G:G	A:A	A:A	T:T	T:T	G:G	C:T	A:G	A:A	A:A	A:A	G:A	G:G	C:T	T:T	C:C	T:T	G:G	C:C	A:A	T:T	G:G	T:T	T:C	A:A	C:C	G:G	T:T	G:G	A:A	G:A	T:C	A:A
630	HR_5_444	2019_1st	test set	case	case	G:G	T:T	C:T	G:G	G:G	A:A	G:G	G:G	T:C	T:C	T:T	G:G	A:A	A:A	C:C	T:T	G:G	C:T	A:G	A:A	A:A	A:A	G:A	G:G	C:T	T:A	C:C	T:T	G:G	C:A	A:A	T:C	G:G	T:A	T:C	A:T	C:T	G:G	T:T	G:G	A:G	G:A	T:C	A:C
631	HR_5_436	2019_1st	train set	case	case	G:G	T:T	T:T	G:G	G:G	A:A	G:G	G:G	T:C	T:C	T:T	G:G	A:A	A:A	C:C	T:T	G:G	C:T	A:G	A:A	A:A	G:G	G:A	G:A	T:T	T:A	C:C	T:T	G:A	C:C	A:A	T:T	G:G	T:T	T:C	A:T	C:C	G:G	T:T	A:A	A:A	G:G	T:C	A:A
632	HR_6_576	2019_1st	test set	case	case	G:T	T:T	C:C	G:G	G:G	A:A	G:G	G:T	T:C	T:C	T:T	G:G	A:A	A:A	C:C	T:T	G:G	C:C	A:G	A:A	A:A	A:A	G:A	G:G	C:C	T:T	C:C	T:T	G:G	C:A	A:A	T:C	G:G	T:A	T:C	A:A	C:T	G:G	T:T	G:A	A:A	G:G	T:C	A:C
633	HR_6_521	2019_1st	train set	case	case	G:T	T:T	C:C	G:G	G:G	A:A	G:G	G:G	T:C	T:C	T:T	G:G	A:G	A:A	C:C	T:T	G:G	C:C	G:G	A:A	A:A	A:A	G:A	G:A	C:T	T:T	C:C	T:T	G:G	C:C	A:A	T:C	G:G	T:T	T:C	A:A	C:T	G:G	T:T	G:A	A:A	G:G	T:C	C:C
634	HR_6_568	2019_1st	train set	case	case	G:T	T:T	C:C	G:G	G:G	A:A	G:G	G:T	T:T	T:C	T:C	G:G	A:A	A:A	C:C	T:T	G:G	C:C	G:G	A:A	A:A	A:A	G:A	G:G	C:T	T:T	C:C	T:T	G:G	C:A	A:A	T:C	G:G	T:T	T:C	A:A	C:T	G:G	T:T	G:G	A:G	G:G	T:C	A:C
635	HR_6_513	2019_1st	train set	case	case	G:T	T:T	C:C	G:G	G:G	A:A	G:G	G:G	T:C	T:C	T:T	G:G	A:A	A:A	C:C	T:T	G:G	C:C	A:G	A:A	A:A	A:G	G:A	G:G	T:T	T:T	C:C	T:T	G:A	C:C	A:A	T:T	G:G	T:T	T:C	A:T	C:C	G:G	T:T	A:A	A:A	G:G	T:C	A:C
636	HR_6_552	2019_1st	test set	case	case	G:T	T:T	C:C	G:G	G:G	A:A	G:G	G:G	T:C	T:C	T:T	G:G	A:A	A:A	C:C	T:T	G:G	C:C	A:G	A:A	A:A	A:G	G:A	G:G	C:T	T:T	C:C	T:T	G:G	C:C	A:A	T:T	G:G	A:A	T:C	A:A	C:C	G:G	T:T	A:A	A:A	G:A	T:C	A:C
637	HR_6_497	2019_1st	train set	case	case	G:T	T:T	C:C	G:G	G:G	A:A	G:G	G:G	T:C	T:C	T:T	G:G	A:A	A:A	C:C	T:T	G:G	C:C	A:G	A:A	A:A	A:A	G:A	G:G	C:T	T:T	C:C	T:T	G:A	C:A	A:A	T:C	G:G	T:T	T:C	A:T	C:T	G:G	T:T	G:G	A:A	G:A	T:C	A:C
638	HR_6_489	2019_1st	train set	case	case	G:T	T:T	C:C	G:G	G:G	A:A	G:G	G:T	T:C	T:C	T:C	G:G	A:G	A:A	C:C	T:T	G:G	C:C	A:G	A:A	A:A	A:A	G:A	G:G	C:C	T:T	C:C	T:T	G:G	C:A	A:A	T:C	G:G	T:A	T:C	A:A	C:T	G:G	T:T	G:A	A:A	G:G	T:C	A:C
639	HR_6_536	2019_1st	train set	case	case	G:G	T:T	C:C	G:G	G:G	A:A	G:G	G:T	T:C	T:C	T:C	G:G	A:A	A:A	C:C	T:T	G:G	C:C	G:G	A:A	A:A	A:A	G:A	G:G	C:T	T:T	C:C	T:T	G:G	C:C	A:A	T:C	G:G	T:A	T:C	A:A	C:T	G:G	T:T	G:A	A:A	G:G	T:C	C:C
640	HR_6_481	2019_1st	test set	case	case	G:G	T:T	C:C	G:G	G:G	A:A	G:G	G:G	T:C	T:C	T:T	G:G	A:A	A:A	C:C	T:T	G:G	C:C	A:G	A:A	A:A	A:A	G:A	G:G	C:T	T:T	C:C	T:T	G:A	C:C	A:A	T:C	G:G	A:A	T:C	A:A	C:T	G:T	T:T	G:G	A:A	G:A	T:C	C:C
641	HR_6_528	2019_1st	train set	case	case	G:T	T:T	C:C	G:G	G:G	A:A	G:G	G:T	T:C	T:C	T:T	G:G	A:G	A:A	C:C	T:T	G:G	C:C	G:G	A:A	A:A	A:A	G:A	G:G	C:T	T:T	C:C	T:T	G:G	C:A	A:A	T:C	G:G	T:A	T:C	A:A	C:T	G:G	T:T	G:G	A:A	G:G	T:C	A:C
642	HR_6_569	2019_1st	train set	case	case	G:G	T:T	C:C	G:G	G:G	A:A	G:G	G:T	T:T	T:C	T:T	G:G	A:G	A:A	C:C	T:T	G:G	C:C	A:G	A:A	A:A	A:A	G:A	G:G	C:C	T:T	C:C	T:T	G:G	C:C	A:A	T:C	G:G	A:A	T:C	A:A	C:T	G:G	T:T	G:A	A:G	G:G	T:C	C:C
643	HR_6_520	2019_1st	train set	case	case	G:T	T:T	C:T	G:G	G:G	A:A	G:G	G:G	T:C	T:C	T:T	G:G	A:A	A:A	C:C	T:T	G:G	C:C	A:G	A:A	A:A	A:A	G:A	G:G	C:T	T:A	C:C	T:T	G:G	C:C	A:G	T:C	G:G	A:A	T:C	T:T	C:T	G:G	T:T	G:G	A:A	G:A	T:C	A:C
644	HR_6_561	2019_1st	train set	case	case	G:T	T:T	C:C	G:G	G:G	A:A	G:G	G:T	T:C	T:C	T:C	G:G	A:A	A:A	C:C	T:T	G:G	C:C	A:G	A:A	A:A	A:A	G:A	G:G	C:C	T:T	C:C	T:T	G:G	C:C	A:A	T:C	G:G	T:T	T:C	A:A	C:T	G:G	T:T	G:A	A:A	G:G	T:C	A:A
645	HR_6_512	2019_1st	train set	case	case	G:T	T:T	C:C	G:G	G:G	A:A	G:G	G:T	T:C	T:C	T:T	G:G	A:G	A:A	C:C	T:T	G:G	C:T	G:G	A:A	A:A	A:A	G:A	G:G	C:T	T:T	C:C	T:T	G:G	C:A	A:A	T:C	G:G	T:T	T:C	A:A	C:T	G:G	T:T	G:A	A:A	G:G	T:C	A:C
646	HR_6_504	2019_1st	train set	case	case	G:T	T:T	C:C	G:G	G:G	A:A	G:G	G:G	T:C	T:C	T:T	G:G	A:A	A:A	C:C	T:T	G:G	C:C	A:G	A:A	A:A	A:A	G:A	G:G	C:C	T:A	C:C	T:T	G:G	C:A	A:G	T:T	G:G	A:A	T:C	A:T	C:C	G:G	T:T	G:G	A:A	G:A	T:C	A:A
647	HR_6_545	2019_1st	train set	case	case	G:G	T:T	C:C	G:G	G:G	A:A	G:G	G:G	T:C	T:C	T:T	G:G	A:G	A:A	C:C	T:T	G:G	C:C	A:G	A:A	A:A	A:A	G:A	G:A	C:C	T:T	C:C	T:T	G:G	C:C	A:A	T:C	G:G	T:T	T:C	A:A	C:T	G:G	T:T	G:A	A:A	G:G	T:C	C:C
648	HR_6_537	2019_1st	train set	case	case	G:G	T:T	C:C	G:G	G:G	A:A	G:G	G:T	T:T	T:C	T:T	G:G	A:A	A:A	C:C	T:T	G:G	C:C	A:G	A:A	A:A	A:A	G:A	G:G	C:T	T:T	C:C	T:T	G:G	C:C	A:A	T:C	G:G	T:T	T:C	A:A	C:T	G:G	T:T	G:A	A:G	G:G	T:C	C:C
649	HR_6_488	2019_1st	train set	case	case	G:T	T:T	C:C	G:G	G:G	A:A	G:G	G:G	T:T	T:C	T:T	G:G	A:A	A:A	C:C	T:T	G:G	C:C	G:G	A:A	A:A	A:A	G:A	G:A	C:T	T:T	C:C	T:T	G:G	C:A	A:A	T:C	G:G	T:A	T:C	A:A	C:T	G:G	T:T	G:A	A:G	G:G	T:C	A:A
650	HR_6_575	2019_1st	test set	case	case	G:T	T:T	C:C	G:G	G:G	A:A	G:G	G:T	T:T	T:C	T:T	G:G	A:G	A:A	C:C	T:T	G:G	C:C	A:G	A:A	A:A	A:A	G:A	G:G	C:C	T:T	C:C	T:T	G:G	C:A	A:A	T:C	G:G	T:T	T:C	A:A	C:T	G:G	T:T	G:A	A:G	G:G	T:C	A:C
651	HR_6_567	2019_1st	train set	case	case	G:G	T:T	C:C	G:G	G:G	A:A	G:G	G:G	T:C	T:C	T:T	G:G	A:A	A:A	T:T	T:T	G:G	C:C	A:G	A:A	A:A	A:A	G:A	G:G	C:T	T:T	C:C	T:T	G:A	C:C	A:A	T:C	G:G	A:A	T:C	A:T	C:T	G:T	T:T	A:A	A:A	G:A	T:C	C:C
652	HR_6_514	2019_1st	train set	case	case	G:T	T:T	C:C	G:G	G:G	A:A	G:G	G:G	T:T	T:C	T:T	G:G	A:A	A:A	C:C	T:T	G:G	C:C	A:G	A:A	A:A	A:A	G:A	G:A	C:T	T:T	C:C	T:T	G:G	C:C	A:A	T:C	G:G	T:A	T:C	A:A	C:T	G:G	T:T	G:G	A:G	G:G	T:C	A:A
653	HR_6_559	2019_1st	train set	case	case	G:G	T:T	C:C	G:G	G:G	A:A	G:G	G:G	T:T	T:C	T:T	G:G	A:A	A:A	C:C	T:T	G:G	C:C	A:G	A:A	A:A	A:A	G:A	G:G	C:T	T:T	C:C	T:T	G:A	C:A	A:A	T:C	G:G	A:A	T:C	A:A	C:T	G:T	T:T	G:G	A:A	G:G	T:C	C:C
654	HR_6_506	2019_1st	train set	case	case	G:T	T:T	C:C	G:G	G:G	A:A	G:G	G:G	T:C	T:C	T:T	G:G	A:A	A:A	T:T	T:T	G:G	C:C	A:G	A:A	A:A	A:A	G:A	G:G	C:T	T:T	C:C	T:T	G:A	C:A	A:A	T:C	G:G	A:A	T:C	A:A	C:T	G:G	T:T	G:G	A:A	G:A	T:C	A:C
655	HR_6_551	2019_1st	train set	case	case	G:T	T:T	C:C	G:G	G:G	A:A	G:G	G:G	T:C	T:C	T:T	G:G	A:G	A:A	C:C	T:T	G:G	C:T	G:G	A:A	A:A	A:A	G:A	G:A	C:T	T:T	C:C	T:T	G:G	C:C	A:A	T:C	G:G	A:A	T:C	A:A	C:T	G:G	T:T	G:G	A:G	G:G	T:C	A:C
656	HR_6_490	2019_1st	train set	case	case	G:T	T:T	C:C	G:G	G:G	A:A	G:G	G:G	T:C	T:C	T:T	G:G	A:A	A:A	C:C	T:T	G:G	C:C	A:G	A:A	A:A	A:G	G:A	G:G	C:C	T:A	C:C	T:T	G:G	C:A	A:G	T:T	G:G	A:A	T:C	A:T	C:C	G:G	T:T	G:G	A:G	G:A	T:C	C:C
657	HR_6_535	2019_1st	train set	case	case	G:T	T:T	C:C	G:G	G:G	A:A	G:G	G:G	T:T	T:C	T:T	G:G	A:A	A:A	C:C	T:T	G:G	C:C	A:G	A:A	A:A	A:A	G:A	G:G	C:T	T:A	C:C	T:T	G:G	A:A	A:G	T:C	G:G	A:A	T:C	A:T	C:T	G:G	T:G	G:G	A:A	G:G	T:C	A:A
658	HR_6_570	2019_1st	train set	case	case	G:T	T:T	C:C	G:G	G:G	A:A	G:G	G:G	T:C	T:C	T:T	G:G	A:A	A:A	C:C	T:T	G:G	C:C	A:G	A:A	A:A	A:G	G:A	G:G	C:C	T:T	C:C	T:T	G:G	C:C	A:A	T:C	G:G	A:A	T:C	T:T	C:T	G:G	T:T	G:G	A:A	G:G	T:C	C:C
659	HR_6_519	2019_1st	train set	case	case	G:T	T:T	C:C	G:G	G:G	A:A	G:G	G:G	T:T	T:C	T:T	G:G	A:A	A:A	T:T	T:T	G:G	C:C	A:G	A:A	A:A	A:A	G:A	G:G	C:T	T:T	C:C	T:T	G:G	C:C	A:A	T:T	G:G	T:T	T:C	A:T	C:C	G:T	T:T	A:A	A:A	G:A	T:C	A:C
660	HR_6_562	2019_1st	train set	case	case	G:T	T:T	C:C	G:G	G:G	A:A	G:G	G:T	T:C	T:C	T:T	G:G	A:G	A:A	C:C	T:T	G:G	C:C	A:G	A:A	A:A	A:A	G:A	G:G	C:C	T:T	C:C	T:T	G:G	C:C	A:A	T:C	G:G	T:A	T:C	A:A	C:T	G:G	T:T	G:A	A:A	G:G	T:C	A:A
661	HR_6_511	2019_1st	train set	case	case	G:T	T:T	C:C	G:G	G:G	A:A	G:G	G:T	T:C	T:C	T:C	G:G	A:A	A:A	C:C	T:T	G:G	C:C	A:G	A:A	A:A	A:A	G:A	G:G	C:T	T:T	C:C	T:T	G:G	C:A	A:A	T:C	G:G	A:A	T:C	A:A	C:T	G:G	T:T	G:A	A:A	G:G	T:C	A:C
662	HR_6_554	2019_1st	train set	case	case	G:T	T:T	C:C	G:G	G:G	A:A	G:G	G:G	T:C	T:C	T:T	G:G	A:A	A:A	C:C	T:T	G:G	C:C	A:G	A:A	A:A	A:G	G:A	G:G	C:T	T:T	C:C	T:T	G:G	C:A	A:A	T:T	G:G	T:T	T:C	A:A	C:C	G:G	T:T	G:G	A:A	G:G	T:C	A:C
663	HR_6_503	2019_1st	train set	case	case	G:T	T:T	C:C	G:G	G:G	A:A	G:G	G:G	T:C	T:C	T:C	G:G	A:A	A:A	C:C	T:T	G:G	C:C	A:G	A:A	A:A	A:A	G:A	G:A	C:C	T:T	C:C	T:T	G:G	C:C	A:A	T:C	G:G	A:A	T:C	A:A	C:T	G:G	T:T	G:A	A:A	G:G	T:C	A:C
664	HR_6_546	2019_1st	train set	case	case	G:T	T:T	T:T	G:G	G:G	A:A	G:G	G:G	T:C	T:C	T:T	G:G	A:A	A:A	C:C	T:T	G:G	C:C	A:G	A:A	A:A	A:G	G:A	G:G	T:T	T:T	C:C	T:T	G:G	C:A	A:A	T:T	G:G	T:T	T:C	A:A	C:C	G:G	T:T	A:A	A:G	G:G	T:C	A:A
665	HR_6_495	2019_1st	train set	case	case	G:T	T:T	C:T	G:G	G:G	A:A	G:G	G:G	T:C	T:C	T:T	G:G	A:A	A:A	C:C	T:T	G:G	C:C	A:G	A:A	A:A	A:A	G:A	G:G	C:T	T:T	C:C	T:T	G:G	C:C	A:A	T:C	G:G	T:A	T:C	T:T	C:T	G:G	T:T	G:G	A:G	G:G	T:C	A:A
666	HR_6_530	2019_1st	train set	case	case	G:T	T:T	C:T	G:G	G:G	A:A	G:G	G:G	T:C	T:C	T:T	G:G	A:A	G:G	C:C	T:T	G:G	C:C	A:G	A:A	A:A	A:G	G:A	G:G	C:T	T:A	C:C	T:T	G:G	C:C	A:G	T:T	G:G	A:A	T:C	T:T	C:C	G:G	T:T	G:G	A:G	G:G	T:C	C:C
667	HR_6_523	2019_1st	train set	case	case	G:G	T:T	C:C	G:G	G:G	A:A	G:G	G:G	T:C	T:C	T:T	G:G	A:A	A:A	C:C	T:T	G:G	C:C	A:G	A:A	A:A	A:A	G:A	G:G	C:T	T:T	C:C	T:T	G:A	C:C	A:A	T:T	G:G	A:A	T:C	A:T	C:C	G:T	T:T	A:A	A:A	G:G	T:C	C:C
668	HR_6_515	2019_1st	train set	case	case	G:T	T:T	C:T	G:G	G:G	A:A	G:G	G:G	T:C	T:C	T:T	G:G	A:A	A:A	C:C	T:T	G:G	C:C	A:G	A:A	A:A	A:G	G:A	G:G	C:T	T:T	C:C	T:T	G:G	C:C	A:G	T:C	G:G	T:A	T:C	A:T	C:T	G:G	T:T	G:G	A:G	G:A	T:C	A:C
669	HR_6_507	2019_1st	train set	case	case	G:T	T:T	C:C	G:G	G:G	A:A	G:G	G:G	T:C	T:C	T:T	G:G	A:A	A:A	C:C	T:T	G:G	C:C	G:G	A:A	A:A	A:A	G:A	G:A	C:T	T:T	C:C	T:T	G:G	C:C	A:A	T:C	G:G	T:T	T:C	A:A	C:T	G:G	T:T	G:A	A:A	G:G	T:C	A:C
670	HR_6_550	2019_1st	train set	case	case	G:T	T:T	C:C	G:G	G:G	A:A	G:G	G:T	T:T	T:C	T:T	G:G	A:G	A:A	C:C	T:T	G:G	C:C	A:G	A:A	A:A	A:A	G:A	G:G	C:C	T:T	C:C	T:T	G:G	C:A	A:A	T:C	G:G	T:A	T:C	A:A	C:T	G:G	T:T	G:A	A:G	G:G	T:C	A:C
671	HR_6_542	2019_1st	train set	case	case	G:T	T:T	T:T	G:G	G:G	A:A	G:G	G:G	T:C	T:C	T:T	G:G	A:A	A:A	C:C	T:T	G:G	C:C	A:G	A:A	A:A	A:G	G:A	G:G	T:T	T:T	C:C	T:T	G:G	C:C	A:A	T:T	G:G	T:T	T:C	T:T	C:C	G:G	T:T	A:A	A:A	G:G	T:C	A:C
672	HR_6_491	2019_1st	train set	case	case	G:T	T:T	C:C	G:G	G:G	A:A	G:G	G:G	T:T	T:C	T:T	G:G	A:A	A:A	C:C	T:T	G:G	C:C	A:G	A:A	A:A	A:G	G:A	G:G	C:T	T:T	C:C	T:T	G:G	C:A	A:A	T:T	G:G	T:T	T:C	A:T	C:T	G:T	T:G	A:A	A:A	G:G	T:C	A:C
673	HR_6_534	2019_1st	train set	case	case	No Call	T:T	C:C	G:G	G:G	A:A	G:G	G:G	T:C	T:C	T:T	G:G	A:A	A:A	T:T	T:T	G:G	C:C	A:G	A:A	A:A	A:G	G:A	G:G	C:T	T:T	C:C	T:T	G:G	C:A	A:A	T:C	G:G	A:A	T:C	A:T	C:T	G:T	T:T	G:G	A:A	G:A	T:C	C:C
674	HR_6_483	2019_1st	train set	case	case	G:T	T:T	C:T	G:G	G:G	A:A	G:G	G:G	T:C	T:C	T:T	G:G	A:A	A:A	C:C	T:T	G:G	C:C	A:G	A:A	A:A	A:G	G:A	G:G	C:T	T:A	C:C	T:T	G:G	C:A	A:G	T:T	G:G	T:A	T:C	A:T	C:C	G:G	T:T	G:G	A:G	G:G	T:C	C:C
675	HR_6_571	2019_1st	test set	case	case	G:T	T:T	C:C	G:G	G:G	A:A	G:G	G:G	T:C	T:C	T:T	G:G	A:A	A:A	C:C	T:T	G:G	C:C	A:G	A:A	A:A	A:A	G:A	G:G	C:C	T:A	C:C	T:T	G:G	C:C	A:G	T:T	G:G	A:A	T:C	A:T	C:C	G:G	T:T	G:G	A:A	G:A	T:C	A:C
676	HR_6_518	2019_1st	train set	case	case	No Call	T:T	C:C	G:G	G:G	A:A	G:G	G:G	T:C	T:C	T:T	G:G	A:A	A:A	C:C	T:T	G:G	C:C	A:G	A:A	A:A	A:G	G:A	G:G	C:T	T:T	C:C	T:T	G:G	C:A	A:A	T:T	G:G	A:A	T:C	A:A	C:C	G:T	T:T	A:A	A:A	G:G	T:C	C:C
677	HR_6_563	2019_1st	train set	case	case	G:G	T:T	C:C	G:G	G:G	A:A	G:G	G:G	T:T	T:C	T:T	G:G	A:A	A:A	C:C	T:T	G:G	C:C	A:G	A:A	A:A	A:A	G:A	G:A	C:T	T:T	C:C	T:T	G:G	C:A	A:A	T:C	G:G	T:A	T:C	A:A	C:T	G:G	T:T	G:A	A:G	G:G	T:C	C:C
678	HR_6_510	2019_1st	train set	case	case	G:G	T:T	C:C	G:G	G:G	A:A	G:G	G:G	T:C	T:C	T:T	G:G	A:A	A:A	C:C	T:T	G:G	C:T	G:G	A:A	A:A	A:G	G:A	G:G	T:T	T:T	C:C	T:T	G:G	C:A	A:A	T:T	G:G	T:T	T:C	A:T	C:C	G:T	T:T	G:G	A:A	G:A	T:C	C:C
679	HR_6_502	2019_1st	train set	case	case	G:T	T:T	C:C	G:G	G:G	A:A	G:G	G:T	T:C	T:C	T:C	G:G	A:G	A:A	C:C	T:T	G:G	C:T	G:G	A:A	A:A	A:A	G:A	G:G	C:T	T:T	C:C	T:T	G:G	C:C	A:A	T:C	G:G	T:T	T:C	A:A	C:T	G:G	T:T	G:G	A:A	G:G	T:C	A:C
680	HR_6_547	2019_1st	train set	case	case	G:T	T:T	C:C	G:G	G:G	A:A	G:G	G:T	T:C	T:C	T:T	G:G	A:G	A:A	C:C	T:T	G:G	C:C	A:G	A:A	A:A	A:A	G:A	G:G	C:T	T:T	C:C	T:T	G:G	C:A	A:A	T:C	G:G	T:T	T:C	A:A	C:T	G:G	T:T	G:A	A:A	G:G	T:C	A:C
681	HR_6_494	2019_1st	train set	case	case	G:T	T:T	C:C	G:G	G:G	A:A	G:G	G:G	T:C	T:C	T:T	G:G	A:A	A:A	C:C	T:T	G:G	C:C	A:G	A:A	A:A	A:A	G:A	G:G	C:T	T:T	C:C	T:T	G:G	C:C	A:A	T:C	G:G	T:T	T:C	A:A	C:T	G:T	T:T	A:A	A:A	G:G	T:C	A:C
682	HR_6_539	2019_1st	train set	case	case	G:T	T:T	T:T	G:G	G:G	A:A	G:G	G:T	T:T	T:C	T:T	G:G	A:A	A:G	C:C	T:T	G:G	C:C	A:G	A:A	A:A	A:A	G:A	G:G	C:T	T:A	C:C	T:T	G:G	C:C	A:A	T:T	G:G	T:T	T:C	A:T	C:C	G:G	T:T	G:A	A:G	G:A	T:C	A:C
683	HR_6_486	2019_1st	train set	case	case	G:T	T:T	C:C	G:G	G:G	A:A	G:G	G:G	T:C	T:C	T:T	G:G	A:A	G:G	C:C	T:T	G:G	C:C	A:G	A:A	A:A	A:A	G:A	G:G	C:C	T:T	C:C	T:T	G:G	C:C	A:G	T:C	G:G	A:A	T:C	T:T	C:T	G:G	T:T	G:G	A:A	G:A	T:C	A:C
684	HR_6_531	2019_1st	train set	case	case	G:T	T:T	C:C	G:G	G:G	A:A	G:G	G:G	T:T	T:C	T:T	G:G	A:A	A:A	T:T	T:T	G:G	C:C	A:G	A:A	A:A	A:A	G:A	G:G	C:T	T:T	C:C	T:T	G:A	C:C	A:A	T:T	G:G	T:T	T:C	A:T	C:C	G:G	T:T	G:G	A:A	G:A	T:C	A:C
685	HR_6_573	2019_1st	train set	case	case	G:T	T:T	C:C	G:G	G:G	A:A	G:G	G:G	T:C	T:C	T:T	G:G	A:A	A:A	T:T	T:T	G:G	C:C	A:G	A:A	A:A	A:A	G:A	G:G	C:T	T:T	C:C	T:T	G:G	C:A	A:A	T:C	G:G	T:T	T:C	A:T	C:T	G:G	T:T	A:A	A:A	G:A	T:C	A:C
686	HR_6_565	2019_1st	train set	case	case	G:G	T:T	C:C	G:G	G:G	A:A	G:G	G:G	T:T	T:C	T:T	G:G	A:A	A:A	C:C	T:T	G:G	C:C	A:G	A:A	A:A	A:G	G:A	G:G	T:T	T:T	C:C	T:T	G:G	C:A	A:A	T:T	G:G	T:A	T:C	A:A	C:C	G:T	T:T	A:A	A:A	G:G	T:C	C:C
687	HR_6_516	2019_1st	train set	case	case	G:T	T:T	C:C	G:G	G:G	A:A	G:G	G:G	T:C	T:C	T:T	G:G	A:A	A:A	C:C	T:T	G:G	C:T	G:G	A:A	A:A	A:G	G:A	G:G	T:T	T:T	C:C	T:T	G:G	C:A	A:A	T:T	G:G	A:A	T:C	A:T	C:C	G:G	T:T	G:G	A:A	G:G	T:C	A:C
688	HR_6_557	2019_1st	train set	case	case	G:T	T:T	C:T	G:G	G:G	A:A	G:G	G:G	T:C	T:C	T:T	G:G	A:A	A:A	C:C	T:T	G:G	C:C	A:G	A:A	A:A	A:A	G:A	G:G	C:T	T:T	C:C	T:T	G:G	C:C	A:A	T:C	G:G	A:A	T:C	T:T	C:T	G:G	T:T	G:G	A:A	G:G	T:C	C:C
689	HR_6_549	2019_1st	train set	case	case	G:T	T:T	C:C	G:G	G:G	A:A	G:G	G:G	T:C	T:C	T:T	G:G	A:A	A:A	C:C	T:T	G:G	C:T	G:G	A:A	A:A	A:A	G:A	G:A	C:T	T:T	C:C	T:T	G:G	C:C	A:A	T:C	G:G	A:A	T:C	A:A	C:T	G:G	T:T	G:A	A:A	G:G	T:C	A:C
690	HR_6_500	2019_1st	train set	case	case	G:G	T:T	C:C	G:G	G:G	A:A	G:G	G:G	T:T	T:C	T:T	G:G	A:A	A:A	C:C	T:T	G:G	C:C	G:G	A:A	A:A	A:A	G:A	G:G	T:T	T:T	C:C	T:T	G:A	C:A	A:A	T:T	G:G	T:A	T:C	A:T	C:C	G:T	T:T	A:A	A:A	G:G	T:C	C:C
691	HR_6_541	2019_1st	test set	case	case	G:T	T:T	C:C	G:G	G:G	A:A	G:G	G:G	T:T	T:C	T:T	G:G	A:A	A:A	T:T	T:T	G:G	C:C	A:G	A:A	A:A	A:G	G:A	G:G	T:T	T:T	C:C	T:T	G:G	C:A	A:A	T:T	G:G	T:T	T:C	A:A	C:C	G:G	T:T	A:A	A:A	G:A	T:C	A:C
692	HR_6_492	2019_1st	train set	case	case	G:T	T:T	C:C	G:G	G:G	A:A	G:G	G:G	T:C	T:C	T:T	G:G	A:A	A:A	C:C	T:T	G:G	C:C	A:G	A:A	A:A	A:A	G:A	G:G	C:C	T:T	C:C	T:T	G:G	C:A	A:A	T:C	G:G	T:A	T:C	A:T	C:T	G:G	T:T	G:G	A:G	G:A	T:C	A:C
693	HR_6_533	2019_1st	train set	case	case	G:G	T:T	C:C	G:G	G:G	A:A	G:G	G:G	T:C	T:C	T:T	G:G	A:A	A:A	C:C	T:T	G:G	C:T	G:G	A:A	A:A	A:G	G:A	G:G	T:T	T:T	C:C	T:T	G:G	C:C	A:A	T:T	G:G	A:A	T:C	A:T	C:C	G:T	T:T	A:A	A:A	G:A	T:C	C:C
694	HR_6_484	2019_1st	train set	case	case	G:T	T:T	C:C	G:G	G:G	A:A	G:G	G:G	T:C	T:C	T:T	G:G	A:A	A:A	C:C	T:T	G:G	C:C	A:G	A:A	A:A	A:A	G:A	G:G	T:T	T:T	C:C	T:T	G:G	C:A	A:A	T:C	G:G	T:T	T:C	A:A	C:T	G:G	T:T	G:G	A:A	G:G	T:C	A:C
695	HR_6_525	2019_1st	train set	case	case	G:T	T:T	C:C	G:G	G:G	A:A	G:G	G:G	T:C	T:C	T:T	G:G	A:A	A:A	C:C	T:T	G:G	C:C	A:G	A:A	A:A	A:A	G:A	G:G	C:T	T:T	C:C	T:T	G:G	C:A	A:A	T:T	G:G	A:A	T:C	A:A	C:C	G:G	T:T	G:G	A:A	G:G	T:C	A:C
696	HR_6_572	2019_1st	train set	case	case	G:T	T:T	C:T	G:G	G:G	A:A	G:G	G:G	T:C	T:C	T:T	G:G	A:A	A:A	C:C	T:T	G:G	C:C	A:G	A:A	A:A	A:G	G:A	G:G	C:T	T:T	C:C	T:T	G:G	C:A	A:A	T:C	G:G	A:A	T:C	A:T	C:T	G:G	T:T	G:G	A:A	G:A	T:C	A:A
697	HR_6_564	2019_1st	train set	case	case	G:T	T:T	C:C	G:G	G:G	A:A	G:G	G:T	T:C	T:C	T:C	G:G	A:G	A:A	C:C	T:T	G:G	C:C	A:G	A:A	A:A	A:A	G:A	G:G	C:C	T:T	C:C	T:T	G:G	C:C	A:A	T:C	G:G	T:A	T:C	A:A	C:T	G:G	T:T	G:A	A:A	G:G	T:C	A:C
698	HR_6_509	2019_1st	test set	case	case	G:T	T:T	C:C	G:G	G:G	A:A	G:G	G:G	T:C	T:C	T:C	G:G	A:G	A:A	C:C	T:T	G:G	C:C	A:G	A:A	A:A	A:A	G:A	G:A	C:C	T:T	C:C	T:T	G:G	C:A	A:A	T:C	G:G	T:T	T:C	A:A	C:T	G:G	T:T	G:A	A:G	G:G	T:C	A:A
699	HR_6_501	2019_1st	train set	case	case	G:G	T:T	C:C	G:G	G:G	A:A	G:G	G:G	T:C	T:C	T:T	G:G	A:A	A:A	C:C	T:T	G:G	C:C	A:G	A:A	A:A	A:A	G:A	G:A	C:C	T:T	C:C	T:T	G:G	C:C	A:A	T:C	G:G	A:A	T:C	A:A	C:T	G:G	T:T	G:A	A:A	G:G	T:C	C:C
700	HR_6_548	2019_1st	test set	case	case	G:T	T:T	C:C	G:G	G:G	A:A	G:G	G:G	T:C	T:C	T:T	G:G	A:A	A:A	C:C	T:T	G:G	C:C	A:G	A:A	A:A	A:A	G:A	G:G	C:T	T:T	C:C	T:T	G:G	C:A	A:A	T:C	G:G	A:A	T:C	A:A	C:T	G:G	T:T	A:A	A:A	G:G	T:C	A:C
701	HR_6_493	2019_1st	train set	case	case	G:T	T:T	C:C	G:G	G:G	A:A	G:G	G:G	T:C	T:C	T:T	G:G	A:A	G:G	C:C	T:T	G:G	C:C	A:G	A:A	A:A	A:A	G:A	G:G	C:C	T:T	C:C	T:T	G:G	C:C	A:G	T:C	G:G	T:A	T:C	T:T	C:T	G:G	T:T	No Call	A:A	G:G	T:C	A:C
702	HR_6_540	2019_1st	train set	case	case	G:G	T:T	C:C	G:G	G:G	A:A	G:G	G:G	T:C	T:C	T:C	G:G	A:A	A:A	C:C	T:T	G:G	C:T	G:G	A:A	A:A	A:A	G:A	G:A	C:T	T:T	C:C	T:T	G:G	C:C	A:A	T:C	G:G	T:T	T:C	A:A	C:T	G:G	T:T	G:A	A:G	G:G	T:C	C:C
703	HR_6_532	2019_1st	train set	case	case	G:G	T:T	C:C	G:G	G:G	A:A	G:G	G:T	T:T	T:C	T:T	G:G	A:A	A:A	C:C	T:T	G:G	C:C	A:G	A:A	A:A	A:A	G:A	G:G	C:T	T:T	C:C	T:T	G:G	C:C	A:A	T:C	G:G	T:A	T:C	A:A	C:T	G:G	T:T	G:A	A:G	G:G	T:C	C:C
704	HR_7_672	2019_1st	train set	case	case	G:G	T:T	C:T	G:G	G:G	A:A	G:G	G:G	T:C	T:T	No Call	G:G	A:A	A:A	C:C	T:T	G:G	No Call	G:G	A:A	A:A	A:A	G:A	G:G	T:T	T:T	C:C	T:T	G:G	C:C	A:A	T:T	G:G	T:T	T:C	T:T	C:C	G:G	T:T	G:G	A:A	G:G	T:T	A:A
705	HR_7_617	2019_1st	test set	case	case	G:G	T:T	C:C	G:G	G:G	A:A	G:G	G:G	T:C	T:T	T:C	G:G	A:G	A:A	C:C	T:T	G:G	C:C	A:A	A:A	A:A	A:A	G:A	G:A	C:C	T:T	C:C	T:T	G:G	C:A	A:A	T:C	G:G	T:T	T:C	A:A	C:T	G:G	T:T	G:A	A:A	G:G	T:C	C:C
706	HR_7_664	2019_1st	train set	case	case	G:G	T:T	C:C	G:G	G:G	A:A	G:G	G:G	T:C	T:T	T:T	G:G	A:A	A:A	C:T	T:T	G:G	C:C	A:A	A:A	A:A	A:G	G:A	G:G	T:T	A:A	C:C	T:T	G:G	C:C	A:A	T:T	G:A	T:T	T:C	A:T	C:C	G:G	T:T	G:G	A:G	G:A	T:C	A:C
707	HR_7_609	2019_1st	train set	case	case	G:G	T:T	C:C	G:G	G:G	A:A	G:G	G:T	T:C	T:T	T:T	G:G	A:A	A:A	C:C	T:T	G:G	C:C	A:A	A:A	A:A	A:A	G:A	G:G	C:C	T:T	C:C	T:T	G:G	C:A	A:A	T:C	G:G	A:A	T:C	A:A	C:T	G:G	T:T	G:G	A:A	G:G	T:C	C:C
708	HR_7_656	2019_1st	train set	case	case	G:G	T:T	T:T	G:G	G:G	A:A	G:G	G:G	T:C	T:T	T:T	G:G	A:A	A:A	C:C	T:T	G:G	C:C	A:A	A:A	A:A	A:A	G:A	G:G	T:T	T:A	C:C	T:T	G:A	C:C	A:A	T:T	G:G	T:T	T:C	T:T	C:C	G:G	T:T	A:A	A:A	G:G	T:C	A:A
709	HR_7_601	2019_1st	train set	case	case	G:G	T:T	C:C	G:G	G:G	A:A	G:G	G:G	T:C	T:T	T:T	G:G	A:A	A:A	C:C	T:T	G:G	C:C	A:A	A:A	A:A	A:A	G:A	G:G	C:T	T:T	C:C	T:T	G:G	C:A	A:A	T:C	G:G	A:A	T:C	A:T	C:T	G:G	T:T	G:G	A:G	G:G	T:C	A:C
710	HR_7_648	2019_1st	train set	case	case	G:G	T:T	T:T	G:G	G:G	A:A	G:G	G:G	T:C	T:T	T:T	G:G	A:A	A:A	C:C	T:T	G:G	C:C	A:A	A:A	A:A	A:G	G:A	G:G	T:T	T:T	C:C	T:T	G:G	C:A	A:A	T:T	G:G	T:A	T:C	A:T	C:C	G:G	T:T	A:A	A:A	G:G	T:C	A:C
711	HR_7_593	2019_1st	train set	case	case	G:G	T:T	C:C	G:G	G:G	A:A	G:G	G:G	T:T	T:T	T:T	G:G	A:A	A:A	C:C	T:T	G:G	C:C	A:A	A:A	A:A	A:G	G:A	G:G	T:T	T:T	C:C	T:T	G:G	C:A	A:A	T:T	G:G	T:T	T:C	A:A	C:C	G:T	T:T	A:A	A:A	G:A	T:C	A:C
712	HR_7_585	2019_1st	train set	case	case	G:G	T:T	C:C	G:G	G:G	A:A	G:G	G:T	T:T	T:T	T:C	G:G	A:G	A:A	C:C	T:T	G:G	C:C	A:A	A:A	A:A	A:A	G:A	G:G	C:T	T:T	C:C	T:T	G:G	C:A	A:A	T:C	G:G	T:A	T:C	A:A	C:T	G:G	T:T	G:A	A:G	G:G	T:C	C:C
713	HR_7_577	2019_1st	train set	case	case	G:G	T:T	C:C	G:G	G:G	A:A	G:G	G:T	T:C	T:T	T:T	G:G	A:G	A:A	C:C	T:T	G:G	C:C	A:A	A:A	A:A	A:A	G:A	G:G	C:T	T:T	C:C	T:T	G:G	C:A	A:A	T:C	G:G	T:T	T:C	A:A	C:T	G:G	T:T	G:A	A:A	G:G	T:C	A:C
714	HR_7_665	2019_1st	train set	case	case	G:G	T:T	C:C	G:G	G:G	A:A	G:G	G:G	T:C	T:T	T:C	G:G	A:A	A:A	C:C	T:T	G:G	C:C	A:A	A:A	A:A	A:A	G:A	G:A	C:C	T:T	C:C	T:T	G:G	C:C	A:A	T:C	G:G	T:T	T:C	A:A	C:T	G:G	T:T	G:A	A:A	G:G	T:C	A:A
715	HR_7_657	2019_1st	train set	case	case	G:G	T:T	T:T	G:G	G:G	A:A	G:G	G:G	T:C	T:T	T:T	G:G	A:A	A:A	C:C	T:T	G:G	C:C	A:A	A:A	A:A	A:G	G:A	G:A	T:T	T:T	C:C	T:T	G:G	C:A	A:A	T:T	G:G	T:T	T:C	A:T	C:C	G:G	T:T	A:A	A:A	G:G	T:C	A:C
716	HR_7_608	2019_1st	train set	case	case	G:G	T:T	C:C	G:G	G:G	A:A	G:G	G:G	T:C	T:T	C:C	G:G	A:G	A:A	C:C	T:T	G:G	C:C	A:G	A:A	A:A	A:A	G:A	G:A	C:T	T:T	C:C	T:T	G:G	C:C	A:A	T:C	G:G	A:A	T:C	A:A	C:T	G:G	T:T	G:A	A:A	G:G	T:C	A:C
717	HR_7_649	2019_1st	train set	case	case	G:G	T:T	C:T	G:G	G:G	A:A	G:G	G:G	T:C	T:T	T:T	G:G	A:A	G:G	C:C	T:T	G:G	C:C	A:A	A:A	A:A	A:A	G:A	G:G	C:C	T:T	C:C	T:T	G:G	C:C	A:A	T:C	G:G	A:A	T:C	T:T	C:T	G:G	T:T	G:G	A:A	G:G	T:C	C:C
718	HR_7_592	2019_1st	train set	case	case	G:G	T:T	C:C	G:G	G:G	A:A	G:G	G:G	T:C	T:T	T:T	G:G	A:G	A:A	C:C	T:T	G:G	C:C	A:A	A:A	A:A	A:A	G:A	G:A	C:T	T:T	C:C	T:T	G:G	C:C	A:A	T:C	G:G	A:A	T:C	A:A	C:T	G:G	T:T	G:G	A:A	G:G	T:C	A:A
719	HR_7_633	2019_1st	test set	case	case	G:G	T:T	C:C	G:G	G:G	A:A	G:G	G:G	T:C	T:T	T:T	G:G	A:A	A:A	T:T	T:T	G:G	C:C	A:A	A:A	A:A	A:A	G:A	G:G	C:T	T:T	C:C	T:T	G:G	C:C	A:A	T:C	G:G	T:T	T:C	A:A	C:T	G:T	T:T	G:G	A:A	G:A	T:C	C:C
720	HR_7_625	2019_1st	train set	case	case	G:G	T:T	C:C	G:G	G:G	A:A	G:G	G:G	T:C	T:T	T:T	G:G	A:A	A:A	C:C	T:T	G:G	C:C	A:A	A:A	A:A	A:A	G:A	G:G	C:T	T:T	C:C	T:T	G:G	C:C	A:A	T:T	G:G	A:A	T:C	A:T	C:C	G:T	T:T	G:G	A:A	G:G	T:C	C:C
721	HR_7_671	2019_1st	train set	case	case	G:G	T:T	C:C	G:G	G:G	A:A	G:G	G:T	T:C	T:T	T:T	G:G	A:A	A:A	C:C	T:T	G:G	C:C	A:G	A:A	A:A	A:A	G:A	G:G	C:T	T:T	C:C	T:T	G:G	C:C	A:A	T:C	G:G	T:A	T:C	A:A	C:T	G:G	T:T	G:A	A:A	G:G	T:C	C:C
722	HR_7_618	2019_1st	train set	case	case	G:G	T:T	C:C	G:G	G:G	A:A	G:G	G:T	T:C	T:T	T:T	G:G	A:A	A:A	C:C	T:T	G:G	C:C	A:A	A:A	A:A	A:A	G:A	G:G	C:T	T:T	C:C	T:T	G:G	C:C	A:A	T:C	G:G	A:A	T:C	A:A	C:T	G:G	T:T	G:A	A:A	G:G	T:C	A:C
723	HR_7_663	2019_1st	test set	case	case	G:G	T:T	C:C	G:G	G:G	A:A	G:G	G:T	T:C	T:T	T:T	G:G	A:G	A:A	C:C	T:T	G:G	C:C	A:A	A:A	A:A	A:A	G:A	G:G	C:C	T:T	C:C	T:T	G:G	C:C	A:A	T:C	G:G	A:A	T:C	A:A	C:T	G:G	T:T	G:A	A:A	G:G	T:C	A:A
724	HR_7_655	2019_1st	train set	case	case	G:G	T:T	T:T	G:G	G:G	A:A	G:G	G:G	T:C	T:T	T:T	G:G	A:A	A:A	C:C	T:T	G:G	C:C	A:A	A:A	A:A	A:G	G:A	G:G	C:T	T:T	C:C	T:T	G:G	C:A	A:A	T:T	G:G	T:A	T:C	A:T	C:C	G:G	T:T	A:A	A:A	G:G	T:C	A:A
725	HR_7_602	2019_1st	train set	case	case	G:G	T:T	C:C	G:G	G:G	A:A	G:G	G:T	T:C	T:T	T:T	G:G	A:A	A:A	C:C	T:T	G:G	C:T	A:G	A:A	A:A	A:A	G:A	G:G	C:T	T:T	C:C	T:T	G:G	C:C	A:A	T:C	G:G	A:A	T:C	A:A	C:C	G:G	G:G	A:A	A:G	G:A	T:C	C:C
726	HR_7_647	2019_1st	train set	case	case	G:G	T:T	C:C	G:G	G:G	A:A	G:G	G:G	T:C	T:T	T:T	G:G	A:A	A:A	C:C	T:T	G:G	C:C	A:A	A:A	A:A	A:G	G:A	G:G	C:T	T:T	C:C	T:T	G:G	C:A	A:A	T:C	G:G	A:A	T:C	A:T	C:T	G:G	T:T	G:G	A:G	G:G	T:C	A:C
727	HR_7_639	2019_1st	train set	case	case	No Call	T:T	C:C	G:G	G:G	A:A	G:G	G:T	T:C	T:T	T:T	G:G	A:G	A:A	C:C	T:T	G:G	C:C	A:A	A:A	A:A	A:A	G:A	G:G	C:C	T:T	C:C	T:T	G:G	C:C	A:A	T:C	G:G	A:A	T:C	A:A	C:T	G:G	T:T	G:A	A:A	G:G	T:C	C:C
728	HR_7_631	2019_1st	train set	case	case	G:G	T:T	C:C	G:G	G:G	A:A	G:G	G:G	T:T	T:T	T:T	G:G	A:A	A:A	T:T	T:T	G:G	C:C	A:A	A:A	A:A	A:G	G:A	G:G	T:T	T:T	C:C	T:T	G:G	C:A	A:A	T:C	G:G	T:T	T:C	A:A	C:T	G:T	T:T	G:G	A:A	G:A	T:C	C:C
729	HR_7_578	2019_1st	train set	case	case	G:G	T:T	C:C	G:G	G:G	A:A	G:G	G:G	T:T	T:T	T:T	G:G	A:A	A:A	C:C	T:T	G:G	C:C	A:A	A:A	A:A	A:G	G:A	G:G	C:T	T:T	C:C	T:T	G:G	C:C	A:A	T:T	G:G	A:A	T:C	A:T	C:C	G:G	T:T	G:G	A:A	G:G	T:C	A:C
730	HR_7_623	2019_1st	train set	case	case	G:G	T:T	C:C	G:G	G:G	A:A	G:G	G:G	T:T	T:T	T:T	G:G	A:G	A:A	C:C	T:T	G:G	C:C	A:A	A:A	A:A	A:A	G:A	G:A	C:T	T:T	C:C	T:T	G:G	C:C	A:A	T:C	G:G	T:A	T:C	A:A	C:T	G:G	T:T	G:G	A:G	G:G	T:C	A:C
731	HR_7_666	2019_1st	train set	case	case	G:G	T:T	C:C	G:G	G:G	A:A	G:G	G:G	T:C	T:T	T:T	G:G	A:G	A:A	C:C	T:T	G:G	C:C	A:A	A:A	A:A	A:A	G:A	G:A	C:C	T:T	C:C	T:T	G:G	C:A	A:A	T:C	G:G	A:A	T:C	A:A	C:T	G:G	T:T	G:A	A:A	G:G	T:C	A:C
732	HR_7_615	2019_1st	train set	case	case	G:G	T:T	C:C	G:G	G:G	A:A	G:G	G:T	T:C	T:T	T:T	G:G	A:G	A:A	C:C	T:T	G:G	C:C	A:A	A:A	A:A	A:A	G:A	G:G	C:C	T:T	C:C	T:T	G:G	C:C	A:A	T:C	G:G	A:A	T:C	A:T	C:C	G:G	T:G	G:G	A:G	G:A	T:C	C:C
733	HR_7_658	2019_1st	train set	case	case	G:G	T:T	C:C	G:G	G:G	A:A	G:G	G:G	T:T	T:T	T:T	G:G	A:A	A:A	C:C	T:T	G:G	C:C	A:A	A:A	A:A	A:A	G:A	G:G	C:T	T:T	C:C	T:T	G:G	C:A	A:A	T:C	G:G	A:A	T:C	A:T	C:T	G:T	T:T	G:G	A:A	G:G	T:C	C:C
734	HR_7_607	2019_1st	train set	case	case	G:G	T:T	C:C	G:G	G:G	A:A	G:G	G:G	T:C	T:T	T:T	G:G	A:A	A:A	C:C	T:T	G:G	C:C	A:A	A:A	A:A	A:G	G:A	G:G	T:T	T:T	C:C	T:T	G:G	C:C	A:A	T:C	G:G	A:A	T:C	A:A	C:T	G:T	T:T	G:G	A:A	G:G	T:C	A:C
735	HR_7_650	2019_1st	train set	case	case	G:G	T:T	C:C	G:G	G:G	A:A	G:G	G:G	T:T	T:T	T:T	G:G	A:A	A:A	T:T	T:T	G:G	C:C	A:A	A:A	A:A	A:G	G:A	G:G	C:T	T:T	C:C	T:T	G:A	C:A	A:A	T:T	G:G	T:T	T:C	A:A	C:C	G:T	T:T	G:G	A:A	G:A	T:C	C:C
736	HR_7_642	2019_1st	train set	case	case	G:G	T:T	T:T	G:G	G:G	A:A	G:G	G:G	T:C	T:T	T:T	G:G	A:A	A:A	C:C	T:T	G:G	C:C	A:A	A:A	A:A	A:G	G:A	G:G	T:T	T:T	C:C	T:T	G:A	C:C	A:A	T:T	G:G	T:T	T:C	T:T	C:C	G:G	T:T	A:A	A:A	G:G	T:C	A:C
737	HR_7_634	2019_1st	train set	case	case	G:G	T:T	C:C	G:G	G:G	A:A	G:G	G:G	T:C	T:T	T:T	G:G	A:G	A:A	C:C	T:T	G:G	C:C	A:A	A:A	A:A	A:A	G:A	G:A	C:C	T:T	C:C	T:T	G:G	C:C	A:A	T:C	G:G	T:A	T:C	A:A	C:T	G:G	T:T	G:A	A:A	G:G	T:C	C:C
738	HR_7_583	2019_1st	train set	case	case	G:G	T:T	C:C	G:G	G:G	A:A	G:G	G:G	T:C	T:T	T:T	G:G	A:A	A:A	C:C	T:T	G:G	C:C	A:A	A:A	A:A	A:G	G:A	G:G	T:T	T:T	C:C	T:T	G:A	C:C	A:A	T:C	G:G	A:A	T:C	A:A	C:T	G:T	T:T	A:A	A:A	G:G	T:C	C:C
739	HR_7_626	2019_1st	train set	case	case	G:G	T:T	C:C	G:G	G:G	A:A	G:G	G:G	T:C	T:T	T:T	G:G	A:A	A:A	C:C	T:T	G:G	C:T	A:G	A:A	A:A	A:A	G:A	G:A	C:T	T:T	C:C	T:T	G:G	C:A	A:A	T:C	G:G	A:A	T:C	A:A	C:T	G:G	T:T	G:A	A:A	G:G	T:C	A:C
740	HR_7_670	2019_1st	train set	case	case	G:G	T:T	C:C	G:G	G:G	A:A	G:G	G:G	T:C	T:T	T:C	G:G	A:A	A:A	C:C	T:T	G:G	C:C	A:A	A:A	A:A	A:A	G:A	G:A	C:C	T:T	C:C	T:T	G:G	C:A	A:A	T:C	G:G	T:A	T:C	A:A	C:T	G:G	T:T	G:A	A:A	G:G	T:C	C:C
741	HR_7_619	2019_1st	train set	case	case	G:G	T:T	C:C	G:G	G:G	A:A	G:G	G:G	T:C	T:T	T:T	G:G	A:A	A:A	C:C	T:T	G:G	C:C	A:A	A:A	A:A	A:G	G:A	G:G	C:T	T:T	C:C	T:T	G:G	C:C	A:A	T:T	G:G	T:T	T:C	A:T	C:C	G:T	T:T	A:A	A:A	G:G	T:C	C:C
742	HR_7_662	2019_1st	train set	case	case	G:G	T:T	C:C	G:G	G:G	A:A	G:G	G:G	T:C	T:T	T:T	G:G	A:A	A:A	C:C	T:T	G:G	C:C	A:A	A:A	A:A	A:G	G:A	G:G	C:T	T:T	C:C	T:T	G:A	C:A	A:A	T:C	G:G	A:A	T:C	A:A	C:T	G:G	T:T	G:G	A:A	G:G	T:C	A:C
743	HR_7_611	2019_1st	train set	case	case	G:G	T:T	C:T	G:G	G:G	A:A	G:G	G:G	T:C	T:T	T:T	G:G	A:A	A:A	C:C	T:T	G:G	C:C	A:A	A:A	A:A	A:G	G:A	G:G	C:T	T:T	C:C	T:T	G:G	C:C	A:A	T:C	G:G	T:T	T:C	A:T	C:T	G:G	T:T	A:A	A:G	G:G	T:C	A:C
744	HR_7_646	2019_1st	train set	case	case	G:G	T:T	T:T	G:G	G:G	A:A	G:G	G:G	T:C	T:T	T:T	G:G	A:A	A:A	C:C	T:T	G:G	C:C	A:A	A:A	A:A	A:G	G:A	G:G	T:T	T:T	C:C	T:T	G:G	C:C	A:A	T:T	G:G	T:T	T:C	T:T	C:C	G:G	T:T	G:G	A:A	G:G	T:C	A:A
745	HR_7_595	2019_1st	train set	case	case	G:G	T:T	T:T	G:G	G:G	A:A	G:G	G:G	T:C	T:T	T:T	G:G	A:A	A:A	C:C	T:T	G:G	C:C	A:A	A:A	A:A	A:A	G:A	G:G	C:T	T:T	C:C	T:T	G:G	C:C	A:G	T:T	G:G	T:T	T:C	A:T	C:T	G:G	T:G	A:A	A:A	G:G	T:C	A:A
746	HR_7_638	2019_1st	train set	case	case	No Call	T:T	C:C	G:G	G:G	A:A	G:G	G:G	T:C	T:T	T:T	G:G	A:A	A:A	T:T	T:T	G:G	C:C	A:A	A:A	A:A	A:G	G:A	G:G	C:T	T:T	C:C	T:T	G:A	C:C	A:A	T:C	G:G	A:A	T:C	A:T	C:T	G:T	T:T	G:G	A:A	G:A	T:C	C:C
747	HR_7_587	2019_1st	train set	case	case	G:G	T:T	C:C	G:G	G:G	A:A	G:G	G:G	T:C	T:T	T:T	G:G	A:A	A:A	C:C	T:T	G:G	C:T	A:G	A:A	A:A	A:G	G:A	G:G	T:T	T:T	C:C	T:T	G:G	C:C	A:A	T:T	G:G	A:A	T:C	A:A	C:C	G:G	T:T	G:G	A:A	G:G	T:C	A:C
748	HR_7_630	2019_1st	train set	case	case	G:G	T:T	C:C	G:G	G:G	A:A	G:G	G:G	T:C	T:T	T:C	G:G	A:A	A:A	C:C	T:T	G:G	C:C	A:A	A:A	A:A	A:A	G:A	G:A	C:C	T:T	C:C	T:T	G:G	C:C	A:A	T:C	G:G	T:A	T:C	A:A	C:T	G:G	T:T	G:A	A:A	G:G	T:C	C:C
749	HR_7_579	2019_1st	train set	case	case	No Call	T:T	C:C	G:G	G:G	A:A	G:G	G:G	T:C	T:T	T:T	G:G	A:A	A:A	C:C	T:T	G:G	C:C	A:A	A:A	A:A	A:A	G:A	G:G	C:T	T:T	C:C	T:T	G:G	C:A	A:A	T:C	G:G	A:A	T:C	A:A	C:T	G:T	T:T	A:A	A:A	G:G	T:C	C:C
750	HR_7_622	2019_1st	train set	case	case	G:G	T:T	C:C	G:G	G:G	A:A	G:G	G:G	T:C	T:T	T:T	G:G	A:A	A:A	C:C	T:T	G:G	C:C	A:A	A:A	A:A	A:A	G:A	G:G	T:T	T:T	C:C	T:T	G:A	C:C	A:A	T:T	G:G	T:T	T:C	T:T	C:C	G:G	T:T	A:A	A:A	G:G	T:C	A:A
751	HR_7_667	2019_1st	train set	case	case	G:G	T:T	C:C	G:G	G:G	A:A	G:G	G:T	T:C	T:T	T:C	G:G	A:G	A:A	C:C	T:T	G:G	C:C	A:A	A:A	A:A	A:A	G:A	G:G	C:C	T:T	C:C	T:T	G:G	C:C	A:A	T:C	G:G	T:T	T:C	A:A	C:T	G:G	T:T	G:A	A:A	G:G	T:C	C:C
752	HR_7_614	2019_1st	train set	case	case	G:G	T:T	C:C	G:G	G:G	A:A	G:G	G:G	T:C	T:T	T:T	G:G	A:G	A:A	C:C	T:T	G:G	C:C	A:A	A:A	A:A	A:A	G:A	G:A	C:T	T:T	C:C	T:T	G:G	C:A	A:A	T:C	G:G	T:T	T:C	A:A	C:T	G:G	T:T	G:A	A:A	G:G	T:C	A:C
753	HR_7_651	2019_1st	test set	case	case	G:G	T:T	C:C	G:G	G:G	A:A	G:G	G:G	T:T	T:T	T:T	G:G	A:A	A:A	C:C	T:T	G:G	C:C	A:A	A:A	A:A	A:A	G:A	G:G	C:T	T:T	C:C	T:T	G:G	C:C	A:A	T:T	G:G	A:A	T:C	A:A	C:C	G:G	T:T	G:G	A:A	G:G	T:C	A:C
754	HR_7_590	2019_1st	train set	case	case	G:G	T:T	T:T	G:G	G:G	A:A	G:G	G:G	T:C	T:T	T:T	G:G	A:A	A:A	C:C	T:T	G:G	C:C	A:A	A:A	A:A	A:G	G:A	G:G	T:T	T:A	C:C	T:T	G:A	C:C	A:A	T:T	G:G	T:T	T:C	A:T	C:C	G:G	T:T	A:A	A:A	G:G	T:C	A:C
755	HR_7_635	2019_1st	train set	case	case	No Call	T:T	C:C	G:G	G:G	A:A	G:G	G:G	T:T	T:T	T:T	G:G	A:A	A:A	C:C	T:T	G:G	C:C	A:A	A:A	A:A	A:A	G:A	G:G	T:T	T:T	C:C	T:T	G:A	C:A	A:A	T:C	G:G	A:A	T:C	A:T	C:T	G:T	T:T	A:A	A:A	G:A	T:C	C:C
756	HR_7_582	2019_1st	train set	case	case	G:G	T:T	C:C	G:G	G:G	A:A	G:G	G:G	T:C	T:T	T:T	G:G	A:A	A:A	C:C	T:T	G:G	C:C	A:A	A:A	A:A	A:A	G:A	G:G	T:T	T:T	C:C	T:T	G:G	C:C	A:A	T:C	G:G	T:A	T:C	A:A	C:T	G:T	T:T	G:G	A:A	G:G	T:C	C:C
757	HR_7_627	2019_1st	train set	case	case	G:G	T:T	C:C	G:G	G:G	A:A	G:G	G:T	T:C	T:T	T:C	G:G	A:G	A:A	C:C	T:T	G:G	C:C	A:A	A:A	A:A	A:A	G:A	G:G	C:C	T:T	C:C	T:T	G:G	C:A	A:A	T:C	G:G	T:T	T:C	A:A	C:T	G:G	T:T	G:A	A:A	G:G	T:C	A:C
758	HR_7_669	2019_1st	train set	case	case	G:G	T:T	C:C	G:G	G:G	A:A	G:G	G:G	T:T	T:T	T:T	G:G	A:A	A:A	C:C	T:T	G:G	C:C	A:A	A:A	A:A	A:A	G:A	G:G	C:T	T:T	C:C	T:T	G:G	C:A	A:A	T:T	G:G	A:A	T:C	A:A	C:C	G:G	T:T	A:A	A:A	G:G	T:C	A:A
759	HR_7_620	2019_1st	train set	case	case	G:G	T:T	C:C	G:G	G:G	A:A	G:G	G:G	T:C	T:T	T:T	G:G	A:A	A:A	C:C	T:T	G:G	C:T	A:G	A:A	A:A	A:A	G:A	G:A	C:T	T:T	C:C	T:T	G:G	C:C	A:A	T:C	G:G	A:A	T:C	A:A	C:T	G:G	T:T	G:G	A:A	G:G	T:C	A:C
760	HR_7_661	2019_1st	train set	case	case	G:G	T:T	C:C	G:G	G:G	A:A	G:G	G:G	T:C	T:T	T:T	G:G	A:A	A:A	C:C	T:T	G:G	C:C	A:A	A:A	A:A	A:A	G:A	G:G	C:T	T:T	C:C	T:T	G:G	C:A	A:A	T:C	G:G	A:A	T:C	A:T	C:T	G:T	T:T	G:G	A:A	G:G	T:C	C:C
761	HR_7_612	2019_1st	train set	case	case	G:G	T:T	C:C	G:G	G:G	A:A	G:G	G:G	T:C	T:T	T:T	G:G	A:A	A:A	C:C	T:T	G:G	C:C	A:A	A:A	A:A	A:A	G:A	G:A	C:C	T:T	C:C	T:T	G:G	C:C	A:A	T:C	G:G	T:A	T:C	A:A	C:T	G:G	T:T	G:A	A:A	G:G	T:C	C:C
762	HR_7_653	2019_1st	train set	case	case	G:G	T:T	C:C	G:G	G:G	A:A	G:G	G:G	T:C	T:T	T:C	G:G	A:G	A:A	C:C	T:T	G:G	C:C	A:A	A:A	A:A	A:A	G:A	G:A	C:C	T:T	C:C	T:T	G:G	C:A	A:A	T:C	G:G	T:T	T:C	A:A	C:T	G:G	T:T	G:G	A:A	G:G	T:C	A:C
763	HR_7_604	2019_1st	train set	case	case	G:G	T:T	C:C	G:G	G:G	A:A	G:G	G:G	T:C	T:T	T:T	G:G	A:A	G:G	C:C	T:T	G:G	C:C	A:A	A:A	A:A	A:A	G:A	G:G	C:C	T:A	C:C	T:T	G:G	C:C	A:A	T:T	G:G	A:A	T:C	T:T	C:C	G:G	T:T	G:G	A:G	G:G	T:C	A:A
764	HR_7_645	2019_1st	train set	case	case	G:G	T:T	C:C	G:G	G:G	A:A	G:G	G:G	T:C	T:T	T:T	G:G	A:A	A:A	C:C	T:T	G:G	T:T	A:G	A:A	A:A	A:A	G:A	G:A	C:T	T:T	C:C	T:T	G:G	C:A	A:A	T:C	G:G	T:T	T:C	A:A	C:T	G:G	T:T	G:A	A:A	G:G	T:C	A:A
765	HR_7_637	2019_1st	train set	case	case	No Call	T:T	C:C	G:G	G:G	A:A	G:G	G:G	T:C	T:T	T:T	G:G	A:A	A:A	C:C	T:T	G:G	C:C	A:A	A:A	A:A	A:G	G:A	G:G	C:T	T:T	C:C	T:T	G:G	C:C	A:A	T:C	G:G	T:T	T:C	A:T	C:T	G:T	T:T	G:G	A:A	G:G	T:C	C:C
766	HR_7_588	2019_1st	train set	case	case	G:G	T:T	T:T	G:G	G:G	A:A	G:G	G:G	T:C	T:T	T:T	G:G	A:A	A:A	C:C	T:T	G:G	C:C	A:A	A:A	A:A	A:A	G:A	G:G	T:T	T:T	C:C	T:T	G:G	C:C	A:A	T:T	G:G	T:T	T:C	A:T	C:C	G:G	T:T	G:G	A:A	G:G	T:C	A:C
767	HR_7_629	2019_1st	train set	case	case	G:G	T:T	C:T	G:G	G:G	A:A	G:G	G:G	T:C	T:T	T:T	G:G	A:A	A:A	C:C	T:T	G:G	C:C	A:A	A:A	A:A	A:A	G:A	G:G	C:T	T:T	C:C	T:T	G:G	C:C	A:A	T:C	G:G	A:A	T:C	T:T	C:T	G:G	T:T	G:G	A:A	G:A	T:C	C:C
768	HR_7_580	2019_1st	train set	case	case	G:G	T:T	C:C	G:G	G:G	A:A	G:G	G:G	T:C	T:T	T:T	G:G	A:G	A:A	C:C	T:T	G:G	C:C	A:A	A:A	A:A	A:A	G:A	G:A	C:C	T:T	C:C	T:T	G:G	C:A	A:A	T:C	G:G	T:A	T:C	A:A	C:T	G:G	T:T	G:G	A:A	G:G	T:C	A:C
769	HR_7_621	2019_1st	train set	case	case	G:G	T:T	C:C	G:G	G:G	A:A	G:G	G:G	T:T	T:T	T:C	G:G	A:G	A:A	C:C	T:T	G:G	C:C	A:A	A:A	A:A	A:A	G:A	G:A	C:C	T:T	C:C	T:T	G:G	C:A	A:A	T:C	G:G	T:A	T:C	A:A	C:T	G:G	T:T	G:A	A:G	G:G	T:C	A:C
770	HR_7_668	2019_1st	train set	case	case	G:G	T:T	C:C	G:G	G:G	A:A	G:G	G:G	T:C	T:T	T:T	G:G	A:G	A:A	C:C	T:T	G:G	C:C	A:A	A:A	A:A	A:A	G:A	G:A	C:C	T:T	C:C	T:T	G:G	C:A	A:A	T:C	G:G	A:A	T:C	A:A	C:T	G:G	T:T	G:G	A:A	G:G	T:C	A:C
771	HR_7_613	2019_1st	train set	case	case	G:G	T:T	C:C	G:G	G:G	A:A	G:G	G:T	T:C	T:T	T:C	G:G	A:A	A:A	C:C	T:T	G:G	C:C	A:A	A:A	A:A	A:A	G:A	G:G	C:C	T:T	C:C	T:T	G:G	C:A	A:A	T:C	G:G	T:T	T:C	A:A	C:T	G:G	T:T	G:A	A:A	G:G	T:C	A:C
772	HR_7_660	2019_1st	train set	case	case	G:G	T:T	C:C	G:G	G:G	A:A	G:G	G:T	T:T	T:T	T:T	G:G	A:A	A:A	C:C	T:T	G:G	C:C	A:A	A:A	A:A	A:A	G:A	G:G	C:T	T:T	C:C	T:T	G:G	C:C	A:A	T:C	G:G	T:T	T:C	A:A	C:T	G:G	T:T	G:A	A:G	G:G	T:C	A:C
773	HR_7_652	2019_1st	train set	case	case	G:G	T:T	C:C	G:G	G:G	A:A	G:G	G:T	T:C	T:T	T:T	G:G	A:A	A:A	C:C	T:T	G:G	C:C	A:A	A:A	A:A	A:A	G:A	G:G	C:C	T:T	C:C	T:T	G:G	C:A	A:A	T:C	G:G	T:T	T:C	A:A	C:T	G:G	T:T	G:A	A:A	G:G	T:C	A:C
774	HR_7_597	2019_1st	train set	case	case	G:G	T:T	C:C	G:G	G:G	A:A	G:G	G:G	T:C	T:T	T:T	G:G	A:A	A:G	C:C	T:T	G:G	C:C	A:A	A:A	A:A	A:G	G:A	G:G	C:C	T:A	C:C	T:T	G:G	C:A	A:A	T:T	G:G	A:A	T:C	A:T	C:C	G:G	T:T	G:G	A:A	G:A	T:C	C:C
775	HR_7_644	2019_1st	train set	case	case	G:G	T:T	C:T	G:G	G:G	A:A	G:G	G:G	T:C	T:T	T:T	G:G	A:A	A:A	C:C	T:T	G:G	C:C	A:A	A:A	A:A	A:G	G:A	G:G	C:C	T:T	C:C	T:T	G:G	C:A	A:A	T:T	G:G	A:A	T:C	A:T	C:C	G:G	T:T	G:G	A:A	G:G	T:C	A:C
776	HR_7_589	2019_1st	test set	case	case	G:G	T:T	T:T	G:G	G:G	A:A	G:G	G:G	T:C	T:T	T:T	G:G	A:A	A:A	C:C	T:T	G:G	C:C	A:A	A:A	A:A	A:G	G:A	G:G	T:T	T:T	C:C	T:T	G:G	C:A	A:A	T:C	G:G	T:T	T:C	A:A	C:T	G:G	T:T	G:G	A:G	G:G	T:C	A:C
777	HR_7_636	2019_1st	train set	case	case	G:G	T:T	C:C	G:G	G:G	A:A	G:G	G:G	T:C	T:T	T:T	G:G	A:A	A:A	C:C	T:T	G:G	C:C	A:G	A:A	A:A	A:A	G:A	G:G	T:T	T:T	C:C	T:T	G:G	C:C	A:A	T:C	G:G	T:A	T:C	A:T	C:T	G:T	T:T	G:G	A:A	G:A	T:C	A:C
778	HR_7_581	2019_1st	train set	case	case	G:G	T:T	C:T	G:G	G:G	A:A	G:G	G:G	T:C	T:T	T:T	G:G	A:A	A:A	C:C	T:T	G:G	C:C	A:A	A:A	A:A	A:A	G:A	G:G	C:T	T:A	C:C	T:T	G:G	C:C	A:A	T:C	G:G	A:A	T:C	A:T	C:T	G:G	T:T	G:G	A:G	G:G	T:C	A:A
779	HR_7_628	2019_1st	train set	case	case	G:G	T:T	C:C	G:G	G:G	A:A	G:G	G:G	T:C	T:T	T:T	G:G	A:A	A:A	C:C	T:T	G:G	C:C	A:A	A:A	A:A	A:G	G:A	G:G	C:C	T:A	C:C	T:T	G:G	C:C	A:G	T:T	G:G	A:A	T:C	T:T	C:C	G:G	T:T	G:G	A:G	G:G	T:C	A:A
780	HR_8_768	2019_1st	test set	case	case	G:G	T:T	C:C	G:G	G:G	A:A	G:G	G:G	T:T	T:C	T:T	G:G	A:A	A:A	No Call	T:T	G:G	C:T	A:G	A:A	A:A	A:A	G:A	G:G	C:T	T:T	C:C	T:T	G:G	C:A	A:A	T:C	G:G	T:T	T:C	A:A	T:T	G:G	T:T	G:G	A:A	G:A	T:C	A:C
781	HR_8_760	2019_1st	train set	case	case	G:G	T:T	C:C	G:G	G:G	A:A	G:G	G:G	T:C	T:C	T:C	G:G	A:A	A:A	C:C	T:T	G:G	C:T	A:G	A:A	A:A	A:G	G:A	G:G	C:C	T:T	C:C	T:T	G:G	C:C	A:G	T:T	G:G	A:A	T:C	T:T	C:C	G:G	T:T	G:G	A:A	G:G	T:C	A:C
782	HR_8_697	2019_1st	train set	case	case	No Call	T:T	C:C	G:G	G:G	A:A	G:G	G:G	T:T	T:C	T:T	G:G	A:A	A:A	No Call	T:T	G:G	C:T	A:G	A:A	A:A	A:G	G:A	G:G	C:T	T:T	C:C	T:T	G:G	C:A	A:A	T:T	G:G	A:A	T:C	A:A	C:C	G:T	T:T	G:G	A:A	G:A	T:C	C:C
783	HR_8_744	2019_1st	train set	case	case	G:G	T:T	C:T	G:G	G:G	A:A	G:G	G:G	T:C	T:C	T:T	G:G	A:A	A:A	C:C	T:T	G:G	C:T	A:G	A:A	A:A	A:G	G:A	G:G	C:T	T:T	C:C	T:T	G:G	C:C	A:A	T:T	G:G	A:A	T:C	T:T	C:C	G:G	T:T	G:G	A:A	A:A	T:C	A:C
784	HR_8_689	2019_1st	train set	case	case	G:G	T:T	C:C	G:G	G:G	A:A	G:G	G:G	T:C	T:C	No Call	G:G	A:A	A:A	C:C	T:T	G:G	C:T	A:G	A:A	A:A	A:G	G:A	G:G	C:T	T:T	C:C	T:T	G:G	C:C	A:A	T:C	G:G	T:T	T:C	A:A	T:T	G:G	T:T	G:G	A:A	G:G	T:C	A:C
785	HR_8_736	2019_1st	test set	case	case	G:G	T:T	C:C	G:G	G:G	A:A	G:G	G:G	T:C	T:C	T:C	G:G	A:A	A:A	C:C	T:T	G:G	C:T	A:G	A:A	A:A	A:A	G:A	G:G	C:T	T:T	C:C	T:T	G:G	C:C	A:A	T:T	G:G	A:A	T:C	A:T	C:C	G:G	T:T	G:G	A:A	G:G	T:C	A:C
786	HR_8_681	2019_1st	test set	case	case	G:G	T:T	C:C	G:G	G:G	A:A	G:G	G:T	T:C	T:C	C:C	G:G	A:A	A:A	C:C	T:T	G:G	C:T	A:G	A:A	A:A	A:A	G:A	G:G	C:T	T:T	C:C	T:T	G:G	C:A	A:A	T:C	G:G	T:T	T:C	A:A	T:T	G:G	T:T	A:A	A:A	G:G	T:C	A:C
787	HR_8_728	2019_1st	train set	case	case	G:G	T:T	C:C	G:G	G:G	A:A	G:G	G:G	T:C	T:C	T:C	G:G	A:A	A:G	C:C	T:T	G:G	C:T	A:G	A:A	A:A	A:A	G:A	G:G	C:T	T:T	C:C	T:T	G:G	C:A	A:G	T:C	G:G	A:A	T:C	A:T	T:T	G:G	T:T	G:G	A:A	G:G	T:C	A:A
788	HR_8_673	2019_1st	train set	case	case	G:G	T:T	C:C	G:G	G:G	A:A	G:G	G:G	T:C	T:C	No Call	G:G	A:A	A:A	C:C	T:T	G:G	C:T	A:G	A:A	A:A	A:A	G:A	G:G	T:T	T:T	C:C	T:T	G:G	C:C	A:A	T:C	G:G	T:T	T:C	A:T	T:T	G:G	T:T	G:G	A:A	G:G	T:C	A:C
789	HR_8_720	2019_1st	train set	case	case	G:G	T:T	C:C	G:G	G:G	A:A	G:G	G:G	T:C	T:C	T:C	G:G	A:A	A:A	C:C	T:T	G:G	C:T	A:G	A:A	A:A	A:A	G:A	G:G	C:C	T:A	C:C	T:T	G:G	C:A	A:A	T:C	G:G	T:A	T:C	A:T	T:T	G:G	T:T	G:G	A:A	G:G	T:C	A:A
790	HR_8_761	2019_1st	train set	case	case	G:G	T:T	C:T	G:G	G:G	A:A	G:G	G:G	T:C	T:C	T:C	G:G	A:A	G:G	C:C	T:T	G:G	C:T	A:G	A:A	A:A	A:G	G:A	G:G	C:T	T:A	C:C	T:T	G:G	C:C	A:A	T:T	G:G	A:A	T:C	T:T	C:C	G:G	T:T	G:G	A:A	A:A	T:C	A:C
791	HR_8_712	2019_1st	train set	case	case	G:G	T:T	C:C	G:G	G:G	A:A	G:G	G:G	T:C	T:C	T:T	G:G	A:A	A:A	C:C	T:T	G:G	C:T	A:G	A:A	A:A	A:A	G:A	G:G	T:T	T:T	C:C	T:T	G:G	C:C	A:A	T:C	G:G	A:A	T:C	A:T	T:T	G:G	T:T	A:A	A:A	G:G	T:C	A:C
792	HR_8_753	2019_1st	train set	case	case	G:G	T:T	C:C	G:G	G:G	A:A	G:G	G:G	T:C	T:C	T:C	G:G	A:A	A:A	C:C	T:T	G:G	No Call	G:G	A:A	A:A	A:A	G:A	G:G	T:T	T:T	C:C	T:T	G:G	C:C	A:A	T:T	G:G	A:A	T:C	A:T	C:C	G:G	T:T	A:A	A:A	G:G	T:C	A:C
793	HR_8_704	2019_1st	train set	case	case	G:G	T:T	C:C	G:G	G:G	A:A	G:G	G:G	T:T	T:C	No Call	G:G	A:A	A:A	C:C	T:T	G:G	C:T	A:G	A:A	A:A	A:A	G:A	G:A	C:C	T:T	C:C	T:T	G:G	C:A	A:A	T:C	G:G	A:A	T:C	A:A	T:T	G:G	T:T	G:G	A:G	G:G	T:C	A:A
794	HR_8_745	2019_1st	train set	case	case	G:G	T:T	C:C	G:G	G:G	A:A	G:G	G:G	T:C	T:C	T:T	G:G	A:A	A:G	C:C	T:T	G:G	C:T	A:G	A:A	A:A	A:G	G:A	G:G	C:C	A:A	C:C	T:T	G:G	C:A	A:G	T:T	G:G	T:A	T:C	A:T	C:C	G:G	T:T	G:G	A:A	A:A	T:C	C:C
795	HR_8_696	2019_1st	train set	case	case	G:G	T:T	C:C	G:G	G:G	A:A	G:G	G:G	T:C	T:C	No Call	G:G	A:A	A:A	C:C	T:T	G:G	C:T	A:G	A:A	A:A	A:A	G:A	G:A	C:T	T:T	C:C	T:T	G:G	C:C	A:A	T:C	G:G	T:A	T:C	A:A	T:T	G:G	T:T	A:A	A:A	G:G	T:C	A:C
796	HR_8_737	2019_1st	train set	case	case	No Call	T:C	C:C	G:G	G:G	A:A	G:G	G:G	T:C	T:C	T:T	G:G	A:A	A:A	C:C	T:T	G:G	C:T	A:G	A:A	A:A	A:A	G:A	G:G	C:T	T:T	C:C	T:T	G:G	C:A	A:A	T:C	G:G	A:A	T:C	A:A	T:T	G:T	T:T	G:G	A:A	G:A	T:C	C:C
797	HR_8_688	2019_1st	train set	case	case	No Call	T:T	C:C	G:G	G:G	A:A	G:G	G:G	T:C	T:C	T:C	G:G	A:A	A:A	C:C	T:T	G:G	C:C	G:G	A:A	A:A	A:A	G:A	G:G	T:T	T:T	C:C	T:T	G:G	C:C	A:A	T:C	G:G	T:T	T:C	A:T	T:T	G:T	T:T	G:G	A:A	G:G	T:C	C:C
798	HR_8_721	2019_1st	train set	case	case	G:G	T:C	C:C	G:G	G:G	A:A	G:G	G:G	T:C	T:C	T:C	G:G	A:A	A:A	C:C	T:T	G:G	C:T	A:G	A:A	A:A	A:G	G:A	G:G	C:T	T:T	C:C	T:T	G:G	C:A	A:A	T:C	G:G	A:A	T:C	A:T	T:T	G:G	T:T	A:A	A:A	G:A	T:C	A:C
799	HR_8_767	2019_1st	train set	case	case	G:G	T:T	C:T	G:G	G:G	A:A	G:G	G:G	T:C	T:C	T:T	G:G	A:A	A:A	C:C	T:T	G:G	C:T	A:G	A:A	A:A	A:G	G:A	G:G	C:T	A:A	C:C	T:T	G:G	C:C	A:G	T:T	G:G	A:A	T:C	T:T	C:C	G:G	T:T	G:G	A:A	G:G	T:C	C:C
800	HR_8_714	2019_1st	test set	case	case	G:G	T:T	C:C	G:G	G:G	A:A	G:G	G:G	T:T	T:C	T:C	G:G	A:A	A:G	C:C	T:T	G:G	C:T	A:G	A:A	A:A	A:G	G:A	G:A	C:T	T:T	C:C	T:T	G:G	C:A	A:G	T:T	G:A	T:T	T:C	A:A	T:T	G:G	T:T	G:G	A:A	G:G	T:C	A:A
801	HR_8_759	2019_1st	train set	case	case	G:G	T:T	C:T	G:G	G:G	A:A	G:G	G:G	T:C	T:C	T:C	G:G	A:A	A:A	C:C	T:T	G:G	C:T	A:G	A:A	A:A	A:A	G:A	G:G	C:C	T:T	C:C	T:T	G:G	C:C	A:G	T:C	G:G	T:A	T:C	A:T	C:T	G:G	T:T	G:G	A:G	A:A	T:C	C:C
802	HR_8_706	2019_1st	train set	case	case	No Call	T:T	C:C	G:G	G:G	A:A	G:G	G:T	T:C	T:C	C:C	G:G	A:A	A:A	C:C	T:T	G:G	C:T	A:G	A:A	A:A	A:A	G:A	G:G	C:T	T:T	C:C	T:T	G:G	C:C	A:A	T:C	G:G	T:T	T:C	A:A	T:T	G:G	T:T	A:A	A:A	G:G	T:C	C:C
803	HR_8_698	2019_1st	train set	case	case	No Call	T:C	C:C	G:G	G:G	A:A	G:G	G:G	T:T	T:C	T:C	G:G	A:A	A:A	C:C	T:T	G:G	C:T	A:G	A:A	A:A	A:G	G:A	G:G	T:T	T:T	C:C	T:T	G:G	C:C	A:A	T:T	G:G	T:A	T:C	A:T	C:C	G:T	T:T	G:G	A:A	G:G	T:C	C:C
804	HR_8_743	2019_1st	train set	case	case	G:G	T:T	C:T	G:G	G:G	A:A	G:G	G:G	T:C	T:C	T:C	G:G	A:A	G:G	C:C	T:T	G:G	C:T	A:G	A:A	A:A	A:G	G:A	G:G	C:T	T:A	C:C	T:T	G:G	C:C	A:G	T:T	G:G	A:A	T:C	T:T	C:C	G:G	T:T	G:G	A:A	A:A	T:C	C:C
805	HR_8_690	2019_1st	train set	case	case	G:G	T:T	C:C	G:G	G:G	A:A	G:G	G:G	T:C	T:C	C:C	G:G	A:A	A:A	C:C	T:T	G:G	C:T	A:G	A:A	A:A	A:A	G:A	G:A	C:C	T:T	C:C	T:T	G:G	C:C	A:A	T:C	G:G	T:T	T:C	A:A	T:T	G:G	T:T	A:A	A:A	G:G	T:C	A:C
806	HR_8_727	2019_1st	train set	case	case	No Call	T:T	C:C	G:G	G:G	A:A	G:G	G:G	T:C	T:C	T:C	G:G	A:A	A:A	No Call	T:T	G:G	No Call	G:G	A:A	A:A	A:A	G:A	G:G	T:T	T:T	C:C	T:T	G:G	C:A	A:A	T:T	G:G	A:A	T:C	A:A	C:C	G:T	T:T	G:G	A:A	G:A	T:C	C:C
807	HR_8_674	2019_1st	train set	case	case	G:G	T:T	C:C	G:G	G:G	A:A	G:G	G:G	T:T	T:C	T:T	G:G	A:A	A:A	C:C	T:T	G:G	C:T	A:G	A:A	A:A	A:G	G:A	G:G	C:T	T:T	C:C	T:T	G:G	C:A	A:A	T:C	G:G	A:A	T:C	A:T	T:T	G:T	T:T	G:G	A:A	G:G	T:C	A:C
808	HR_8_719	2019_1st	train set	case	case	No Call	T:T	C:C	G:G	G:G	A:A	G:G	G:T	T:T	T:C	T:C	G:G	A:A	A:A	C:C	T:T	G:G	C:T	A:G	A:A	A:A	A:A	G:A	G:G	C:T	T:T	C:C	T:T	G:G	C:A	A:A	T:C	G:G	T:T	T:C	A:A	T:T	G:G	T:T	G:G	A:G	G:G	T:C	C:C
809	HR_8_711	2019_1st	train set	case	case	No Call	T:T	C:C	G:G	G:G	A:A	G:G	G:G	T:C	T:C	T:C	G:G	A:A	A:A	C:C	T:T	G:G	C:T	A:G	A:A	A:A	A:A	G:A	G:A	C:C	T:T	C:C	T:T	G:G	C:C	A:A	T:C	G:G	T:T	T:C	A:A	T:T	G:G	T:T	A:A	A:A	G:G	T:C	C:C
810	HR_8_703	2019_1st	train set	case	case	G:G	T:T	C:T	G:G	G:G	A:A	G:G	G:G	T:C	T:C	T:C	G:G	A:A	A:G	C:C	T:T	G:G	C:T	A:G	A:A	A:A	A:G	G:A	G:G	C:T	T:T	C:C	T:T	G:G	C:A	A:A	T:T	G:G	A:A	T:C	A:T	C:C	G:G	T:T	No Call	A:A	A:A	T:C	A:C
811	HR_8_695	2019_1st	train set	case	case	G:G	T:T	C:T	G:G	G:G	A:A	G:G	G:G	T:C	T:C	No Call	G:G	A:A	A:A	C:C	T:T	G:G	C:T	A:G	A:A	A:A	A:A	G:A	G:G	C:T	T:T	C:C	T:T	G:G	C:C	A:G	T:C	G:G	A:A	T:C	T:T	T:T	G:G	T:T	G:G	A:G	A:A	T:C	A:C
812	HR_8_738	2019_1st	train set	case	case	G:G	T:T	C:C	G:G	G:G	A:A	G:G	G:G	T:T	T:C	C:C	G:G	A:A	A:A	C:C	T:T	G:G	C:T	A:G	A:A	A:A	A:A	G:A	G:A	C:C	T:T	C:C	T:T	G:G	C:A	A:A	T:C	G:G	A:A	T:C	A:A	T:T	G:G	T:T	A:A	A:G	G:G	T:C	A:C
813	HR_8_687	2019_1st	train set	case	case	G:G	T:T	C:C	G:G	G:G	A:A	G:G	G:T	T:C	T:C	T:T	G:G	A:A	A:A	C:C	T:T	G:G	C:T	A:G	A:A	A:A	A:A	G:A	G:G	C:C	T:T	C:C	T:T	G:G	C:C	A:A	T:C	G:G	T:T	T:C	A:A	T:T	G:G	T:T	A:A	A:A	G:G	T:C	A:C
814	HR_8_730	2019_1st	train set	case	case	G:G	T:T	C:C	G:G	G:G	A:A	G:G	G:G	T:T	T:C	T:T	G:G	A:A	A:A	C:C	T:T	G:G	C:T	A:G	A:A	A:A	A:G	G:A	G:G	C:T	T:T	C:C	T:T	G:G	C:C	A:A	T:C	G:G	A:A	T:C	A:A	T:T	G:G	T:T	A:A	A:A	G:G	T:C	A:C
815	HR_8_715	2019_1st	train set	case	case	G:G	T:T	C:T	G:G	G:G	A:A	G:G	G:G	T:C	T:C	T:C	G:G	A:A	A:A	C:C	T:T	G:G	C:T	A:G	A:A	A:A	A:A	G:A	G:G	C:T	T:A	C:C	T:T	G:G	C:A	A:A	T:C	G:G	A:A	T:C	A:T	T:T	G:G	T:T	No Call	A:G	G:G	T:C	A:C
816	HR_8_758	2019_1st	train set	case	case	G:G	T:T	C:C	G:G	G:G	A:A	G:G	G:G	T:C	T:C	T:T	G:G	A:A	A:A	C:C	T:T	G:G	C:T	A:G	A:A	A:A	A:A	G:A	G:G	C:T	T:T	C:C	T:T	G:G	C:A	A:A	T:T	G:G	T:T	T:C	A:A	C:C	G:G	T:T	A:A	A:A	G:A	T:C	A:C
817	HR_8_707	2019_1st	train set	case	case	G:G	T:T	C:C	C:C	G:G	A:A	G:G	T:T	T:C	T:C	T:T	G:G	A:A	A:A	C:C	T:T	G:G	C:T	A:G	A:A	A:A	A:A	G:A	G:G	C:T	T:T	C:C	T:T	G:G	C:C	A:A	C:C	G:G	A:A	T:C	A:T	C:C	G:G	No Call	A:A	A:G	G:A	T:C	C:C
818	HR_8_699	2019_1st	train set	case	case	G:G	T:T	C:C	G:G	G:G	A:A	G:G	T:T	T:C	T:C	T:T	G:G	A:A	A:A	C:C	T:T	G:G	C:T	A:G	A:A	A:A	A:A	G:A	G:G	C:C	T:T	C:C	T:T	G:G	C:C	A:A	C:C	G:G	A:A	T:C	A:A	C:C	G:G	G:G	A:A	A:G	G:A	T:C	A:C
819	HR_8_742	2019_1st	train set	case	case	G:G	T:T	C:C	G:G	G:G	A:A	G:G	G:T	T:T	T:C	T:C	G:G	A:A	A:A	C:C	T:T	G:G	No Call	G:G	A:A	A:A	A:A	G:A	G:G	C:T	T:T	C:C	T:T	G:G	C:A	A:A	T:C	G:G	A:A	T:C	A:A	T:T	G:G	T:T	A:A	A:G	G:G	T:C	A:C
820	HR_8_691	2019_1st	train set	case	case	G:G	T:T	C:C	G:G	G:G	A:A	G:G	G:G	T:T	T:C	No Call	G:G	A:A	A:A	No Call	T:T	G:G	C:T	A:G	A:A	A:A	A:A	G:A	G:G	C:T	T:T	C:C	T:T	G:G	C:A	A:A	T:C	G:G	T:T	T:C	A:A	T:T	G:G	T:T	G:G	A:A	G:A	T:C	A:C
821	HR_8_683	2019_1st	train set	case	case	G:G	T:T	C:C	G:G	G:G	A:A	G:G	G:G	T:C	T:C	T:T	G:G	A:A	A:A	No Call	T:T	G:G	C:T	A:G	A:A	A:A	A:G	G:A	G:G	C:T	T:T	C:C	T:T	G:G	C:C	A:A	T:C	G:G	A:A	T:C	A:A	T:T	G:G	T:T	A:A	A:A	G:A	T:C	A:C
822	HR_8_726	2019_1st	train set	case	case	G:G	T:T	C:T	G:G	G:G	A:A	G:G	G:G	T:C	T:C	T:C	G:G	A:A	G:G	C:C	T:T	G:G	C:T	A:G	A:A	A:A	A:G	G:A	G:G	C:T	T:T	C:C	T:T	G:G	C:C	A:A	T:T	G:G	T:A	T:C	T:T	C:C	G:G	T:T	G:G	A:A	G:G	T:C	A:A
823	HR_8_718	2019_1st	train set	case	case	No Call	T:T	C:C	G:G	G:G	A:A	G:G	G:T	T:C	T:C	T:C	G:G	A:A	A:A	C:C	T:T	G:G	C:T	A:G	A:A	A:A	A:A	G:A	G:G	C:T	T:T	C:C	T:T	G:G	C:A	A:A	T:C	G:G	T:T	T:C	A:A	T:T	G:G	T:T	G:G	A:A	G:G	T:C	C:C
824	HR_8_710	2019_1st	train set	case	case	G:G	T:T	C:C	G:G	G:G	A:A	G:G	G:G	T:C	T:C	T:C	G:G	A:A	A:A	C:C	T:T	G:G	C:T	A:G	A:A	A:A	A:A	G:A	G:G	C:C	T:T	C:C	T:T	G:G	C:A	A:G	T:C	G:G	A:A	T:C	A:T	T:T	G:G	T:T	G:G	A:G	G:G	T:C	A:A
825	HR_8_755	2019_1st	train set	case	case	G:G	T:T	C:C	G:G	G:G	A:A	G:G	G:G	T:C	T:C	T:T	G:G	A:A	A:A	C:C	T:T	G:G	No Call	G:G	A:A	A:A	A:A	G:A	G:A	C:T	T:T	C:C	T:T	G:G	C:A	A:A	T:C	G:G	A:A	T:C	A:A	T:T	G:G	T:T	A:A	A:G	G:G	T:C	A:C
826	HR_8_702	2019_1st	test set	case	case	G:G	T:T	C:T	G:G	G:G	A:A	G:G	G:G	T:C	T:C	T:C	G:G	A:A	A:A	C:C	T:T	G:G	C:T	A:G	A:A	A:A	A:G	G:A	G:A	T:T	T:T	C:C	T:T	G:G	C:C	A:A	T:T	G:G	T:T	T:C	A:T	C:C	G:G	T:T	G:G	A:A	G:G	T:C	A:C
827	HR_8_747	2019_1st	train set	case	case	G:G	T:T	C:C	G:G	G:G	A:A	G:G	G:G	T:C	T:C	T:C	G:G	A:A	A:A	C:C	T:T	G:G	No Call	G:G	A:A	A:A	A:A	G:A	G:G	T:T	T:T	C:C	T:T	G:G	C:A	A:A	T:C	G:G	A:A	T:C	A:T	T:T	G:G	T:T	G:G	A:A	G:G	T:C	A:C
828	HR_8_694	2019_1st	train set	case	case	G:G	T:T	C:C	G:G	G:G	A:A	G:G	G:G	T:C	T:C	T:T	G:G	A:A	A:G	C:C	T:T	G:G	C:T	A:G	A:A	A:A	A:G	G:A	G:G	C:T	T:T	C:C	T:T	G:G	C:A	A:A	T:T	G:G	A:A	T:C	A:T	C:C	G:G	T:T	G:G	A:A	A:A	T:C	A:C
829	HR_8_739	2019_1st	train set	case	case	G:G	T:T	C:C	G:G	G:G	A:A	G:G	G:T	T:C	T:C	T:T	G:G	A:A	A:A	C:C	T:T	G:G	C:T	A:G	A:A	A:A	A:A	G:A	G:G	C:C	T:T	C:C	T:T	G:G	C:C	A:A	T:C	G:G	T:A	T:C	A:A	T:T	G:G	T:T	G:G	A:A	G:G	T:C	A:C
830	HR_8_686	2019_1st	train set	case	case	No Call	T:T	C:C	G:G	G:G	A:A	G:G	G:G	T:C	T:C	T:C	G:G	A:A	A:A	C:C	T:T	G:G	C:T	A:G	A:A	A:A	A:A	G:A	G:A	C:C	T:T	C:C	T:T	G:G	C:C	A:A	T:C	G:G	A:A	T:C	A:A	T:T	G:G	T:T	A:A	A:A	G:G	T:C	C:C
831	HR_8_731	2019_1st	test set	case	case	G:G	T:T	T:T	G:G	G:G	A:A	G:G	G:G	T:C	T:C	No Call	G:G	A:A	A:A	C:C	T:T	G:G	C:T	A:G	A:A	A:A	G:G	G:A	G:A	T:T	T:A	C:C	T:T	G:G	C:C	A:A	T:T	G:G	T:T	T:C	T:T	C:C	G:G	T:T	G:G	A:A	G:G	T:C	A:A
832	HR_8_678	2019_1st	train set	case	case	G:G	T:T	C:C	G:G	G:G	A:A	G:G	G:G	T:C	T:C	C:C	G:G	A:A	A:A	C:C	T:T	G:G	C:T	A:G	A:A	A:A	A:A	G:A	G:A	C:T	T:T	C:C	T:T	G:G	C:A	A:A	T:C	G:G	T:T	T:C	A:A	T:T	G:G	T:T	A:A	A:A	G:G	T:C	A:C
833	HR_8_765	2019_1st	train set	case	case	G:G	T:T	C:T	G:G	G:G	A:A	G:G	G:G	T:C	T:C	T:T	G:G	A:A	G:G	C:C	T:T	G:G	C:T	A:G	A:A	A:A	A:G	G:A	G:G	C:T	T:T	C:C	T:T	G:G	C:C	A:G	T:T	G:G	A:A	T:C	T:T	C:C	G:G	T:T	G:G	A:A	A:A	T:C	C:C
834	HR_8_716	2019_1st	train set	case	case	No Call	T:C	C:C	G:G	G:G	A:A	G:G	G:G	T:T	T:C	No Call	G:G	A:A	A:A	C:C	T:T	G:G	C:T	A:G	A:A	A:A	A:G	G:A	G:G	C:T	T:T	C:C	T:T	G:G	C:A	A:A	T:C	G:G	T:T	T:C	A:A	T:T	G:T	T:T	G:G	A:A	G:A	T:C	C:C
835	HR_8_708	2019_1st	train set	case	case	G:G	T:T	C:C	G:G	G:G	A:A	G:G	G:G	T:C	T:C	C:C	G:G	A:A	A:A	C:C	T:T	G:G	C:T	A:G	A:A	A:A	A:A	G:A	G:A	C:C	T:T	C:C	T:T	G:G	C:C	A:A	T:C	G:G	T:T	T:C	A:A	T:T	G:G	T:T	G:G	A:A	G:G	T:C	A:C
836	HR_8_749	2019_1st	train set	case	case	No Call	T:T	C:C	G:G	G:G	A:A	G:G	G:G	T:T	T:C	T:C	G:G	A:A	A:A	C:C	T:T	G:G	No Call	G:G	A:A	A:A	A:G	G:A	G:G	T:T	T:T	C:C	T:T	G:G	C:C	A:A	T:T	G:G	A:A	T:C	A:T	C:C	G:T	T:T	G:G	A:A	G:A	T:C	C:C
837	HR_8_700	2019_1st	train set	case	case	G:G	T:T	C:C	G:G	G:G	A:A	G:G	G:T	T:C	T:C	T:C	G:G	A:A	A:A	C:C	T:T	G:G	C:T	A:G	A:A	A:A	A:A	G:A	G:G	C:C	T:T	C:C	T:T	G:G	C:C	A:A	T:C	G:G	A:A	T:C	A:A	T:T	G:G	T:T	A:A	A:A	G:G	T:C	A:C
838	HR_8_741	2019_1st	test set	case	case	G:G	T:T	C:T	G:G	G:G	A:A	G:G	G:G	T:C	T:C	T:C	G:G	A:A	A:A	C:C	T:T	G:G	C:T	A:G	A:A	A:A	A:G	G:A	G:A	T:T	T:T	C:C	T:T	G:G	C:C	A:A	T:T	G:G	T:T	T:C	A:T	C:C	G:G	T:T	G:G	A:A	G:G	T:C	A:C
839	HR_8_692	2019_1st	test set	case	case	G:G	T:T	C:C	G:G	G:G	A:A	G:G	G:T	T:T	T:C	C:C	G:G	A:A	A:A	C:C	T:T	G:G	C:T	A:G	A:A	A:A	A:A	G:A	G:G	C:C	T:T	C:C	T:T	G:G	C:A	A:A	T:C	G:G	T:A	T:C	A:A	T:T	G:G	T:T	A:A	A:G	G:G	T:C	A:C
840	HR_8_733	2019_1st	train set	case	case	No Call	T:T	C:C	G:G	G:G	A:A	G:G	G:G	T:C	T:C	No Call	G:G	A:A	A:A	C:C	T:T	G:G	C:T	A:G	A:A	A:A	A:A	G:A	G:G	C:T	T:T	C:C	T:T	G:G	C:C	A:A	T:T	G:G	A:A	T:C	T:T	C:C	G:T	T:T	G:G	A:A	G:A	T:C	C:C
841	HR_8_684	2019_1st	train set	case	case	G:G	T:T	C:C	G:G	G:G	A:A	G:G	G:T	T:C	T:C	T:C	G:G	A:A	No Call	C:C	T:T	G:G	No Call	G:G	A:A	A:A	A:A	G:A	G:G	C:T	T:T	C:C	T:T	G:G	C:C	A:A	C:C	G:G	A:A	T:C	A:A	C:C	G:G	T:G	A:A	A:G	G:A	T:C	A:C
842	HR_8_725	2019_1st	train set	case	case	No Call	T:T	C:C	G:G	G:G	A:A	G:G	G:G	T:C	T:C	C:C	G:G	A:A	A:A	C:C	T:T	G:G	No Call	G:G	A:A	A:A	A:A	G:A	G:A	C:T	T:T	C:C	T:T	G:G	C:C	A:A	T:C	G:G	T:T	T:C	A:A	T:T	G:G	T:T	A:A	A:G	G:G	T:C	C:C
843	HR_8_676	2019_1st	train set	case	case	G:G	T:T	C:C	G:G	G:G	A:A	G:G	G:T	T:C	T:C	C:C	G:G	A:A	A:A	C:C	T:T	G:G	C:T	A:G	A:A	A:A	A:A	G:A	G:G	C:C	T:T	C:C	T:T	G:G	C:C	A:A	T:C	G:G	T:T	T:C	A:A	T:T	G:G	T:T	G:G	A:A	G:G	T:C	A:A
844	HR_8_764	2019_1st	train set	case	case	No Call	T:T	C:C	G:G	G:G	A:A	G:G	G:G	T:T	T:C	No Call	G:G	A:A	A:A	C:C	T:T	G:G	C:T	A:G	A:A	A:A	A:G	G:A	G:G	T:T	T:T	C:C	T:T	G:G	C:C	A:A	T:T	G:G	T:T	T:C	A:T	C:C	G:T	T:T	A:A	A:A	G:A	T:C	C:C
845	HR_8_701	2019_1st	train set	case	case	G:G	T:T	C:C	G:G	G:G	A:A	G:G	G:G	T:C	T:C	T:T	G:G	A:A	A:A	C:C	T:T	G:G	C:T	A:G	A:A	A:A	A:A	G:A	G:G	C:T	A:A	C:C	T:T	G:G	C:A	A:G	T:C	G:G	A:A	T:C	A:T	C:T	G:G	T:T	G:G	A:G	G:G	T:C	A:C
846	HR_8_748	2019_1st	train set	case	case	G:G	T:T	C:C	G:G	G:G	A:A	G:G	G:T	T:T	T:C	C:C	G:G	A:A	A:A	C:C	T:T	G:G	C:T	A:G	A:A	A:A	A:A	G:A	G:G	C:T	T:T	C:C	T:T	G:G	C:A	A:A	T:C	G:G	T:A	T:C	A:A	T:T	G:G	T:T	A:A	A:G	G:G	T:C	A:C
847	HR_8_693	2019_1st	train set	case	case	G:G	T:T	C:T	G:G	G:G	A:A	G:G	G:G	T:C	T:C	T:C	G:G	A:A	G:G	C:C	T:T	G:G	C:T	A:G	A:A	A:A	A:G	G:A	G:G	C:T	T:A	C:C	T:T	G:G	C:C	A:G	T:T	G:G	A:A	T:C	T:T	C:C	G:G	T:T	G:G	A:A	A:A	T:C	A:C
848	HR_8_740	2019_1st	train set	case	case	G:G	T:T	C:C	G:G	G:G	A:A	G:G	G:T	T:T	T:C	C:C	G:G	A:A	A:A	C:C	T:T	G:G	C:T	A:G	A:A	A:A	A:A	G:A	G:G	C:T	T:T	C:C	T:T	G:G	C:A	A:A	T:C	G:G	T:A	T:C	A:A	T:T	G:G	T:T	A:A	A:G	G:G	T:C	A:C
849	HR_8_685	2019_1st	train set	case	case	G:G	T:T	C:C	G:G	G:G	A:A	G:G	G:G	T:C	T:C	T:C	G:G	A:A	A:A	C:C	T:T	G:G	C:T	A:G	A:A	A:A	A:G	G:A	G:G	T:T	T:T	C:C	T:T	G:G	C:C	A:A	T:C	G:G	T:A	T:C	A:T	T:T	G:T	T:T	A:A	A:A	G:A	T:C	A:C
850	HR_8_677	2019_1st	train set	case	case	No Call	T:T	C:C	G:G	G:G	A:A	G:G	G:T	T:T	T:C	No Call	G:G	A:A	A:A	C:C	T:T	G:G	C:T	A:G	A:A	A:A	A:A	G:A	G:G	C:C	T:T	C:C	T:T	G:G	C:A	A:A	T:C	G:G	A:A	T:C	A:A	T:T	G:G	T:T	A:A	A:G	G:G	T:C	C:C
851	HR_8_724	2019_1st	train set	case	case	G:G	T:T	C:T	G:G	G:G	A:A	G:G	G:G	T:C	T:C	T:C	G:G	A:A	A:G	C:C	T:T	G:G	C:T	A:G	A:A	A:A	A:G	G:A	G:G	C:T	A:A	C:C	T:T	G:G	C:A	A:A	T:T	G:G	A:A	T:C	A:T	C:C	G:G	T:T	G:G	A:G	G:G	T:C	A:C
852	HR_9_864	2019_1st	train set	case	case	G:G	T:T	C:C	G:G	G:G	A:A	G:G	G:G	T:C	T:C	T:T	G:G	A:A	A:A	C:C	T:T	G:G	C:T	A:G	A:A	A:A	A:G	G:A	G:G	C:C	T:A	C:C	T:T	G:G	C:A	A:A	T:T	G:G	A:A	T:C	A:T	C:C	G:G	T:T	G:G	A:A	G:G	T:C	A:C
853	HR_9_809	2019_1st	train set	case	case	G:G	T:T	C:C	G:G	G:G	A:A	G:G	G:G	T:C	T:C	T:T	G:G	A:A	A:A	C:C	T:T	G:G	C:T	A:G	A:A	A:A	A:A	G:A	G:G	C:C	T:A	C:C	T:T	G:G	C:C	A:A	T:C	G:G	A:A	T:C	T:T	C:T	G:G	T:T	G:G	A:A	G:A	T:C	A:C
854	HR_9_856	2019_1st	train set	case	case	G:G	T:T	C:C	G:G	G:G	A:A	G:G	G:G	T:C	T:C	T:C	G:G	A:A	A:A	C:C	T:T	G:G	C:T	A:G	A:A	A:A	A:A	G:A	G:A	C:T	T:T	C:C	T:T	G:G	C:A	A:A	T:C	G:G	T:T	T:C	A:A	C:T	G:G	T:T	G:G	A:A	G:G	T:C	C:C
855	HR_9_801	2019_1st	train set	case	case	G:G	T:T	C:T	G:G	G:G	A:A	G:G	G:G	T:C	T:C	T:T	G:G	A:A	A:A	C:C	T:T	G:G	C:T	A:G	A:A	A:A	A:G	G:A	G:G	C:T	T:A	C:C	T:T	G:G	C:C	A:G	T:T	G:G	A:A	T:C	T:T	C:C	G:G	T:T	G:G	A:G	G:A	T:C	C:C
856	HR_9_848	2019_1st	train set	case	case	G:G	T:T	C:C	G:G	G:G	A:A	G:G	G:T	T:C	T:C	T:T	G:G	A:A	A:A	C:C	T:T	G:G	C:T	A:G	A:A	A:A	A:A	G:A	G:G	C:T	T:T	C:C	T:T	G:G	C:A	A:A	T:C	G:G	T:A	T:C	A:A	C:T	G:G	T:T	G:G	A:A	G:G	T:C	A:C
857	HR_9_793	2019_1st	train set	case	case	G:G	T:T	C:C	G:G	G:G	A:A	G:G	G:T	T:C	T:C	T:T	G:G	A:G	A:A	C:C	T:T	G:G	C:T	A:G	A:A	A:A	A:A	G:A	G:G	C:C	T:T	C:C	T:T	G:G	C:A	A:A	T:C	G:G	T:A	T:C	A:A	C:T	G:G	T:T	G:G	A:A	G:G	T:C	A:C
858	HR_9_840	2019_1st	train set	case	case	No Call	T:T	C:C	G:G	G:G	A:A	G:G	G:G	T:C	T:C	T:T	G:G	A:G	A:A	C:C	T:T	G:G	C:T	A:G	A:A	A:A	A:A	G:A	G:A	C:C	T:T	C:C	T:T	G:G	C:A	A:A	T:C	G:G	A:A	T:C	A:A	C:T	G:G	T:T	G:G	A:A	G:G	T:C	C:C
859	HR_9_785	2019_1st	train set	case	case	G:G	T:T	C:T	G:G	G:G	A:A	G:G	G:G	T:C	T:C	T:T	G:G	A:A	A:A	C:C	T:T	G:G	C:T	A:G	A:A	A:A	A:G	G:A	G:A	T:T	T:A	C:C	T:T	G:A	C:C	A:A	T:T	G:G	T:T	T:C	A:T	C:C	G:G	T:T	A:A	A:A	G:G	T:C	A:C
860	HR_9_832	2019_1st	train set	case	case	G:G	T:T	C:C	G:G	G:G	A:A	G:G	G:T	T:C	T:C	T:T	G:G	A:A	A:A	C:C	T:T	G:G	T:T	G:G	A:A	A:A	A:A	G:A	G:G	C:T	T:T	C:C	T:T	G:G	C:A	A:A	T:C	G:G	T:A	T:C	A:A	C:T	G:G	T:T	G:G	A:G	G:G	T:C	A:A
861	HR_9_777	2019_1st	train set	case	case	G:G	T:T	C:C	G:G	G:G	A:A	G:G	G:G	T:C	T:C	T:T	G:G	A:A	A:A	C:C	T:T	G:G	C:T	A:G	A:A	A:A	A:A	G:A	G:G	C:T	T:T	C:C	T:T	G:A	C:C	A:A	T:C	G:G	T:T	T:C	A:T	C:T	G:G	T:T	A:A	A:A	G:G	T:C	A:C
862	HR_9_769	2019_1st	train set	case	case	G:G	T:T	C:C	G:G	G:G	A:A	G:G	G:T	T:C	T:C	T:T	G:G	A:A	A:A	C:C	T:T	G:G	C:T	A:G	A:A	A:A	A:A	G:A	G:G	C:C	T:T	C:C	T:T	G:G	C:C	A:A	T:C	G:G	A:A	T:C	A:A	C:T	G:G	T:T	G:A	A:A	G:G	T:C	A:C
863	HR_9_816	2019_1st	train set	case	case	G:G	T:T	C:C	G:G	G:G	A:A	G:G	G:T	T:C	T:C	T:T	G:G	A:G	A:A	C:C	T:T	G:G	C:T	A:G	A:A	A:A	A:A	G:A	G:G	C:C	T:T	C:C	T:T	G:G	C:A	A:A	T:C	G:G	A:A	T:C	A:A	C:T	G:G	T:T	G:A	A:A	G:G	T:C	A:C
864	HR_9_857	2019_1st	train set	case	case	G:G	T:T	C:T	G:G	G:G	A:A	G:G	G:G	T:C	T:C	T:T	G:G	A:A	A:A	C:C	T:T	G:G	C:T	A:G	A:A	A:A	A:G	G:A	G:G	C:T	T:T	C:C	T:T	G:G	C:C	A:G	T:T	G:G	A:A	T:C	T:T	C:C	G:G	T:T	G:G	A:G	G:A	T:C	A:A
865	HR_9_808	2019_1st	train set	case	case	G:G	T:T	C:T	G:G	G:G	A:A	G:G	G:G	T:C	T:C	T:T	G:G	A:A	A:A	C:C	T:T	G:G	C:T	A:G	A:A	A:A	A:G	G:A	G:G	C:T	T:T	C:C	T:T	G:G	C:A	A:G	T:T	G:G	A:A	T:C	T:T	C:C	G:G	T:T	G:G	A:A	G:G	T:C	C:C
866	HR_9_800	2019_1st	train set	case	case	G:G	T:T	C:C	G:G	G:G	A:A	G:G	G:G	T:C	T:C	T:T	G:G	A:A	A:A	C:C	T:T	G:G	C:T	A:G	A:A	A:A	A:A	G:A	G:G	T:T	T:T	C:C	T:T	G:G	C:C	A:A	T:C	G:G	A:A	T:C	A:A	C:T	G:T	T:T	A:A	A:A	G:G	T:C	C:C
867	HR_9_841	2019_1st	train set	case	case	G:G	T:T	C:C	C:C	G:G	A:A	G:G	G:T	T:C	T:C	T:T	G:G	A:G	A:A	C:C	T:T	G:G	C:T	A:G	A:A	A:A	A:A	G:A	G:G	C:C	T:T	C:C	T:T	G:G	C:C	A:A	T:C	G:G	A:A	T:C	A:A	C:C	G:G	G:G	G:G	A:G	G:G	T:C	A:C
868	HR_9_792	2019_1st	train set	case	case	G:G	T:T	C:C	G:G	G:G	A:A	G:G	G:G	T:C	T:C	T:T	G:G	A:A	A:A	C:C	T:T	G:G	T:T	G:G	A:A	A:A	A:A	G:A	G:G	T:T	T:T	C:C	T:T	G:A	C:C	A:A	T:T	G:G	T:T	T:C	A:T	C:C	G:G	T:T	A:A	A:A	G:G	T:C	A:C
869	HR_9_833	2019_1st	train set	case	case	G:G	T:T	C:T	G:G	G:G	A:A	G:G	G:G	T:C	T:C	T:T	G:G	A:A	A:G	C:C	T:T	G:G	C:T	A:G	A:A	A:A	A:G	G:A	G:G	C:T	T:T	C:C	T:T	G:G	C:A	A:G	T:T	G:G	A:A	T:C	A:T	C:C	G:G	T:T	G:G	A:G	G:A	T:C	A:C
870	HR_9_784	2019_1st	train set	case	case	G:G	T:T	C:C	G:G	G:G	A:A	G:G	G:T	T:T	T:C	T:T	G:G	A:G	A:A	C:C	T:T	G:G	C:T	G:G	A:A	A:A	A:A	G:A	G:G	C:T	T:T	C:C	T:T	G:G	C:A	A:A	T:C	G:G	T:T	T:C	A:A	C:T	G:G	T:T	G:A	A:G	G:G	T:C	C:C
871	HR_9_825	2019_1st	train set	case	case	G:G	T:T	T:T	G:G	G:G	A:A	G:G	G:G	T:C	T:C	T:T	G:G	A:A	A:A	C:C	T:T	G:G	C:T	A:G	A:A	A:A	G:G	G:A	G:A	T:T	T:A	C:C	T:T	G:A	C:C	A:A	T:T	G:G	T:T	T:C	T:T	C:C	G:G	T:T	G:G	A:A	G:G	T:C	A:C
872	HR_9_776	2019_1st	train set	case	case	G:G	T:T	C:T	G:G	G:G	A:A	G:G	G:G	T:C	T:C	T:T	G:G	A:A	A:A	C:C	T:T	G:G	C:T	A:G	A:A	A:A	A:A	G:A	G:G	C:T	T:T	C:C	T:T	G:G	C:C	A:A	T:T	G:G	A:A	T:C	T:T	C:C	G:G	T:T	G:G	A:A	G:A	T:C	A:A
873	HR_9_817	2019_1st	train set	case	case	G:G	T:T	C:C	G:G	G:G	A:A	G:G	G:G	T:T	T:C	T:T	G:G	A:A	A:A	C:C	T:T	G:G	C:T	A:G	A:A	A:A	A:A	G:A	G:G	C:T	T:T	C:C	T:T	G:G	C:A	A:A	T:T	G:G	T:T	T:C	A:A	C:C	G:G	T:T	A:A	A:A	G:G	T:C	A:A
874	HR_9_863	2019_1st	train set	case	case	G:G	T:T	C:C	G:G	G:G	A:A	G:G	G:G	T:T	T:C	T:T	G:G	A:A	A:A	C:C	T:T	G:G	C:T	A:G	A:A	A:A	A:A	G:A	G:G	C:T	T:T	C:C	T:T	G:A	C:C	A:A	T:T	G:G	T:T	T:C	A:T	C:C	G:T	T:T	G:G	A:A	G:G	T:C	A:C
875	HR_9_810	2019_1st	train set	case	case	G:G	T:T	C:C	G:G	G:G	A:A	G:G	G:G	T:C	T:C	T:T	G:G	A:G	A:A	C:C	T:T	G:G	C:T	A:G	A:A	A:A	A:A	G:A	G:A	C:C	T:T	C:C	T:T	G:G	C:A	A:A	T:C	G:G	A:A	T:C	A:A	C:T	G:G	T:T	G:A	A:A	G:G	T:C	A:C
876	HR_9_855	2019_1st	train set	case	case	G:G	T:T	C:T	G:G	G:G	A:A	G:G	G:G	T:C	T:C	T:T	G:G	A:A	A:A	C:C	T:T	G:G	C:T	A:G	A:A	A:A	G:G	G:A	G:A	T:T	T:A	C:C	T:T	G:A	C:C	A:A	T:T	G:G	T:T	T:C	T:T	C:C	G:G	T:T	A:A	A:A	G:G	T:C	A:C
877	HR_9_802	2019_1st	train set	case	case	G:G	T:T	C:C	G:G	G:G	A:A	G:G	G:G	T:C	T:C	T:T	G:G	A:A	A:A	C:C	T:T	G:G	C:T	G:G	A:A	A:A	A:A	G:A	G:G	T:T	T:T	C:C	T:T	G:A	C:A	A:A	T:C	G:G	T:T	T:C	A:T	C:T	G:T	T:T	G:G	A:A	G:G	T:C	A:C
878	HR_9_847	2019_1st	train set	case	case	G:G	T:T	C:T	G:G	G:G	A:A	G:G	G:G	T:C	T:C	T:T	G:G	A:A	G:G	C:C	T:T	G:G	C:T	A:G	A:A	A:A	A:G	G:A	G:G	C:T	T:A	C:C	T:T	G:G	C:C	A:A	T:T	G:G	A:A	T:C	T:T	C:C	G:G	T:T	G:G	A:A	G:A	T:C	C:C
879	HR_9_794	2019_1st	test set	case	case	G:G	T:T	C:C	G:G	G:G	A:A	G:G	G:T	T:T	T:C	T:T	G:G	A:A	A:A	C:C	T:T	G:G	C:T	A:G	A:A	A:A	A:A	G:A	G:G	C:C	T:T	C:C	T:T	G:G	C:C	A:A	T:C	G:G	T:T	T:C	A:A	C:T	G:G	T:T	G:A	A:G	G:G	T:C	A:C
880	HR_9_839	2019_1st	train set	case	case	G:G	T:T	C:C	G:G	G:G	A:A	G:G	G:T	T:C	T:C	T:T	G:G	A:G	A:A	C:C	T:T	G:G	C:T	A:G	A:A	A:A	A:A	G:A	G:G	C:C	T:T	C:C	T:T	G:G	C:A	A:A	T:C	G:G	A:A	T:C	A:A	C:T	G:G	T:T	G:A	A:A	G:G	T:C	A:C
881	HR_9_786	2019_1st	train set	case	case	G:G	T:T	C:C	G:G	G:G	A:A	G:G	G:G	T:C	T:C	T:T	G:G	A:A	A:A	C:C	T:T	G:G	C:T	A:G	A:A	A:A	A:G	G:A	G:G	C:T	T:A	C:C	T:T	G:G	C:A	A:G	T:T	G:G	A:A	T:C	A:T	C:C	G:G	T:T	G:G	A:A	G:G	T:C	A:C
882	HR_9_831	2019_1st	train set	case	case	G:G	T:T	C:C	G:G	G:G	A:A	G:G	G:T	T:C	T:C	T:C	G:G	A:G	A:A	C:C	T:T	G:G	T:T	G:G	A:A	A:A	A:A	G:A	G:G	C:T	T:T	C:C	T:T	G:G	C:C	A:A	T:C	G:G	T:T	T:C	A:A	C:T	G:G	T:T	G:G	A:A	G:G	T:C	A:C
883	HR_9_778	2019_1st	train set	case	case	G:G	T:T	C:C	G:G	G:G	A:A	G:G	G:T	T:C	T:C	T:T	G:G	A:A	A:A	C:C	T:T	G:G	C:T	A:G	A:A	A:A	A:A	G:A	G:G	C:T	T:T	C:C	T:T	G:G	C:A	A:A	T:C	G:G	T:A	T:C	A:A	C:T	G:G	T:T	G:A	A:A	G:G	T:C	A:C
884	HR_9_823	2019_1st	test set	case	case	G:G	T:T	C:C	C:C	G:G	A:A	G:G	G:T	T:T	T:C	T:T	G:G	A:G	A:A	C:C	T:T	G:G	C:T	A:G	A:A	A:A	A:A	G:A	G:G	C:T	T:T	C:C	T:T	G:G	C:C	A:A	T:C	G:G	A:A	T:C	A:T	C:C	G:G	T:G	A:A	A:G	G:A	T:C	A:C
885	HR_9_770	2019_1st	train set	case	case	G:G	T:T	C:C	G:G	G:G	A:A	G:G	G:G	T:C	T:C	T:T	G:G	A:A	A:A	C:C	T:T	G:G	C:T	A:G	A:A	A:A	A:A	G:A	G:A	C:C	T:T	C:C	T:T	G:G	C:C	A:A	T:C	G:G	T:T	T:C	A:A	C:T	G:G	T:T	G:A	A:A	G:G	T:C	A:C
886	HR_9_858	2019_1st	train set	case	case	G:G	T:T	C:C	G:G	G:G	A:A	G:G	G:G	T:C	T:C	T:T	G:G	A:A	A:A	C:C	T:T	G:G	C:T	A:G	A:A	A:A	A:G	G:A	G:G	C:C	T:A	C:C	T:T	G:G	C:A	A:A	T:T	G:G	A:A	T:C	A:T	C:C	G:G	T:T	G:G	A:G	G:A	T:C	A:C
887	HR_9_807	2019_1st	train set	case	case	G:G	T:T	C:C	C:C	G:G	A:A	G:G	G:T	T:T	T:C	T:T	G:G	A:G	A:A	C:C	T:T	G:G	C:T	A:G	A:A	A:A	A:A	G:A	G:G	C:T	T:T	C:C	T:T	G:G	C:C	A:A	T:T	G:G	A:A	T:C	A:T	C:C	G:G	T:G	A:A	A:G	G:G	T:C	A:C
888	HR_9_850	2019_1st	train set	case	case	G:G	T:T	C:C	G:G	G:G	A:A	G:G	G:G	T:T	T:C	T:T	G:G	A:A	A:A	C:C	T:T	G:G	C:T	A:G	A:A	A:A	A:A	G:A	G:G	C:T	T:T	C:C	T:T	G:G	C:C	A:A	T:C	G:G	T:T	T:C	A:T	C:T	G:T	T:T	A:A	A:A	G:G	T:C	A:C
889	HR_9_799	2019_1st	train set	case	case	G:G	T:T	C:C	G:G	G:G	A:A	G:G	G:G	T:C	T:C	T:T	G:G	A:A	A:A	C:T	T:T	G:G	C:T	A:G	A:A	A:A	A:G	G:A	G:G	C:T	T:T	C:C	T:T	G:G	C:A	A:A	T:T	G:G	A:A	T:C	A:T	C:C	G:T	T:T	G:G	A:A	G:A	T:C	A:C
890	HR_9_834	2019_1st	train set	case	case	G:G	T:T	C:C	G:G	G:G	A:A	G:G	G:G	T:C	T:C	T:T	G:G	A:A	A:A	C:C	T:T	G:G	C:T	A:G	A:A	A:A	A:G	G:A	G:G	T:T	T:T	C:C	T:T	G:G	C:C	A:A	T:C	G:G	T:T	T:C	A:A	C:T	G:T	T:T	G:G	A:A	G:G	T:C	C:C
891	HR_9_783	2019_1st	train set	case	case	G:G	T:T	C:T	G:G	G:G	A:A	G:G	G:G	T:C	T:C	T:T	G:G	A:A	A:A	C:C	T:T	G:G	C:T	A:G	A:A	A:A	A:A	G:A	G:G	C:T	T:A	C:C	T:T	G:G	C:C	A:G	T:T	G:G	A:A	T:C	T:T	C:C	G:G	T:T	G:G	A:G	G:A	T:C	A:C
892	HR_9_826	2019_1st	train set	case	case	G:G	T:T	C:C	G:G	G:G	A:A	G:G	G:G	T:C	T:C	T:C	G:G	A:G	A:A	C:C	T:T	G:G	C:T	A:G	A:A	A:A	A:A	G:A	G:A	C:T	T:T	C:C	T:T	G:G	C:A	A:A	T:C	G:G	T:A	T:C	A:A	C:T	G:G	T:T	G:A	A:A	G:G	T:C	C:C
893	HR_9_818	2019_1st	train set	case	case	G:G	T:T	C:C	G:G	G:G	A:A	G:G	G:T	T:C	T:C	T:T	G:G	A:G	A:A	C:C	T:T	G:G	C:T	A:G	A:A	A:A	A:A	G:A	G:G	C:T	T:T	C:C	T:T	G:G	C:C	A:A	T:C	G:G	T:A	T:C	A:A	C:T	G:G	T:T	G:A	A:A	G:G	T:C	C:C
894	HR_9_862	2019_1st	train set	case	case	G:G	T:T	C:C	G:G	G:G	A:A	G:G	G:G	T:C	T:C	T:C	G:G	A:A	A:A	C:C	T:T	G:G	C:T	A:G	A:A	A:A	A:A	G:A	G:A	C:C	T:T	C:C	T:T	G:G	C:C	A:A	T:C	G:G	A:A	T:C	A:A	C:T	G:G	T:T	G:A	A:A	G:G	T:C	C:C
895	HR_9_811	2019_1st	train set	case	case	G:G	T:T	C:T	G:G	G:G	A:A	G:G	G:G	T:C	T:C	T:T	G:G	A:A	A:A	C:C	T:T	G:G	C:T	A:G	A:A	A:A	A:A	G:A	G:G	C:T	T:A	C:C	T:T	G:G	C:A	A:A	T:T	G:G	A:A	T:C	A:T	C:C	G:G	T:T	G:G	A:A	G:G	T:C	A:C
896	HR_9_854	2019_1st	test set	case	case	G:G	T:T	C:C	G:G	G:G	A:A	G:G	G:T	T:C	T:C	T:T	G:G	A:A	A:A	C:C	T:T	G:G	C:T	A:G	A:A	A:A	A:A	G:A	G:G	C:T	T:T	C:C	T:T	G:G	C:C	A:A	T:C	G:G	T:T	T:C	A:A	C:T	G:G	T:T	G:A	A:A	G:G	T:C	C:C
897	HR_9_803	2019_1st	train set	case	case	G:G	T:T	C:T	G:G	G:G	A:A	G:G	G:G	T:C	T:C	T:T	G:G	A:A	A:A	C:C	T:T	G:G	C:T	A:G	A:A	A:A	A:G	G:A	G:A	T:T	T:A	C:C	T:T	G:A	C:A	A:A	T:C	G:G	T:T	T:C	A:T	C:T	G:T	T:T	G:A	A:A	G:G	T:C	No Call
898	HR_9_846	2019_1st	train set	case	case	G:G	T:T	C:T	G:G	G:G	A:A	G:G	G:G	T:C	T:C	T:T	G:G	A:A	G:G	C:C	T:T	G:G	C:T	A:G	A:A	A:A	A:A	G:A	G:G	C:T	T:T	C:C	T:T	G:G	C:A	A:A	T:C	G:G	A:A	T:C	T:T	C:T	G:G	T:T	G:G	A:G	G:G	T:C	A:C
899	HR_9_795	2019_1st	train set	case	case	G:G	T:T	C:T	G:G	G:G	A:A	G:G	G:G	T:C	T:C	T:T	G:G	A:A	A:A	C:C	T:T	G:G	C:T	A:G	A:A	A:A	A:A	G:A	G:G	C:T	T:T	C:C	T:T	G:G	C:C	A:G	T:C	G:G	A:A	T:C	T:T	C:T	G:G	T:T	G:G	A:G	G:A	T:C	C:C
900	HR_9_779	2019_1st	train set	case	case	G:G	T:T	C:T	G:G	G:G	A:A	G:G	G:G	T:C	T:C	T:T	G:G	A:A	A:A	C:C	T:T	G:G	C:T	A:G	A:A	A:A	A:G	G:A	G:G	C:T	T:A	C:C	T:T	G:G	C:A	A:A	T:T	G:G	A:A	T:C	A:T	C:C	G:G	T:T	G:G	A:G	G:G	T:C	C:C
901	HR_9_822	2019_1st	train set	case	case	G:G	T:T	C:T	G:G	G:G	A:A	G:G	G:G	T:C	T:C	T:T	G:G	A:A	A:A	C:C	T:T	G:G	C:T	A:G	A:A	A:A	A:A	G:A	G:G	C:T	T:A	C:C	T:T	G:G	C:A	A:A	T:C	G:G	A:A	T:C	A:T	C:T	G:G	T:T	G:G	A:A	G:G	T:C	A:C
902	HR_9_771	2019_1st	train set	case	case	G:G	T:T	C:C	G:G	G:G	A:A	G:G	G:G	T:C	T:C	T:T	G:G	A:A	A:A	C:C	T:T	G:G	C:T	A:G	A:A	A:A	A:G	G:A	G:G	C:C	T:T	C:C	T:T	G:G	C:A	A:A	T:C	G:G	A:A	T:C	A:T	C:T	G:G	T:T	G:G	A:A	G:G	T:C	C:C
903	HR_9_859	2019_1st	train set	case	case	G:G	T:T	C:C	G:G	G:G	A:A	G:G	G:T	T:T	T:C	T:T	G:G	A:G	A:A	C:C	T:T	G:G	C:T	A:G	A:A	A:A	A:A	G:A	G:G	C:C	T:T	C:C	T:T	G:G	C:A	A:A	T:C	G:G	T:T	T:C	A:A	C:T	G:G	T:T	G:G	A:G	G:G	T:C	C:C
904	HR_9_806	2019_1st	train set	case	case	G:G	T:T	C:C	G:G	G:G	A:A	G:G	G:T	T:C	T:C	T:T	G:G	A:G	A:A	C:C	T:T	G:G	C:T	A:G	A:A	A:A	A:A	G:A	G:G	C:C	T:T	C:C	T:T	G:G	C:C	A:A	T:C	G:G	T:A	T:C	A:A	C:T	G:G	T:T	G:G	A:A	G:G	T:C	A:C
905	HR_9_851	2019_1st	train set	case	case	G:G	T:T	C:C	G:G	G:G	A:A	G:G	G:G	T:C	T:C	T:C	G:G	A:G	A:A	C:C	T:T	G:G	T:T	G:G	A:A	A:A	A:A	G:A	G:A	C:T	T:T	C:C	T:T	G:G	C:C	A:A	T:C	G:G	T:T	T:C	A:A	C:T	G:G	T:T	G:A	A:A	G:G	T:C	C:C
906	HR_9_843	2019_1st	train set	case	case	G:G	T:T	C:T	G:G	G:G	A:A	G:G	G:G	T:C	T:C	T:T	G:G	A:A	A:A	C:C	T:T	G:G	C:T	A:G	A:A	A:A	A:A	G:A	G:G	C:T	T:T	C:C	T:T	G:G	C:C	A:G	T:T	G:G	A:A	T:C	T:T	C:C	G:G	T:T	G:G	A:A	G:A	T:C	A:C
907	HR_9_790	2019_1st	train set	case	case	G:G	T:T	C:C	G:G	G:G	A:A	G:G	G:G	T:C	T:C	T:T	G:G	A:A	A:A	C:C	T:T	G:G	C:T	A:G	A:A	A:A	A:A	G:A	G:G	T:T	T:T	C:C	T:T	G:G	C:A	A:A	T:C	G:G	T:T	T:C	A:T	C:T	G:G	T:T	A:A	A:A	G:G	T:C	A:C
908	HR_9_835	2019_1st	train set	case	case	G:G	T:T	C:C	G:G	G:G	A:A	G:G	G:G	T:C	T:C	T:T	G:G	A:A	A:A	C:C	T:T	G:G	C:T	A:G	A:A	A:A	A:A	G:A	G:G	C:T	T:T	C:C	T:T	G:G	C:A	A:A	T:T	G:G	A:A	T:C	A:T	C:C	G:T	T:T	G:G	A:A	G:G	T:C	C:C
909	HR_9_827	2019_1st	train set	case	case	G:G	T:T	C:C	G:G	G:G	A:A	G:G	G:G	T:T	T:C	T:T	G:G	A:A	A:A	C:C	T:T	G:G	T:T	G:G	A:A	A:A	A:A	G:A	G:A	C:T	T:T	C:C	T:T	G:G	C:C	A:A	T:C	G:G	T:T	T:C	A:A	C:T	G:G	T:T	G:A	A:G	G:G	T:C	C:C
910	HR_9_774	2019_1st	train set	case	case	G:G	T:T	C:T	G:G	G:G	A:A	G:G	G:G	T:C	T:C	T:T	G:G	A:A	A:G	C:C	T:T	G:G	C:T	A:G	A:A	A:A	A:G	G:A	G:G	C:T	T:T	C:C	T:T	G:G	C:A	A:G	T:T	G:G	A:A	T:C	A:T	C:C	G:G	T:T	G:G	A:G	G:G	T:C	A:A
911	HR_9_819	2019_1st	train set	case	case	G:G	T:T	C:C	G:G	G:G	A:A	G:G	G:G	T:C	T:C	T:T	G:G	A:G	A:A	C:C	T:T	G:G	T:T	G:G	A:A	A:A	A:A	G:A	G:A	C:T	T:T	C:C	T:T	G:G	C:A	A:A	T:C	G:G	A:A	T:C	A:A	C:T	G:G	T:T	G:A	A:A	G:G	T:C	A:A
912	HR_9_861	2019_1st	train set	case	case	G:G	T:T	C:C	G:G	G:G	A:A	G:G	G:G	T:C	T:C	T:T	G:G	A:A	A:A	C:C	T:T	G:G	C:T	A:G	A:A	A:A	A:A	G:A	G:G	C:C	T:A	C:C	T:T	G:G	C:A	A:G	T:C	G:G	A:A	T:C	A:T	C:T	G:G	T:T	G:G	A:G	G:G	T:C	C:C
913	HR_9_853	2019_1st	train set	case	case	G:G	T:T	C:C	G:G	G:G	A:A	G:G	G:G	T:C	T:C	T:T	G:G	A:A	A:A	C:C	T:T	G:G	C:T	A:G	A:A	A:A	A:A	G:A	G:G	C:C	T:T	C:C	T:T	G:G	C:C	A:G	T:C	G:G	A:A	T:C	T:T	C:T	G:G	T:T	G:G	A:A	G:A	T:C	A:A
914	HR_9_804	2019_1st	train set	case	case	G:G	T:T	C:C	G:G	G:G	A:A	G:G	G:G	T:C	T:C	T:T	G:G	A:A	A:A	C:C	T:T	G:G	C:T	A:G	A:A	A:A	A:A	G:A	G:G	T:T	T:T	C:C	T:T	G:G	C:C	A:A	T:T	G:G	A:A	T:C	A:A	C:C	G:G	T:T	G:G	A:A	G:G	T:C	A:C
915	HR_9_845	2019_1st	train set	case	case	G:G	T:T	C:T	G:G	G:G	A:A	G:G	G:G	T:C	T:C	T:T	G:G	A:A	G:G	C:C	T:T	G:G	C:T	A:G	A:A	A:A	A:G	G:A	G:G	C:T	T:T	C:C	T:T	G:G	C:C	A:A	T:T	G:G	A:A	T:C	T:T	C:C	G:G	T:T	G:G	A:A	G:A	T:C	A:C
916	HR_9_796	2019_1st	train set	case	case	G:G	T:T	C:T	G:G	G:G	A:A	G:G	G:G	T:C	T:C	T:T	G:G	A:A	A:A	C:C	T:T	G:G	C:T	A:G	A:A	A:A	A:A	G:A	G:G	C:T	T:T	C:C	T:T	G:G	C:C	A:A	T:C	G:G	A:A	T:C	T:T	C:T	G:G	T:T	G:G	A:G	G:A	T:C	A:C
917	HR_9_837	2019_1st	train set	case	case	G:G	T:T	C:C	G:G	G:G	A:A	G:G	G:G	T:C	T:C	T:T	G:G	A:A	A:A	C:C	T:T	G:G	C:T	A:G	A:A	A:A	A:A	G:A	G:G	C:T	T:T	C:C	T:T	G:G	C:A	A:A	T:T	G:G	T:T	T:C	A:A	C:C	G:G	T:T	A:A	A:A	G:G	T:C	A:C
918	HR_9_829	2019_1st	train set	case	case	G:G	T:T	C:C	G:G	G:G	A:A	G:G	G:G	T:T	T:C	T:T	G:G	A:A	A:A	C:C	T:T	G:G	C:T	A:G	A:A	A:A	A:G	G:A	G:G	T:T	T:T	C:C	T:T	G:A	C:C	A:A	T:T	G:G	A:A	T:C	A:A	C:C	G:T	T:T	G:G	A:A	G:G	T:C	C:C
919	HR_9_780	2019_1st	train set	case	case	G:G	T:T	C:T	G:G	G:G	A:A	G:G	G:G	T:C	T:C	T:T	G:G	A:A	A:A	C:C	T:T	G:G	C:T	A:G	A:A	A:A	A:A	G:A	G:G	C:T	T:A	C:C	T:T	G:G	C:C	A:A	T:T	G:G	A:A	T:C	T:T	C:C	G:G	T:T	G:G	A:G	G:G	T:C	A:A
920	HR_9_821	2019_1st	train set	case	case	G:G	T:T	C:C	G:G	G:G	A:A	G:G	G:G	T:C	T:C	T:T	G:G	A:A	A:A	C:C	T:T	G:G	C:T	A:G	A:A	A:A	A:A	G:A	G:G	C:T	T:T	C:C	T:T	G:G	C:A	A:A	T:C	G:G	T:T	T:C	A:T	C:T	G:T	T:T	A:A	A:A	G:G	T:C	A:C
921	HR_9_813	2019_1st	train set	case	case	G:G	T:T	C:C	G:G	G:G	A:A	G:G	G:G	T:C	T:C	T:T	G:G	A:A	A:G	C:C	T:T	G:G	C:T	A:G	A:A	A:A	A:A	G:A	G:G	C:C	T:T	C:C	T:T	G:G	C:A	A:G	T:C	G:G	A:A	T:C	A:T	C:T	G:G	T:T	G:G	A:A	G:A	T:C	A:A
922	HR_9_860	2019_1st	train set	case	case	G:G	T:T	C:C	G:G	G:G	A:A	G:G	G:G	T:T	T:C	T:T	G:G	A:A	A:A	C:C	T:T	G:G	C:T	A:G	A:A	A:A	A:A	G:A	G:G	C:T	T:T	C:C	T:T	G:A	C:A	A:A	T:C	G:G	A:A	T:C	A:A	C:T	G:G	T:T	G:G	A:A	G:G	T:C	A:A
923	HR_9_852	2019_1st	train set	case	case	G:G	T:T	C:C	G:G	G:G	A:A	G:G	G:G	T:C	T:C	T:T	G:G	A:A	A:A	C:C	T:T	G:G	C:T	A:G	A:A	A:A	A:A	G:A	G:G	C:C	T:A	C:C	T:T	G:G	C:C	A:A	T:C	G:G	A:A	T:C	T:T	C:T	G:G	T:T	G:G	A:A	G:G	T:C	A:C
924	HR_9_797	2019_1st	test set	case	case	G:G	T:T	C:C	G:G	G:G	A:A	G:G	G:G	T:T	T:C	T:T	G:G	A:A	A:A	C:C	T:T	G:G	C:T	A:G	A:A	A:A	A:G	G:A	G:G	C:T	T:T	C:C	T:T	G:G	C:C	A:A	T:T	G:G	A:A	T:C	A:A	C:C	G:G	T:T	G:G	A:A	G:A	T:C	A:C
925	HR_9_844	2019_1st	train set	case	case	G:G	T:T	C:C	G:G	G:G	A:A	G:G	G:G	T:C	T:C	T:C	G:G	A:A	A:A	C:C	T:T	G:G	C:T	A:G	A:A	A:A	A:A	G:A	G:A	C:C	T:T	C:C	T:T	G:G	C:C	A:A	T:C	G:G	A:A	T:C	A:A	C:T	G:G	T:T	G:G	A:A	G:G	T:C	A:A
926	HR_9_789	2019_1st	train set	case	case	No Call	T:T	C:C	G:G	G:G	A:A	G:G	G:T	T:T	T:C	T:T	G:G	A:A	A:A	C:C	T:T	G:G	C:T	A:G	A:A	A:A	A:A	G:A	G:G	C:C	T:T	C:C	T:T	G:G	C:C	A:A	T:C	G:G	T:T	T:C	A:A	C:T	G:G	T:T	G:A	A:G	G:G	T:C	C:C
927	HR_9_836	2019_1st	train set	case	case	G:G	T:T	C:C	G:G	G:G	A:A	G:G	G:G	T:C	T:C	T:T	G:G	A:A	A:A	C:C	T:T	G:G	C:T	A:G	A:A	A:A	A:A	G:A	G:G	C:T	T:T	C:C	T:T	G:G	C:C	A:A	T:T	G:G	A:A	T:C	A:A	C:C	G:G	T:T	G:G	A:A	G:G	T:C	A:C
928	HR_9_781	2019_1st	train set	case	case	G:G	T:T	C:C	G:G	G:G	A:A	G:G	G:T	T:C	T:C	T:T	G:G	A:G	A:A	C:C	T:T	G:G	C:T	A:G	A:A	A:A	A:A	G:A	G:G	C:C	T:T	C:C	T:T	G:G	C:C	A:A	T:C	G:G	T:A	T:C	A:A	C:T	G:G	T:T	G:G	A:A	G:G	T:C	A:C
929	HR_9_773	2019_1st	train set	case	case	G:G	T:T	C:C	G:G	G:G	A:A	G:G	G:G	T:T	T:C	T:T	G:G	A:A	A:A	C:T	T:T	G:G	C:T	A:G	A:A	A:A	A:G	G:A	G:G	T:T	T:T	C:C	T:T	G:G	C:C	A:A	T:C	G:G	T:T	T:C	A:A	C:T	G:G	T:T	A:A	A:A	G:A	T:C	A:A
930	HR_9_820	2019_1st	train set	case	case	G:G	T:T	C:C	G:G	G:G	A:A	G:G	G:G	T:T	T:C	T:T	G:G	A:A	A:A	C:C	T:T	G:G	C:T	A:G	A:A	A:A	A:A	G:A	G:G	C:T	T:T	C:C	T:T	G:A	C:A	A:A	T:C	G:G	T:T	T:C	A:A	C:T	G:T	T:T	G:G	A:A	G:G	T:C	A:C
931	HR_10_960	2019_1st	train set	case	case	G:G	T:T	C:C	G:G	G:G	A:A	G:G	G:G	T:C	T:C	C:C	G:G	A:A	A:A	C:T	T:T	G:G	C:C	A:G	A:A	A:A	A:A	G:A	G:A	C:T	T:T	C:C	T:T	G:G	C:C	A:A	T:C	G:G	T:T	T:C	A:A	C:T	G:G	T:T	G:G	A:A	G:G	T:C	A:C
932	HR_10_905	2019_1st	train set	case	case	G:G	T:T	C:C	G:G	G:G	A:A	G:G	G:T	T:C	T:C	T:C	G:G	A:A	A:A	C:C	T:T	G:G	C:C	A:G	A:A	A:A	A:A	G:A	G:G	C:C	T:T	C:C	T:T	G:G	C:A	A:A	T:C	G:G	T:A	T:C	A:A	C:T	G:G	T:T	G:G	A:A	G:G	T:C	A:A
933	HR_10_952	2019_1st	train set	case	case	G:G	T:T	C:C	G:G	G:G	A:A	G:G	G:G	T:T	T:C	T:C	G:G	A:A	A:A	C:C	T:T	G:G	C:C	A:G	A:A	A:A	A:A	G:A	G:A	C:C	T:T	C:C	T:T	G:G	C:A	A:A	T:C	G:G	A:A	T:C	A:A	C:T	G:G	T:T	G:G	A:G	G:G	T:C	A:A
934	HR_10_897	2019_1st	train set	case	case	G:G	T:T	C:T	G:G	G:G	A:A	G:G	G:G	T:C	T:C	T:T	G:G	A:A	A:A	C:C	T:T	G:G	C:C	A:G	A:A	A:A	A:A	G:A	G:G	C:T	T:T	C:C	T:T	G:G	C:A	A:A	T:T	G:G	A:A	T:C	A:T	C:C	G:G	T:T	G:G	A:G	G:G	T:C	A:A
935	HR_10_944	2019_1st	train set	case	case	G:G	T:T	C:C	G:G	G:G	A:A	G:G	G:G	T:C	T:C	C:C	G:G	A:A	A:A	C:T	T:T	G:G	C:C	A:G	A:A	A:A	A:A	G:A	G:A	C:T	T:T	C:C	T:T	G:G	C:A	A:A	T:C	G:G	T:A	T:C	A:A	C:T	G:G	T:T	G:A	A:G	G:G	T:C	C:C
936	HR_10_936	2019_1st	train set	case	case	G:G	T:T	C:C	G:G	G:G	A:A	G:G	G:G	T:C	T:C	T:C	G:G	A:A	A:A	C:T	T:T	G:G	C:C	A:G	A:A	A:A	A:A	G:A	G:G	C:T	T:T	C:C	T:T	G:G	C:A	A:A	T:C	G:G	T:T	T:C	A:T	C:T	G:G	T:T	A:A	A:A	G:G	T:C	A:C
937	HR_10_881	2019_1st	train set	case	case	G:G	T:T	C:C	G:G	G:G	A:A	G:G	G:G	T:C	T:C	T:T	G:G	A:A	A:A	T:T	T:T	G:G	C:C	A:G	A:A	A:A	A:G	G:A	G:G	C:T	T:T	C:C	T:T	G:G	C:C	A:A	T:T	G:G	A:A	T:C	A:A	C:C	G:G	T:T	G:G	A:G	G:A	T:C	A:C
938	HR_10_928	2019_1st	train set	case	case	G:G	T:T	C:C	G:G	G:G	A:A	G:G	G:G	T:T	T:C	T:C	G:G	A:A	A:A	C:T	T:T	G:G	C:C	A:G	A:A	A:A	A:A	G:A	G:G	C:T	T:T	C:C	T:T	G:G	C:A	A:A	T:C	G:G	T:A	T:C	A:T	C:T	G:G	T:T	A:A	A:A	G:A	T:C	A:C
939	HR_10_873	2019_1st	train set	case	case	G:G	T:T	C:C	G:G	G:G	A:A	G:G	G:G	T:C	T:C	T:C	G:G	A:G	A:A	C:C	T:T	G:G	C:C	A:G	A:A	A:A	A:A	G:A	G:A	C:C	T:T	C:C	T:T	G:G	C:A	A:A	T:C	G:G	A:A	T:C	A:A	C:T	G:G	T:T	G:A	A:A	G:G	T:C	A:C
940	HR_10_920	2019_1st	train set	case	case	No Call	T:T	C:C	G:G	G:G	A:A	G:G	G:G	T:T	T:C	T:T	G:G	A:A	A:A	T:T	T:T	G:G	C:C	A:G	A:A	A:A	A:G	G:A	G:G	C:T	T:T	C:C	T:T	G:A	C:C	A:A	T:C	G:G	T:T	T:C	A:T	C:T	G:T	T:T	G:G	A:A	G:A	T:C	C:C
941	HR_10_912	2019_1st	train set	case	case	G:G	T:T	C:C	G:G	G:G	A:A	G:G	G:G	T:C	T:C	T:C	G:G	A:A	A:A	C:C	T:T	G:G	C:C	A:G	A:A	A:A	A:G	G:A	G:G	C:C	T:A	C:C	T:T	G:G	C:C	A:A	T:T	G:G	A:A	T:C	T:T	C:C	G:G	T:T	G:G	A:A	G:G	T:C	A:C
942	HR_10_953	2019_1st	train set	case	case	G:G	T:T	C:C	G:G	G:G	A:A	G:G	G:G	T:C	T:C	T:C	G:G	A:A	A:A	C:T	T:T	G:G	C:C	A:G	A:A	A:A	A:G	G:A	G:A	T:T	T:A	C:C	T:T	G:A	C:C	A:A	T:T	G:G	T:T	T:C	T:T	C:C	G:G	T:T	G:G	A:A	G:G	T:C	A:C
943	HR_10_904	2019_1st	train set	case	case	G:G	T:T	C:C	G:G	G:G	A:A	G:G	G:G	T:C	T:C	T:T	G:G	A:A	A:A	C:T	T:T	G:G	C:C	A:G	A:A	A:A	A:A	G:A	G:A	C:C	T:T	C:C	T:T	G:G	C:A	A:A	T:C	G:G	T:T	T:C	A:A	C:T	G:G	T:T	G:G	A:A	G:G	T:C	A:A
944	HR_10_896	2019_1st	train set	case	case	G:G	T:T	C:C	G:C	G:G	A:A	G:G	G:T	T:C	T:C	T:C	G:G	A:A	A:A	C:C	T:T	G:G	C:C	A:G	A:A	A:A	A:A	G:A	G:G	C:T	T:T	C:C	T:T	G:G	C:C	A:A	T:C	G:G	A:A	T:C	A:T	C:C	G:G	T:G	A:A	A:G	G:G	T:C	A:C
945	HR_10_937	2019_1st	train set	case	case	G:G	T:T	C:C	C:C	G:G	A:A	G:G	G:T	T:C	T:C	T:C	G:G	A:G	A:A	C:C	T:T	G:G	C:C	A:G	A:A	A:A	A:A	G:A	G:G	C:T	T:T	C:C	T:T	G:G	C:C	A:A	T:C	G:G	A:A	T:C	A:T	C:C	G:G	T:T	A:A	A:A	G:A	T:C	A:C
946	HR_10_888	2019_1st	train set	case	case	G:G	T:T	C:C	G:G	G:G	A:A	G:G	G:G	T:C	T:C	T:T	G:G	A:G	A:A	C:C	T:T	G:G	C:C	A:G	A:A	A:A	A:A	G:A	G:A	C:C	T:T	C:C	T:T	G:G	C:A	A:A	T:C	G:G	T:A	T:C	A:A	C:T	G:G	T:T	G:A	A:A	G:G	T:C	A:C
947	HR_10_929	2019_1st	test set	case	case	G:G	T:T	C:C	G:G	G:G	A:A	G:G	G:G	T:C	T:C	C:C	G:G	A:A	A:A	C:C	T:T	G:G	C:C	A:G	A:A	A:A	A:A	G:A	G:A	C:C	T:T	C:C	T:T	G:G	C:C	A:A	T:C	G:G	T:T	T:C	A:A	C:T	G:G	T:T	G:G	A:A	G:G	T:C	A:C
948	HR_10_880	2019_1st	train set	case	case	G:G	T:T	C:T	G:G	G:G	A:A	G:G	G:G	T:C	T:C	T:C	G:G	A:A	A:A	C:C	T:T	G:G	C:C	A:G	A:A	A:A	A:G	G:A	G:G	C:T	T:T	C:C	T:T	G:G	C:A	A:A	T:T	G:G	T:A	T:C	A:T	C:C	G:G	T:T	G:G	A:A	G:G	T:C	A:C
949	HR_10_921	2019_1st	train set	case	case	G:G	T:T	C:T	G:G	G:G	A:A	G:G	G:G	T:C	T:C	T:T	G:G	A:A	A:A	C:C	T:T	G:G	C:C	A:G	A:A	A:A	A:G	G:A	G:G	C:T	T:A	C:C	T:T	G:G	C:A	A:A	T:T	G:G	A:A	T:C	A:T	C:C	G:G	T:T	G:G	A:A	G:G	T:C	A:A
950	HR_10_872	2019_1st	train set	case	case	G:G	T:T	C:T	G:G	G:G	A:A	G:G	G:G	T:C	T:C	T:C	G:G	A:A	A:A	C:C	T:T	G:G	C:C	A:G	A:A	A:A	A:A	G:A	G:G	C:C	T:A	C:C	T:T	G:G	C:C	A:A	T:T	G:G	A:A	T:C	A:T	C:C	G:G	T:T	G:G	A:A	G:A	T:C	C:C
951	HR_10_913	2019_1st	train set	case	case	G:G	T:T	C:C	G:G	G:G	A:A	G:G	G:G	T:C	T:C	T:T	G:G	A:A	A:G	C:C	T:T	G:G	C:C	A:G	A:A	A:A	A:A	G:A	G:G	C:C	T:A	C:C	T:T	G:G	C:A	A:G	T:C	G:G	A:A	T:C	A:T	C:T	G:G	T:T	G:G	A:G	G:G	T:C	A:A
952	HR_10_959	2019_1st	train set	case	case	G:G	T:T	C:C	G:G	G:G	A:A	G:G	G:G	T:C	T:C	T:C	G:G	A:A	A:A	C:C	T:T	G:G	C:C	A:G	A:A	A:A	A:G	G:A	G:G	C:C	T:A	C:C	T:T	G:G	C:C	A:A	T:T	G:G	T:A	T:C	T:T	C:C	G:G	T:T	G:G	A:A	G:A	T:C	A:C
953	HR_10_906	2019_1st	train set	case	case	G:G	T:T	C:C	G:G	G:G	A:A	G:G	G:T	T:T	T:C	C:C	G:G	A:A	A:A	C:C	T:T	G:G	C:C	A:G	A:A	A:A	A:A	G:A	G:G	C:T	T:T	C:C	T:T	G:G	C:C	A:A	T:C	G:G	A:A	T:C	A:A	C:T	G:G	T:T	G:A	A:G	G:G	T:C	C:C
954	HR_10_951	2019_1st	train set	case	case	G:G	T:T	C:C	G:G	G:G	A:A	G:G	G:G	T:C	T:C	T:C	G:G	A:A	A:A	C:C	T:T	G:G	C:C	A:G	A:A	A:A	A:G	G:A	G:G	C:C	T:A	C:C	T:T	G:G	C:C	A:G	T:T	G:G	A:A	T:C	T:T	C:C	G:G	T:T	G:G	A:A	G:A	T:C	C:C
955	HR_10_898	2019_1st	train set	case	case	G:G	T:T	C:C	G:G	G:G	A:A	G:G	G:T	T:T	T:C	C:C	G:G	A:G	A:A	C:C	T:T	G:G	C:C	A:G	A:A	A:A	A:A	G:A	G:G	C:T	T:T	C:C	T:T	G:G	C:A	A:A	T:C	G:G	T:T	T:C	A:A	C:T	G:G	T:T	G:G	A:G	G:G	T:C	A:C
956	HR_10_943	2019_1st	train set	case	case	G:G	T:T	C:C	G:G	G:G	A:A	G:G	G:G	T:C	T:C	T:C	G:G	A:A	G:G	C:C	T:T	G:G	C:C	A:G	A:A	A:A	A:A	G:A	G:G	C:C	T:A	C:C	T:T	G:G	C:C	A:G	T:C	G:G	A:A	T:C	T:T	C:T	G:G	T:T	G:G	A:G	G:A	T:C	C:C
957	HR_10_890	2019_1st	test set	case	case	No Call	T:T	C:C	G:G	G:G	A:A	G:G	G:T	T:C	T:C	T:C	G:G	A:G	A:A	C:C	T:T	G:G	C:C	A:G	A:A	A:A	A:A	G:A	G:G	C:T	T:T	C:C	T:T	G:G	C:C	A:A	T:C	G:G	T:A	T:C	A:A	C:T	G:G	T:T	G:A	A:A	G:G	T:C	C:C
958	HR_10_935	2019_1st	train set	case	case	G:G	T:T	C:C	G:G	G:G	A:A	G:G	G:T	T:C	T:C	T:C	G:G	A:A	A:A	C:C	T:T	G:G	C:T	G:G	A:A	A:A	A:A	G:A	G:G	C:T	T:T	C:C	T:T	G:G	C:C	A:A	T:C	G:G	T:A	T:C	A:A	C:T	G:G	T:T	G:A	A:A	G:G	T:C	C:C
959	HR_10_882	2019_1st	test set	case	case	G:G	T:T	C:T	G:G	G:G	A:A	G:G	G:G	T:C	T:C	T:T	G:G	A:A	A:A	C:C	T:T	G:G	C:C	A:G	A:A	A:A	A:G	G:A	G:G	C:T	T:A	C:C	T:T	G:G	C:C	A:A	T:T	G:G	A:A	T:C	A:T	C:C	G:G	T:T	G:G	A:A	G:G	T:C	C:C
960	HR_10_919	2019_1st	train set	case	case	G:G	T:T	C:C	G:G	G:G	A:A	G:G	G:G	T:C	T:C	T:T	G:G	A:A	A:A	C:C	T:T	G:G	C:C	A:G	A:A	A:A	A:G	G:A	G:G	C:C	T:T	C:C	T:T	G:G	C:C	A:G	T:T	G:G	T:A	T:C	T:T	C:C	G:G	T:T	G:G	A:G	G:A	T:C	A:C
961	HR_10_911	2019_1st	train set	case	case	G:G	T:T	C:C	G:G	G:G	A:A	G:G	G:T	T:T	T:C	T:C	G:G	A:G	A:A	C:T	T:T	G:G	C:C	A:G	A:A	A:A	A:A	G:A	G:G	C:T	T:T	C:C	T:T	G:G	C:A	A:A	T:C	G:G	T:T	T:C	A:A	C:T	G:G	T:T	G:A	A:G	G:G	T:C	C:C
962	HR_10_903	2019_1st	train set	case	case	G:G	T:T	C:C	G:G	G:G	A:A	G:G	G:G	T:C	T:C	T:T	G:G	A:A	A:G	C:C	T:T	G:G	C:C	A:G	A:A	A:A	A:A	G:A	G:G	C:C	T:A	C:C	T:T	G:G	C:A	A:G	T:C	G:G	T:A	T:C	A:T	C:T	G:G	T:T	G:G	A:G	G:G	T:C	A:A
963	HR_10_895	2019_1st	train set	case	case	G:G	T:T	C:C	G:G	G:G	A:A	G:G	G:G	T:C	T:C	T:C	G:G	A:A	A:A	C:C	T:T	G:G	C:T	G:G	A:A	A:A	A:G	G:A	G:G	T:T	T:T	C:C	T:T	G:G	C:C	A:A	T:T	G:G	T:T	T:C	A:T	C:C	G:G	T:T	G:G	A:A	G:G	T:C	A:C
964	HR_10_887	2019_1st	test set	case	case	G:G	T:T	C:C	G:G	G:G	A:A	G:G	G:G	T:C	T:C	C:C	G:G	A:G	A:A	C:C	T:T	G:G	C:C	A:G	A:A	A:A	A:A	G:A	G:A	C:C	T:T	C:C	T:T	G:G	C:A	A:A	T:C	G:G	T:A	T:C	A:A	C:T	G:G	T:T	G:A	A:A	G:G	T:C	A:C
965	HR_10_930	2019_1st	train set	case	case	G:G	T:T	C:T	G:G	G:G	A:A	G:G	G:G	T:C	T:C	T:C	G:G	A:A	A:A	C:C	T:T	G:G	C:C	A:G	A:A	A:A	A:A	G:A	G:G	C:T	T:T	C:C	T:T	G:G	C:A	A:A	T:T	G:G	T:A	T:C	A:T	C:C	G:G	T:T	G:G	A:A	G:A	T:C	C:C
966	HR_10_879	2019_1st	train set	case	case	G:G	T:T	T:T	G:G	G:G	A:A	G:G	G:G	T:C	T:C	T:C	G:G	A:A	A:A	C:C	T:T	G:G	C:C	A:G	A:A	A:A	A:A	G:A	G:G	T:T	T:T	C:C	T:T	G:G	C:C	A:A	T:C	G:G	T:T	T:C	T:T	C:T	G:G	T:T	A:A	A:A	G:G	T:C	A:A
967	HR_10_922	2019_1st	test set	case	case	G:G	T:T	C:C	G:G	G:G	A:A	G:G	G:G	T:C	T:C	T:C	G:G	A:A	A:A	C:C	T:T	G:G	T:T	G:G	A:A	A:A	A:A	G:A	G:A	C:T	T:T	C:C	T:T	G:G	C:A	A:A	T:C	G:G	A:A	T:C	A:A	C:T	G:G	T:T	G:G	A:A	G:G	T:C	A:C
968	HR_10_914	2019_1st	train set	case	case	G:G	T:T	C:C	G:G	G:G	A:A	G:G	G:G	T:C	T:C	T:T	G:G	A:G	A:A	C:C	T:T	G:G	C:C	A:G	A:A	A:A	A:A	G:A	G:A	C:C	T:T	C:C	T:T	G:G	C:A	A:A	T:C	G:G	T:T	T:C	A:A	C:T	G:G	T:T	G:G	A:A	G:G	T:C	A:C
969	HR_10_958	2019_1st	train set	case	case	G:G	T:T	C:C	G:G	G:G	A:A	G:G	G:G	T:C	T:C	T:C	G:G	A:A	A:G	C:C	T:T	G:G	C:C	A:G	A:A	A:A	A:A	G:A	G:G	C:C	T:T	C:C	T:T	G:G	C:A	A:G	T:C	G:G	T:A	T:C	A:T	C:T	G:G	T:T	G:G	A:G	G:A	T:C	A:A
970	HR_10_950	2019_1st	test set	case	case	G:G	T:T	C:C	G:G	G:G	A:A	G:G	G:G	T:C	T:C	T:C	G:G	A:A	A:A	C:C	T:T	G:G	C:C	A:G	A:A	A:A	A:A	G:A	G:G	T:T	T:T	C:C	T:T	G:A	C:A	A:A	T:T	G:G	A:A	T:C	A:A	C:C	G:T	T:T	A:A	A:A	G:G	T:C	C:C
971	HR_10_942	2019_1st	train set	case	case	G:G	T:T	C:C	G:G	G:G	A:A	G:G	G:G	T:C	T:C	C:C	G:G	A:G	A:A	C:C	T:T	G:G	C:T	G:G	A:A	A:A	A:A	G:A	G:A	C:T	T:T	C:C	T:T	G:G	C:C	A:A	T:C	G:G	T:A	T:C	A:A	C:T	G:G	T:T	G:A	A:G	G:G	T:C	A:C
972	HR_10_891	2019_1st	train set	case	case	G:G	T:T	C:C	G:G	G:G	A:A	G:G	G:G	T:C	T:C	T:C	G:G	A:A	A:A	C:T	T:T	G:G	C:C	A:G	A:A	A:A	A:A	G:A	G:G	C:T	T:T	C:C	T:T	G:G	C:A	A:A	T:C	G:G	T:T	T:C	A:T	C:T	G:T	T:T	A:A	A:A	G:G	T:C	A:C
973	HR_10_934	2019_1st	train set	case	case	G:G	T:T	T:T	G:G	G:G	A:A	G:G	G:G	T:C	T:C	T:C	G:G	A:A	A:A	C:C	T:T	G:G	C:C	A:G	A:A	A:A	G:G	G:A	G:G	T:T	T:T	C:C	T:T	G:G	C:A	A:A	T:T	G:G	T:T	T:C	A:T	C:C	G:G	T:T	G:G	A:G	G:G	T:C	A:C
974	HR_10_883	2019_1st	train set	case	case	G:G	T:T	C:C	G:G	G:G	A:A	G:G	G:T	T:C	T:C	C:C	G:G	A:G	A:A	C:T	T:T	G:G	C:C	A:G	A:A	A:A	A:A	G:A	G:G	C:C	T:T	C:C	T:T	G:G	C:C	A:A	T:C	G:G	T:T	T:C	A:A	C:T	G:G	T:T	G:G	A:G	G:G	T:C	A:C
975	HR_10_875	2019_1st	train set	case	case	No Call	T:T	C:C	C:C	G:G	A:A	G:G	G:T	T:C	T:C	T:C	G:G	A:G	A:A	C:C	T:T	G:G	C:C	A:G	A:A	A:A	A:A	G:A	G:G	C:T	T:T	C:C	T:T	G:G	C:C	A:A	T:C	G:G	A:A	T:C	A:A	C:C	G:G	T:G	A:A	A:A	G:A	T:C	C:C
976	HR_10_918	2019_1st	train set	case	case	G:G	T:T	C:C	G:G	G:G	A:A	G:G	G:G	T:C	T:C	T:T	G:G	A:A	A:A	C:C	T:T	G:G	C:C	A:G	A:A	A:A	A:A	G:A	G:G	C:T	T:T	C:C	T:T	G:G	C:C	A:A	T:C	G:G	T:T	T:C	A:T	C:T	G:G	T:T	G:G	A:A	G:G	T:C	A:A
977	HR_10_867	2019_1st	train set	case	case	G:G	T:T	C:C	G:G	G:G	A:A	G:G	G:G	T:C	T:C	T:C	G:G	A:A	A:A	C:T	T:T	G:G	C:C	A:G	A:A	A:A	A:A	G:A	G:A	C:C	T:T	C:C	T:T	G:G	C:A	A:A	T:C	G:G	T:A	T:C	A:A	C:T	G:G	T:T	G:A	A:A	G:G	T:C	A:A
978	HR_10_910	2019_1st	train set	case	case	G:G	T:T	C:C	G:G	G:G	A:A	G:G	G:G	T:T	T:C	T:C	G:G	A:A	A:A	C:T	T:T	G:G	C:T	G:G	A:A	A:A	G:G	G:A	G:G	T:T	T:T	C:C	T:T	G:G	C:C	A:A	T:T	G:G	T:T	T:C	A:T	C:C	G:G	T:T	G:A	A:G	G:A	T:C	A:A
979	HR_10_955	2019_1st	train set	case	case	G:G	T:T	C:C	G:G	G:G	A:A	G:G	G:T	T:C	T:C	T:C	G:G	A:A	A:A	C:C	T:T	G:G	C:C	A:G	A:A	A:A	A:A	G:A	G:G	C:C	T:T	C:C	T:T	G:G	C:C	A:A	T:C	G:G	T:T	T:C	A:A	C:T	G:G	T:T	G:A	A:A	G:G	T:C	A:A
980	HR_10_902	2019_1st	train set	case	case	G:G	T:T	C:C	G:G	G:G	A:A	G:G	G:G	T:C	T:C	T:T	G:G	A:A	G:G	C:C	T:T	G:G	C:C	A:G	A:A	A:A	A:G	G:A	G:G	C:C	T:T	C:C	T:T	G:G	C:C	A:G	T:T	G:G	A:A	T:C	T:T	C:C	G:G	T:T	G:G	A:G	G:A	T:C	A:C
981	HR_10_894	2019_1st	train set	case	case	G:G	T:T	C:C	G:G	G:G	A:A	G:G	G:G	T:C	T:C	T:C	G:G	A:A	G:G	C:C	T:T	G:G	C:C	A:G	A:A	A:A	A:A	G:A	G:G	C:C	T:T	C:C	T:T	G:G	C:C	A:G	T:C	G:G	A:A	T:C	T:T	C:T	G:G	T:T	G:G	A:A	G:A	T:C	C:C
982	HR_10_939	2019_1st	train set	case	case	G:G	T:T	C:C	G:G	G:G	A:A	G:G	G:G	T:C	T:C	T:C	G:G	A:A	A:A	C:C	T:T	G:G	C:C	A:G	A:A	A:A	A:A	G:A	G:A	C:C	T:T	C:C	T:T	G:G	C:C	A:A	T:C	G:G	T:T	T:C	A:A	C:T	G:G	T:T	G:A	A:A	G:G	T:C	A:C
983	HR_10_886	2019_1st	train set	case	case	G:G	T:T	C:C	G:G	G:G	A:A	G:G	G:G	T:C	T:C	T:T	G:G	A:G	A:A	C:C	T:T	G:G	T:T	G:G	A:A	A:A	A:A	G:A	G:A	C:T	T:T	C:C	T:T	G:G	C:A	A:A	T:C	G:G	T:A	T:C	A:A	C:T	G:G	T:T	G:A	A:A	G:G	T:C	C:C
984	HR_10_878	2019_1st	train set	case	case	G:G	T:T	C:C	G:G	G:G	A:A	G:G	G:G	T:C	T:C	T:C	G:G	A:G	A:A	C:T	T:T	G:G	T:T	G:G	A:A	A:A	A:A	G:A	G:A	C:T	T:T	C:C	T:T	G:G	C:C	A:A	T:C	G:G	T:A	T:C	A:A	C:T	G:G	T:T	G:G	A:A	G:G	T:C	A:C
985	HR_10_923	2019_1st	test set	case	case	G:G	T:T	C:C	G:G	G:G	A:A	G:G	G:G	T:C	T:C	T:C	G:G	A:A	A:G	C:C	T:T	G:G	C:C	A:G	A:A	A:A	A:A	G:A	G:G	C:C	T:A	C:C	T:T	G:G	C:A	A:G	T:C	G:G	A:A	T:C	A:T	C:T	G:G	T:T	G:G	A:A	G:A	T:C	A:C
986	HR_10_870	2019_1st	train set	case	case	G:G	T:T	C:T	G:G	G:G	A:A	G:G	G:G	T:C	T:C	T:C	G:G	A:A	A:A	C:C	T:T	G:G	C:C	A:G	A:A	A:A	A:A	G:A	G:G	C:T	T:T	C:C	T:T	G:G	C:C	A:G	T:C	G:G	T:A	T:C	T:T	C:T	G:G	T:T	G:G	A:G	G:A	T:C	C:C
987	HR_10_915	2019_1st	train set	case	case	G:G	T:T	C:C	G:G	G:G	A:A	G:G	G:G	T:C	T:C	T:C	G:G	A:G	A:A	C:T	T:T	G:G	C:C	A:G	A:A	A:A	A:A	G:A	G:A	C:T	T:T	C:C	T:T	G:G	C:C	A:A	T:C	G:G	A:A	T:C	A:A	C:T	G:G	T:T	G:G	A:A	G:G	T:C	A:C
988	HR_10_957	2019_1st	train set	case	case	G:G	T:T	C:C	G:G	G:G	A:A	G:G	G:G	T:T	T:C	T:C	G:G	A:A	A:A	C:T	T:T	G:G	T:T	G:G	A:A	A:A	A:G	G:A	G:G	T:T	T:T	C:C	T:T	G:A	C:A	A:A	T:T	G:G	T:T	T:C	A:T	C:C	G:T	T:T	G:G	A:A	G:A	T:C	A:C
989	HR_10_908	2019_1st	train set	case	case	G:G	T:T	C:C	G:G	G:G	A:A	G:G	G:G	T:C	T:C	T:C	G:G	A:A	A:A	C:C	T:T	G:G	C:C	A:G	A:A	A:A	A:A	G:A	G:G	C:T	T:T	C:C	T:T	G:G	C:A	A:A	T:C	G:G	T:T	T:C	A:A	C:T	G:G	T:T	A:A	A:G	G:G	T:C	A:C
990	HR_10_949	2019_1st	train set	case	case	G:G	T:T	C:C	G:G	G:G	A:A	G:G	G:G	T:C	T:C	T:C	G:G	A:A	A:A	C:C	T:T	G:G	C:C	A:G	A:A	A:A	A:G	G:A	G:G	C:C	T:A	C:C	T:T	G:G	C:A	A:G	T:C	G:G	T:A	T:C	A:T	C:T	G:G	T:T	G:G	A:A	G:A	T:C	A:A
991	HR_10_900	2019_1st	train set	case	case	G:G	T:T	C:C	G:G	G:G	A:A	G:G	G:G	T:T	T:C	T:C	G:G	A:A	A:A	C:T	T:T	G:G	C:C	A:G	A:A	A:A	A:G	G:A	G:G	C:T	T:T	C:C	T:T	G:G	C:A	A:A	T:C	G:G	A:A	T:C	A:T	C:T	G:T	T:T	G:G	A:A	G:A	T:C	C:C
992	HR_10_941	2019_1st	train set	case	case	G:G	T:T	C:C	G:G	G:G	A:A	G:G	G:G	T:C	T:C	T:C	G:G	A:A	A:A	C:C	T:T	G:G	C:C	A:G	A:A	A:A	A:A	G:A	G:A	C:C	T:T	C:C	T:T	G:G	C:C	A:A	T:C	G:G	T:A	T:C	A:A	C:T	G:G	T:T	G:A	A:G	G:G	T:C	A:C
993	HR_10_933	2019_1st	train set	case	case	G:G	T:T	C:C	G:G	G:G	A:A	G:G	G:T	T:C	T:C	C:C	G:G	A:G	A:A	C:C	T:T	G:G	C:C	A:G	A:A	A:A	A:A	G:A	G:G	C:C	T:T	C:C	T:T	G:G	C:C	A:A	T:C	G:G	A:A	T:C	A:A	C:T	G:G	T:T	G:G	A:A	G:G	T:C	C:C
994	HR_10_884	2019_1st	train set	case	case	G:G	T:T	C:C	G:G	G:G	A:A	G:G	G:G	T:T	T:C	C:C	G:G	A:A	A:A	C:T	T:T	G:G	C:C	A:G	A:A	A:A	A:A	G:A	G:A	C:C	T:T	C:C	T:T	G:G	C:A	A:A	T:C	G:G	T:A	T:C	A:A	C:T	G:G	T:T	G:A	A:G	G:G	T:C	A:C
995	HR_10_925	2019_1st	train set	case	case	G:G	T:T	C:T	G:G	G:G	A:A	G:G	G:G	T:C	T:C	T:C	G:G	A:A	A:A	C:C	T:T	G:G	C:C	A:G	A:A	A:A	A:A	G:A	G:G	C:T	T:A	C:C	T:T	G:G	C:C	A:A	T:C	G:G	A:A	T:C	T:T	C:T	G:G	T:T	G:G	A:G	G:G	T:C	A:C
996	HR_10_917	2019_1st	train set	case	case	G:G	T:T	C:C	G:G	G:G	A:A	G:G	G:T	T:C	T:C	C:C	G:G	A:A	A:A	C:C	T:T	G:G	T:T	G:G	A:A	A:A	A:A	G:A	G:G	C:T	T:T	C:C	T:T	G:G	C:C	A:A	T:C	G:G	T:T	T:C	A:A	C:T	G:G	T:T	G:A	A:A	G:G	T:C	A:C
997	HR_10_909	2019_1st	train set	case	case	G:G	T:T	C:C	G:G	G:G	A:A	G:G	G:G	T:T	T:C	T:C	G:G	A:A	A:A	C:T	T:T	G:G	C:C	A:G	A:A	A:A	A:A	G:A	G:G	C:T	T:T	C:C	T:T	G:G	C:C	A:A	T:T	G:G	A:A	T:C	A:T	C:C	G:G	T:T	A:A	A:A	G:G	T:C	A:C
998	HR_10_956	2019_1st	train set	case	case	G:G	T:T	C:C	G:G	G:G	A:A	G:G	G:G	T:C	T:C	T:C	G:G	A:G	A:A	C:T	T:T	G:G	C:T	G:G	A:A	A:A	A:A	G:A	G:A	C:T	T:T	C:C	T:T	G:G	C:C	A:A	T:C	G:G	T:A	T:C	A:A	C:T	G:G	T:T	G:A	A:G	G:G	T:C	A:C
999	HR_10_948	2019_1st	test set	case	case	G:G	T:T	C:T	G:G	G:G	A:A	G:G	G:G	T:C	T:C	T:C	G:G	A:A	A:G	C:C	T:T	G:G	C:C	A:G	A:A	A:A	A:G	G:A	G:G	C:T	T:T	C:C	T:T	G:G	C:A	A:G	T:T	G:G	T:A	T:C	A:T	C:C	G:G	T:T	G:G	A:G	G:A	T:C	A:A
1000	HR_10_940	2019_1st	test set	case	case	G:G	T:T	C:C	G:G	G:G	A:A	G:G	G:G	T:C	T:C	T:C	G:G	A:A	A:G	C:C	T:T	G:G	C:C	A:G	A:A	A:A	A:G	G:A	G:G	C:C	T:A	C:C	T:T	G:G	C:C	A:G	T:T	G:G	T:A	T:C	A:T	C:C	G:G	T:T	G:G	A:A	G:A	T:C	C:C
1001	HR_10_885	2019_1st	train set	case	case	G:G	T:T	C:C	G:G	G:G	A:A	G:G	G:G	T:C	T:C	T:T	G:G	A:A	A:A	C:C	T:T	G:G	C:C	A:G	A:A	A:A	A:A	G:A	G:G	C:T	T:T	C:C	T:T	G:G	C:C	A:A	T:C	G:G	A:A	T:C	A:A	C:T	G:G	T:T	A:A	A:A	G:G	T:C	A:A
1002	HR_10_877	2019_1st	test set	case	case	G:G	T:T	C:C	G:C	G:G	A:A	G:G	G:T	T:T	T:C	T:C	G:G	A:A	A:A	C:C	T:T	G:G	C:C	A:G	A:A	A:A	A:A	G:A	G:G	C:T	T:T	C:C	T:T	G:G	C:C	A:A	T:C	G:G	A:A	T:C	A:T	C:C	G:G	T:T	A:A	A:G	G:A	T:C	A:C
1003	HR_10_924	2019_1st	train set	case	case	G:G	T:T	C:C	G:G	G:G	A:A	G:G	G:G	T:C	T:C	T:C	G:G	A:A	A:A	C:T	T:T	G:G	C:C	A:G	A:A	A:A	A:A	G:A	G:G	C:T	T:T	C:C	T:T	G:A	C:A	A:A	T:C	G:G	A:A	T:C	A:A	C:T	G:G	T:T	G:G	A:A	G:A	T:C	A:C
1004	HR_10_916	2019_1st	test set	case	case	No Call	T:T	C:C	G:G	G:G	A:A	G:G	G:T	T:C	T:C	T:C	G:G	A:A	A:A	C:T	T:T	G:G	C:C	A:G	A:A	A:A	A:A	G:A	G:G	C:T	T:T	C:C	T:T	G:G	C:A	A:A	T:C	G:G	T:A	T:C	A:A	C:T	G:G	T:T	G:A	A:A	G:G	T:C	C:C
1005	HR_8_12C_RE	2019_1st	test set	case	case	No Call	T:T	C:C	G:G	G:G	A:A	G:G	G:T	T:C	T:C	T:T	G:G	A:G	A:A	C:C	T:T	G:G	C:C	G:G	A:A	A:A	A:A	G:A	G:G	C:T	T:T	C:C	T:T	G:G	C:A	A:A	T:C	G:G	T:A	T:C	A:A	C:T	G:G	T:T	G:A	A:A	G:G	T:C	C:C
1006	HR_11_1048	2019_1st	test set	case	case	No Call	T:T	C:C	G:G	G:G	A:A	G:G	G:G	T:C	T:C	T:C	G:G	A:G	A:A	C:C	T:T	G:G	C:C	A:G	A:A	A:A	A:A	G:A	G:A	C:C	T:T	C:C	T:T	G:G	C:C	A:A	T:C	G:G	T:T	T:C	A:A	C:T	G:G	T:T	G:A	A:A	G:G	T:C	C:C
1007	HR_11_993	2019_1st	train set	case	case	G:G	T:T	C:C	G:G	G:G	A:A	G:G	G:T	T:C	T:C	T:C	G:G	A:G	A:A	C:C	T:T	G:G	C:C	A:G	A:A	A:A	A:A	G:A	G:G	C:C	T:T	C:C	T:T	G:G	C:C	A:A	T:C	G:G	A:A	T:C	A:A	C:T	G:G	T:T	G:G	A:A	G:G	T:C	A:C
1008	HR_11_1040	2019_1st	train set	case	case	No Call	T:T	C:C	G:G	G:G	A:A	G:G	G:G	T:C	T:C	T:T	G:G	A:G	A:A	C:T	T:T	G:G	C:C	A:G	A:A	A:A	A:A	G:A	G:A	C:C	T:T	C:C	T:T	G:G	C:C	A:A	T:C	G:G	A:A	T:C	A:A	C:T	G:G	T:T	G:A	A:A	G:G	T:C	C:C
1009	HR_11_977	2019_1st	test set	case	case	G:G	T:T	C:C	G:G	G:G	A:A	G:G	G:G	T:C	T:C	T:T	G:G	A:A	A:A	C:C	T:T	G:G	C:C	A:G	A:A	A:A	A:G	G:A	G:G	C:T	T:T	C:C	T:T	G:A	C:A	A:A	T:C	G:G	A:A	T:C	A:T	C:T	G:G	T:T	A:A	A:A	G:G	T:C	A:C
1010	HR_11_1024	2019_1st	train set	case	case	G:G	T:T	C:C	G:G	G:G	A:A	G:G	G:G	T:C	T:C	T:T	G:G	A:A	A:A	C:T	T:T	G:G	C:C	A:G	A:A	A:A	A:G	G:A	G:A	T:T	T:A	C:C	T:T	G:A	C:C	A:A	T:T	G:G	T:T	T:C	A:T	C:C	G:G	T:T	G:G	A:A	G:G	T:C	A:C
1011	HR_11_969	2019_1st	train set	case	case	No Call	T:T	C:C	G:G	G:G	A:A	G:G	G:G	T:T	T:C	T:T	G:G	A:A	A:A	C:T	T:T	G:G	C:C	A:G	A:A	A:A	A:G	G:A	G:G	T:T	T:T	C:C	T:T	G:A	C:C	A:A	T:C	G:G	T:T	T:C	A:T	C:T	G:T	T:T	A:A	A:A	G:A	T:C	C:C
1012	HR_11_1016	2019_1st	train set	case	case	G:G	T:T	C:C	G:G	G:G	A:A	G:G	G:G	T:C	T:C	T:T	G:G	A:A	A:A	C:C	T:T	G:G	C:C	A:G	A:A	A:A	A:A	G:A	G:A	C:C	T:T	C:C	T:T	G:G	C:A	A:A	T:C	G:G	T:T	T:C	A:A	C:T	G:G	T:T	G:A	A:A	G:G	T:C	A:C
1013	HR_11_961	2019_1st	train set	case	case	G:G	T:T	C:T	G:G	G:G	A:A	G:G	G:G	T:C	T:C	T:T	G:G	A:A	A:A	C:C	T:T	G:G	C:C	A:G	A:A	A:A	A:A	G:A	G:G	C:T	T:A	C:C	T:T	G:G	C:A	A:G	T:C	G:G	A:A	T:C	T:T	C:T	G:G	T:T	G:G	A:G	G:A	T:C	C:C
1014	HR_11_1008	2019_1st	train set	case	case	G:G	T:T	C:C	G:G	G:G	A:A	G:G	G:G	T:C	T:C	T:C	G:G	A:G	A:A	C:C	T:T	G:G	C:T	G:G	A:A	A:A	A:A	G:A	G:A	C:T	T:T	C:C	T:T	G:G	C:A	A:A	T:C	G:G	T:A	T:C	A:A	C:T	G:G	T:T	G:A	A:A	G:G	T:C	A:A
1015	HR_2_1G_RE	2019_1st	train set	case	case	No Call	T:T	C:C	G:G	G:G	A:A	G:G	G:T	T:T	T:C	T:T	G:G	A:G	A:A	C:C	T:T	G:G	C:T	G:G	A:A	A:A	A:A	G:A	G:G	C:T	T:T	C:C	T:T	G:G	C:C	A:A	T:C	G:G	T:A	T:C	A:A	C:T	G:G	T:T	G:A	A:G	G:G	T:C	C:C
1016	HR_11_1000	2019_1st	train set	case	case	G:G	T:T	T:T	G:G	G:G	A:A	G:G	G:G	T:C	T:C	T:T	G:G	A:A	A:A	C:C	T:T	G:G	C:C	A:G	A:A	A:A	G:G	G:A	G:A	T:T	T:T	C:C	T:T	G:A	C:C	A:A	T:T	G:G	T:A	T:C	A:T	C:C	G:G	T:T	G:G	A:A	G:G	T:C	A:C
1017	HR_11_992	2019_1st	train set	case	case	G:G	T:T	C:C	G:G	G:G	A:A	G:G	G:T	T:C	T:C	T:C	G:G	A:A	A:A	C:T	T:T	G:G	C:C	A:G	A:A	A:A	A:A	G:A	G:G	C:C	T:T	C:C	T:T	G:G	C:A	A:A	T:C	G:G	T:T	T:C	A:A	C:T	G:G	T:T	G:G	A:G	G:G	T:C	A:C
1018	HR_11_984	2019_1st	test set	case	case	G:G	T:T	C:C	G:G	G:G	A:A	G:G	G:T	T:C	T:C	T:C	G:G	A:G	A:A	C:C	T:T	G:G	C:C	A:G	A:A	A:A	A:A	G:A	G:G	C:C	T:T	C:C	T:T	G:G	C:A	A:A	T:C	G:G	T:T	T:C	A:A	C:T	G:G	T:T	G:A	A:A	G:G	T:C	C:C
1019	HR_11_976	2019_1st	train set	case	case	G:G	T:T	C:C	G:G	G:G	A:A	G:G	G:T	T:T	T:C	T:C	G:G	A:A	A:A	C:T	T:T	G:G	C:C	A:G	A:A	A:A	A:A	G:A	G:G	C:C	T:T	C:C	T:T	G:G	C:C	A:A	T:C	G:G	T:A	T:C	A:A	C:T	G:G	T:T	G:G	A:G	G:G	T:C	C:C
1020	HR_11_1017	2019_1st	test set	case	case	G:G	T:T	C:C	G:G	G:G	A:A	G:G	G:G	T:C	T:C	T:T	G:G	A:A	A:A	C:C	T:T	G:G	C:C	A:G	A:A	A:A	A:G	G:A	G:G	C:C	T:A	C:C	T:T	G:G	C:C	A:G	T:T	G:G	No Call	T:C	A:T	C:C	G:G	T:T	G:G	A:G	G:G	T:C	C:C
1021	HR_11_1009	2019_1st	train set	case	case	G:G	T:T	C:C	G:G	G:G	A:A	G:G	G:G	T:C	T:C	T:T	G:G	A:A	A:A	C:C	T:T	G:G	C:C	A:G	A:A	A:A	A:G	G:A	G:G	C:T	T:T	C:C	T:T	G:G	C:A	A:A	T:C	G:G	T:T	T:C	A:A	C:T	G:G	T:T	G:G	A:G	G:G	T:C	A:A
1022	HR_8_2D_RE	2019_1st	train set	case	case	G:G	T:T	C:C	G:G	G:G	A:A	G:G	G:T	T:C	T:C	T:T	G:G	A:A	A:A	C:T	T:T	G:G	C:T	G:G	A:A	A:A	A:A	G:A	G:G	C:T	T:T	C:C	T:T	G:G	C:C	A:A	T:C	G:G	A:A	T:C	A:A	C:C	G:G	T:G	A:A	A:G	G:A	T:C	A:C
1023	HR_11_1002	2019_1st	train set	case	case	G:G	T:T	C:C	G:G	G:G	A:A	G:G	G:G	T:T	T:C	T:T	G:G	A:A	A:A	C:C	T:T	G:G	C:C	A:G	A:A	A:A	A:A	G:A	G:G	C:T	T:T	C:C	T:T	G:G	C:C	A:A	T:C	G:G	A:A	T:C	A:A	C:T	G:G	T:T	A:A	A:A	G:G	T:C	A:A
1024	HR_11_1047	2019_1st	train set	case	case	G:G	T:T	T:T	G:G	G:G	A:A	G:G	G:G	T:C	T:C	T:T	G:G	A:A	A:A	C:T	T:T	G:G	C:C	A:G	A:A	A:A	A:G	G:A	G:G	T:T	T:A	C:C	T:T	G:A	C:C	A:A	T:T	G:G	T:T	T:C	T:T	C:C	G:G	T:T	A:A	A:A	G:G	T:C	A:C
1025	HR_11_986	2019_1st	train set	case	case	G:G	T:T	C:C	G:G	G:G	A:A	G:G	G:G	T:C	T:C	T:T	G:G	A:A	A:G	C:C	T:T	G:G	C:C	A:G	A:A	A:A	A:G	G:A	G:G	C:T	T:A	C:C	T:T	G:G	C:A	A:A	T:T	G:G	A:A	T:C	A:T	C:C	G:G	T:T	G:G	A:G	G:A	T:C	A:A
1026	HR_11_1031	2019_1st	train set	case	case	G:G	T:T	C:T	G:G	G:G	A:A	G:G	G:G	T:C	T:C	T:T	G:G	A:A	A:A	C:C	T:T	G:G	C:C	A:G	A:A	A:A	A:G	G:A	G:G	C:T	T:T	C:C	T:T	G:G	C:A	A:G	T:T	G:G	A:A	T:C	A:T	C:C	G:G	T:T	G:G	A:A	G:G	T:C	A:A
1027	HR_11_978	2019_1st	train set	case	case	G:G	T:T	C:T	G:G	G:G	A:A	G:G	G:G	T:C	T:C	T:T	G:G	A:A	A:A	C:C	T:T	G:G	C:C	A:G	A:A	A:A	G:G	G:A	G:G	C:T	T:T	C:C	T:T	G:G	C:C	A:A	T:T	G:G	A:A	T:C	A:T	C:C	G:G	T:T	A:A	A:A	G:G	T:C	A:A
1028	HR_11_1023	2019_1st	train set	case	case	G:G	T:T	C:C	G:G	G:G	A:A	G:G	G:G	T:C	T:C	T:T	G:G	A:A	A:G	C:C	T:T	G:G	C:C	A:G	A:A	A:A	A:A	G:A	G:G	C:C	T:T	C:C	T:T	G:G	C:C	A:A	T:C	G:G	A:A	T:C	A:T	C:T	G:G	T:T	G:G	A:A	G:G	T:C	A:A
1029	HR_11_970	2019_1st	train set	case	case	G:G	T:T	C:C	G:G	G:G	A:A	G:G	G:G	T:C	T:C	T:T	G:G	A:A	A:A	C:T	T:T	G:G	C:C	A:G	A:A	A:A	A:G	G:A	G:G	T:T	T:T	C:C	T:T	G:A	C:C	A:A	T:T	G:G	A:A	T:C	A:T	C:C	G:T	T:T	A:A	A:A	G:A	T:C	C:C
1030	HR_11_1015	2019_1st	train set	case	case	G:G	T:T	T:T	G:G	G:G	A:A	G:G	G:G	T:C	T:C	T:T	G:G	A:A	A:A	C:C	T:T	G:G	C:C	A:G	A:A	A:A	G:G	G:A	G:G	T:T	T:A	C:C	T:T	G:G	C:C	A:A	T:T	G:A	T:A	T:C	A:T	C:C	G:G	T:T	G:G	A:A	G:G	T:C	C:C
1031	HR_11_962	2019_1st	train set	case	case	G:G	T:T	T:T	G:G	G:G	A:A	G:G	G:G	T:C	T:C	T:T	G:G	A:A	A:A	C:T	T:T	G:G	C:C	A:G	A:A	A:A	A:G	G:A	G:G	T:T	T:T	C:C	T:T	G:A	C:A	A:A	T:T	G:G	T:A	T:C	A:T	C:C	G:G	T:T	G:G	A:A	G:G	T:C	A:C
1032	HR_4_7A_RE	2019_1st	train set	case	case	G:G	T:T	T:T	G:G	G:G	A:A	G:G	G:G	T:C	T:C	T:T	G:G	A:A	A:A	C:C	T:T	G:G	C:C	A:G	A:A	A:A	A:G	G:A	G:G	T:T	T:T	C:C	T:T	G:G	C:C	A:A	T:T	G:G	T:T	T:C	A:T	C:C	G:G	T:T	G:G	A:A	G:G	T:C	A:A
1033	HR_11_999	2019_1st	train set	case	case	G:G	T:T	C:C	G:G	G:G	A:A	G:G	G:G	T:C	T:C	T:T	G:G	A:A	A:A	C:C	T:T	G:G	C:C	A:G	A:A	A:A	A:A	G:A	G:G	C:C	T:T	C:C	T:T	G:G	C:A	A:A	T:C	G:G	A:A	T:C	T:T	C:T	G:G	T:T	G:G	A:A	G:G	T:C	A:C
1034	HR_11_1042	2019_1st	train set	case	case	G:G	T:T	C:C	G:G	G:G	A:A	G:G	G:T	T:C	T:C	T:T	G:G	A:A	A:A	C:C	T:T	G:G	C:T	G:G	A:A	A:A	A:A	G:A	G:G	C:T	T:T	C:C	T:T	G:G	C:A	A:A	T:C	G:G	A:A	T:C	A:A	C:T	G:G	T:T	G:A	A:A	G:G	T:C	A:A
1035	HR_11_991	2019_1st	train set	case	case	G:G	T:T	C:C	G:G	G:G	A:A	G:G	G:T	T:C	T:C	T:T	G:G	A:A	A:A	C:C	T:T	G:G	C:C	A:G	A:A	A:A	A:A	G:A	G:G	C:C	T:T	C:C	T:T	G:G	C:A	A:A	T:C	G:G	A:A	T:C	A:A	C:T	G:G	T:T	G:G	A:G	G:G	T:C	A:C
1036	HR_11_1034	2019_1st	test set	case	case	G:G	T:T	C:T	G:G	G:G	A:A	G:G	G:G	T:C	T:C	T:T	G:G	A:A	A:A	C:C	T:T	G:G	C:C	A:G	A:A	A:A	A:A	G:A	G:G	C:T	T:A	C:C	T:T	G:G	C:A	A:A	T:C	G:G	A:A	T:C	T:T	C:T	G:G	T:T	G:G	A:G	G:G	T:C	A:C
1037	HR_11_983	2019_1st	test set	case	case	G:G	T:T	C:C	G:G	G:G	A:A	G:G	G:G	T:C	T:C	T:T	G:G	A:G	A:A	C:C	T:T	G:G	C:C	A:G	A:A	A:A	A:A	G:A	G:A	C:C	T:T	C:C	T:T	G:G	C:C	A:A	T:C	G:G	A:A	T:C	A:A	C:T	G:G	T:T	G:G	A:A	G:G	T:C	A:C
1038	HR_11_1026	2019_1st	test set	case	case	No Call	T:T	C:C	G:G	G:G	A:A	G:G	G:G	T:C	T:C	T:T	G:G	A:A	A:A	C:T	T:T	G:G	C:C	A:G	A:A	A:A	A:A	G:A	G:G	C:T	T:T	C:C	T:T	G:G	C:C	A:A	T:T	G:G	A:A	T:C	A:T	C:C	G:T	T:T	A:A	A:A	G:A	T:C	C:C
1039	HR_11_975	2019_1st	test set	case	case	G:G	T:T	C:C	G:G	G:G	A:A	G:G	G:T	T:C	T:C	T:C	G:G	A:G	A:A	C:T	T:T	G:G	C:C	A:G	A:A	A:A	A:A	G:A	G:G	C:C	T:T	C:C	T:T	G:G	C:A	A:A	T:C	G:G	T:T	T:C	A:A	C:T	G:G	T:T	G:G	A:A	G:G	T:C	C:C
1040	HR_11_967	2019_1st	train set	case	case	No Call	T:T	C:C	G:G	G:G	A:A	G:G	G:G	T:T	T:C	T:T	G:G	A:A	A:A	C:C	T:T	G:G	C:C	A:G	A:A	A:A	A:A	G:A	G:G	T:T	A:A	C:C	T:T	G:G	C:C	A:A	T:T	G:A	T:T	T:C	A:T	C:C	G:G	T:T	G:G	A:A	G:G	T:C	C:C
1041	HR_11_1010	2019_1st	train set	case	case	G:G	T:T	C:C	G:G	G:G	A:A	G:G	G:G	T:C	T:C	T:T	G:G	A:A	A:A	C:T	T:T	G:G	C:C	A:G	A:A	A:A	A:A	G:A	G:A	C:C	T:T	C:C	T:T	G:G	C:A	A:A	T:C	G:G	T:T	T:C	A:A	C:T	G:G	T:T	G:A	A:A	G:G	T:C	A:C
1042	HR_7_12H_RE	2019_1st	train set	case	case	G:G	T:T	C:C	G:G	G:G	A:A	G:G	G:G	T:C	T:C	T:T	G:G	A:A	A:A	C:C	T:T	G:G	C:C	G:G	A:A	A:A	A:A	G:A	G:G	T:T	T:T	C:C	T:T	G:A	C:C	A:A	T:T	G:G	T:T	T:C	A:T	C:C	G:G	T:T	G:G	A:A	G:A	T:C	A:C
1043	HR_11_1003	2019_1st	train set	case	case	G:G	T:T	C:T	G:G	G:G	A:A	G:G	G:G	T:C	T:C	T:T	G:G	A:A	A:G	C:C	T:T	G:G	C:C	A:G	A:A	A:A	A:A	G:A	G:G	C:T	T:T	C:C	T:T	G:G	C:A	A:G	T:C	G:G	A:A	T:C	A:T	C:T	G:G	T:T	G:G	A:G	G:G	T:C	A:C
1044	HR_11_1046	2019_1st	train set	case	case	G:G	T:T	C:T	G:G	G:G	A:A	G:G	G:G	T:C	T:C	T:T	G:G	A:A	A:G	C:C	T:T	G:G	C:C	A:G	A:A	A:A	A:G	G:A	G:G	C:T	T:T	C:C	T:T	G:G	C:A	A:A	T:T	G:G	A:A	T:C	A:T	C:C	G:G	T:T	G:G	A:G	G:G	T:C	A:C
1045	HR_11_995	2019_1st	train set	case	case	G:G	T:T	C:T	G:G	G:G	A:A	G:G	G:G	T:C	T:C	T:T	G:G	A:A	A:A	C:C	T:T	G:G	C:C	A:G	A:A	A:A	A:G	G:A	G:G	C:T	T:A	C:C	T:T	G:G	C:C	A:G	T:C	G:G	A:A	T:C	T:T	C:T	G:G	T:T	G:G	A:G	G:A	T:C	A:C
1046	HR_11_1038	2019_1st	train set	case	case	G:G	T:T	C:C	G:G	G:G	A:A	G:G	G:G	T:C	T:C	T:T	G:G	A:A	A:A	C:T	T:T	G:G	C:C	A:G	A:A	A:A	A:A	G:A	G:G	T:T	T:T	C:C	T:T	G:A	C:A	A:A	T:T	G:G	T:T	T:C	A:T	C:C	G:G	T:T	A:A	A:A	G:A	T:C	A:C
1047	HR_11_987	2019_1st	train set	case	case	G:G	T:T	C:C	G:G	G:G	A:A	G:G	G:G	T:C	T:C	T:T	G:G	A:A	A:A	C:C	T:T	G:G	C:C	A:G	A:A	A:A	A:G	G:A	G:G	C:C	T:T	C:C	T:T	G:G	C:A	A:A	T:T	G:G	A:A	T:C	A:T	C:C	G:G	T:T	G:G	A:A	G:G	T:C	A:C
1048	HR_11_1030	2019_1st	train set	case	case	G:G	T:T	C:C	G:G	G:G	A:A	G:G	G:G	T:C	T:C	T:T	G:G	A:A	G:G	C:C	T:T	G:G	C:C	A:G	A:A	A:A	A:A	G:A	G:G	C:C	T:A	C:C	T:T	G:G	C:C	A:A	T:T	G:G	T:A	T:C	T:T	C:C	G:G	T:T	G:G	A:A	G:A	T:C	A:C
1049	HR_11_979	2019_1st	train set	case	case	G:G	T:T	T:T	G:G	G:G	A:A	G:G	G:G	T:C	T:C	T:T	G:G	A:A	A:A	C:C	T:T	G:G	C:C	A:G	A:A	A:A	A:A	G:A	G:G	T:T	T:T	C:C	T:T	G:G	C:A	A:A	T:C	G:G	A:A	T:C	A:T	C:T	G:G	T:T	G:G	A:A	G:G	T:C	A:C
1050	HR_11_971	2019_1st	train set	case	case	G:G	T:T	C:C	G:G	G:G	A:A	G:G	G:T	T:T	T:C	T:T	G:G	A:A	A:A	C:C	T:T	G:G	C:C	A:G	A:A	A:A	A:A	G:A	G:G	C:T	T:T	C:C	T:T	G:G	C:A	A:A	T:C	G:G	T:T	T:C	A:A	C:T	G:G	T:T	G:A	A:G	G:G	T:C	A:C
1051	HR_11_1014	2019_1st	train set	case	case	G:G	T:T	T:T	G:G	G:G	A:A	G:G	G:T	T:T	T:C	T:T	G:G	A:A	A:G	C:T	T:T	G:G	C:C	A:G	A:A	A:A	A:A	G:A	G:G	C:T	T:T	C:C	T:T	G:G	C:C	A:A	T:T	G:G	T:T	T:C	T:T	C:C	G:G	T:T	G:A	A:G	G:A	T:C	A:C
1052	HR_11_963	2019_1st	train set	case	case	G:G	T:T	C:C	G:G	G:G	A:A	G:G	G:G	T:T	T:C	T:T	G:G	A:A	A:A	C:C	T:T	G:G	C:C	A:G	A:A	A:A	A:G	G:A	G:G	C:T	T:T	C:C	T:T	G:G	C:A	A:A	T:C	G:G	T:T	T:C	A:A	C:T	G:G	T:T	G:G	A:A	G:G	T:C	A:A
1053	HR_6_8H_RE	2019_1st	train set	case	case	G:G	T:T	C:C	G:G	G:G	A:A	G:G	G:T	T:T	T:C	T:T	G:G	A:A	A:A	C:C	T:T	G:G	C:C	A:G	A:A	A:A	A:A	G:A	G:G	C:C	T:T	C:C	T:T	G:G	C:A	A:A	T:C	G:G	T:T	T:C	A:A	C:T	G:G	T:T	G:A	A:G	G:G	T:C	A:C
1054	HR_11_998	2019_1st	train set	case	case	G:G	T:T	C:C	G:G	G:G	A:A	G:G	G:G	T:C	T:C	T:T	G:G	A:A	A:A	C:C	T:T	G:G	C:C	A:G	A:A	A:A	A:G	G:A	G:G	C:C	T:T	C:C	T:T	G:G	C:C	A:G	T:C	G:G	A:A	T:C	A:T	C:T	G:G	T:T	G:G	A:G	G:A	T:C	A:C
1055	HR_11_1043	2019_1st	train set	case	case	G:G	T:T	C:C	C:C	G:G	A:A	G:G	T:T	T:C	T:C	T:T	G:G	A:G	A:A	C:T	T:T	G:G	C:C	A:G	A:A	A:A	A:A	G:A	G:G	C:T	T:T	C:C	T:T	G:G	C:C	A:A	T:T	G:G	A:A	T:C	A:T	C:C	G:G	T:G	A:A	A:A	G:A	T:C	A:C
1056	HR_11_990	2019_1st	train set	case	case	G:G	T:T	C:C	G:G	G:G	A:A	G:G	G:G	T:C	T:C	T:T	G:G	A:A	A:A	T:T	T:T	G:G	C:C	G:G	A:A	A:A	A:G	G:A	G:G	T:T	T:T	C:C	T:T	G:A	C:C	A:A	T:T	G:G	A:A	T:C	A:A	C:C	G:G	T:T	G:G	A:A	G:A	T:C	A:C
1057	HR_11_1035	2019_1st	train set	case	case	G:G	T:T	C:C	G:G	G:G	A:A	G:G	G:G	T:C	T:C	T:T	G:G	A:A	A:A	C:C	T:T	G:G	C:C	A:G	A:A	A:A	A:G	G:A	G:G	T:T	T:T	C:C	T:T	G:G	C:C	A:A	T:T	G:G	T:T	T:C	A:T	C:C	G:T	T:T	A:A	A:A	G:G	T:C	C:C
1058	HR_11_982	2019_1st	train set	case	case	G:G	T:T	C:C	G:G	G:G	A:A	G:G	G:G	T:T	T:C	T:T	G:G	A:A	A:A	T:T	T:T	G:G	C:C	A:G	A:A	A:A	A:A	G:A	G:G	C:T	T:T	C:C	T:T	G:G	C:A	A:A	T:T	G:G	T:T	T:C	A:A	C:C	G:G	T:T	G:G	A:A	G:A	T:C	A:A
1059	HR_11_974	2019_1st	train set	case	case	No Call	T:T	C:C	G:G	G:G	A:A	G:G	G:G	T:C	T:C	T:T	G:G	A:A	A:A	C:C	T:T	G:G	C:C	A:G	A:A	A:A	A:G	G:A	G:G	C:T	T:T	C:C	T:T	G:G	C:A	A:A	T:C	G:G	T:T	T:C	A:T	C:T	G:T	T:T	G:G	A:A	G:G	T:C	C:C
1060	HR_11_1019	2019_1st	train set	case	case	G:G	T:T	C:C	G:G	G:G	A:A	G:G	G:G	T:C	T:C	T:T	G:G	A:A	A:G	C:C	T:T	G:G	C:C	A:G	A:A	A:A	A:G	G:A	G:G	C:C	T:T	C:C	T:T	G:G	C:A	A:G	T:T	G:G	A:A	T:C	A:T	C:C	G:G	T:T	G:G	A:A	G:G	T:C	A:C
1061	HR_7_7H_RE	2019_1st	train set	case	case	G:G	T:T	T:T	G:G	G:G	A:A	G:G	G:G	T:C	T:C	T:T	G:G	A:A	A:A	C:C	T:T	G:G	C:C	A:G	A:A	A:A	A:A	G:A	G:G	T:T	T:T	C:C	T:T	G:G	C:C	A:A	T:C	G:G	T:T	T:C	T:T	C:T	G:G	T:T	G:G	A:G	G:G	T:C	A:A
1062	HR_11_1045	2019_1st	train set	case	case	G:G	T:T	C:C	G:C	G:G	A:A	G:G	G:T	T:C	T:C	T:T	G:G	A:A	A:A	C:T	T:T	G:G	C:C	A:G	A:A	A:A	A:A	G:A	G:G	C:C	T:T	C:C	T:T	G:G	C:C	A:A	T:C	G:G	A:A	T:C	A:A	C:C	G:G	T:G	A:A	A:A	G:A	T:C	A:C
1063	HR_11_1037	2019_1st	train set	case	case	G:G	T:T	C:C	G:G	G:G	A:A	G:G	G:T	T:C	T:C	T:T	G:G	A:A	A:A	C:T	T:T	G:G	C:C	A:G	A:A	A:A	A:A	G:A	G:G	C:C	T:T	C:C	T:T	G:G	C:C	A:A	T:C	G:G	A:A	T:C	A:A	C:T	G:G	T:T	G:A	A:A	G:G	T:C	A:C
1064	HR_11_988	2019_1st	train set	case	case	G:G	T:T	C:T	G:G	G:G	A:A	G:G	G:G	T:C	T:C	T:T	G:G	A:A	A:A	C:C	T:T	G:G	C:C	A:G	A:A	A:A	A:A	G:A	G:G	C:T	T:A	C:C	T:T	G:G	C:C	A:A	T:C	G:G	A:A	T:C	T:T	C:T	G:G	T:T	G:G	A:A	G:G	T:C	A:C
1065	HR_11_1029	2019_1st	train set	case	case	G:G	T:T	C:C	G:G	G:G	A:A	G:G	G:G	T:T	T:C	T:T	G:G	A:A	A:A	C:C	T:T	G:G	C:C	A:G	A:A	A:A	A:A	G:A	G:G	T:T	T:T	C:C	T:T	G:G	C:C	A:A	T:C	G:G	T:T	T:C	A:T	C:T	G:G	T:T	G:G	A:A	G:G	T:C	A:C
1066	HR_11_980	2019_1st	train set	case	case	No Call	T:T	C:C	G:G	G:G	A:A	G:G	G:G	T:T	T:C	T:C	G:G	A:G	A:A	C:T	T:T	G:G	C:C	A:G	A:A	A:A	A:A	G:A	G:A	C:C	T:T	C:C	T:T	G:G	C:C	A:A	T:C	G:G	T:A	T:C	A:A	C:T	G:G	T:T	G:G	A:G	G:G	T:C	C:C
1067	HR_11_1021	2019_1st	train set	case	case	G:G	T:T	C:C	G:G	G:G	A:A	G:G	G:G	T:C	T:C	T:T	G:G	A:A	G:G	C:C	T:T	G:G	C:C	A:G	A:A	A:A	A:G	G:A	G:G	C:C	T:T	C:C	T:T	G:G	C:C	A:A	T:T	G:G	T:A	T:C	T:T	C:C	G:G	T:T	G:G	A:A	G:G	T:C	A:C
1068	HR_11_972	2019_1st	train set	case	case	G:G	T:T	C:C	G:G	G:G	A:A	G:G	G:G	T:C	T:C	T:T	G:G	A:G	A:A	C:C	T:T	G:G	C:C	A:G	A:A	A:A	A:A	G:A	G:A	C:C	T:T	C:C	T:T	G:G	C:C	A:A	T:C	G:G	T:A	T:C	A:A	C:T	G:G	T:T	G:G	A:A	G:G	T:C	C:C
1069	HR_11_1013	2019_1st	train set	case	case	G:G	T:T	C:C	G:G	G:G	A:A	G:G	G:T	T:C	T:C	T:T	G:G	A:A	A:A	C:C	T:T	G:G	C:C	A:G	A:A	A:A	A:A	G:A	G:G	C:C	T:T	C:C	T:T	G:G	C:C	A:A	T:T	G:G	A:A	T:C	A:T	C:C	G:G	T:G	A:A	A:G	G:G	T:C	A:C
1070	HR_11_964	2019_1st	train set	case	case	G:G	T:T	C:C	G:G	G:G	A:A	G:G	G:G	T:C	T:C	T:T	G:G	A:A	A:A	C:C	T:T	G:G	C:C	G:G	A:A	A:A	A:A	G:A	G:G	T:T	T:T	C:C	T:T	G:A	C:C	A:A	T:T	G:G	T:A	T:C	A:T	C:C	G:T	T:T	A:A	A:A	G:G	T:C	A:C
1071	HR_11_1005	2019_1st	train set	case	case	G:G	T:T	C:T	G:G	G:G	A:A	G:G	G:G	T:C	T:C	T:T	G:G	A:A	G:G	C:C	T:T	G:G	C:C	A:G	A:A	A:A	A:G	G:A	G:G	C:C	T:T	C:C	T:T	G:G	C:C	A:G	T:T	G:G	A:A	T:C	T:T	C:C	G:G	T:T	G:G	A:A	G:A	T:C	A:C
1072	HR_7_1H_RE	2019_1st	train set	case	case	G:G	T:T	C:C	G:G	G:G	A:A	G:G	G:G	T:C	T:C	T:T	G:G	A:A	A:A	C:T	T:T	G:G	C:C	A:G	A:A	A:A	A:G	G:A	G:G	T:T	T:T	C:C	T:T	G:A	C:A	A:A	T:T	G:G	A:A	T:C	A:A	C:C	G:G	T:T	G:G	A:A	G:A	T:C	A:C
1073	HR_11_997	2019_1st	test set	case	case	G:G	T:T	C:T	G:G	G:G	A:A	G:G	G:G	T:C	T:C	T:T	G:G	A:A	A:A	C:T	T:T	G:G	C:C	A:G	A:A	A:A	A:G	G:A	G:A	T:T	T:T	C:C	T:T	G:A	C:A	A:A	T:T	G:G	T:T	T:C	A:T	C:C	G:G	T:T	G:G	A:A	G:G	T:C	A:C
1074	HR_11_1044	2019_1st	train set	case	case	G:G	T:T	C:C	G:G	G:G	A:A	G:G	G:G	T:C	T:C	T:T	G:G	A:A	A:A	C:C	T:T	G:G	C:C	A:G	A:A	A:A	A:A	G:A	G:A	C:T	T:T	C:C	T:T	G:G	C:C	A:A	T:C	G:G	T:T	T:C	A:A	C:T	G:G	T:T	G:A	A:A	G:G	T:C	A:C
1075	HR_11_989	2019_1st	train set	case	case	G:G	T:T	C:C	G:G	G:G	A:A	G:G	G:G	T:C	T:C	T:T	G:G	A:A	A:G	C:C	T:T	G:G	C:C	A:G	A:A	A:A	A:A	G:A	G:G	C:C	T:T	C:C	T:T	G:G	C:A	A:G	T:C	G:G	A:A	T:C	A:T	C:T	G:G	T:T	G:G	A:A	G:A	T:C	C:C
1076	HR_11_1036	2019_1st	train set	case	case	G:G	T:T	C:C	G:G	G:G	A:A	G:G	G:G	T:C	T:C	T:T	G:G	A:G	A:A	C:C	T:T	G:G	C:C	A:G	A:A	A:A	A:A	G:A	G:A	C:C	T:T	C:C	T:T	G:G	C:A	A:A	T:C	G:G	T:T	T:C	A:A	C:T	G:G	T:T	G:A	A:A	G:G	T:C	A:C
1077	HR_11_1028	2019_1st	train set	case	case	G:G	T:T	C:C	G:G	G:G	A:A	G:G	G:T	T:C	T:C	T:T	G:G	A:A	A:A	C:C	T:T	G:G	C:C	A:G	A:A	A:A	A:A	G:A	G:G	C:C	T:T	C:C	T:T	G:G	C:C	A:A	T:C	G:G	T:A	T:C	A:A	C:T	G:G	T:T	G:G	A:A	G:G	T:C	C:C
1078	HR_11_1020	2019_1st	train set	case	case	G:G	T:T	C:C	G:G	G:G	A:A	G:G	G:G	T:C	T:C	T:T	G:G	A:A	A:A	C:C	T:T	G:G	C:C	A:G	A:A	A:A	A:G	G:A	G:G	C:T	T:T	C:C	T:T	G:G	C:C	A:A	T:C	G:G	T:T	T:C	A:T	C:C	G:T	T:G	A:A	A:A	G:G	T:C	A:C
1079	HR_11_965	2019_1st	train set	case	case	G:G	T:T	C:C	G:G	G:G	A:A	G:G	G:G	T:C	T:C	T:T	G:G	A:A	A:A	C:T	T:T	G:G	C:C	A:G	A:A	A:A	A:A	G:A	G:A	C:C	T:T	C:C	T:T	G:G	C:A	A:A	T:C	G:G	T:A	T:C	A:A	C:T	G:G	T:T	G:G	A:A	G:G	T:C	A:C
1080	1_8	2019_2nd	train set	control	control	G:G	T:T	C:C	G:G	G:G	A:A	G:G	G:G	T:C	T:C	T:C	G:G	A:G	A:A	C:C	T:T	G:G	C:C	A:G	A:A	A:A	A:A	G:A	G:A	C:C	T:T	C:C	T:T	G:G	C:C	A:A	T:C	G:G	T:T	T:C	A:A	C:T	G:G	T:T	G:A	A:A	G:G	T:C	A:A
1081	1_9	2019_2nd	train set	control	control	G:G	T:T	C:C	G:G	G:G	A:A	G:G	G:G	T:C	T:C	T:T	G:G	A:A	A:A	C:C	T:T	G:G	C:C	A:G	A:A	A:A	A:A	G:A	G:A	C:C	T:T	C:C	T:T	G:G	C:A	A:A	T:C	G:G	T:T	T:C	A:A	C:T	G:G	T:T	G:A	A:A	G:G	T:C	A:A
1082	1_10	2019_2nd	train set	control	control	G:G	T:T	C:C	G:G	G:G	A:A	G:G	G:T	T:T	T:C	T:C	G:G	A:G	A:A	C:C	T:T	G:G	C:C	A:G	A:A	A:A	A:A	G:A	G:G	C:C	T:T	C:C	T:T	G:G	C:A	A:A	T:C	G:G	T:T	T:C	A:A	C:T	G:G	T:T	G:A	A:G	G:G	T:C	A:C
1083	1_11	2019_2nd	train set	control	control	G:G	T:T	C:C	G:G	G:G	A:A	G:G	G:G	T:T	T:C	T:T	G:G	A:A	A:A	C:C	T:T	G:G	C:C	A:G	A:A	A:A	A:G	G:A	G:G	C:T	T:T	C:C	T:T	G:G	C:C	A:A	T:T	G:G	T:A	T:C	A:T	C:C	G:G	T:T	A:A	A:A	G:G	T:C	A:C
1084	1_13	2019_2nd	train set	control	control	G:G	T:T	C:C	G:G	G:G	A:A	G:G	G:G	T:C	T:C	T:T	G:G	A:A	A:A	C:C	T:T	G:G	C:C	A:G	A:A	A:A	A:A	G:A	G:A	C:T	T:T	C:C	T:T	G:G	C:C	A:A	T:C	G:G	T:A	T:C	A:A	C:T	G:G	T:T	G:A	A:A	G:G	T:C	A:C
1085	1_14	2019_2nd	train set	control	control	G:G	T:T	C:C	G:G	G:G	A:A	G:G	G:T	T:C	T:C	T:C	G:G	A:G	A:A	C:C	T:T	G:G	C:C	A:G	A:A	A:A	A:A	G:A	G:G	C:T	T:T	C:C	T:T	G:G	C:C	A:A	T:C	G:G	T:T	T:C	A:A	C:T	G:G	T:T	G:A	A:A	G:G	T:C	A:A
1086	1_15	2019_2nd	train set	control	control	G:G	T:T	C:C	G:G	G:G	A:A	G:G	G:G	T:C	T:C	T:T	G:G	A:A	A:A	C:T	T:T	G:G	C:C	A:G	A:A	A:A	A:G	G:A	G:G	C:T	T:T	C:C	T:T	G:G	C:A	A:A	T:C	G:G	T:T	T:C	A:A	C:T	G:G	T:T	G:G	A:A	G:A	T:C	A:C
1087	1_16	2019_2nd	train set	control	control	G:G	T:T	C:C	G:G	G:G	A:A	G:G	G:G	T:C	T:C	T:T	G:G	A:A	A:A	T:T	T:T	G:G	C:C	G:G	A:A	A:A	A:A	G:A	G:G	T:T	T:T	C:C	T:T	G:G	C:C	A:A	T:C	G:G	A:A	T:C	A:T	C:T	G:T	T:T	A:A	A:A	G:A	T:C	C:C
1088	1_17	2019_2nd	train set	control	control	G:G	T:T	C:C	G:G	G:G	A:A	G:G	G:G	T:T	T:C	T:T	G:G	A:A	A:A	C:C	T:T	G:G	T:T	G:G	A:A	A:A	A:G	G:A	G:G	T:T	T:T	C:C	T:T	G:G	C:A	A:A	T:T	G:G	A:A	T:C	A:T	C:C	G:G	T:T	G:G	A:A	G:G	T:C	A:A
1089	1_18	2019_2nd	train set	control	control	G:G	T:T	C:C	G:G	G:G	A:A	G:G	G:T	T:T	T:C	T:T	G:G	A:A	A:A	C:C	T:T	G:G	T:T	G:G	A:A	A:A	A:A	G:A	G:G	C:T	T:T	C:C	T:T	G:G	C:A	A:A	T:C	G:G	T:T	T:C	A:A	C:T	G:G	T:T	G:A	A:G	G:G	T:C	C:C
1090	1_19	2019_2nd	train set	control	control	G:G	T:T	C:C	G:G	G:G	A:A	G:G	G:G	T:C	T:C	T:T	G:G	A:A	A:A	C:C	T:T	G:G	C:C	A:G	A:A	A:A	A:G	G:A	G:G	C:C	T:A	C:C	T:T	G:G	C:A	A:G	T:T	G:G	A:A	T:C	A:T	C:C	G:G	T:T	G:G	A:G	G:A	T:C	C:C
1091	1_21	2019_2nd	train set	control	control	G:G	T:T	C:C	G:G	G:G	A:A	G:G	G:G	T:C	T:C	T:T	G:G	A:A	A:G	C:C	T:T	G:G	C:C	A:G	A:A	A:A	A:A	G:A	G:G	C:C	T:T	C:C	T:T	G:G	C:A	A:A	T:C	G:G	A:A	T:C	A:T	C:T	G:G	T:T	G:G	A:G	G:G	T:C	A:C
1092	1_22	2019_2nd	train set	control	control	G:G	T:T	C:C	G:G	G:G	A:A	G:G	G:T	T:T	T:C	T:C	G:G	A:G	A:A	C:C	T:T	G:G	C:C	A:G	A:A	A:A	A:A	G:A	G:G	C:C	T:T	C:C	T:T	G:G	C:C	A:A	T:C	G:G	T:T	T:C	A:A	C:T	G:G	T:T	G:A	A:G	G:G	T:C	A:A
1093	1_23	2019_2nd	train set	control	control	G:G	T:T	C:C	G:G	G:G	A:A	G:G	G:G	T:T	T:C	T:T	G:G	A:A	A:A	C:C	T:T	G:G	C:C	A:G	A:A	A:A	A:A	G:A	G:G	C:T	T:T	C:C	T:T	G:G	C:C	A:A	T:T	G:G	T:A	T:C	A:A	C:C	G:G	T:T	A:A	A:A	G:G	T:C	A:C
1094	1_25	2019_2nd	train set	control	control	G:G	T:T	C:C	G:G	G:G	A:A	G:G	G:G	T:C	T:C	T:T	G:G	A:A	A:A	C:C	T:T	G:G	C:C	A:G	A:A	A:A	A:A	G:A	G:G	C:C	T:T	C:C	T:T	G:G	C:A	A:A	T:C	G:G	A:A	T:C	A:T	C:T	G:G	T:T	G:G	A:A	G:A	T:C	A:C
1095	1_26	2019_2nd	train set	control	control	G:G	T:T	C:C	G:G	G:G	A:A	G:G	G:G	T:T	T:C	T:T	G:G	A:G	A:A	C:C	T:T	G:G	C:C	G:G	A:A	A:A	A:A	G:A	G:A	C:T	T:T	C:C	T:T	G:G	C:C	A:A	T:C	G:G	T:A	T:C	A:A	C:T	G:G	T:T	G:A	A:G	G:G	T:C	A:C
1096	1_27	2019_2nd	train set	control	control	G:G	T:T	C:C	G:G	G:G	A:A	G:G	G:G	T:C	T:C	T:T	G:G	A:A	A:A	C:C	T:T	G:G	C:C	A:G	A:A	A:A	A:A	G:A	G:G	C:C	T:A	C:C	T:T	G:G	C:A	A:G	T:C	G:G	T:A	T:C	A:T	C:T	G:G	T:T	G:G	A:A	G:A	T:C	A:C
1097	1_29	2019_2nd	test set	control	control	G:G	T:T	C:C	G:G	G:G	A:A	G:G	G:T	T:C	T:C	T:T	G:G	A:A	A:A	C:C	T:T	G:G	C:C	A:G	A:A	A:A	A:A	G:A	G:G	C:C	T:T	C:C	T:T	G:G	C:A	A:A	T:C	G:G	T:A	T:C	A:A	C:T	G:G	T:T	G:A	A:A	G:G	T:C	C:C
1098	1_31	2019_2nd	train set	control	control	G:G	T:T	C:C	G:G	G:G	A:A	G:G	G:T	T:C	T:C	T:C	G:G	A:G	A:A	C:C	T:T	G:G	C:C	A:G	A:A	A:A	A:A	G:A	G:G	C:T	T:T	C:C	T:T	G:G	C:A	A:A	T:C	G:G	T:A	T:C	A:A	C:T	G:G	T:T	G:A	A:A	G:G	T:C	A:C
1099	1_32	2019_2nd	train set	control	control	G:G	T:T	C:C	G:G	G:G	A:A	G:G	G:T	T:C	T:C	T:T	G:G	A:A	A:A	C:C	T:T	G:G	C:C	A:G	A:A	A:A	A:A	G:A	G:G	C:T	T:T	C:C	T:T	G:G	C:A	A:A	T:C	G:G	A:A	T:C	A:A	C:T	G:G	T:T	G:A	A:G	G:G	T:C	C:C
1100	1_33	2019_2nd	test set	control	control	G:G	T:T	C:C	G:G	G:G	A:A	G:G	G:T	T:C	T:C	T:T	G:G	A:G	A:A	C:C	T:T	G:G	T:T	G:G	A:A	A:A	A:A	G:A	G:G	C:T	T:T	C:C	T:T	G:G	C:C	A:A	T:C	G:G	T:A	T:C	A:A	C:T	G:G	T:T	G:A	A:A	G:G	T:C	A:A
1101	1_34	2019_2nd	train set	control	control	G:G	T:T	C:T	G:G	G:G	A:A	G:G	G:G	T:C	T:C	T:T	G:G	A:A	G:G	C:C	T:T	G:G	C:C	A:G	A:A	A:A	A:A	G:A	G:G	C:C	T:A	C:C	T:T	G:G	C:C	A:A	T:C	G:G	A:A	T:C	T:T	C:T	G:G	T:T	G:G	A:A	G:A	T:C	A:C
1102	1_35	2019_2nd	train set	control	control	G:G	T:T	C:C	G:G	G:G	A:A	G:G	G:G	T:C	T:C	T:T	G:G	A:A	A:A	C:C	T:T	G:G	C:C	A:G	A:A	A:A	A:A	G:A	G:G	C:T	T:T	C:C	T:T	G:G	C:C	A:A	T:T	G:G	A:A	T:C	A:T	C:C	G:T	T:T	A:A	A:A	G:G	T:C	A:C
1103	1_36	2019_2nd	train set	control	control	G:G	T:T	C:C	G:G	G:G	A:A	G:G	G:T	T:C	T:C	T:T	G:G	A:A	A:A	C:C	T:T	G:G	C:C	A:G	A:A	A:A	A:A	G:A	G:G	C:T	T:T	C:C	T:T	G:G	C:C	A:A	T:C	G:G	A:A	T:C	A:A	C:T	G:G	T:T	G:A	A:A	G:G	T:C	C:C
1104	1_37	2019_2nd	train set	control	control	G:G	T:T	C:C	G:G	G:G	A:A	G:G	G:T	T:T	T:C	T:T	G:G	A:A	A:A	C:C	T:T	G:G	C:T	G:G	A:A	A:A	A:A	G:A	G:G	C:T	T:T	C:C	T:T	G:G	C:A	A:A	T:C	G:G	T:T	T:C	A:A	C:T	G:G	T:T	G:A	A:G	G:G	T:C	A:C
1105	1_38	2019_2nd	train set	control	control	G:G	T:T	C:C	G:G	G:G	A:A	G:G	G:T	T:C	T:C	T:C	G:G	A:A	A:A	C:C	T:T	G:G	C:C	A:G	A:A	A:A	A:A	G:A	G:G	C:C	T:T	C:C	T:T	G:G	C:C	A:A	T:C	G:G	T:A	T:C	A:A	C:T	G:G	T:T	G:A	A:G	G:G	T:C	A:C
1106	1_39	2019_2nd	test set	control	control	G:G	T:T	C:C	G:G	G:G	A:A	G:G	G:G	T:C	T:C	T:T	G:G	A:A	A:G	C:C	T:T	G:G	C:C	A:G	A:A	A:A	A:G	G:A	G:G	C:C	T:A	C:C	T:T	G:G	C:A	A:G	T:T	G:G	T:A	T:C	A:T	C:C	G:G	T:T	G:G	A:A	G:A	T:C	A:C
1107	1_40	2019_2nd	train set	control	control	G:G	T:T	C:C	G:G	G:G	A:A	G:G	G:G	T:C	T:C	T:T	G:G	A:A	A:A	C:C	T:T	G:G	C:C	A:G	A:A	A:A	A:A	G:A	G:A	C:C	T:T	C:C	T:T	G:G	C:C	A:A	T:C	G:G	T:T	T:C	A:A	C:T	G:G	T:T	G:A	A:G	G:G	T:C	A:A
1108	1_41	2019_2nd	train set	control	control	G:G	T:T	C:C	G:G	G:G	A:A	G:G	G:T	T:C	T:C	T:T	G:G	A:A	A:A	C:C	T:T	G:G	C:C	G:G	A:A	A:A	A:A	G:A	G:G	C:T	T:T	C:C	T:T	G:G	C:C	A:A	T:C	G:G	T:T	T:C	A:A	C:T	G:G	T:T	G:A	A:A	G:G	T:C	A:C
1109	1_42	2019_2nd	train set	control	control	G:G	T:T	C:C	G:G	G:G	A:A	G:G	G:T	T:T	T:C	T:C	G:G	A:G	A:A	C:C	T:T	G:G	C:C	A:G	A:A	A:A	A:A	G:A	G:G	C:C	T:T	C:C	T:T	G:G	C:C	A:A	T:C	G:G	T:T	T:C	A:A	C:T	G:G	T:T	G:A	A:G	G:G	T:C	A:C
1110	1_44	2019_2nd	train set	control	control	G:G	T:T	C:C	G:G	G:G	A:A	G:G	G:T	T:C	T:C	T:C	G:G	A:A	A:A	C:C	T:T	G:G	C:C	A:G	A:A	A:A	A:A	G:A	G:G	C:C	T:T	C:C	T:T	G:G	C:A	A:A	T:C	G:G	A:A	T:C	A:A	C:T	G:G	T:T	G:A	A:A	G:G	T:C	A:C
1111	1_45	2019_2nd	train set	control	control	No Call	T:T	C:C	G:G	G:G	A:A	G:G	G:G	T:C	T:C	T:T	G:G	A:A	A:A	No Call	T:T	G:G	C:C	A:G	A:A	A:A	A:A	G:A	G:G	C:T	T:T	C:C	T:T	G:G	C:A	A:A	T:T	G:G	A:A	T:C	A:T	C:C	G:T	T:T	G:G	A:A	G:A	T:C	C:C
1112	1_46	2019_2nd	test set	control	control	G:G	T:T	C:C	G:G	G:G	A:A	G:G	G:T	T:C	T:C	T:C	G:G	A:G	A:A	C:C	T:T	G:G	C:C	A:G	A:A	A:A	A:A	G:A	G:G	C:T	T:T	C:C	T:T	G:G	C:A	A:A	T:C	G:G	T:T	T:C	A:A	C:T	G:G	T:T	G:A	A:A	G:G	T:C	C:C
1113	1_47	2019_2nd	train set	control	control	No Call	T:T	C:C	G:G	G:G	A:A	G:G	G:T	T:C	T:C	C:C	G:G	A:A	A:A	C:C	T:T	G:G	C:C	A:G	A:A	A:A	A:A	G:A	G:G	C:C	T:T	C:C	T:T	G:G	C:A	A:A	T:C	G:G	T:A	T:C	A:A	C:T	G:G	T:T	G:G	A:A	G:G	T:C	C:C
1114	1_48	2019_2nd	train set	control	control	G:G	T:T	C:C	G:G	G:G	A:A	G:G	G:G	T:C	T:C	T:T	G:G	A:A	A:A	C:C	T:T	G:G	C:T	G:G	A:A	A:A	A:A	G:A	G:A	C:T	T:T	C:C	T:T	G:G	C:C	A:A	T:C	G:G	T:T	T:C	A:A	C:T	G:G	T:T	G:A	A:A	G:G	T:C	A:C
1115	1_49	2019_2nd	train set	control	control	No Call	T:T	C:C	G:G	G:G	A:A	G:G	G:T	T:C	T:C	T:T	G:G	A:A	A:A	C:C	T:T	G:G	C:C	A:G	A:A	A:A	A:A	G:A	G:G	C:C	T:T	C:C	T:T	G:G	C:A	A:A	T:C	G:G	T:T	T:C	A:A	C:T	G:G	T:T	G:A	A:A	G:G	T:C	C:C
1116	1_50	2019_2nd	train set	control	control	G:G	T:T	C:T	G:G	G:G	A:A	G:G	G:G	T:C	T:C	T:T	G:G	A:A	G:G	C:C	T:T	G:G	C:C	A:G	A:A	A:A	A:A	G:A	G:G	C:T	T:T	C:C	T:T	G:G	C:A	A:G	T:C	G:G	T:T	T:C	T:T	C:T	G:G	T:T	G:A	A:G	G:A	T:C	A:C
1117	1_51	2019_2nd	train set	control	control	G:G	T:T	C:T	G:G	G:G	A:A	G:G	G:G	T:C	T:C	T:T	G:G	A:A	A:G	C:C	T:T	G:G	C:C	A:G	A:A	A:A	A:A	G:A	G:G	C:T	T:T	C:C	T:T	G:G	C:A	A:G	T:T	G:G	A:A	T:C	A:T	C:C	G:G	T:T	G:G	A:G	G:G	T:C	A:C
1118	1_52	2019_2nd	train set	control	control	G:G	T:T	C:C	G:G	G:G	A:A	G:G	G:G	T:C	T:C	T:T	G:G	A:A	A:A	C:C	T:T	G:G	C:C	A:G	A:A	A:A	A:A	G:A	G:A	C:C	T:T	C:C	T:T	G:G	C:C	A:A	T:C	G:G	T:A	T:C	A:A	C:T	G:G	T:T	G:G	A:G	G:G	T:C	A:C
1119	1_53	2019_2nd	train set	control	control	G:G	T:T	C:T	G:G	G:G	A:A	G:G	G:G	T:C	T:C	T:T	G:G	A:A	A:A	C:C	T:T	G:G	C:C	A:G	A:A	A:A	A:A	G:A	G:G	C:T	T:T	C:C	T:T	G:G	C:A	A:A	T:T	G:G	A:A	T:C	A:T	C:C	G:G	T:T	G:G	A:A	G:G	T:C	A:A
1120	1_54	2019_2nd	train set	control	control	No Call	T:T	C:C	G:G	G:G	A:A	G:G	G:G	T:C	T:C	T:T	G:G	A:A	A:A	C:C	T:T	G:G	C:C	A:G	A:A	A:A	A:A	G:A	G:G	C:T	T:T	C:C	T:T	G:G	C:C	A:A	T:T	G:G	T:T	T:C	A:T	C:C	G:T	T:T	A:A	A:A	G:G	T:C	C:C
1121	1_55	2019_2nd	train set	control	control	No Call	T:T	C:C	G:G	G:G	A:A	G:G	G:G	T:C	T:C	T:T	G:G	A:A	A:A	C:C	T:T	G:G	C:C	A:G	A:A	A:A	A:A	G:A	G:A	C:C	T:T	C:C	T:T	G:G	C:A	A:A	T:C	G:G	A:A	T:C	A:A	C:T	G:G	T:T	G:G	A:G	G:G	T:C	C:C
1122	1_56	2019_2nd	train set	control	control	G:G	T:T	C:C	G:G	G:G	A:A	G:G	G:G	T:C	T:C	T:T	G:G	A:A	A:A	C:C	T:T	G:G	C:C	G:G	A:A	A:A	A:A	G:A	G:G	T:T	T:T	C:C	T:T	G:G	C:A	A:A	T:T	G:G	T:T	T:C	A:A	C:C	G:G	T:T	G:G	A:A	G:A	T:C	A:C
1123	1_57	2019_2nd	test set	control	control	G:G	T:T	C:C	G:G	G:G	A:A	G:G	G:G	T:C	T:C	T:T	G:G	A:A	A:A	C:C	T:T	G:G	C:C	A:G	A:A	A:A	A:A	G:A	G:G	C:C	T:T	C:C	T:T	G:G	C:C	A:A	T:C	G:G	A:A	T:C	A:T	C:T	G:G	T:T	G:G	A:A	G:A	T:C	A:C
1124	1_58	2019_2nd	train set	control	control	G:G	T:T	C:C	G:G	G:G	A:A	G:G	G:T	T:C	T:C	T:T	G:G	A:G	A:A	C:C	T:T	G:G	C:C	A:G	A:A	A:A	A:A	G:A	G:G	C:C	T:T	C:C	T:T	G:G	C:A	A:A	T:C	G:G	T:T	T:C	A:A	C:T	G:G	T:T	G:A	A:A	G:G	T:C	A:C
1125	1_60	2019_2nd	train set	control	control	G:G	T:T	C:C	G:G	G:G	A:A	G:G	G:G	T:T	T:C	T:T	G:G	A:A	A:A	C:C	T:T	G:G	C:C	A:G	A:A	A:A	A:G	G:A	G:G	C:T	T:T	C:C	T:T	G:G	C:C	A:A	T:T	G:G	A:A	T:C	A:A	C:C	G:G	T:T	A:A	A:A	G:G	T:C	A:C
1126	1_62	2019_2nd	train set	control	control	G:G	T:T	C:C	G:G	G:G	A:A	G:G	G:G	T:C	T:C	T:T	G:G	A:A	A:G	C:C	T:T	G:G	C:C	A:G	A:A	A:A	A:A	G:A	G:G	C:C	T:A	C:C	T:T	G:G	C:A	A:G	T:C	G:G	A:A	T:C	A:T	C:T	G:G	T:T	G:G	A:A	G:G	T:C	A:C
1127	1_63	2019_2nd	train set	control	control	G:G	T:T	C:C	G:G	G:G	A:A	G:G	G:G	T:C	T:C	T:T	G:G	A:A	A:A	C:C	T:T	G:G	C:C	A:G	A:A	A:A	A:G	G:A	G:G	C:T	T:T	C:C	T:T	G:G	C:A	A:A	T:C	G:G	T:T	T:C	A:A	C:T	G:G	T:T	G:G	A:A	G:G	T:C	A:A
1128	1_64	2019_2nd	train set	control	control	G:G	T:T	C:C	G:G	G:G	A:A	G:G	G:T	T:C	T:C	T:T	G:G	A:G	A:A	C:C	T:T	G:G	C:C	A:G	A:A	A:A	A:A	G:A	G:G	C:C	T:T	C:C	T:T	G:G	C:C	A:A	T:C	G:G	A:A	T:C	A:A	C:T	G:G	T:T	G:A	A:A	G:G	T:C	A:C
1129	1_65	2019_2nd	train set	control	control	G:G	T:T	C:C	G:G	G:G	A:A	G:G	G:T	T:C	T:C	T:T	G:G	A:G	A:A	C:C	T:T	G:G	C:C	A:G	A:A	A:A	A:A	G:A	G:G	C:C	T:T	C:C	T:T	G:G	C:A	A:A	T:C	G:G	T:T	T:C	A:A	C:T	G:G	T:T	G:A	A:A	G:G	T:C	A:A
1130	1_66	2019_2nd	train set	control	control	G:G	T:T	C:C	G:G	G:G	A:A	G:G	G:G	T:C	T:C	T:T	G:G	A:A	G:G	C:C	T:T	G:G	C:C	A:G	A:A	A:A	A:G	G:A	G:G	C:C	T:A	C:C	T:T	G:G	C:C	A:G	T:T	G:G	A:A	T:C	T:T	C:C	G:G	T:T	G:A	A:A	G:A	T:C	A:C
1131	1_67	2019_2nd	train set	control	control	G:G	T:T	C:C	G:G	G:G	A:A	G:G	G:G	T:C	T:C	T:T	G:G	A:A	A:A	C:C	T:T	G:G	C:C	A:G	A:A	A:A	A:A	G:A	G:G	C:T	T:T	C:C	T:T	G:G	C:A	A:A	T:C	G:G	A:A	T:C	A:T	C:T	G:T	T:T	A:A	A:A	G:A	T:C	C:C
1132	1_70	2019_2nd	train set	control	control	G:G	T:T	C:C	G:G	G:G	A:A	G:G	G:G	T:C	T:C	T:T	G:G	A:G	A:A	C:C	T:T	G:G	C:C	A:G	A:A	A:A	A:A	G:A	G:A	C:T	T:T	C:C	T:T	G:G	C:C	A:A	T:C	G:G	T:T	T:C	A:A	C:T	G:G	T:T	G:A	A:A	G:G	T:C	A:A
1133	1_71	2019_2nd	train set	control	control	G:G	T:T	C:C	G:G	G:G	A:A	G:G	G:T	T:C	T:C	C:C	G:G	A:G	A:A	C:C	T:T	G:G	C:C	A:G	A:A	A:A	A:A	G:A	G:G	C:C	T:T	C:C	T:T	G:G	C:C	A:A	T:C	G:G	A:A	T:C	A:A	C:T	G:G	T:T	G:A	A:A	G:G	T:C	A:C
1134	1_72	2019_2nd	train set	control	control	G:G	T:T	C:C	G:G	G:G	A:A	G:G	G:G	T:C	T:C	T:T	G:G	A:A	A:A	No Call	T:T	G:G	C:C	A:G	A:A	A:A	A:G	G:A	G:G	C:T	T:T	C:C	T:T	G:G	C:C	A:A	T:C	G:G	T:T	T:C	A:T	C:T	G:G	T:T	A:A	A:A	G:A	T:C	A:A
1135	1_73	2019_2nd	train set	control	control	G:G	T:T	C:C	G:G	G:G	A:A	G:G	G:T	T:C	T:C	T:T	G:G	A:A	A:A	C:C	T:T	G:G	C:C	G:G	A:A	A:A	A:A	G:A	G:G	C:T	T:T	C:C	T:T	G:G	C:A	A:A	T:C	G:G	A:A	T:C	A:A	C:T	G:G	T:T	G:A	A:A	G:G	T:C	A:C
1136	1_74	2019_2nd	train set	control	control	No Call	T:T	C:C	G:G	G:G	A:A	G:G	G:T	T:C	T:C	C:C	G:G	A:A	A:A	C:C	T:T	G:G	No Call	G:G	A:A	A:A	A:A	G:A	G:G	C:T	T:T	C:C	T:T	G:G	C:C	A:A	T:C	G:G	T:T	T:C	A:A	C:T	G:G	T:T	G:A	A:A	G:G	T:C	C:C
1137	1_75	2019_2nd	train set	control	control	G:G	T:T	C:C	G:G	G:G	A:A	G:G	G:G	T:T	T:C	T:T	G:G	A:A	A:A	C:C	T:T	G:G	C:C	A:G	A:A	A:A	A:A	G:A	G:G	C:T	T:A	C:C	T:T	G:G	A:A	A:G	T:T	G:G	T:T	T:C	A:T	T:T	G:G	T:G	G:G	A:A	G:G	T:C	A:A
1138	1_76	2019_2nd	train set	control	control	G:G	T:T	C:C	G:G	G:G	A:A	G:G	G:G	T:C	T:C	C:C	G:G	A:G	A:A	C:C	T:T	G:G	C:C	A:G	A:A	A:A	A:A	G:A	G:A	C:C	T:T	C:C	T:T	G:G	C:A	A:A	T:C	G:G	T:A	T:C	A:A	C:T	G:G	T:T	G:A	A:A	G:G	T:C	C:C
1139	1_77	2019_2nd	train set	control	control	G:G	T:T	C:C	G:G	G:G	A:A	G:G	G:G	T:C	T:C	T:T	G:G	A:G	A:A	C:C	T:T	G:G	C:C	A:G	A:A	A:A	A:A	G:A	G:A	C:C	T:T	C:C	T:T	G:G	C:C	A:A	T:C	G:G	T:A	T:C	A:A	C:T	G:G	T:T	G:A	A:A	G:G	T:C	A:A
1140	1_78	2019_2nd	train set	control	control	G:G	T:T	C:C	G:G	G:G	A:A	G:G	G:G	T:C	T:C	T:T	G:G	A:A	A:A	C:C	T:T	G:G	C:C	A:G	A:A	A:A	A:A	G:A	G:G	C:C	T:A	C:C	T:T	G:G	C:C	A:A	T:C	G:G	A:A	T:C	T:T	C:T	G:G	T:T	G:G	A:G	G:A	T:C	A:A
1141	1_79	2019_2nd	train set	control	control	G:G	T:T	C:C	G:G	G:G	A:A	G:G	G:T	T:C	T:C	T:T	G:G	A:A	A:A	C:C	T:T	G:G	C:C	A:G	A:A	A:A	A:A	G:A	G:G	C:T	T:T	C:C	T:T	G:G	C:C	A:A	T:C	G:G	T:T	T:C	A:A	C:T	G:G	T:T	G:A	A:A	G:G	T:C	A:C
1142	1_81	2019_2nd	train set	control	control	G:G	T:T	C:C	G:G	G:G	A:A	G:G	G:G	T:C	T:C	T:T	G:G	A:A	A:G	C:C	T:T	G:G	C:C	A:G	A:A	A:A	A:A	G:A	G:G	C:C	T:A	C:C	T:T	G:G	C:C	A:A	T:C	G:G	A:A	T:C	A:T	C:T	G:G	T:T	G:G	A:A	G:G	T:C	A:A
1143	1_82	2019_2nd	train set	control	control	G:G	T:T	C:C	G:G	G:G	A:A	G:G	G:T	T:T	T:C	T:T	G:G	A:G	A:A	C:C	T:T	G:G	C:C	A:G	A:A	A:A	A:A	G:A	G:G	C:C	T:T	C:C	T:T	G:G	C:A	A:A	T:C	G:G	T:T	T:C	A:A	C:T	G:G	T:T	G:G	A:G	G:G	T:C	A:C
1144	1_83	2019_2nd	train set	control	control	G:G	T:T	C:T	G:G	G:G	A:A	G:G	G:G	T:C	T:C	T:T	G:G	A:A	A:A	C:C	T:T	G:G	C:C	A:G	A:A	A:A	A:A	G:A	G:G	C:T	T:T	C:C	T:T	G:G	C:C	A:A	T:T	G:G	A:A	T:C	T:T	C:C	G:G	T:T	G:G	A:G	G:A	T:C	C:C
1145	1_85	2019_2nd	train set	control	control	No Call	T:T	C:C	G:C	G:G	A:A	G:G	G:T	T:C	T:C	T:T	G:G	A:A	A:A	No Call	T:T	G:G	T:T	G:G	A:A	A:A	A:A	G:A	G:G	C:T	T:T	C:C	T:T	G:G	C:C	A:A	T:C	G:G	A:A	T:C	A:T	C:C	G:G	T:G	A:A	A:A	A:A	T:C	C:C
1146	1_86	2019_2nd	train set	control	control	G:G	T:T	C:C	G:G	G:G	A:A	G:G	G:G	T:C	T:C	T:T	G:G	A:A	A:A	T:T	T:T	G:G	C:C	A:G	A:A	A:A	A:G	G:A	G:G	C:T	T:T	C:C	T:T	G:G	C:A	A:A	T:C	G:G	T:A	T:C	A:A	C:T	G:T	T:T	A:A	A:A	G:A	T:C	A:C
1147	1_87	2019_2nd	train set	control	control	G:G	T:T	C:C	G:G	G:G	A:A	G:G	G:G	T:C	T:C	T:T	G:G	A:A	A:A	No Call	T:T	G:G	C:C	A:G	A:A	A:A	A:G	G:A	G:G	C:T	T:T	C:C	T:T	G:G	C:A	A:A	T:T	G:G	A:A	T:C	A:T	C:C	G:T	T:T	A:A	A:A	G:A	T:C	A:C
1148	1_88	2019_2nd	train set	control	control	G:G	T:T	C:C	G:G	G:G	A:A	G:G	G:G	T:C	T:C	T:T	G:G	A:A	A:A	C:C	T:T	G:G	C:C	A:G	A:A	A:A	A:A	G:A	G:G	T:T	T:T	C:C	T:T	G:G	C:C	A:A	T:C	G:G	A:A	T:C	A:T	C:T	G:T	T:T	G:G	A:A	G:G	T:C	A:C
1149	1_89	2019_2nd	train set	control	control	G:G	T:T	C:T	G:G	G:G	A:A	G:G	G:G	T:C	T:C	T:T	G:G	A:A	A:A	C:C	T:T	G:G	C:C	A:G	A:A	A:A	A:A	G:A	G:G	C:T	T:A	C:C	T:T	G:G	C:C	A:A	T:C	G:G	A:A	T:C	T:T	C:T	G:G	T:T	G:G	A:G	G:A	T:C	A:A
1150	1_90	2019_2nd	train set	control	control	G:G	T:T	C:C	G:G	G:G	A:A	G:G	G:G	T:C	T:C	T:T	G:G	A:A	A:A	C:C	T:T	G:G	C:C	A:G	A:A	A:A	A:G	G:A	G:G	C:T	T:T	C:C	T:T	G:G	C:A	A:A	T:T	G:G	T:T	T:C	A:T	C:C	G:T	T:T	G:G	A:A	G:A	T:C	A:C
1151	1_91	2019_2nd	test set	control	control	G:G	T:T	C:C	G:G	G:G	A:A	G:G	G:T	T:T	T:C	T:C	G:G	A:G	A:A	C:C	T:T	G:G	C:C	A:G	A:A	A:A	A:A	G:A	G:G	C:C	T:T	C:C	T:T	G:G	C:A	A:A	T:C	G:G	T:A	T:C	A:A	C:T	G:G	T:T	G:A	A:G	G:G	T:C	A:C
1152	1_92	2019_2nd	train set	control	control	G:G	T:T	C:T	G:G	G:G	A:A	G:G	G:G	T:C	T:C	T:T	G:G	A:A	G:G	C:C	T:T	G:G	C:C	A:G	A:A	A:A	A:G	G:A	G:G	C:C	T:A	C:C	T:T	G:G	C:C	A:A	T:T	G:G	A:A	T:C	T:T	C:C	G:G	T:T	G:G	A:G	G:A	T:C	A:C
1153	1_93	2019_2nd	train set	control	control	G:G	T:T	C:C	G:G	G:G	A:A	G:G	G:G	T:C	T:C	T:C	G:G	A:A	A:A	C:C	T:T	G:G	C:C	A:G	A:A	A:A	A:A	G:A	G:A	C:T	T:T	C:C	T:T	G:G	C:C	A:A	T:C	G:G	T:T	T:C	A:A	C:T	G:G	T:T	G:A	A:G	G:G	T:C	A:C
1154	1_95	2019_2nd	train set	control	control	G:G	T:T	C:C	G:G	G:G	A:A	G:G	G:G	T:C	T:C	C:C	G:G	A:A	A:A	C:C	T:T	G:G	C:C	A:G	A:A	A:A	A:A	G:A	G:A	C:C	T:T	C:C	T:T	G:G	C:C	A:A	T:C	G:G	T:T	T:C	A:A	C:T	G:G	T:T	G:A	A:A	G:G	T:C	A:C
1155	1_96	2019_2nd	train set	control	control	G:G	T:T	T:T	G:G	G:G	A:A	G:G	G:G	T:C	T:C	T:T	G:G	A:A	A:A	C:C	T:T	G:G	C:C	A:G	A:A	A:A	A:G	G:A	G:A	T:T	T:A	C:C	T:T	G:G	C:C	A:A	T:T	G:G	T:A	T:C	T:T	C:C	G:G	T:T	G:A	A:A	G:G	T:C	A:A
1156	1_97	2019_2nd	train set	control	control	G:G	T:T	C:C	G:G	G:G	A:A	G:G	G:T	T:C	T:C	T:T	G:G	A:A	A:A	C:C	T:T	G:G	C:C	G:G	A:A	A:A	A:A	G:A	G:G	C:T	T:T	C:C	T:T	G:G	C:A	A:A	T:C	G:G	T:T	T:C	A:A	C:T	G:G	T:T	G:A	A:A	G:G	T:C	A:C
1157	1_98	2019_2nd	train set	control	control	G:G	T:T	C:C	G:G	G:G	A:A	G:G	G:T	T:C	T:C	C:C	G:G	A:G	A:A	C:C	T:T	G:G	C:C	A:G	A:A	A:A	A:A	G:A	G:G	C:C	T:T	C:C	T:T	G:G	C:A	A:A	T:C	G:G	T:A	T:C	A:A	C:T	G:G	T:T	G:G	A:G	G:G	T:C	A:C
1158	1_99	2019_2nd	train set	control	control	G:G	T:T	C:T	G:G	G:G	A:A	G:G	G:G	T:C	T:C	T:T	G:G	A:A	A:A	C:C	T:T	G:G	C:C	A:G	A:A	A:A	A:G	G:A	G:G	C:C	T:A	C:C	T:T	G:G	C:A	A:G	T:T	G:G	A:A	T:C	A:T	C:C	G:G	T:T	G:G	A:G	G:G	T:C	A:C
1159	1_100	2019_2nd	train set	control	control	G:G	T:T	C:C	G:G	G:G	A:A	G:G	G:T	T:T	T:C	T:T	G:G	A:A	A:A	C:C	T:T	G:G	C:C	A:G	A:A	A:A	A:A	G:A	G:G	C:C	T:T	C:C	T:T	G:G	C:A	A:A	T:C	G:G	T:T	T:C	A:A	C:T	G:G	T:T	G:A	A:G	G:G	T:C	C:C
1160	1_101	2019_2nd	train set	control	control	G:G	T:T	C:T	G:G	G:G	A:A	G:G	G:G	T:C	T:C	T:T	G:G	A:A	A:A	C:C	T:T	G:G	C:C	A:G	A:A	A:A	A:A	G:A	G:G	C:T	T:A	C:C	T:T	G:G	C:A	A:G	T:C	G:G	A:A	T:C	T:T	C:T	G:G	T:T	G:G	A:A	G:A	T:C	A:C
1161	1_102	2019_2nd	train set	control	control	G:G	T:T	C:T	G:G	G:G	A:A	G:G	G:G	T:C	T:C	T:T	G:G	A:A	A:A	C:C	T:T	G:G	C:C	A:G	A:A	A:A	A:A	G:A	G:G	C:T	T:A	C:C	T:T	G:G	C:C	A:A	T:C	G:G	A:A	T:C	T:T	C:T	G:G	T:T	G:G	A:A	G:G	T:C	C:C
1162	1_103	2019_2nd	train set	control	control	G:G	T:T	C:C	G:G	G:G	A:A	G:G	G:G	T:C	T:C	T:C	G:G	A:G	A:A	C:C	T:T	G:G	C:C	A:G	A:A	A:A	A:A	G:A	G:A	C:C	T:T	C:C	T:T	G:G	C:C	A:A	T:C	G:G	T:A	T:C	A:A	C:T	G:G	T:T	G:G	A:G	G:G	T:C	A:C
1163	1_104	2019_2nd	train set	control	control	No Call	T:T	C:C	G:G	G:G	A:A	G:G	G:G	T:C	T:C	T:T	G:G	A:G	A:A	C:C	T:T	G:G	C:C	A:G	A:A	A:A	A:A	G:A	G:A	C:C	T:T	C:C	T:T	G:G	C:C	A:A	T:C	G:G	T:T	T:C	A:A	C:T	G:G	T:T	G:A	A:A	G:G	T:C	C:C
1164	1_105	2019_2nd	train set	control	control	G:G	T:T	C:C	G:G	G:G	A:A	G:G	G:T	T:C	T:C	T:T	G:G	A:A	A:A	C:C	T:T	G:G	C:C	A:G	A:A	A:A	A:A	G:A	G:G	C:T	T:T	C:C	T:T	G:G	C:A	A:A	T:C	G:G	T:A	T:C	A:A	C:T	G:G	T:T	G:A	A:A	G:G	T:C	A:A
1165	1_106	2019_2nd	train set	control	control	No Call	T:T	C:C	G:G	G:G	A:A	G:G	G:G	T:C	T:C	T:T	G:G	A:A	A:A	C:C	T:T	G:G	T:T	G:G	A:A	A:A	A:A	G:A	G:G	T:T	T:T	C:C	T:T	G:G	C:A	A:A	T:T	G:G	T:T	T:C	A:A	C:C	G:T	T:T	G:G	A:A	G:G	T:C	C:C
1166	1_107	2019_2nd	train set	control	control	G:G	T:T	C:C	G:G	G:G	A:A	G:G	G:G	T:C	T:C	T:T	G:G	A:A	A:A	C:C	T:T	G:G	C:C	A:G	A:A	A:A	A:G	G:A	G:G	C:C	T:A	C:C	T:T	G:G	C:C	A:A	T:C	G:G	T:A	T:C	T:T	C:T	G:G	T:T	G:G	A:G	G:A	T:C	A:C
1167	1_108	2019_2nd	train set	control	control	G:G	T:T	C:C	G:G	G:G	A:A	G:G	G:G	T:C	T:C	T:T	G:G	A:A	A:A	C:C	T:T	G:G	C:C	A:G	A:A	A:A	A:A	G:A	G:G	T:T	T:T	C:C	T:T	G:G	C:C	A:A	T:C	G:G	T:T	T:C	A:T	C:T	G:G	T:T	G:G	A:A	G:G	T:C	A:A
1168	1_109	2019_2nd	train set	control	control	G:G	T:T	C:C	G:G	G:G	A:A	G:G	G:G	T:C	T:C	T:T	G:G	A:A	A:A	C:C	T:T	G:G	T:T	G:G	A:A	A:A	A:A	G:A	G:G	T:T	T:T	C:C	T:T	G:G	C:A	A:A	T:C	G:G	T:T	T:C	A:T	C:T	G:G	T:T	G:G	A:A	G:A	T:C	A:A
1169	1_110	2019_2nd	train set	control	control	G:G	T:T	C:C	G:G	G:G	A:A	G:G	G:T	T:C	T:C	C:C	G:G	A:A	A:A	C:C	T:T	G:G	C:C	A:G	A:A	A:A	A:A	G:A	G:G	C:C	T:T	C:C	T:T	G:G	C:C	A:A	T:C	G:G	T:A	T:C	A:A	C:T	G:G	T:T	G:G	A:A	G:G	T:C	A:C
1170	1_112	2019_2nd	train set	control	control	G:G	T:T	C:C	G:G	G:G	A:A	G:G	G:G	T:T	T:C	C:C	G:G	A:G	A:A	C:C	T:T	G:G	C:C	G:G	A:A	A:A	A:A	G:A	G:A	C:T	T:T	C:C	T:T	G:G	C:C	A:A	T:C	G:G	A:A	T:C	A:A	C:T	G:G	T:T	G:A	A:G	G:G	T:C	A:C
1171	1_113	2019_2nd	train set	control	control	G:G	T:T	C:C	G:G	G:G	A:A	G:G	G:G	T:T	T:C	T:T	G:G	A:A	G:G	C:C	T:T	G:G	C:C	A:G	A:A	A:A	A:G	G:A	G:G	C:C	T:T	C:C	T:T	G:G	C:A	A:A	C:C	G:G	T:A	T:C	A:A	C:T	G:G	T:T	G:G	A:A	G:G	T:C	A:C
1172	1_115	2019_2nd	test set	control	control	G:G	T:T	C:C	G:G	G:G	A:A	G:G	G:G	T:C	T:C	T:T	G:G	A:A	A:A	C:C	T:T	G:G	C:C	A:G	A:A	A:A	A:G	G:A	G:G	C:T	T:T	C:C	T:T	G:G	C:C	A:A	T:C	G:G	T:T	T:C	A:T	C:T	G:T	T:T	A:A	A:A	G:A	T:C	C:C
1173	1_116	2019_2nd	train set	control	control	No Call	T:T	C:C	G:G	G:G	A:A	G:G	G:T	T:T	T:C	C:C	G:G	A:A	A:A	C:C	T:T	G:G	C:C	A:G	A:A	A:A	A:A	G:A	G:G	C:C	T:T	C:C	T:T	G:G	C:A	A:A	T:C	G:G	A:A	T:C	A:A	C:T	G:G	T:T	G:A	A:G	G:G	T:C	C:C
1174	1_117	2019_2nd	train set	control	control	G:G	T:T	C:C	G:G	G:G	A:A	G:G	G:T	T:T	T:C	T:T	G:G	A:G	A:A	C:C	T:T	G:G	No Call	G:G	A:A	A:A	A:A	G:A	G:G	C:T	T:T	C:C	T:T	G:G	C:C	A:A	T:C	G:G	T:T	T:C	A:A	C:T	G:G	T:T	G:A	A:G	G:G	T:C	A:C
1175	1_118	2019_2nd	train set	control	control	G:G	T:T	T:T	G:G	G:G	A:A	G:G	G:G	T:C	T:C	T:T	G:G	A:A	A:A	C:C	T:T	G:G	C:C	A:G	A:A	A:A	G:G	G:A	G:A	T:T	T:T	C:C	T:T	G:G	C:C	A:A	T:T	G:G	T:A	T:C	T:T	C:C	G:G	T:T	A:A	A:A	G:G	T:C	A:A
1176	1_120	2019_2nd	train set	control	control	G:G	T:T	T:T	G:G	G:G	A:A	G:G	G:G	T:C	T:C	T:T	G:G	A:A	A:A	C:C	T:T	G:G	C:C	A:G	A:A	A:A	A:A	G:A	G:G	T:T	T:T	C:C	T:T	G:G	C:A	A:A	T:T	G:G	T:T	T:C	A:T	C:C	G:G	T:T	A:A	A:A	G:G	T:C	A:C
1177	1_121	2019_2nd	train set	control	control	No Call	T:T	C:C	G:G	G:G	A:A	G:G	G:G	T:T	T:C	T:T	G:G	A:A	A:A	C:C	T:T	G:G	C:C	A:G	A:A	A:A	A:G	G:A	G:G	C:T	T:T	C:C	T:T	G:G	C:A	A:A	T:T	G:G	T:T	T:C	A:T	C:C	G:T	T:T	A:A	A:A	G:A	T:C	C:C
1178	1_122	2019_2nd	train set	control	control	G:G	T:T	C:T	G:G	G:G	A:A	G:G	G:G	T:C	T:C	T:T	G:G	A:A	G:G	C:C	T:T	G:G	C:C	A:G	A:A	A:A	A:G	G:A	G:G	C:T	T:A	C:C	T:T	G:G	C:C	A:A	T:T	G:G	T:A	T:C	T:T	C:C	G:G	T:T	G:G	A:A	G:A	T:C	A:C
1179	1_123	2019_2nd	train set	control	control	G:G	T:T	C:C	G:G	G:G	A:A	G:G	G:G	T:C	T:C	T:T	G:G	A:G	A:A	C:C	T:T	G:G	No Call	G:G	A:A	A:A	A:A	G:A	G:A	C:T	T:T	C:C	T:T	G:G	C:A	A:A	T:C	G:G	T:A	T:C	A:A	C:T	G:G	T:T	G:A	A:A	G:G	T:C	A:A
1180	1_124	2019_2nd	train set	control	control	G:G	T:T	C:C	G:G	G:G	A:A	G:G	G:G	T:C	T:C	T:T	G:G	A:A	A:A	C:C	T:T	G:G	C:C	A:G	A:A	A:A	A:G	G:A	G:G	C:C	T:A	C:C	T:T	G:G	C:A	A:G	T:T	G:G	A:A	T:C	A:T	C:C	G:G	T:T	G:G	A:A	G:G	T:C	A:C
1181	1_125	2019_2nd	train set	control	control	G:G	T:T	C:C	G:G	G:G	A:A	G:G	G:T	T:C	T:C	C:C	G:G	A:A	A:A	C:C	T:T	G:G	C:C	A:G	A:A	A:A	A:A	G:A	G:G	C:C	T:T	C:C	T:T	G:G	C:A	A:A	T:C	G:G	T:T	T:C	A:A	C:T	G:G	T:T	G:G	A:A	G:G	T:C	A:C
1182	1_126	2019_2nd	train set	control	control	G:G	T:T	C:C	G:G	G:G	A:A	G:G	G:G	T:C	T:C	T:C	G:G	A:A	A:A	C:C	T:T	G:G	C:C	A:G	A:A	A:A	A:A	G:A	G:A	C:C	T:T	C:C	T:T	G:G	C:A	A:A	T:C	G:G	T:A	T:C	A:A	C:T	G:G	T:T	G:A	A:A	G:G	T:C	A:C
1183	1_127	2019_2nd	train set	control	control	No Call	T:T	C:C	G:G	G:G	A:A	G:G	G:G	T:C	T:C	T:C	G:G	A:G	A:A	C:C	T:T	G:G	C:C	A:G	A:A	A:A	A:A	G:A	G:A	C:C	T:T	C:C	T:T	G:G	C:A	A:A	T:C	G:G	T:T	T:C	A:A	C:T	G:G	T:T	G:A	A:A	G:G	T:C	C:C
1184	1_129	2019_2nd	train set	control	control	G:G	T:T	C:C	G:G	G:G	A:A	G:G	G:G	T:C	T:C	T:T	G:G	A:G	A:A	C:C	T:T	G:G	C:C	A:G	A:A	A:A	A:A	G:A	G:A	C:C	T:T	C:C	T:T	G:G	C:A	A:A	T:C	G:G	T:A	T:C	A:A	C:T	G:G	T:T	G:A	A:A	G:G	T:C	A:C
1185	1_130	2019_2nd	test set	control	control	No Call	T:T	C:C	G:G	G:G	A:A	G:G	G:G	T:T	T:C	T:T	G:G	A:G	A:A	C:C	T:T	G:G	C:C	A:G	A:A	A:A	A:A	G:A	G:A	C:C	T:T	C:C	T:T	G:G	C:A	A:A	T:C	G:G	A:A	T:C	A:A	C:T	G:G	T:T	G:A	A:G	G:G	T:C	C:C
1186	1_131	2019_2nd	train set	control	control	G:G	T:T	C:C	G:G	G:G	A:A	G:G	G:G	T:C	T:C	T:T	G:G	A:A	A:A	C:C	T:T	G:G	C:C	A:G	A:A	A:A	A:A	G:A	G:A	C:T	T:T	C:C	T:T	G:G	C:C	A:A	T:C	G:G	T:T	T:C	A:A	C:T	G:G	T:T	G:G	A:G	G:G	T:C	A:C
1187	1_132	2019_2nd	train set	control	control	G:G	T:T	C:C	G:G	G:G	A:A	G:G	G:G	T:C	T:C	T:T	G:G	A:A	A:A	C:C	T:T	G:G	C:C	A:G	A:A	A:A	A:G	G:A	G:G	C:T	T:T	C:C	T:T	G:G	C:A	A:A	T:T	G:G	A:A	T:C	A:A	C:C	G:G	T:T	A:A	A:A	G:A	T:C	A:C
1188	1_133	2019_2nd	train set	control	control	No Call	T:T	C:C	C:C	G:G	A:A	G:G	T:T	T:C	T:C	T:T	G:G	A:G	A:A	C:C	T:T	G:G	C:C	A:G	A:A	A:A	A:A	G:A	G:G	C:T	T:T	C:C	T:T	G:G	C:C	A:A	T:C	G:G	A:A	T:C	A:A	C:C	G:G	T:T	A:A	A:A	G:G	T:C	C:C
1189	1_134	2019_2nd	train set	control	control	No Call	T:T	C:C	G:G	G:G	A:A	G:G	G:T	T:C	T:C	T:T	G:G	A:G	A:A	C:C	T:T	G:G	C:C	A:G	A:A	A:A	A:A	G:A	G:G	C:C	T:T	C:C	T:T	G:G	C:A	A:A	T:C	G:G	A:A	T:C	A:A	C:T	G:G	T:T	G:A	A:A	G:G	T:C	C:C
1190	1_135	2019_2nd	train set	control	control	No Call	T:T	C:C	G:G	G:G	A:A	G:G	G:G	T:C	T:C	T:T	G:G	A:G	A:A	C:C	T:T	G:G	C:C	A:G	A:A	A:A	A:A	G:A	G:A	C:C	T:T	C:C	T:T	G:G	C:A	A:A	T:C	G:G	T:T	T:C	A:A	C:T	G:G	T:T	G:A	A:A	G:G	T:C	C:C
1191	1_136	2019_2nd	train set	control	control	G:G	T:T	C:C	G:G	G:G	A:A	G:G	G:G	T:T	T:C	T:T	G:G	A:A	A:A	C:C	T:T	G:G	C:C	G:G	A:A	A:A	A:A	G:A	G:A	C:T	T:T	C:C	T:T	G:G	C:C	A:A	T:C	G:G	T:A	T:C	A:A	C:T	G:G	T:T	G:A	A:G	G:G	T:C	A:C
1192	1_137	2019_2nd	train set	control	control	G:G	T:T	C:C	G:G	G:G	A:A	G:G	G:T	T:C	T:C	T:T	G:G	A:A	A:A	C:C	T:T	G:G	T:T	G:G	A:A	A:A	A:A	G:A	G:G	C:T	T:T	C:C	T:T	G:G	C:C	A:A	T:C	G:G	A:A	T:C	A:A	C:T	G:G	T:T	G:A	A:A	G:G	T:C	A:A
1193	1_138	2019_2nd	train set	control	control	G:G	T:T	C:C	G:G	G:G	A:A	G:G	G:G	T:C	T:C	T:T	G:G	A:A	A:A	C:C	T:T	G:G	No Call	G:G	A:A	A:A	A:A	G:A	G:A	C:T	T:T	C:C	T:T	G:G	C:A	A:A	T:C	G:G	T:T	T:C	A:A	C:T	G:G	T:T	G:A	A:A	G:G	T:C	A:C
1194	1_139	2019_2nd	train set	control	control	No Call	T:T	C:C	G:G	G:G	A:A	G:G	G:T	T:T	T:C	T:T	G:G	A:A	A:A	C:C	T:T	G:G	C:C	A:G	A:A	A:A	A:A	G:A	G:G	C:C	T:T	C:C	T:T	G:G	C:A	A:A	T:C	G:G	T:T	T:C	A:A	C:T	G:G	T:T	G:A	A:G	G:G	T:C	C:C
1195	1_140	2019_2nd	train set	control	control	G:G	T:T	C:C	G:G	G:G	A:A	G:G	G:G	T:C	T:C	T:T	G:G	A:A	A:A	T:T	T:T	G:G	C:C	A:G	A:A	A:A	A:A	G:A	G:G	C:T	T:T	C:C	T:T	G:G	C:C	A:A	T:T	G:G	T:T	T:C	A:A	C:C	G:G	T:T	A:A	A:A	G:A	T:C	A:C
1196	1_142	2019_2nd	train set	control	control	G:G	T:T	C:C	G:G	G:G	A:A	G:G	G:G	T:C	T:C	T:T	G:G	A:A	G:G	C:C	T:T	G:G	C:C	A:G	A:A	A:A	A:G	G:A	G:G	C:C	T:A	C:C	T:T	G:G	C:C	A:A	T:T	G:G	A:A	T:C	T:T	C:C	G:G	T:T	G:G	A:A	G:A	T:C	A:C
1197	1_143	2019_2nd	train set	control	control	No Call	T:T	C:C	G:G	G:G	A:A	G:G	G:G	T:C	T:C	T:T	G:G	A:A	A:A	C:C	T:T	G:G	C:C	A:G	A:A	A:A	A:A	G:A	G:G	C:T	T:T	C:C	T:T	G:G	C:A	A:A	T:C	G:G	A:A	T:C	A:T	C:T	G:T	T:T	G:G	A:A	G:G	T:C	C:C
1198	1_144	2019_2nd	train set	control	control	G:G	T:T	C:C	G:G	G:G	A:A	G:G	G:G	T:C	T:C	C:C	G:G	A:G	A:A	C:C	T:T	G:G	C:C	G:G	A:A	A:A	A:A	G:A	G:A	C:T	T:T	C:C	T:T	G:G	C:C	A:A	T:C	G:G	A:A	T:C	A:A	C:T	G:G	T:T	G:A	A:A	G:G	T:C	C:C
1199	1_145	2019_2nd	test set	control	case	G:G	T:T	C:T	G:G	G:G	A:A	G:G	G:G	T:C	T:C	T:T	G:G	A:A	A:A	C:C	T:T	G:G	C:C	A:G	A:A	A:A	A:G	G:A	G:G	C:C	T:A	C:C	T:T	G:G	C:A	A:G	T:T	G:G	A:A	T:C	A:T	C:C	G:G	T:T	G:G	A:A	G:A	T:C	A:C
1200	1_146	2019_2nd	train set	control	control	G:G	T:T	C:C	G:G	G:G	A:A	G:G	G:G	T:C	T:C	T:C	G:G	A:A	A:A	C:C	T:T	G:G	C:C	A:G	A:A	A:A	A:A	G:A	G:A	C:C	T:T	C:C	T:T	G:G	C:A	A:A	T:C	G:G	T:T	T:C	A:A	C:T	G:G	T:T	G:G	A:A	G:G	T:C	A:C
1201	1_147	2019_2nd	train set	control	control	G:G	T:T	C:C	G:G	G:G	A:A	G:G	G:T	T:C	T:C	T:T	G:G	A:A	A:A	C:C	T:T	G:G	T:T	G:G	A:A	A:A	A:A	G:A	G:G	C:T	T:T	C:C	T:T	G:G	C:A	A:A	T:C	G:G	T:T	T:C	A:A	C:T	G:G	T:T	G:G	A:A	G:G	T:C	A:C
1202	1_148	2019_2nd	train set	control	control	G:G	T:T	C:C	G:G	G:G	A:A	G:G	G:T	T:C	T:C	T:T	G:G	A:G	A:A	C:C	T:T	G:G	C:C	G:G	A:A	A:A	A:A	G:A	G:G	C:T	T:T	C:C	T:T	G:G	C:C	A:A	T:C	G:G	T:A	T:C	A:A	C:T	G:G	T:T	G:G	A:A	G:G	T:C	A:C
1203	1_149	2019_2nd	train set	control	control	G:G	T:T	C:C	G:G	G:G	A:A	G:G	G:G	T:C	T:C	T:T	G:G	A:A	A:A	C:C	T:T	G:G	T:T	G:G	A:A	A:A	A:A	G:A	G:A	C:T	T:T	C:C	T:T	G:G	C:A	A:A	T:C	G:G	T:A	T:C	A:A	C:T	G:G	T:T	G:A	A:A	G:G	T:C	A:A
1204	1_150	2019_2nd	train set	control	control	No Call	T:T	C:C	G:C	G:G	A:A	G:G	G:T	T:C	T:C	T:T	G:G	A:A	A:A	C:C	T:T	G:G	T:T	G:G	A:A	A:A	A:A	G:A	G:G	C:T	T:T	C:C	T:T	G:G	C:C	A:A	T:T	G:G	A:A	T:C	A:A	C:C	G:G	T:G	G:G	A:A	G:G	T:C	C:C
1205	1_151	2019_2nd	train set	control	control	G:G	T:T	C:C	G:G	G:G	A:A	G:G	G:T	T:C	T:C	T:T	G:G	A:G	A:A	C:C	T:T	G:G	C:C	G:G	A:A	A:A	A:A	G:A	G:G	C:T	T:T	C:C	T:T	G:G	C:C	A:A	T:C	G:G	T:T	T:C	A:A	C:T	G:G	T:T	G:A	A:A	G:G	T:C	A:C
1206	1_152	2019_2nd	train set	control	control	G:G	T:T	C:C	G:G	G:G	A:A	G:G	G:T	T:C	T:C	T:T	G:G	A:A	A:A	C:C	T:T	G:G	C:C	A:G	A:A	A:A	A:A	G:A	G:G	C:T	T:T	C:C	T:T	G:G	C:A	A:A	T:C	G:G	T:T	T:C	A:A	C:T	G:G	T:T	G:A	A:A	G:G	T:C	A:C
1207	1_153	2019_2nd	train set	control	control	G:G	T:T	C:C	G:G	G:G	A:A	G:G	G:G	T:T	T:C	T:T	G:G	A:A	A:A	C:C	T:T	G:G	C:C	A:G	A:A	A:A	A:G	G:A	G:G	T:T	T:T	C:C	T:T	G:G	C:C	A:A	T:T	G:G	T:T	T:C	A:A	C:C	G:T	T:T	A:A	A:A	G:G	T:C	A:C
1208	1_154	2019_2nd	train set	control	control	G:G	T:T	C:C	G:G	G:G	A:A	G:G	G:T	T:T	T:C	T:T	G:G	A:A	A:A	C:C	T:T	G:G	C:C	A:G	A:A	A:A	A:A	G:A	G:G	C:T	T:T	C:C	T:T	G:G	C:A	A:A	T:C	G:G	T:T	T:C	A:A	C:T	G:G	T:T	G:A	A:G	G:G	T:C	C:C
1209	1_155	2019_2nd	train set	control	control	G:G	T:T	C:C	G:G	G:G	A:A	G:G	G:T	T:C	T:C	No Call	G:G	A:A	A:A	C:C	T:T	G:G	C:C	A:G	A:A	A:A	A:A	G:A	G:G	C:T	T:T	C:C	T:T	G:G	C:C	A:A	T:C	G:G	T:T	T:C	A:A	C:T	G:G	T:T	G:G	A:A	G:G	T:C	A:C
1210	1_156	2019_2nd	train set	control	control	G:G	T:T	C:C	G:G	G:G	A:A	G:G	G:G	T:C	T:C	T:C	G:G	A:G	A:A	C:C	T:T	G:G	C:C	A:G	A:A	A:A	A:A	G:A	G:A	C:C	T:T	C:C	T:T	G:G	C:C	A:A	T:C	G:G	T:A	T:C	A:A	C:T	G:G	T:T	G:A	A:A	G:G	T:C	A:C
1211	1_157	2019_2nd	train set	control	control	G:G	T:T	C:C	G:G	G:G	A:A	G:G	G:T	T:C	T:C	T:T	G:G	A:A	A:A	C:C	T:T	G:G	C:C	A:G	A:A	A:A	A:A	G:A	G:G	C:C	T:T	C:C	T:T	G:G	C:C	A:A	T:C	G:G	A:A	T:C	A:A	C:T	G:G	T:T	G:G	A:A	G:G	T:C	A:A
1212	1_158	2019_2nd	train set	control	control	G:G	T:T	C:C	G:G	G:G	A:A	G:G	G:T	T:C	T:C	T:T	G:G	A:G	A:A	C:C	T:T	G:G	C:C	A:G	A:A	A:A	A:A	G:A	G:G	C:C	T:T	C:C	T:T	G:G	C:C	A:A	T:C	G:G	A:A	T:C	A:A	C:T	G:G	T:T	G:A	A:A	G:G	T:C	C:C
1213	1_159	2019_2nd	train set	control	control	G:G	T:T	C:C	G:G	G:G	A:A	G:G	G:G	T:C	T:C	T:T	G:G	A:A	A:A	C:C	T:T	G:G	C:C	G:G	A:A	A:A	A:A	G:A	G:A	C:T	T:T	C:C	T:T	G:G	C:A	A:A	T:C	G:G	T:A	T:C	A:A	C:T	G:G	T:T	G:G	A:A	G:G	T:C	C:C
1214	1_161	2019_2nd	train set	control	control	G:G	T:T	C:C	G:G	G:G	A:A	G:G	G:G	T:C	T:C	T:T	G:G	A:A	A:A	C:C	T:T	G:G	C:C	A:G	A:A	A:A	A:A	G:A	G:A	C:C	T:T	C:C	T:T	G:G	C:C	A:A	T:C	G:G	A:A	T:C	A:A	C:T	G:G	T:T	G:A	A:A	G:G	T:C	A:C
1215	1_162	2019_2nd	train set	control	control	No Call	T:T	C:C	G:G	G:G	A:A	G:G	G:G	T:C	T:C	T:T	G:G	A:A	A:A	C:C	T:T	G:G	C:C	A:G	A:A	A:A	A:G	G:A	G:G	C:T	T:T	C:C	T:T	G:G	C:C	A:A	T:T	G:G	T:T	T:C	A:T	C:C	G:T	T:T	G:G	A:A	G:A	T:C	C:C
1216	1_163	2019_2nd	train set	control	control	G:G	T:T	C:C	G:G	G:G	A:A	G:G	G:T	T:C	T:C	T:T	G:G	A:G	A:A	C:C	T:T	G:G	C:C	A:G	A:A	A:A	A:A	G:A	G:G	C:T	T:T	C:C	T:T	G:G	C:C	A:A	T:C	G:G	T:A	T:C	A:A	C:T	G:G	T:T	G:G	A:A	G:G	T:C	A:C
1217	1_166	2019_2nd	train set	control	control	G:G	T:T	C:C	G:G	G:G	A:A	G:G	G:T	T:C	T:C	T:T	G:G	A:A	A:A	C:C	T:T	G:G	C:C	A:G	A:A	A:A	A:A	G:A	G:G	C:C	T:T	C:C	T:T	G:G	C:A	A:A	T:C	G:G	T:T	T:C	A:A	C:T	G:G	T:T	G:A	A:G	G:G	T:C	A:C
1218	1_167	2019_2nd	train set	control	control	G:G	T:T	C:C	G:G	G:G	A:A	G:G	G:T	T:C	T:C	T:C	G:G	A:G	A:A	C:C	T:T	G:G	No Call	G:G	A:A	A:A	A:A	G:A	G:G	C:T	T:T	C:C	T:T	G:G	C:A	A:A	T:C	G:G	T:A	T:C	A:A	C:T	G:G	T:T	G:G	A:G	G:G	T:C	A:A
1219	2_2	2019_2nd	train set	control	control	G:G	T:T	C:C	G:G	G:G	A:A	G:G	G:G	T:C	T:C	T:T	G:G	A:A	A:A	C:C	T:T	G:G	C:C	A:G	A:A	A:A	A:A	G:A	G:A	C:C	T:T	C:C	T:T	G:G	C:A	A:A	T:C	G:G	T:T	T:C	A:A	C:T	G:G	T:T	G:A	A:A	G:G	T:C	A:C
1220	2_3	2019_2nd	train set	control	control	G:G	T:T	C:C	G:G	G:G	A:A	G:G	G:T	T:C	T:C	T:T	G:G	A:G	A:A	C:C	T:T	G:G	C:C	A:G	A:A	A:A	A:A	G:A	G:G	C:C	T:T	C:C	T:T	G:G	C:A	A:A	T:C	G:G	T:T	T:C	A:A	C:T	G:G	T:T	G:A	A:A	G:G	T:C	A:C
1221	2_4	2019_2nd	train set	control	control	G:G	T:T	C:C	G:G	G:G	A:A	G:G	G:T	T:C	T:C	T:T	G:G	A:G	A:A	C:C	T:T	G:G	C:C	A:G	A:A	A:A	A:A	G:A	G:G	C:T	T:T	C:C	T:T	G:G	C:C	A:A	T:C	G:G	T:A	T:C	A:A	C:T	G:G	T:T	G:A	A:A	G:G	T:C	A:C
1222	2_5	2019_2nd	train set	control	control	G:G	T:T	C:T	G:G	G:G	A:A	G:G	G:G	T:C	T:C	T:T	G:G	A:A	A:A	C:C	T:T	G:G	C:C	A:G	A:A	A:A	A:G	G:A	G:G	C:T	T:T	C:C	T:T	G:G	C:C	A:A	T:C	G:G	T:T	T:C	T:T	C:T	G:G	T:T	G:G	A:G	G:G	T:C	A:A
1223	2_6	2019_2nd	train set	control	control	G:G	T:T	C:C	G:G	G:G	A:A	G:G	G:T	T:C	T:C	T:C	G:G	A:G	A:A	C:C	T:T	G:G	C:C	A:G	A:A	A:A	A:A	G:A	G:G	C:T	T:T	C:C	T:T	G:G	C:C	A:A	T:C	G:G	T:A	T:C	A:A	C:T	G:G	T:T	G:A	A:A	G:G	T:C	A:C
1224	2_7	2019_2nd	test set	control	case	G:G	T:T	C:C	G:G	G:G	A:A	G:G	G:T	T:T	T:C	T:T	G:G	A:A	A:A	C:C	T:T	G:G	C:C	A:G	A:A	A:A	A:A	G:A	G:G	C:C	T:T	C:C	T:T	G:G	C:A	A:A	T:C	G:G	T:T	T:C	A:A	C:T	G:G	T:T	G:A	A:G	G:G	T:C	A:C
1225	2_8	2019_2nd	train set	control	control	G:G	T:T	C:C	G:G	G:G	A:A	G:G	G:G	T:C	T:C	T:T	G:G	A:A	A:G	C:C	T:T	G:G	C:C	A:G	A:A	A:A	A:A	G:A	G:G	C:C	T:T	C:C	T:T	G:G	C:A	A:G	T:C	G:G	T:A	T:C	A:T	C:T	G:G	T:T	G:G	A:A	G:G	T:C	A:C
1226	2_9	2019_2nd	train set	control	control	G:G	T:T	C:C	G:G	G:G	A:A	G:G	G:G	T:C	T:C	T:T	G:G	A:A	A:A	C:C	T:T	G:G	C:C	A:G	A:A	A:A	A:G	G:A	G:G	C:T	T:T	C:C	T:T	G:G	C:A	A:A	T:T	G:G	A:A	T:C	A:T	C:C	G:T	T:T	G:G	A:A	G:A	T:C	A:C
1227	2_10	2019_2nd	train set	control	control	G:G	T:T	C:T	G:G	G:G	A:A	G:G	G:G	T:C	T:C	T:T	G:G	A:A	A:G	C:C	T:T	G:G	C:C	A:G	A:A	A:A	A:G	G:A	G:G	C:T	T:A	C:C	T:T	G:G	C:A	A:G	T:T	G:G	A:A	T:C	A:T	C:C	G:G	T:T	G:G	A:G	G:A	T:C	C:C
1228	2_11	2019_2nd	train set	control	control	G:G	T:T	C:T	G:G	G:G	A:A	G:G	G:G	T:C	T:C	T:T	G:G	A:A	A:A	C:C	T:T	G:G	C:C	A:G	A:A	A:A	A:G	G:A	G:A	T:T	T:A	C:C	T:T	G:G	C:A	A:A	T:T	G:G	T:T	T:C	A:T	C:C	G:G	T:T	A:A	A:A	G:G	T:C	A:C
1229	2_12	2019_2nd	train set	control	control	G:G	T:T	C:T	G:G	G:G	A:A	G:G	G:G	T:C	T:C	T:T	G:G	A:A	A:G	C:C	T:T	G:G	C:C	A:G	A:A	A:A	A:A	G:A	G:G	C:T	T:A	C:C	T:T	G:G	C:A	A:A	T:C	G:G	T:A	T:C	A:T	C:T	G:G	T:T	No Call	A:A	G:G	T:C	C:C
1230	2_13	2019_2nd	train set	control	control	G:G	T:T	C:C	G:G	G:G	A:A	G:G	G:T	T:C	T:C	T:T	G:G	A:G	A:A	C:C	T:T	G:G	C:C	A:G	A:A	A:A	A:A	G:A	G:G	C:C	T:T	C:C	T:T	G:G	C:A	A:A	T:C	G:G	T:T	T:C	A:A	C:T	G:G	T:T	G:A	A:A	G:G	T:C	A:C
1231	2_14	2019_2nd	train set	control	control	G:G	T:T	T:T	G:G	G:G	A:A	G:G	G:G	T:C	T:C	T:T	G:G	A:A	A:A	C:C	T:T	G:G	C:C	A:G	A:A	A:A	G:G	G:A	G:A	T:T	T:T	C:C	T:T	G:G	C:A	A:A	T:T	G:G	T:T	T:C	A:T	C:C	G:G	T:T	A:A	A:A	G:G	T:C	A:C
1232	2_15	2019_2nd	train set	control	control	G:G	T:T	C:C	G:G	G:G	A:A	G:G	G:G	T:C	T:C	T:T	G:G	A:A	A:G	C:C	T:T	G:G	C:C	A:G	A:A	A:A	A:A	G:A	G:G	C:C	T:A	C:C	T:T	G:G	C:A	A:G	T:C	G:G	A:A	T:C	A:T	C:T	G:G	T:T	G:G	A:G	G:A	T:C	A:C
1233	2_16	2019_2nd	train set	control	control	G:G	T:T	C:C	G:G	G:G	A:A	G:G	G:G	T:T	T:C	T:T	G:G	A:A	G:G	C:C	T:T	G:G	C:C	A:G	A:A	A:A	A:A	G:A	G:G	C:C	T:T	C:C	T:T	G:G	C:A	A:A	T:T	G:G	T:A	T:C	A:A	C:T	G:G	T:T	G:G	A:G	G:A	T:C	C:C
1234	2_18	2019_2nd	train set	control	control	G:G	T:T	C:C	G:G	G:G	A:A	G:G	G:T	T:C	T:C	T:C	G:G	A:A	A:A	C:C	T:T	G:G	C:C	A:G	A:A	A:A	A:A	G:A	G:G	C:T	T:T	C:C	T:T	G:G	C:A	A:A	T:C	G:G	T:A	T:C	A:A	C:T	G:G	T:T	G:G	A:A	G:G	T:C	A:C
1235	2_19	2019_2nd	train set	control	control	G:G	T:T	C:C	G:G	G:G	A:A	G:G	G:G	T:C	T:C	T:C	G:G	A:G	A:A	C:C	T:T	G:G	C:C	A:G	A:A	A:A	A:A	G:A	G:A	C:C	T:T	C:C	T:T	G:G	C:A	A:A	T:C	G:G	T:A	T:C	A:A	C:T	G:G	T:T	G:A	A:G	G:G	T:C	A:C
1236	2_20	2019_2nd	train set	control	control	G:G	T:T	C:C	G:G	G:G	A:A	G:G	G:G	T:C	T:C	T:T	G:G	A:A	A:A	C:C	T:T	G:G	C:C	A:G	A:A	A:A	A:A	G:A	G:G	T:T	T:T	C:C	T:T	G:G	C:A	A:A	T:C	G:G	A:A	T:C	A:T	C:T	G:G	T:T	G:G	A:A	G:G	T:C	A:C
1237	2_21	2019_2nd	train set	control	control	G:G	T:T	C:C	G:G	G:G	A:A	G:G	G:T	T:C	T:C	T:T	G:G	A:A	A:A	C:C	T:T	G:G	C:C	A:G	A:A	A:A	A:A	G:A	G:G	C:C	T:T	C:C	T:T	G:G	C:A	A:A	T:C	G:G	T:T	T:C	A:A	C:T	G:G	T:T	G:A	A:A	G:G	T:C	A:C
1238	2_22	2019_2nd	train set	control	control	G:G	T:T	C:C	G:G	G:G	A:A	G:G	G:G	T:C	T:C	T:T	G:G	A:A	A:G	C:C	T:T	G:G	C:C	A:G	A:A	A:A	A:A	G:A	G:G	C:C	T:A	C:C	T:T	G:G	C:A	A:A	T:T	G:G	A:A	T:C	A:T	C:C	G:G	T:T	G:G	A:G	G:G	T:C	A:A
1239	2_23	2019_2nd	train set	control	control	G:G	T:T	C:C	G:G	G:G	A:A	G:G	G:G	T:T	T:C	T:T	G:G	A:A	A:A	T:T	T:T	G:G	C:C	A:G	A:A	A:A	A:G	G:A	G:G	C:T	T:T	C:C	T:T	G:G	C:C	A:A	T:T	G:G	A:A	T:C	A:A	C:C	G:G	T:T	A:A	A:A	G:A	T:C	A:C
1240	2_24	2019_2nd	test set	control	control	No Call	T:T	C:C	G:G	G:G	A:A	G:G	G:G	T:C	T:C	T:T	G:G	A:A	A:A	C:C	T:T	G:G	T:T	G:G	A:A	A:A	A:A	G:A	G:G	T:T	T:T	C:C	T:T	G:G	C:A	A:A	T:T	G:G	A:A	T:C	A:T	C:C	G:T	T:T	A:A	A:A	G:A	T:C	C:C
1241	2_25	2019_2nd	train set	control	control	No Call	T:T	C:C	G:G	G:G	A:A	G:G	G:T	T:C	T:C	T:T	G:G	A:A	A:A	C:C	T:T	G:G	C:C	A:G	A:A	A:A	A:A	G:A	G:G	C:C	T:T	C:C	T:T	G:G	C:C	A:A	T:C	G:G	T:T	T:C	A:A	C:T	G:G	T:T	G:A	A:G	G:G	T:C	C:C
1242	2_26	2019_2nd	train set	control	control	G:G	T:T	C:C	G:G	G:G	A:A	G:G	G:G	T:C	T:C	T:T	G:G	A:G	A:A	C:C	T:T	G:G	C:C	A:G	A:A	A:A	A:A	G:A	G:A	C:C	T:T	C:C	T:T	G:G	C:A	A:A	T:C	G:G	T:T	T:C	A:A	C:T	G:G	T:T	G:A	A:A	G:G	T:C	A:C
1243	2_27	2019_2nd	test set	control	case	G:G	T:T	C:C	G:G	G:G	A:A	G:G	G:G	T:C	T:C	T:T	G:G	A:A	A:A	C:C	T:T	G:G	C:C	A:G	A:A	A:A	A:A	G:A	G:A	C:C	T:T	C:C	T:T	G:G	C:C	A:A	T:C	G:G	T:T	T:C	A:A	C:T	G:G	T:T	G:A	A:G	G:G	T:C	A:C
1244	2_28	2019_2nd	train set	control	control	G:G	T:T	C:C	G:G	G:G	A:A	G:G	G:T	T:T	T:C	T:T	G:G	A:A	A:A	C:C	T:T	G:G	C:C	A:G	A:A	A:A	A:A	G:A	G:G	C:C	T:T	C:C	T:T	G:G	C:C	A:A	T:C	G:G	T:T	T:C	A:A	C:T	G:G	T:T	G:A	A:G	G:G	T:C	A:C
1245	2_29	2019_2nd	train set	control	control	G:G	T:T	C:T	G:G	G:G	A:A	G:G	G:G	T:C	T:C	T:T	G:G	A:A	A:A	C:C	T:T	G:G	C:C	A:G	A:A	A:A	A:G	G:A	G:G	C:T	T:T	C:C	T:T	G:G	C:C	A:G	T:T	G:G	A:A	T:C	T:T	C:C	G:G	T:T	G:G	A:A	G:A	T:C	A:C
1246	2_30	2019_2nd	train set	control	control	G:G	T:T	C:C	G:G	G:G	A:A	G:G	G:T	T:C	T:C	T:T	G:G	A:G	A:A	C:C	T:T	G:G	C:C	A:G	A:A	A:A	A:A	G:A	G:G	C:C	T:T	C:C	T:T	G:G	C:C	A:A	T:C	G:G	T:A	T:C	A:A	C:T	G:G	T:T	G:G	A:A	G:G	T:C	A:C
1247	2_31	2019_2nd	train set	control	control	G:G	T:T	T:T	G:G	G:G	A:A	G:G	G:G	T:C	T:C	T:T	G:G	A:A	A:A	C:C	T:T	G:G	C:C	A:G	A:A	A:A	A:G	G:A	G:G	T:T	T:T	C:C	T:T	G:G	C:C	A:A	T:T	G:G	T:A	T:C	T:T	C:C	G:G	T:T	G:G	A:A	G:G	T:C	A:C
1248	2_32	2019_2nd	train set	control	control	G:G	T:T	C:C	G:G	G:G	A:A	G:G	G:G	T:C	T:C	T:T	G:G	A:A	A:A	C:C	T:T	G:G	C:C	A:G	A:A	A:A	A:A	G:A	G:G	T:T	T:T	C:C	T:T	G:G	C:C	A:A	T:T	G:G	T:T	T:C	A:T	C:C	G:G	T:T	A:A	A:A	G:G	T:C	A:C
1249	2_33	2019_2nd	train set	control	control	G:G	T:T	C:C	G:G	G:G	A:A	G:G	G:G	T:C	T:C	T:T	G:G	A:G	A:A	C:C	T:T	G:G	C:C	A:G	A:A	A:A	A:A	G:A	G:A	C:C	T:T	C:C	T:T	G:G	C:C	A:A	T:C	G:G	T:A	T:C	A:A	C:T	G:G	T:T	G:G	A:A	G:G	T:C	A:C
1250	2_34	2019_2nd	train set	control	control	G:G	T:T	C:C	G:G	G:G	A:A	G:G	G:G	T:C	T:C	T:C	G:G	A:G	A:A	C:C	T:T	G:G	C:C	A:G	A:A	A:A	A:A	G:A	G:A	C:C	T:T	C:C	T:T	G:G	C:C	A:A	T:C	G:G	T:A	T:C	A:A	C:T	G:G	T:T	G:G	A:A	G:G	T:C	A:A
1251	2_35	2019_2nd	train set	control	control	G:G	T:T	C:C	G:G	G:G	A:A	G:G	G:G	T:C	T:C	T:T	G:G	A:A	A:G	C:C	T:T	G:G	C:C	A:G	A:A	A:A	G:G	G:A	G:G	C:C	T:T	C:C	T:T	G:G	C:A	A:A	T:C	G:G	T:A	T:C	A:A	C:T	G:G	T:T	G:A	A:A	G:A	T:C	C:C
1252	2_36	2019_2nd	train set	control	control	G:G	T:T	C:C	G:G	G:G	A:A	G:G	G:T	T:C	T:C	T:T	G:G	A:G	A:A	C:C	T:T	G:G	T:T	G:G	A:A	A:A	A:A	G:A	G:G	C:T	T:T	C:C	T:T	G:G	C:A	A:A	T:C	G:G	A:A	T:C	A:A	C:T	G:G	T:T	G:A	A:A	G:G	T:C	A:A
1253	2_37	2019_2nd	train set	control	control	No Call	T:T	C:C	G:G	G:G	A:A	G:G	G:T	T:T	T:C	T:T	G:G	A:A	A:A	C:C	T:T	G:G	C:C	A:G	A:A	A:A	A:A	G:A	G:G	C:C	T:T	C:C	T:T	G:G	C:A	A:A	T:C	G:G	T:T	T:C	A:A	C:T	G:G	T:T	G:A	A:G	G:G	T:C	C:C
1254	2_38	2019_2nd	train set	control	control	G:G	T:T	C:C	G:G	G:G	A:A	G:G	G:G	T:C	T:C	T:T	G:G	A:A	A:A	C:C	T:T	G:G	C:C	A:G	A:A	A:A	A:A	G:A	G:G	C:T	T:T	C:C	T:T	G:G	C:C	A:A	T:T	G:G	T:T	T:C	A:T	C:C	G:G	T:T	G:G	A:A	G:G	T:C	A:C
1255	2_39	2019_2nd	train set	control	control	G:G	T:T	C:C	G:G	G:G	A:A	G:G	G:T	T:C	T:C	T:T	G:G	A:A	A:A	C:C	T:T	G:G	C:C	A:G	A:A	A:A	A:A	G:A	G:G	C:C	T:T	C:C	T:T	G:G	C:C	A:A	T:C	G:G	T:T	T:C	A:A	C:T	G:G	T:T	G:A	A:A	G:G	T:C	A:C
1256	2_40	2019_2nd	train set	control	control	G:G	T:T	C:T	G:G	G:G	A:A	G:G	G:G	T:C	T:C	T:T	G:G	A:A	A:A	C:C	T:T	G:G	C:C	A:G	A:A	A:A	A:A	G:A	G:G	C:T	T:A	C:C	T:T	G:G	C:C	A:A	T:C	G:G	A:A	T:C	T:T	C:T	G:G	T:T	G:G	A:A	G:A	T:C	A:C
1257	2_41	2019_2nd	train set	control	control	No Call	T:T	C:C	C:C	G:G	A:A	G:G	G:T	T:C	T:C	T:T	G:G	A:G	A:A	C:C	T:T	G:G	C:C	G:G	A:A	A:A	A:A	G:A	G:G	C:T	T:T	C:C	T:T	G:G	C:C	A:A	C:C	G:G	A:A	T:C	A:T	C:C	G:G	T:G	G:G	A:A	G:A	T:C	C:C
1258	2_42	2019_2nd	train set	control	control	No Call	T:T	C:C	G:G	G:G	A:A	G:G	G:T	T:C	T:C	T:C	G:G	A:A	A:A	C:C	T:T	G:G	C:C	A:G	A:A	A:A	A:A	G:A	G:G	C:T	T:T	C:C	T:T	G:G	C:A	A:A	T:C	G:G	A:A	T:C	A:A	C:T	G:G	T:T	G:A	A:A	G:G	T:C	C:C
1259	2_43	2019_2nd	train set	control	control	G:G	T:T	C:C	G:G	G:G	A:A	G:G	G:G	T:C	T:C	T:T	G:G	A:A	G:G	C:C	T:T	G:G	C:C	A:G	A:A	A:A	A:A	G:A	G:G	C:T	T:A	C:C	T:T	G:G	C:C	A:G	T:C	G:G	A:A	T:C	T:T	C:T	G:G	T:T	G:G	A:A	G:A	T:C	A:A
1260	2_44	2019_2nd	train set	control	control	G:G	T:T	C:C	G:G	G:G	A:A	G:G	G:G	T:C	T:C	T:C	G:G	A:G	A:A	C:C	T:T	G:G	C:C	A:G	A:A	A:A	A:A	G:A	G:A	C:C	T:T	C:C	T:T	G:G	C:C	A:A	T:C	G:G	A:A	T:C	A:A	C:T	G:G	T:T	G:A	A:A	G:G	T:C	A:A
1261	2_45	2019_2nd	train set	control	control	G:G	T:T	C:C	G:G	G:G	A:A	G:G	G:G	T:T	T:C	T:T	G:G	A:A	A:A	C:C	T:T	G:G	C:C	A:G	A:A	A:A	A:G	G:A	G:G	C:T	T:T	C:C	T:T	G:G	C:A	A:A	T:T	G:G	T:T	T:C	A:T	C:C	G:T	T:T	G:G	A:A	G:G	T:C	A:C
1262	2_47	2019_2nd	train set	control	control	G:G	T:T	C:C	G:G	G:G	A:A	G:G	G:T	T:C	T:C	T:C	G:G	A:A	A:A	C:C	T:T	G:G	C:C	A:G	A:A	A:A	A:A	G:A	G:G	C:C	T:T	C:C	T:T	G:G	C:C	A:A	T:C	G:G	T:A	T:C	A:A	C:T	G:G	T:T	G:A	A:A	G:G	T:C	A:C
1263	2_48	2019_2nd	train set	control	control	G:G	T:T	C:C	G:G	G:G	A:A	G:G	G:G	T:C	T:C	T:T	G:G	A:A	A:A	C:C	T:T	G:G	C:C	A:G	A:A	A:A	A:G	G:A	G:G	C:T	T:T	C:C	T:T	G:G	C:A	A:A	T:T	G:G	A:A	T:C	A:T	C:C	G:G	T:T	A:A	A:A	G:G	T:C	A:A
1264	2_49	2019_2nd	test set	control	control	G:G	T:T	C:C	G:G	G:G	A:A	G:G	G:T	T:C	T:C	T:T	G:G	A:A	A:A	C:C	T:T	G:G	T:T	G:G	A:A	A:A	A:A	G:A	G:G	C:T	T:T	C:C	T:T	G:G	C:A	A:A	T:C	G:G	T:T	T:C	A:A	C:T	G:G	T:T	G:A	A:A	G:G	T:C	A:C
1265	2_50	2019_2nd	train set	control	control	G:G	T:T	C:C	G:G	G:G	A:A	G:G	G:T	T:C	T:C	T:C	G:G	A:A	A:A	C:C	T:T	G:G	C:C	A:G	A:A	A:A	A:A	G:A	G:G	C:T	T:T	C:C	T:T	G:G	C:A	A:A	T:C	G:G	A:A	T:C	A:A	C:T	G:G	T:T	G:A	A:A	G:G	T:C	A:C
1266	2_51	2019_2nd	train set	control	control	G:G	T:T	T:T	G:G	G:G	A:A	G:G	G:G	T:C	T:C	T:T	G:G	A:A	A:A	C:C	T:T	G:G	C:C	A:G	A:A	A:A	A:G	G:A	G:G	C:T	T:T	C:C	T:T	G:G	C:C	A:G	T:T	G:G	T:T	T:C	A:A	C:T	G:G	T:T	A:A	A:A	G:G	T:C	A:A
1267	2_52	2019_2nd	train set	control	control	No Call	T:T	C:C	G:G	G:G	A:A	G:G	G:G	T:T	T:C	T:T	G:G	A:A	A:A	C:C	T:T	G:G	C:C	A:G	A:A	A:A	A:G	G:A	G:G	C:T	T:T	C:C	T:T	G:G	C:A	A:A	T:T	G:G	T:T	T:C	A:T	C:C	G:T	T:T	A:A	A:A	G:A	T:C	C:C
1268	2_53	2019_2nd	test set	control	control	G:G	T:T	C:C	G:G	G:G	A:A	G:G	G:G	T:C	T:C	T:T	G:G	A:G	A:A	C:C	T:T	G:G	C:C	A:G	A:A	A:A	A:A	G:A	G:A	C:C	T:T	C:C	T:T	G:G	C:C	A:A	T:C	G:G	T:T	T:C	A:A	C:T	G:G	T:T	G:A	A:A	G:G	T:C	A:C
1269	2_54	2019_2nd	train set	control	control	G:G	T:T	C:T	G:G	G:G	A:A	G:G	G:G	T:C	T:C	T:T	G:G	A:A	A:A	C:C	T:T	G:G	C:C	A:G	A:A	A:A	A:A	G:A	G:G	C:T	T:T	C:C	T:T	G:G	C:A	A:A	T:C	G:G	A:A	T:C	A:T	C:T	G:G	T:T	G:G	A:A	G:A	T:C	A:C
1270	2_55	2019_2nd	test set	control	case	G:G	T:T	C:C	G:G	G:G	A:A	G:G	G:G	T:T	T:C	T:T	G:G	A:A	A:A	C:C	T:T	G:G	C:C	A:G	A:A	A:A	A:A	G:A	G:G	T:T	T:T	C:C	T:T	G:G	C:C	A:A	T:C	G:G	T:T	T:C	A:T	C:T	G:T	T:T	G:G	A:A	G:G	T:C	A:C
1271	2_56	2019_2nd	train set	control	control	G:G	T:T	C:C	G:G	G:G	A:A	G:G	G:T	T:C	T:C	T:T	G:G	A:G	A:A	C:C	T:T	G:G	C:T	G:G	A:A	A:A	A:A	G:A	G:G	C:T	T:T	C:C	T:T	G:G	C:C	A:A	T:C	G:G	T:T	T:C	A:A	C:T	G:G	T:T	G:A	A:A	G:G	T:C	A:C
1272	2_57	2019_2nd	train set	control	control	No Call	T:T	C:C	G:G	G:G	A:A	G:G	G:T	T:T	T:C	T:T	G:G	A:A	A:A	C:C	T:T	G:G	C:C	A:G	A:A	A:A	A:A	G:A	G:G	C:T	T:T	C:C	T:T	G:G	C:A	A:A	T:C	G:G	T:A	T:C	A:A	C:T	G:G	T:T	G:A	A:G	G:G	T:C	C:C
1273	2_58	2019_2nd	train set	control	control	G:G	T:T	C:C	G:G	G:G	A:A	G:G	G:G	T:C	T:C	T:T	G:G	A:A	A:A	C:C	T:T	G:G	C:C	A:G	A:A	A:A	A:A	G:A	G:A	C:C	T:T	C:C	T:T	G:G	C:C	A:A	T:C	G:G	T:T	T:C	A:A	C:T	G:G	T:T	G:A	A:G	G:G	T:C	A:C
1274	2_59	2019_2nd	train set	control	control	G:G	T:T	C:C	G:G	G:G	A:A	G:G	G:G	T:C	T:C	T:T	G:G	A:A	A:A	C:C	T:T	G:G	C:C	A:G	A:A	A:A	A:A	G:A	G:G	C:C	T:T	C:C	T:T	G:G	C:A	A:G	T:T	G:G	T:A	T:C	A:T	C:C	G:G	T:T	G:G	A:A	G:A	T:C	C:C
1275	2_61	2019_2nd	train set	control	control	G:G	T:T	C:C	G:G	G:G	A:A	G:G	G:T	T:T	T:C	T:T	G:G	A:A	A:A	C:C	T:T	G:G	C:C	A:G	A:A	A:A	A:A	G:A	G:G	C:T	T:T	C:C	T:T	G:G	C:A	A:A	T:C	G:G	A:A	T:C	A:A	C:T	G:G	T:T	G:G	A:G	G:G	T:C	A:C
1276	2_62	2019_2nd	train set	control	control	G:G	T:T	C:C	G:G	G:G	A:A	G:G	G:G	T:C	T:C	T:T	G:G	A:G	A:A	C:C	T:T	G:G	C:C	A:G	A:A	A:A	A:A	G:A	G:A	C:T	T:T	C:C	T:T	G:G	C:C	A:A	T:C	G:G	T:T	T:C	A:A	C:T	G:G	T:T	G:A	A:G	G:G	T:C	A:A
1277	2_63	2019_2nd	train set	control	control	G:G	T:T	C:C	G:G	G:G	A:A	G:G	G:T	T:C	T:C	T:T	G:G	A:G	A:A	C:C	T:T	G:G	C:C	A:G	A:A	A:A	A:A	G:A	G:G	C:C	T:T	C:C	T:T	G:G	C:C	A:A	T:C	G:G	T:A	T:C	A:A	C:T	G:G	T:T	G:A	A:A	G:G	T:C	A:C
1278	2_64	2019_2nd	train set	control	control	No Call	T:T	C:C	C:C	G:G	A:A	G:G	G:T	T:C	T:C	T:T	G:G	A:G	A:A	C:C	T:T	G:G	C:C	A:G	A:A	A:A	A:A	G:A	G:G	C:T	T:T	C:C	T:T	G:G	C:C	A:A	C:C	G:G	A:A	T:C	A:A	C:C	G:G	T:G	G:G	A:A	G:G	T:C	C:C
1279	2_65	2019_2nd	train set	control	control	G:G	T:T	C:C	G:G	G:G	A:A	G:G	G:T	T:C	T:C	T:T	G:G	A:A	A:A	C:C	T:T	G:G	C:C	A:G	A:A	A:A	A:A	G:A	G:G	C:C	T:T	C:C	T:T	G:G	C:C	A:A	T:C	G:G	T:T	T:C	A:A	C:T	G:G	T:T	G:A	A:A	G:G	T:C	A:C
1280	2_66	2019_2nd	train set	control	control	G:G	T:T	C:C	G:G	G:G	A:A	G:G	G:G	T:C	T:C	T:T	G:G	A:A	A:A	C:C	T:T	G:G	C:C	A:G	A:A	A:A	A:A	G:A	G:A	C:C	T:T	C:C	T:T	G:G	C:C	A:A	T:C	G:G	T:T	T:C	A:A	C:T	G:G	T:T	G:A	A:A	G:G	T:C	A:C
1281	2_67	2019_2nd	train set	control	control	G:G	T:T	C:C	G:G	G:G	A:A	G:G	G:T	T:C	T:C	T:T	G:G	A:G	A:A	C:C	T:T	G:G	C:C	A:G	A:A	A:A	A:A	G:A	G:G	C:T	T:T	C:C	T:T	G:G	C:A	A:A	T:C	G:G	T:A	T:C	A:A	C:T	G:G	T:T	G:A	A:A	G:G	T:C	A:C
1282	2_69	2019_2nd	train set	control	control	G:G	T:T	C:C	G:G	G:G	A:A	G:G	G:T	T:C	T:C	T:C	G:G	A:A	A:A	C:C	T:T	G:G	C:C	A:G	A:A	A:A	A:A	G:A	G:G	C:C	T:T	C:C	T:T	G:G	C:A	A:A	T:C	G:G	T:T	T:C	A:A	C:T	G:G	T:T	G:A	A:A	G:G	T:C	A:C
1283	2_70	2019_2nd	train set	control	control	G:G	T:T	C:C	G:G	G:G	A:A	G:G	G:G	T:T	T:C	T:T	G:G	A:A	A:A	T:T	T:T	G:G	C:C	A:G	A:A	A:A	A:G	G:A	G:G	C:T	T:T	C:C	T:T	G:G	C:C	A:A	T:T	G:G	T:T	T:C	A:A	C:C	G:T	T:T	A:A	A:A	G:A	T:C	C:C
1284	2_71	2019_2nd	train set	control	control	G:G	T:T	C:C	G:G	G:G	A:A	G:G	G:T	T:C	T:C	T:T	G:G	A:A	A:A	C:C	T:T	G:G	C:C	A:G	A:A	A:A	A:A	G:A	G:G	C:C	T:T	C:C	T:T	G:G	C:C	A:A	T:C	G:G	A:A	T:C	A:A	C:T	G:G	T:T	G:A	A:G	G:G	T:C	A:A
1285	2_72	2019_2nd	train set	control	control	G:G	T:T	C:C	G:G	G:G	A:A	G:G	G:T	T:C	T:C	T:T	G:G	A:G	A:A	C:C	T:T	G:G	C:C	A:G	A:A	A:A	A:A	G:A	G:G	C:C	T:T	C:C	T:T	G:G	C:A	A:A	T:C	G:G	T:T	T:C	A:A	C:T	G:G	T:T	G:G	A:A	G:G	T:C	A:C
1286	2_73	2019_2nd	train set	control	control	G:G	T:T	C:C	G:G	G:G	A:A	G:G	G:T	T:C	T:C	T:C	G:G	A:G	A:A	C:C	T:T	G:G	C:C	A:G	A:A	A:A	A:A	G:A	G:G	C:C	T:T	C:C	T:T	G:G	C:A	A:A	T:C	G:G	T:T	T:C	A:A	C:T	G:G	T:T	G:G	A:A	G:G	T:C	A:C
1287	2_74	2019_2nd	train set	control	control	G:G	T:T	C:C	G:G	G:G	A:A	G:G	G:G	T:T	T:C	T:T	G:G	A:A	A:A	C:C	T:T	G:G	C:C	A:G	A:A	A:A	A:G	G:A	G:G	C:T	T:T	C:C	T:T	G:G	C:A	A:A	T:C	G:G	T:T	T:C	A:T	C:T	G:T	T:T	G:G	A:A	G:A	T:C	C:C
1288	2_76	2019_2nd	train set	control	control	G:G	T:T	C:C	G:G	G:G	A:A	G:G	G:G	T:C	T:C	T:C	G:G	A:A	A:A	C:C	T:T	G:G	C:C	A:G	A:A	A:A	A:A	G:A	G:A	C:C	T:T	C:C	T:T	G:G	C:C	A:A	T:C	G:G	T:T	T:C	A:A	C:T	G:G	T:T	G:A	A:A	G:G	T:C	C:C
1289	2_77	2019_2nd	train set	control	control	G:G	T:T	C:C	G:G	G:G	A:A	G:G	G:T	T:C	T:C	T:C	G:G	A:A	A:A	C:C	T:T	G:G	C:C	A:G	A:A	A:A	A:A	G:A	G:G	C:C	T:T	C:C	T:T	G:G	C:A	A:A	T:C	G:G	T:T	T:C	A:A	C:T	G:G	T:T	G:G	A:A	G:G	T:C	C:C
1290	2_78	2019_2nd	train set	control	control	G:G	T:T	C:C	G:G	G:G	A:A	G:G	G:G	T:C	T:C	T:T	G:G	A:A	A:A	C:C	T:T	G:G	C:C	A:G	A:A	A:A	A:A	G:A	G:G	C:T	T:T	C:C	T:T	G:G	C:A	A:A	T:C	G:G	T:T	T:C	A:A	C:T	G:T	T:T	A:A	A:A	G:G	T:C	A:C
1291	2_79	2019_2nd	train set	control	control	G:G	T:T	T:T	G:G	G:G	A:A	G:G	G:G	T:C	T:C	T:T	G:G	A:A	A:A	C:C	T:T	G:G	C:C	A:G	A:A	A:A	A:G	G:A	G:G	T:T	A:A	C:C	T:T	G:G	C:C	A:A	T:T	G:A	T:T	T:C	A:T	C:C	G:G	T:T	G:G	A:A	G:A	T:C	C:C
1292	2_80	2019_2nd	train set	control	control	G:G	T:T	C:C	G:G	G:G	A:A	G:G	G:G	T:C	T:C	T:T	G:G	A:G	A:A	C:C	T:T	G:G	C:C	A:G	A:A	A:A	A:A	G:A	G:A	C:C	T:T	C:C	T:T	G:G	C:A	A:A	T:C	G:G	T:T	T:C	A:A	C:T	G:G	T:T	G:A	A:A	G:G	T:C	A:C
1293	2_81	2019_2nd	train set	control	control	G:G	T:T	C:C	G:G	G:G	A:A	G:G	G:T	T:C	T:C	T:T	G:G	A:A	A:A	C:C	T:T	G:G	C:C	A:G	A:A	A:A	A:A	G:A	G:G	C:C	T:T	C:C	T:T	G:G	C:A	A:A	T:C	G:G	T:T	T:C	A:A	C:T	G:G	T:T	G:A	A:A	G:G	T:C	A:A
1294	2_82	2019_2nd	train set	control	control	G:G	T:T	C:C	G:G	G:G	A:A	G:G	G:T	T:C	T:C	T:T	G:G	A:A	A:A	C:C	T:T	G:G	C:C	A:G	A:A	A:A	A:A	G:A	G:G	C:C	T:T	C:C	T:T	G:G	C:C	A:A	T:C	G:G	T:A	T:C	A:A	C:T	G:G	T:T	G:A	A:G	G:G	T:C	C:C
1295	2_83	2019_2nd	train set	control	control	G:G	T:T	C:C	G:G	G:G	A:A	G:G	G:G	T:T	T:C	T:T	G:G	A:A	A:A	C:C	T:T	G:G	C:C	A:G	A:A	A:A	A:A	G:A	G:G	T:T	T:T	C:C	T:T	G:G	C:A	A:A	T:T	G:G	T:T	T:C	A:T	C:C	G:T	T:T	A:A	A:A	G:G	T:C	A:C
1296	2_84	2019_2nd	train set	control	control	G:G	T:T	C:C	G:G	G:G	A:A	G:G	G:G	T:C	T:C	T:T	G:G	A:A	A:A	C:C	T:T	G:G	C:C	A:G	A:A	A:A	A:A	G:A	G:G	C:C	T:T	C:C	T:T	G:G	C:C	A:A	T:C	G:G	T:A	T:C	T:T	C:T	G:G	T:T	G:G	A:G	G:A	T:C	A:A
1297	2_85	2019_2nd	train set	control	control	No Call	T:T	C:C	G:G	G:G	A:A	G:G	G:G	T:C	T:C	T:C	G:G	A:A	A:A	C:C	T:T	G:G	C:C	A:G	A:A	A:A	A:A	G:A	G:A	C:C	T:T	C:C	T:T	G:G	C:C	A:A	T:C	G:G	T:A	T:C	A:A	C:T	G:G	T:T	G:A	A:A	G:G	T:C	C:C
1298	2_86	2019_2nd	train set	control	control	G:G	T:T	C:C	G:G	G:G	A:A	G:G	G:G	T:C	T:C	T:T	G:G	A:A	A:A	C:C	T:T	G:G	C:C	A:G	A:A	A:A	A:A	G:A	G:G	C:T	T:T	C:C	T:T	G:G	C:C	A:A	T:C	G:G	A:A	T:C	A:T	C:T	G:G	T:T	A:A	A:A	G:G	T:C	A:A
1299	2_88	2019_2nd	train set	control	control	G:G	T:T	C:C	G:G	G:G	A:A	G:G	G:G	T:C	T:C	T:T	G:G	A:A	A:A	C:C	T:T	G:G	C:C	A:G	A:A	A:A	A:A	G:A	G:G	C:C	T:A	C:C	T:T	G:G	C:C	A:A	T:C	G:G	A:A	T:C	T:T	C:T	G:G	T:T	G:G	A:A	G:G	T:C	C:C
1300	2_89	2019_2nd	train set	control	control	No Call	T:T	C:C	G:G	G:G	A:A	G:G	G:G	T:C	T:C	T:T	G:G	A:A	A:A	C:C	T:T	G:G	C:C	A:G	A:A	A:A	A:G	G:A	G:G	C:T	T:T	C:C	T:T	G:G	C:C	A:A	T:C	G:G	A:A	T:C	A:T	C:T	G:T	T:T	A:A	A:A	G:A	T:C	C:C
1301	2_90	2019_2nd	train set	control	control	G:G	T:T	C:C	G:G	G:G	A:A	G:G	G:G	T:C	T:C	T:T	G:G	A:A	A:A	C:C	T:T	G:G	C:C	A:G	A:A	A:A	A:G	G:A	G:G	C:T	T:T	C:C	T:T	G:G	C:C	A:A	T:T	G:G	T:T	T:C	A:T	C:C	G:G	T:T	G:G	A:G	G:G	T:C	A:A
1302	2_91	2019_2nd	train set	control	control	No Call	T:T	C:C	G:G	G:G	A:A	G:G	G:G	T:C	T:C	T:T	G:G	A:A	A:A	C:C	T:T	G:G	C:C	A:G	A:A	A:A	A:G	G:A	G:G	C:T	T:T	C:C	T:T	G:G	C:C	A:A	T:C	G:G	T:T	T:C	A:A	C:T	G:T	T:T	G:G	A:A	G:G	T:C	C:C
1303	2_92	2019_2nd	train set	control	control	G:G	T:T	C:T	G:G	G:G	A:A	G:G	G:G	T:C	T:C	T:T	G:G	A:A	G:G	C:C	T:T	G:G	C:C	A:G	A:A	A:A	A:G	G:A	G:G	C:T	T:A	C:C	T:T	G:G	C:C	A:A	T:T	G:G	A:A	T:C	T:T	C:C	G:G	T:T	G:G	A:G	G:A	T:C	C:C
1304	2_93	2019_2nd	train set	control	control	G:G	T:T	C:C	G:G	G:G	A:A	G:G	G:G	T:C	T:C	T:T	G:G	A:A	A:A	C:C	T:T	G:G	C:C	A:G	A:A	A:A	A:G	G:A	G:G	C:T	T:T	C:C	T:T	G:G	C:A	A:A	T:C	G:G	T:T	T:C	A:T	C:T	G:T	T:T	A:A	A:A	G:A	T:C	A:C
1305	2_94	2019_2nd	train set	control	control	G:G	T:T	C:C	G:G	G:G	A:A	G:G	G:T	T:C	T:C	T:C	G:G	A:G	A:A	C:C	T:T	G:G	C:C	A:G	A:A	A:A	A:A	G:A	G:G	C:C	T:T	C:C	T:T	G:G	C:A	A:A	T:C	G:G	T:T	T:C	A:A	C:T	G:G	T:T	G:A	A:A	G:G	T:C	A:C
1306	2_96	2019_2nd	test set	control	case	No Call	T:T	C:C	G:G	G:G	A:A	G:G	G:T	T:C	T:C	T:C	G:G	A:G	A:A	C:C	T:T	G:G	C:C	A:G	A:A	A:A	A:A	G:A	G:G	C:C	T:T	C:C	T:T	G:G	C:A	A:A	T:C	G:G	T:T	T:C	A:A	C:T	G:G	T:T	G:A	A:A	G:G	T:C	C:C
1307	2_97	2019_2nd	train set	control	control	G:G	T:T	C:C	G:G	G:G	A:A	G:G	G:G	T:T	T:C	T:T	G:G	A:A	A:A	C:C	T:T	G:G	C:C	A:G	A:A	A:A	A:G	G:A	G:G	C:T	T:T	C:C	T:T	G:G	C:C	A:A	T:T	G:G	A:A	T:C	A:T	C:C	G:G	T:T	A:A	A:A	G:A	T:C	A:C
1308	2_98	2019_2nd	train set	control	control	G:G	T:T	C:C	G:G	G:G	A:A	G:G	G:T	T:C	T:C	T:T	G:G	A:A	A:A	C:C	T:T	G:G	C:C	A:G	A:A	A:A	A:A	G:A	G:G	C:C	T:T	C:C	T:T	G:G	C:A	A:A	T:C	G:G	T:T	T:C	A:A	C:T	G:G	T:T	G:G	A:A	G:G	T:C	A:C
1309	2_99	2019_2nd	train set	control	control	G:G	T:T	C:T	G:G	G:G	A:A	G:G	G:G	T:C	T:C	T:T	G:G	A:A	A:A	C:C	T:T	G:G	C:C	A:G	A:A	A:A	A:G	G:A	G:G	C:T	T:A	C:C	T:T	G:G	C:A	A:A	T:T	G:G	A:A	T:C	A:T	C:C	G:G	T:T	G:G	A:A	G:A	T:C	A:A
1310	2_100	2019_2nd	train set	control	control	G:G	T:T	C:C	G:G	G:G	A:A	G:G	G:G	T:C	T:C	T:T	G:G	A:A	A:A	C:C	T:T	G:G	C:C	A:G	A:A	A:A	A:A	G:A	G:A	C:C	T:T	C:C	T:T	G:G	C:A	A:A	T:C	G:G	A:A	T:C	A:A	C:T	G:G	T:T	G:A	A:A	G:G	T:C	A:C
1311	2_101	2019_2nd	train set	control	control	G:G	T:T	C:C	G:G	G:G	A:A	G:G	G:G	T:T	T:C	T:T	G:G	A:A	A:A	C:C	T:T	G:G	C:C	A:G	A:A	A:A	A:G	G:A	G:G	C:T	T:T	C:C	T:T	G:G	C:C	A:A	T:T	G:G	A:A	T:C	A:T	C:C	G:G	T:T	A:A	A:A	G:G	T:C	A:C
1312	2_102	2019_2nd	train set	control	control	G:G	T:T	C:C	G:G	G:G	A:A	G:G	G:G	T:C	T:C	T:C	G:G	A:G	A:A	C:C	T:T	G:G	C:C	A:G	A:A	A:A	A:A	G:A	G:A	C:C	T:T	C:C	T:T	G:G	C:A	A:A	T:C	G:G	T:A	T:C	A:A	C:T	G:G	T:T	G:A	A:A	G:G	T:C	A:C
1313	2_103	2019_2nd	train set	control	control	G:G	T:T	C:C	G:G	G:G	A:A	G:G	G:T	T:C	T:C	T:C	G:G	A:A	A:A	C:C	T:T	G:G	C:C	A:G	A:A	A:A	A:A	G:A	G:G	C:C	T:T	C:C	T:T	G:G	C:C	A:A	T:C	G:G	T:T	T:C	A:A	C:T	G:G	T:T	G:A	A:A	G:G	T:C	A:C
1314	2_104	2019_2nd	train set	control	control	G:G	T:T	C:C	G:G	G:G	A:A	G:G	G:G	T:T	T:C	T:T	G:G	A:A	A:A	C:T	T:T	G:G	C:C	A:G	A:A	A:A	A:A	G:A	G:G	T:T	T:T	C:C	T:T	G:G	C:C	A:A	T:T	G:G	T:A	T:C	A:T	C:C	G:G	T:T	A:A	A:A	G:A	T:C	A:C
1315	2_106	2019_2nd	train set	control	control	G:G	T:T	C:C	G:G	G:G	A:A	G:G	G:G	T:C	T:C	T:T	G:G	A:A	A:A	C:C	T:T	G:G	C:C	A:G	A:A	A:A	A:G	G:A	G:G	C:T	T:T	C:C	T:T	G:G	C:C	A:A	T:C	G:G	T:T	T:C	A:A	C:T	G:T	T:T	G:G	A:A	G:G	T:C	C:C
1316	2_107	2019_2nd	train set	control	control	G:G	T:T	C:C	G:G	G:G	A:A	G:G	G:G	T:C	T:C	T:T	G:G	A:A	A:A	C:C	T:T	G:G	C:C	A:G	A:A	A:A	A:A	G:A	G:G	C:C	T:A	C:C	T:T	G:G	C:C	A:A	T:C	G:G	A:A	T:C	T:T	C:T	G:G	T:T	G:G	A:A	G:G	T:C	A:C
1317	2_109	2019_2nd	train set	control	control	G:G	T:T	C:C	G:G	G:G	A:A	G:G	G:G	T:T	T:C	T:T	G:G	A:A	A:A	C:C	T:T	G:G	C:C	A:G	A:A	A:A	A:G	G:A	G:G	C:T	T:T	C:C	T:T	G:G	C:C	A:A	T:C	G:G	T:A	T:C	A:T	C:T	G:T	T:T	A:A	A:A	G:G	T:C	A:C
1318	2_110	2019_2nd	train set	control	control	G:G	T:T	C:C	G:G	G:G	A:A	G:G	G:T	T:C	T:C	T:T	G:G	A:A	A:A	C:C	T:T	G:G	T:T	G:G	A:A	A:A	A:A	G:A	G:G	C:T	T:T	C:C	T:T	G:G	C:A	A:A	T:C	G:G	A:A	T:C	A:A	C:T	G:G	T:T	G:A	A:A	G:G	T:C	A:C
1319	2_111	2019_2nd	train set	control	control	G:G	T:T	C:C	G:G	G:G	A:A	G:G	G:G	T:C	T:C	T:T	G:G	A:A	A:A	C:C	T:T	G:G	T:T	G:G	A:A	A:A	A:A	G:A	G:A	C:T	T:T	C:C	T:T	G:G	C:A	A:A	T:C	G:G	A:A	T:C	A:A	C:T	G:G	T:T	G:A	A:A	G:G	T:C	A:A
1320	2_113	2019_2nd	train set	control	control	G:G	T:T	C:C	G:G	G:G	A:A	G:G	G:T	T:C	T:C	T:T	G:G	A:G	A:A	C:C	T:T	G:G	C:C	A:G	A:A	A:A	A:A	G:A	G:G	C:C	T:T	C:C	T:T	G:G	C:C	A:A	T:T	G:G	A:A	T:C	A:T	C:C	G:G	T:G	A:A	A:G	G:A	T:C	A:C
1321	2_114	2019_2nd	train set	control	control	G:G	T:T	C:C	G:G	G:G	A:A	G:G	G:T	T:C	T:C	T:T	G:G	A:G	A:A	C:C	T:T	G:G	C:C	A:G	A:A	A:A	A:A	G:A	G:G	C:T	T:T	C:C	T:T	G:G	C:C	A:A	T:C	G:G	T:A	T:C	A:A	C:T	G:G	T:T	G:A	A:A	G:G	T:C	A:C
1322	2_115	2019_2nd	train set	control	control	G:G	T:T	C:C	G:G	G:G	A:A	G:G	G:T	T:C	T:C	T:T	G:G	A:A	A:A	C:C	T:T	G:G	C:C	A:G	A:A	A:A	A:A	G:A	G:G	C:C	T:T	C:C	T:T	G:G	C:A	A:A	T:C	G:G	A:A	T:C	A:A	C:T	G:G	T:T	G:A	A:A	G:G	T:C	A:C
1323	2_116	2019_2nd	train set	control	control	G:G	T:T	T:T	G:G	G:G	A:A	G:G	G:G	T:C	T:C	T:T	G:G	A:A	A:A	C:C	T:T	G:G	C:C	A:G	A:A	A:A	G:G	G:A	G:A	T:T	T:A	C:C	T:T	G:G	C:C	A:A	T:T	G:G	T:T	T:C	A:T	C:C	G:G	T:T	G:G	A:A	G:G	T:C	A:C
1324	2_117	2019_2nd	train set	control	control	G:G	T:T	C:C	G:G	G:G	A:A	G:G	G:T	T:C	T:C	T:C	G:G	A:A	A:A	C:C	T:T	G:G	C:C	A:G	A:A	A:A	A:A	G:A	G:G	C:C	T:T	C:C	T:T	G:G	C:A	A:A	T:C	G:G	T:T	T:C	A:A	C:T	G:G	T:T	G:A	A:G	G:G	T:C	A:A
1325	2_118	2019_2nd	train set	control	control	G:G	T:T	C:C	G:G	G:G	A:A	G:G	G:G	T:T	T:C	T:C	G:G	A:A	A:A	C:C	T:T	G:G	C:T	G:G	A:A	A:A	A:A	G:A	G:A	C:T	T:T	C:C	T:T	G:G	C:C	A:A	T:C	G:G	T:A	T:C	A:A	C:T	G:G	T:T	G:A	A:G	G:G	T:C	A:C
1326	2_119	2019_2nd	test set	control	case	G:G	T:T	C:C	G:C	G:G	A:A	G:G	T:T	T:C	T:C	T:T	G:G	A:A	A:A	C:C	T:T	G:G	C:C	G:G	A:A	A:A	A:A	G:A	G:G	C:T	T:T	C:C	T:T	G:G	C:C	A:A	C:C	G:G	A:A	T:C	A:T	C:C	G:G	G:G	A:A	A:G	G:A	T:C	A:C
1327	2_120	2019_2nd	train set	control	control	G:G	T:T	C:C	G:G	G:G	A:A	G:G	G:G	T:C	T:C	T:T	G:G	A:A	A:A	C:C	T:T	G:G	C:C	A:G	A:A	A:A	A:A	G:A	G:G	C:C	T:T	C:C	T:T	G:G	C:C	A:A	T:C	G:G	T:A	T:C	T:T	C:T	G:G	T:T	G:G	A:A	G:G	T:C	C:C
1328	2_121	2019_2nd	train set	control	control	No Call	T:T	C:C	G:G	G:G	A:A	G:G	G:G	T:C	T:C	T:T	G:G	A:A	A:A	T:T	T:T	G:G	C:C	A:G	A:A	A:A	A:A	G:A	G:G	C:T	T:T	C:C	T:T	G:G	C:A	A:A	T:T	G:G	A:A	T:C	A:A	C:C	G:T	T:T	A:A	A:A	G:A	T:C	C:C
1329	2_122	2019_2nd	train set	control	control	G:G	T:T	C:C	G:G	G:G	A:A	G:G	G:T	T:T	T:C	T:T	G:G	A:G	A:A	C:C	T:T	G:G	C:C	A:G	A:A	A:A	A:A	G:A	G:G	C:C	T:T	C:C	T:T	G:G	C:A	A:A	T:C	G:G	A:A	T:C	A:A	C:T	G:G	T:T	G:A	A:G	G:G	T:C	C:C
1330	2_123	2019_2nd	train set	control	control	G:G	T:T	C:T	G:G	G:G	A:A	G:G	G:G	T:C	T:C	T:T	G:G	A:A	G:G	C:C	T:T	G:G	C:C	A:G	A:A	A:A	A:G	G:A	G:G	C:T	T:A	C:C	T:T	G:G	C:C	A:A	T:T	G:G	A:A	T:C	T:T	C:C	G:G	T:T	G:G	A:A	G:G	T:C	C:C
1331	2_124	2019_2nd	train set	control	control	G:G	T:T	C:C	G:G	G:G	A:A	G:G	G:G	T:C	T:C	T:T	G:G	A:A	A:A	C:C	T:T	G:G	C:C	A:G	A:A	A:A	A:G	G:A	G:G	C:C	T:T	C:C	T:T	G:G	C:A	A:A	T:T	G:G	A:A	T:C	A:T	C:C	G:G	T:T	G:G	A:A	G:A	T:C	A:C
1332	2_125	2019_2nd	train set	control	control	G:G	T:T	C:C	G:G	G:G	A:A	G:G	G:G	T:C	T:C	T:T	G:G	A:A	A:A	C:C	T:T	G:G	C:C	A:G	A:A	A:A	A:G	G:A	G:G	C:T	T:T	C:C	T:T	G:G	C:C	A:A	T:C	G:G	T:T	T:C	A:T	C:T	G:T	T:T	A:A	A:A	G:G	T:C	A:C
1333	2_126	2019_2nd	train set	control	control	No Call	T:T	C:C	G:G	G:G	A:A	G:G	G:T	T:C	T:C	C:C	G:G	A:A	A:A	C:C	T:T	G:G	C:T	G:G	A:A	A:A	A:A	G:A	G:G	C:T	T:T	C:C	T:T	G:G	C:C	A:A	T:C	G:G	T:T	T:C	A:A	C:T	G:G	T:T	G:A	A:A	G:G	T:C	C:C
1334	2_127	2019_2nd	train set	control	control	G:G	T:T	C:C	G:G	G:G	A:A	G:G	G:G	T:C	T:C	T:T	G:G	A:A	A:A	C:C	T:T	G:G	C:C	A:G	A:A	A:A	A:A	G:A	G:A	C:C	T:T	C:C	T:T	G:G	C:C	A:A	T:C	G:G	T:A	T:C	A:A	C:T	G:G	T:T	G:A	A:A	G:G	T:C	A:C
1335	3_6	2019_2nd	train set	control	control	G:G	T:T	C:C	G:G	G:G	A:A	G:G	G:G	T:C	T:C	T:T	G:G	A:A	A:A	C:C	T:T	G:G	T:T	G:G	A:A	A:A	A:A	G:A	G:A	C:T	T:T	C:C	T:T	G:G	C:A	A:A	T:C	G:G	T:T	T:C	A:A	C:T	G:G	T:T	G:A	A:A	G:G	T:C	A:C
1336	3_7	2019_2nd	train set	control	control	G:G	T:T	C:C	G:G	G:G	A:A	G:G	G:T	T:C	T:C	T:T	G:G	A:A	A:A	C:C	T:T	G:G	C:C	A:G	A:A	A:A	A:A	G:A	G:G	C:C	T:T	C:C	T:T	G:G	C:C	A:A	T:C	G:G	T:A	T:C	A:A	C:T	G:G	T:T	G:A	A:A	G:G	T:C	A:C
1337	3_8	2019_2nd	test set	control	control	G:G	T:T	C:C	G:G	G:G	A:A	G:G	G:G	T:C	T:C	C:C	G:G	A:A	A:A	C:C	T:T	G:G	C:C	A:G	A:A	A:A	A:A	G:A	G:A	C:T	T:T	C:C	T:T	G:G	C:C	A:A	T:C	G:G	T:T	T:C	A:A	C:T	G:G	T:T	G:A	A:G	G:G	T:C	A:C
1338	3_9	2019_2nd	train set	control	control	G:G	T:T	C:C	G:G	G:G	A:A	G:G	G:T	T:C	T:C	C:C	G:G	A:A	A:A	C:C	T:T	G:G	C:C	A:G	A:A	A:A	A:A	G:A	G:G	C:C	T:T	C:C	T:T	G:G	C:C	A:A	T:C	G:G	T:T	T:C	A:A	C:T	G:G	T:T	G:A	A:A	G:G	T:C	A:C
1339	3_10	2019_2nd	train set	control	control	G:G	T:T	C:T	G:G	G:G	A:A	G:G	G:G	T:C	T:C	T:T	G:G	A:A	A:G	C:C	T:T	G:G	C:C	A:G	A:A	A:A	A:G	G:A	G:G	C:C	T:A	C:C	T:T	G:G	C:A	A:A	T:T	G:G	A:A	T:C	A:T	C:C	G:G	T:T	G:G	A:G	G:A	T:C	A:C
1340	3_11	2019_2nd	train set	control	control	G:G	T:T	C:C	G:G	G:G	A:A	G:G	G:T	T:T	T:C	T:T	G:G	A:A	A:A	C:C	T:T	G:G	C:T	G:G	A:A	A:A	A:A	G:A	G:G	T:T	T:A	C:C	T:T	G:G	C:C	A:A	T:T	G:G	T:T	T:C	T:T	C:C	G:G	T:T	G:G	A:A	G:A	T:C	A:C
1341	3_12	2019_2nd	train set	control	control	G:G	T:T	C:C	G:G	G:G	A:A	G:G	G:G	T:C	T:C	T:T	G:G	A:G	A:A	C:C	T:T	G:G	C:C	G:G	A:A	A:A	A:A	G:A	G:A	C:T	T:T	C:C	T:T	G:G	C:A	A:A	T:C	G:G	T:A	T:C	A:A	C:T	G:G	T:T	G:A	A:A	G:G	T:C	C:C
1342	3_13	2019_2nd	train set	control	control	G:G	T:T	C:C	G:G	G:G	A:A	G:G	G:T	T:C	T:C	T:T	G:G	A:G	A:A	C:C	T:T	G:G	C:T	G:G	A:A	A:A	A:A	G:A	G:G	C:T	T:T	C:C	T:T	G:G	C:A	A:A	T:C	G:G	T:T	T:C	A:A	C:T	G:G	T:T	G:A	A:A	G:G	T:C	C:C
1343	3_14	2019_2nd	train set	control	control	G:G	T:T	C:C	G:G	G:G	A:A	G:G	G:G	T:C	T:C	T:T	G:G	A:A	A:A	C:T	T:T	G:G	C:C	A:G	A:A	A:A	A:A	G:A	G:G	C:T	T:T	C:C	T:T	G:G	C:A	A:A	T:C	G:G	T:T	T:C	A:A	C:T	G:T	T:T	A:A	A:A	G:A	T:C	C:C
1344	3_15	2019_2nd	train set	control	control	No Call	T:T	C:C	G:G	G:G	A:A	G:G	G:G	T:C	T:C	T:T	G:G	A:A	A:A	C:C	T:T	G:G	C:C	A:G	A:A	A:A	A:A	G:A	G:A	C:C	T:T	C:C	T:T	G:G	C:C	A:A	T:C	G:G	A:A	T:C	A:A	C:T	G:G	T:T	G:A	A:A	G:G	T:C	C:C
1345	3_16	2019_2nd	train set	control	control	G:G	T:T	C:C	G:G	G:G	A:A	G:G	G:G	T:C	T:C	T:T	G:G	A:A	A:A	C:C	T:T	G:G	C:C	A:G	A:A	A:A	A:G	G:A	G:A	T:T	T:T	C:C	T:T	G:G	C:C	A:A	T:T	G:G	T:A	T:C	T:T	C:C	G:G	T:T	G:G	A:A	G:G	T:C	A:C
1346	3_18	2019_2nd	train set	control	control	No Call	T:T	C:C	G:G	G:G	A:A	G:G	G:G	T:T	T:C	T:T	G:G	A:G	A:A	C:C	T:T	G:G	No Call	G:G	A:A	A:A	A:A	G:A	G:A	C:T	T:T	C:C	T:T	G:G	C:C	A:A	T:C	G:G	A:A	T:C	A:A	C:T	G:G	T:T	G:A	A:G	G:G	T:C	C:C
1347	3_19	2019_2nd	train set	control	control	G:G	T:T	T:T	G:G	G:G	A:A	G:G	G:G	T:C	T:C	T:T	G:G	A:A	A:A	C:C	T:T	G:G	C:C	A:G	A:A	A:A	A:G	G:A	G:G	T:T	T:A	C:C	T:T	G:G	C:C	A:A	T:T	G:G	T:T	T:C	A:T	C:C	G:G	T:T	G:G	A:A	G:G	T:C	A:C
1348	3_20	2019_2nd	train set	control	control	G:G	T:T	C:C	G:G	G:G	A:A	G:G	G:G	T:C	T:C	T:T	G:G	A:A	A:A	C:C	T:T	G:G	C:C	A:G	A:A	A:A	A:G	G:A	G:G	C:C	T:T	C:C	T:T	G:G	C:A	A:G	T:T	G:G	A:A	T:C	A:T	C:C	G:G	T:T	G:G	A:A	G:G	T:C	C:C
1349	3_21	2019_2nd	train set	control	control	G:G	T:T	C:C	G:G	G:G	A:A	G:G	G:G	T:C	T:C	T:T	G:G	A:A	A:A	C:C	T:T	G:G	C:C	A:G	A:A	A:A	A:A	G:A	G:G	C:T	T:T	C:C	T:T	G:G	C:C	A:A	T:C	G:G	A:A	T:C	A:A	C:T	G:G	T:T	A:A	A:A	G:G	T:C	A:C
1350	3_23	2019_2nd	test set	control	control	G:G	T:T	C:C	G:G	G:G	A:A	G:G	G:T	T:C	T:C	T:T	G:G	A:A	A:A	C:C	T:T	G:G	C:C	A:G	A:A	A:A	A:A	G:A	G:G	C:C	T:T	C:C	T:T	G:G	C:C	A:A	T:C	G:G	T:A	T:C	A:A	C:T	G:G	T:T	G:A	A:A	G:G	T:C	A:C
1351	3_24	2019_2nd	train set	control	control	G:G	T:T	C:C	G:G	G:G	A:A	G:G	G:G	T:C	T:C	T:T	G:G	A:A	A:G	C:C	T:T	G:G	C:C	A:G	A:A	A:A	A:G	G:A	G:G	C:C	T:T	C:C	T:T	G:G	C:A	A:A	T:T	G:G	A:A	T:C	A:T	C:C	G:G	T:T	G:G	A:A	G:G	T:C	A:C
1352	3_25	2019_2nd	train set	control	control	No Call	T:T	C:C	G:G	G:G	A:A	G:G	G:T	T:C	T:C	C:C	G:G	A:A	A:A	C:C	T:T	G:G	C:C	A:G	A:A	A:A	A:A	G:A	G:G	C:C	T:T	C:C	T:T	G:G	C:C	A:A	T:C	G:G	T:T	T:C	A:A	C:T	G:G	T:T	G:A	A:G	G:G	T:C	C:C
1353	3_26	2019_2nd	train set	control	control	G:G	T:T	C:C	G:G	G:G	A:A	G:G	G:G	T:C	T:C	T:T	G:G	A:A	A:A	C:C	T:T	G:G	No Call	G:G	A:A	A:A	A:A	G:A	G:A	C:T	T:T	C:C	T:T	G:G	C:C	A:A	T:C	G:G	T:A	T:C	A:A	C:T	G:G	T:T	G:A	A:A	G:G	T:C	A:C
1354	3_27	2019_2nd	train set	control	control	G:G	T:T	C:C	G:G	G:G	A:A	G:G	G:T	T:C	T:C	C:C	G:G	A:A	A:A	C:C	T:T	G:G	C:C	A:G	A:A	A:A	A:A	G:A	G:G	C:C	T:T	C:C	T:T	G:G	C:A	A:A	T:C	G:G	T:A	T:C	A:A	C:T	G:G	T:T	G:G	A:G	G:G	T:C	A:A
1355	3_28	2019_2nd	train set	control	control	G:G	T:T	T:T	G:G	G:G	A:A	G:G	G:G	T:C	T:C	T:T	G:G	A:A	A:A	C:C	T:T	G:G	C:C	A:G	A:A	A:A	A:G	G:A	G:G	T:T	T:T	C:C	T:T	G:G	C:A	A:A	T:C	G:G	T:T	T:C	A:A	C:T	G:G	T:T	A:A	A:A	G:G	T:C	A:A
1356	3_29	2019_2nd	train set	control	control	G:G	T:T	C:C	G:G	G:G	A:A	G:G	G:G	T:C	T:C	T:T	G:G	A:A	A:A	C:C	T:T	G:G	C:C	A:G	A:A	A:A	A:A	G:A	G:G	C:C	T:T	C:C	T:T	G:G	C:C	A:A	T:C	G:G	A:A	T:C	T:T	C:T	G:G	T:T	G:G	A:G	G:A	T:C	C:C
1357	3_30	2019_2nd	train set	control	control	G:G	T:T	C:C	G:G	G:G	A:A	G:G	G:T	T:C	T:C	T:T	G:G	A:A	A:A	C:C	T:T	G:G	C:C	A:G	A:A	A:A	A:A	G:A	G:G	C:C	T:T	C:C	T:T	G:G	C:C	A:A	T:C	G:G	T:T	T:C	A:A	C:T	G:G	T:T	G:A	A:A	G:G	T:C	A:A
1358	3_31	2019_2nd	train set	control	control	G:G	T:T	C:C	G:G	G:G	A:A	G:G	G:G	T:C	T:C	T:T	G:G	A:A	A:A	T:T	T:T	G:G	C:C	A:G	A:A	A:A	A:A	G:A	G:G	C:T	T:T	C:C	T:T	G:G	C:C	A:A	T:C	G:G	A:A	T:C	A:A	C:T	G:G	T:T	G:G	A:A	G:A	T:C	A:C
1359	3_32	2019_2nd	test set	control	control	G:G	T:T	T:T	G:G	G:G	A:A	G:G	G:G	T:C	T:C	T:T	G:G	A:A	A:A	C:C	T:T	G:G	C:C	A:G	A:A	A:A	G:G	G:A	G:A	T:T	T:A	C:C	T:T	G:G	C:A	A:A	T:T	G:G	T:A	T:C	A:T	C:C	G:G	T:T	A:A	A:A	G:G	T:C	A:C
1360	3_33	2019_2nd	train set	control	control	G:G	T:T	C:C	G:G	G:G	A:A	G:G	G:G	T:C	T:C	T:T	G:G	A:A	A:A	C:C	T:T	G:G	C:C	A:G	A:A	A:A	A:G	G:A	G:G	C:T	T:T	C:C	T:T	G:G	C:A	A:A	T:T	G:G	T:T	T:C	A:A	C:C	G:G	T:T	G:G	A:A	G:G	T:C	A:C
1361	3_34	2019_2nd	train set	control	control	G:G	T:T	C:C	G:G	G:G	A:A	G:G	G:G	T:T	T:C	T:T	G:G	A:A	A:A	C:C	T:T	G:G	C:C	A:G	A:A	A:A	A:A	G:A	G:A	C:C	T:T	C:C	T:T	G:G	C:A	A:A	T:C	G:G	A:A	T:C	A:A	C:T	G:G	T:T	G:A	A:G	G:G	T:C	A:C
1362	3_35	2019_2nd	train set	control	control	G:G	T:T	C:C	G:G	G:G	A:A	G:G	G:G	T:C	T:C	T:C	G:G	A:G	A:A	C:C	T:T	G:G	C:C	A:G	A:A	A:A	A:A	G:A	G:A	C:C	T:T	C:C	T:T	G:G	C:A	A:A	T:C	G:G	T:T	T:C	A:A	C:T	G:G	T:T	G:G	A:A	G:G	T:C	A:A
1363	3_36	2019_2nd	train set	control	control	G:G	T:T	C:C	G:G	G:G	A:A	G:G	G:G	T:C	T:C	T:T	G:G	A:A	G:G	C:C	T:T	G:G	C:C	A:G	A:A	A:A	A:G	G:A	G:G	C:C	T:A	C:C	T:T	G:G	C:C	A:G	T:T	G:G	A:A	T:C	T:T	C:C	G:G	T:T	G:G	A:G	G:A	T:C	A:C
1364	3_37	2019_2nd	train set	control	control	G:G	T:T	C:C	G:G	G:G	A:A	G:G	G:G	T:C	T:C	T:T	G:G	A:A	A:A	C:C	T:T	G:G	C:C	A:G	A:A	A:A	A:G	G:A	G:G	C:C	T:A	C:C	T:T	G:G	C:A	A:G	T:T	G:G	A:A	T:C	A:T	C:C	G:G	T:T	G:G	A:G	G:A	T:C	C:C
1365	3_38	2019_2nd	train set	control	control	G:G	T:T	C:T	G:G	G:G	A:A	G:G	G:G	T:C	T:C	T:T	G:G	A:A	G:G	C:C	T:T	G:G	C:C	A:G	A:A	A:A	A:G	G:A	G:G	C:T	T:T	C:C	T:T	G:G	C:C	A:A	T:T	G:G	A:A	T:C	T:T	C:C	G:G	T:T	G:G	A:G	G:A	T:C	A:A
1366	3_39	2019_2nd	train set	control	control	G:G	T:T	C:C	G:G	G:G	A:A	G:G	G:G	T:C	T:C	T:T	G:G	A:A	A:A	C:C	T:T	G:G	C:C	A:G	A:A	A:A	A:A	G:A	G:G	T:T	T:T	C:C	T:T	G:G	C:C	A:A	T:C	G:G	T:A	T:C	A:T	C:T	G:G	T:T	A:A	A:A	G:G	T:C	A:C
1367	3_40	2019_2nd	test set	control	case	No Call	T:T	C:C	G:G	G:G	A:A	G:G	G:G	T:C	T:C	T:T	G:G	A:A	A:A	C:C	T:T	G:G	C:C	A:G	A:A	A:A	A:A	G:A	G:A	C:C	T:T	C:C	T:T	G:G	C:A	A:A	T:C	G:G	T:T	T:C	A:A	C:T	G:G	T:T	G:A	A:A	G:G	T:C	C:C
1368	3_41	2019_2nd	train set	control	control	G:G	T:T	C:C	G:G	G:G	A:A	G:G	G:G	T:C	T:C	T:T	G:G	A:A	A:A	C:C	T:T	G:G	C:C	A:G	A:A	A:A	A:G	G:A	G:G	C:C	T:T	C:C	T:T	G:G	C:A	A:G	T:T	G:G	A:A	T:C	A:T	C:C	G:G	T:T	G:G	A:G	G:A	T:C	A:A
1369	3_43	2019_2nd	train set	control	control	No Call	T:T	C:C	G:G	G:G	A:A	G:G	G:T	T:C	T:C	T:T	G:G	A:A	A:A	C:C	T:T	G:G	C:C	A:G	A:A	A:A	A:A	G:A	G:G	C:C	T:T	C:C	T:T	G:G	C:A	A:A	T:C	G:G	T:T	T:C	A:A	C:T	G:G	T:T	G:A	A:A	G:G	T:C	C:C
1370	3_44	2019_2nd	train set	control	control	G:G	T:T	C:C	G:G	G:G	A:A	G:G	G:T	T:T	T:C	T:T	G:G	A:A	A:A	C:C	T:T	G:G	C:C	A:G	A:A	A:A	A:A	G:A	G:G	C:T	T:T	C:C	T:T	G:G	C:A	A:A	T:C	G:G	T:T	T:C	A:A	C:T	G:G	T:T	G:G	A:G	G:G	T:C	A:A
1371	3_45	2019_2nd	test set	control	case	G:G	T:T	T:T	G:G	G:G	A:A	G:G	G:G	T:T	T:C	T:T	G:G	A:A	A:A	C:C	T:T	G:G	C:C	A:G	A:A	A:A	G:G	G:A	G:G	C:T	T:A	C:C	T:T	G:G	C:C	A:A	T:T	G:G	T:T	T:C	A:T	C:C	G:G	T:T	A:A	A:G	G:G	T:C	A:A
1372	3_46	2019_2nd	train set	control	control	G:G	T:T	C:C	G:G	G:G	A:A	G:G	G:T	T:C	T:C	T:T	G:G	A:A	A:A	C:C	T:T	G:G	C:C	A:G	A:A	A:A	A:A	G:A	G:G	C:C	T:T	C:C	T:T	G:G	C:A	A:A	T:C	G:G	T:A	T:C	A:A	C:T	G:G	T:T	G:A	A:A	G:G	T:C	A:C
1373	3_47	2019_2nd	train set	control	control	G:G	T:T	C:C	G:G	G:G	A:A	G:G	G:T	T:C	T:C	C:C	G:G	A:A	A:A	C:C	T:T	G:G	T:T	G:G	A:A	A:A	A:A	G:A	G:G	C:T	T:T	C:C	T:T	G:G	C:A	A:A	T:C	G:G	A:A	T:C	A:A	C:T	G:G	T:T	G:A	A:A	G:G	T:C	A:C
1374	3_48	2019_2nd	train set	control	control	G:G	T:T	C:C	G:G	G:G	A:A	G:G	G:G	T:T	T:C	T:T	G:G	A:A	A:A	C:C	T:T	G:G	C:C	A:G	A:A	A:A	A:A	G:A	G:G	C:T	T:T	C:C	T:T	G:G	C:C	A:A	T:T	G:G	T:T	T:C	A:A	C:C	G:G	T:T	A:A	A:A	G:G	T:C	A:A
1375	3_49	2019_2nd	train set	control	control	G:G	T:T	C:C	G:G	G:G	A:A	G:G	G:G	T:C	T:C	T:T	G:G	A:A	A:A	C:C	T:T	G:G	C:C	A:G	A:A	A:A	A:G	G:A	G:G	C:C	T:T	C:C	T:T	G:G	C:A	A:G	T:T	G:G	A:A	T:C	A:T	C:C	G:G	T:T	G:G	A:A	G:A	T:C	A:A
1376	3_50	2019_2nd	train set	control	control	G:G	T:T	C:C	G:G	G:G	A:A	G:G	G:G	T:T	T:C	T:T	G:G	A:A	A:A	C:C	T:T	G:G	C:C	A:G	A:A	A:A	A:A	G:A	G:A	C:C	T:T	C:C	T:T	G:G	C:A	A:A	T:C	G:G	T:T	T:C	A:A	C:T	G:G	T:T	G:G	A:G	G:G	T:C	A:C
1377	3_51	2019_2nd	test set	control	control	G:G	T:T	C:C	G:G	G:G	A:A	G:G	G:G	T:C	T:C	T:T	G:G	A:A	A:A	C:C	T:T	G:G	C:C	A:G	A:A	A:A	A:G	G:A	G:G	C:C	T:A	C:C	T:T	G:G	C:A	A:A	T:T	G:G	A:A	T:C	A:T	C:C	G:G	T:T	G:G	A:G	G:A	T:C	A:C
1378	3_52	2019_2nd	train set	control	control	G:G	T:T	C:C	G:G	G:G	A:A	G:G	G:T	T:C	T:C	No Call	G:G	A:A	A:A	C:C	T:T	G:G	C:C	A:G	A:A	A:A	A:A	G:A	G:G	C:C	T:T	C:C	T:T	G:G	C:C	A:A	T:C	G:G	A:A	T:C	A:A	C:T	G:G	T:T	G:A	A:A	G:G	T:C	C:C
1379	3_53	2019_2nd	train set	control	control	No Call	T:T	T:T	G:G	G:G	A:A	G:G	G:G	T:C	T:C	T:T	G:G	A:A	A:A	C:C	T:T	G:G	C:C	A:G	A:A	A:A	A:G	G:A	G:G	T:T	A:A	C:C	T:T	G:G	C:C	A:A	T:T	G:A	T:A	T:C	A:T	C:C	G:G	T:T	G:G	A:A	G:G	T:C	C:C
1380	3_54	2019_2nd	train set	control	control	No Call	T:T	C:C	G:G	G:G	A:A	G:G	G:G	T:C	T:C	T:T	G:G	A:G	A:A	C:C	T:T	G:G	C:C	A:G	A:A	A:A	A:A	G:A	G:A	C:T	T:T	C:C	T:T	G:G	C:A	A:A	T:C	G:G	T:T	T:C	A:A	C:T	G:G	T:T	G:A	A:A	G:G	T:C	C:C
1381	3_55	2019_2nd	test set	control	control	G:G	T:T	C:C	G:G	G:G	A:A	G:G	G:T	T:C	T:C	T:T	G:G	A:G	A:A	C:C	T:T	G:G	C:C	A:G	A:A	A:A	A:A	G:A	G:G	C:T	T:T	C:C	T:T	G:G	C:A	A:A	T:C	G:G	T:T	T:C	A:A	C:T	G:G	T:T	G:A	A:A	G:G	T:C	A:C
1382	3_56	2019_2nd	test set	control	case	G:G	T:T	T:T	G:G	G:G	A:A	G:G	G:G	T:C	T:C	T:T	G:G	A:A	A:A	C:C	T:T	G:G	C:C	A:G	A:A	A:A	A:A	G:A	G:G	T:T	T:T	C:C	T:T	G:G	C:C	A:A	T:C	G:G	T:T	T:C	A:T	C:T	G:G	T:T	G:G	A:G	G:G	T:C	A:C
1383	3_57	2019_2nd	train set	control	control	G:G	T:T	C:C	G:G	G:G	A:A	G:G	G:G	T:C	T:C	T:T	G:G	A:A	A:A	C:C	T:T	G:G	C:C	A:G	A:A	A:A	A:A	G:A	G:G	C:T	T:T	C:C	T:T	G:G	C:A	A:A	T:C	G:G	A:A	T:C	A:T	C:T	G:G	T:T	A:A	A:A	G:A	T:C	A:C
1384	3_58	2019_2nd	train set	control	control	G:G	T:T	C:C	G:G	G:G	A:A	G:G	G:T	T:C	T:C	T:T	G:G	A:A	A:A	C:C	T:T	G:G	C:C	A:G	A:A	A:A	A:A	G:A	G:G	C:C	T:T	C:C	T:T	G:G	C:C	A:A	T:C	G:G	T:T	T:C	A:A	C:T	G:G	T:T	G:A	A:A	G:G	T:C	A:C
1385	3_59	2019_2nd	test set	control	control	G:G	T:T	C:C	G:G	G:G	A:A	G:G	G:G	T:C	T:C	T:T	G:G	A:A	A:A	C:C	T:T	G:G	C:C	A:G	A:A	A:A	A:G	G:A	G:G	C:C	T:A	C:C	T:T	G:G	C:A	A:A	T:T	G:G	A:A	T:C	A:T	C:C	G:G	T:T	G:G	A:A	G:G	T:C	A:C
1386	3_61	2019_2nd	train set	control	control	G:G	T:T	C:T	G:G	G:G	A:A	G:G	G:G	T:C	T:C	T:T	G:G	A:A	A:A	C:C	T:T	G:G	C:C	A:G	A:A	A:A	A:G	G:A	G:G	C:T	T:T	C:C	T:T	G:G	A:A	A:A	T:C	G:G	T:T	T:C	A:A	C:C	G:T	T:T	A:A	A:A	G:G	T:C	A:C
1387	3_62	2019_2nd	train set	control	control	G:G	T:T	C:C	G:G	G:G	A:A	G:G	G:T	T:C	T:C	T:T	G:G	A:A	A:A	C:C	T:T	G:G	C:C	A:G	A:A	A:A	A:A	G:A	G:G	C:T	T:T	C:C	T:T	G:G	C:A	A:A	T:C	G:G	T:A	T:C	A:A	C:T	G:G	T:T	G:A	A:A	G:G	T:C	A:C
1388	3_63	2019_2nd	train set	control	control	G:G	T:T	C:T	G:G	G:G	A:A	G:G	G:G	T:C	T:C	T:T	G:G	A:A	A:A	C:C	T:T	G:G	C:C	A:G	A:A	A:A	A:A	G:A	G:G	C:T	T:T	C:C	T:T	G:G	C:C	A:A	T:T	G:G	T:T	T:C	T:T	C:C	G:G	T:T	G:G	A:G	G:G	T:C	A:A
1389	3_64	2019_2nd	train set	control	control	G:G	T:T	C:C	G:G	G:G	A:A	G:G	G:G	T:C	T:C	T:T	G:G	A:A	A:A	C:C	T:T	G:G	C:C	A:G	A:A	A:A	A:G	G:A	G:G	T:T	T:T	C:C	T:T	G:G	C:A	A:A	T:T	G:G	T:T	T:C	A:T	C:C	G:G	T:T	G:G	A:A	G:G	T:C	A:C
1390	3_65	2019_2nd	train set	control	control	G:G	T:T	C:C	G:G	G:G	A:A	G:G	G:G	T:T	T:C	T:T	G:G	A:G	A:A	C:C	T:T	G:G	C:C	A:G	A:A	A:A	A:A	G:A	G:A	C:C	T:T	C:C	T:T	G:G	C:C	A:A	T:C	G:G	T:T	T:C	A:A	C:T	G:G	T:T	G:A	A:G	G:G	T:C	C:C
1391	3_66	2019_2nd	train set	control	control	G:G	T:T	C:T	G:G	G:G	A:A	G:G	G:G	T:C	T:C	T:T	G:G	A:A	A:G	C:C	T:T	G:G	C:C	A:G	A:A	A:A	A:A	G:A	G:G	C:T	T:T	C:C	T:T	G:G	C:C	A:G	T:C	G:G	A:A	T:C	A:T	C:T	G:G	T:T	G:G	A:A	G:A	T:C	A:A
1392	3_67	2019_2nd	train set	control	control	G:G	T:T	C:C	G:G	G:G	A:A	G:G	G:G	T:T	T:C	T:T	G:G	A:A	A:A	C:C	T:T	G:G	C:C	A:G	A:A	A:A	A:A	G:A	G:G	C:T	T:T	C:C	T:T	G:G	C:C	A:A	T:T	G:G	T:T	T:C	A:A	C:C	G:T	T:T	G:G	A:A	G:A	T:C	A:C
1393	3_68	2019_2nd	train set	control	control	G:G	T:T	C:C	G:G	G:G	A:A	G:G	G:G	T:C	T:C	C:C	G:G	A:A	A:A	C:C	T:T	G:G	C:C	A:G	A:A	A:A	A:A	G:A	G:A	C:T	T:T	C:C	T:T	G:G	C:A	A:A	T:C	G:G	T:T	T:C	A:A	C:T	G:G	T:T	G:A	A:A	G:G	T:C	A:A
1394	3_69	2019_2nd	train set	control	control	No Call	T:T	C:C	G:G	G:G	A:A	G:G	G:T	T:C	T:C	C:C	G:G	A:A	A:A	C:C	T:T	G:G	C:C	A:G	A:A	A:A	A:A	G:A	G:G	C:C	T:T	C:C	T:T	G:G	C:C	A:A	T:C	G:G	T:A	T:C	A:A	C:T	G:G	T:T	G:A	A:A	G:G	T:C	C:C
1395	3_70	2019_2nd	train set	control	control	G:G	T:T	C:C	G:G	G:G	A:A	G:G	G:T	T:C	T:C	T:T	G:G	A:G	A:A	C:C	T:T	G:G	C:C	A:G	A:A	A:A	A:A	G:A	G:G	C:C	T:T	C:C	T:T	G:G	C:A	A:A	T:C	G:G	T:A	T:C	A:A	C:T	G:G	T:T	G:A	A:A	G:G	T:C	A:C
1396	3_71	2019_2nd	train set	control	control	G:G	T:T	C:C	G:G	G:G	A:A	G:G	G:G	T:C	T:C	T:T	G:G	A:A	A:A	T:T	T:T	G:G	C:C	A:G	A:A	A:A	A:A	G:A	G:G	C:T	T:T	C:C	T:T	G:G	C:C	A:A	T:C	G:G	T:T	T:C	A:T	C:T	G:G	T:T	G:G	A:A	G:A	T:C	A:A
1397	3_72	2019_2nd	test set	control	control	G:G	T:T	T:T	G:G	G:G	A:A	G:G	G:G	T:C	T:C	T:T	G:G	A:A	A:A	C:C	T:T	G:G	C:C	A:G	A:A	A:A	A:G	G:A	G:A	T:T	T:T	C:C	T:T	G:G	C:C	A:A	T:T	G:G	T:T	T:C	A:T	C:C	G:G	T:T	A:A	A:A	G:G	T:C	A:A
1398	3_73	2019_2nd	train set	control	control	G:G	T:T	C:C	G:G	G:G	A:A	G:G	G:G	T:C	T:C	T:T	G:G	A:A	A:A	C:C	T:T	G:G	C:C	A:G	A:A	A:A	A:G	G:A	G:G	C:T	T:T	C:C	T:T	G:G	C:C	A:A	T:C	G:G	T:A	T:C	A:A	C:T	G:T	T:T	G:G	A:A	G:A	T:C	A:C
1399	3_74	2019_2nd	train set	control	control	No Call	T:T	C:C	C:C	G:G	A:A	G:G	G:T	T:C	T:C	T:T	G:G	A:G	A:A	C:C	T:T	G:G	C:C	A:G	A:A	A:A	A:A	G:A	G:G	C:C	T:T	C:C	T:T	G:G	C:C	A:A	T:T	G:G	A:A	T:C	A:A	C:C	G:G	G:G	G:G	A:A	G:G	T:C	C:C
1400	3_76	2019_2nd	train set	control	control	G:G	T:T	C:C	G:G	G:G	A:A	G:G	G:T	T:C	T:C	No Call	G:G	A:G	A:A	C:C	T:T	G:G	C:C	A:G	A:A	A:A	A:A	G:A	G:G	C:T	T:T	C:C	T:T	G:G	C:C	A:A	T:T	G:G	T:A	T:C	A:T	C:C	G:G	G:G	A:A	A:A	G:G	T:C	A:C
1401	3_77	2019_2nd	train set	control	control	G:G	T:T	C:C	G:G	G:G	A:A	G:G	G:G	T:C	T:C	T:T	G:G	A:A	G:G	C:C	T:T	G:G	C:C	A:G	A:A	A:A	A:A	G:A	G:G	C:C	T:A	C:C	T:T	G:G	C:C	A:G	T:C	G:G	A:A	T:C	T:T	C:T	G:G	T:T	G:G	A:A	G:A	T:C	A:A
1402	3_78	2019_2nd	train set	control	control	No Call	T:T	C:C	G:G	G:G	A:A	G:G	G:T	T:C	T:C	T:C	G:G	A:G	A:A	C:C	T:T	G:G	C:C	A:G	A:A	A:A	A:A	G:A	G:G	C:T	T:T	C:C	T:T	G:G	C:A	A:A	T:C	G:G	A:A	T:C	A:A	C:T	G:G	T:T	G:A	A:A	G:G	T:C	C:C
1403	3_79	2019_2nd	train set	control	control	G:G	T:T	C:C	G:G	G:G	A:A	G:G	G:T	T:C	T:C	T:T	G:G	A:G	A:A	C:C	T:T	G:G	C:C	A:G	A:A	A:A	A:A	G:A	G:G	C:T	T:T	C:C	T:T	G:G	C:A	A:A	T:C	G:G	T:T	T:C	A:A	C:T	G:G	T:T	G:A	A:A	G:G	T:C	A:C
1404	3_80	2019_2nd	train set	control	control	G:G	T:T	C:C	G:G	G:G	A:A	G:G	G:T	T:C	T:C	T:T	G:G	A:A	A:A	C:C	T:T	G:G	C:C	A:G	A:A	A:A	A:A	G:A	G:G	C:C	T:T	C:C	T:T	G:G	C:A	A:A	T:C	G:G	T:T	T:C	A:A	C:T	G:G	T:T	G:A	A:A	G:G	T:C	A:A
1405	3_81	2019_2nd	train set	control	control	G:G	T:T	C:C	G:G	G:G	A:A	G:G	G:G	T:C	T:C	T:T	G:G	A:A	A:A	C:C	T:T	G:G	No Call	G:G	A:A	A:A	A:A	G:A	G:G	T:T	T:T	C:C	T:T	G:G	C:A	A:A	T:T	G:G	T:T	T:C	A:T	C:C	G:G	T:T	G:G	A:A	G:G	T:C	A:C
1406	3_82	2019_2nd	train set	control	control	G:G	T:T	C:C	G:G	G:G	A:A	G:G	G:T	T:C	T:C	T:T	G:G	A:A	A:A	C:C	T:T	G:G	C:C	A:G	A:A	A:A	A:A	G:A	G:G	C:C	T:T	C:C	T:T	G:G	C:A	A:A	T:C	G:G	T:A	T:C	A:A	C:T	G:G	T:T	G:A	A:G	G:G	T:C	A:C
1407	3_83	2019_2nd	train set	control	control	G:G	T:T	C:C	G:G	G:G	A:A	G:G	G:G	T:C	T:C	T:T	G:G	A:G	A:A	C:C	T:T	G:G	C:C	A:G	A:A	A:A	A:A	G:A	G:A	C:C	T:T	C:C	T:T	G:G	C:C	A:A	T:C	G:G	A:A	T:C	A:A	C:T	G:G	T:T	G:A	A:A	G:G	T:C	A:C
1408	3_84	2019_2nd	test set	control	control	G:G	T:T	C:C	G:G	G:G	A:A	G:G	G:G	T:C	T:C	T:T	G:G	A:A	A:A	C:C	T:T	G:G	C:C	G:G	A:A	A:A	A:A	G:A	G:A	C:T	T:T	C:C	T:T	G:G	C:C	A:A	T:C	G:G	A:A	T:C	A:A	C:T	G:G	T:T	G:A	A:A	G:G	T:C	A:C
1409	3_85	2019_2nd	train set	control	control	G:G	T:T	C:C	G:G	G:G	A:A	G:G	G:G	T:T	T:C	T:T	G:G	A:A	A:A	C:C	T:T	G:G	T:T	G:G	A:A	A:A	A:A	G:A	G:G	T:T	T:T	C:C	T:T	G:G	C:A	A:A	T:C	G:G	T:T	T:C	A:T	C:T	G:T	T:T	A:A	A:A	G:G	T:C	A:C
1410	3_87	2019_2nd	train set	control	control	G:G	T:T	T:T	G:G	G:G	A:A	G:G	G:G	T:C	T:C	T:T	G:G	A:A	A:A	C:C	T:T	G:G	C:C	A:G	A:A	A:A	G:G	G:A	G:A	T:T	T:T	C:C	T:T	G:G	C:C	A:A	T:T	G:G	T:T	T:C	T:T	C:C	G:G	T:T	A:A	A:A	G:G	T:C	A:C
1411	3_88	2019_2nd	train set	control	control	G:G	T:T	C:C	G:G	G:G	A:A	G:G	G:T	T:C	T:C	T:T	G:G	A:A	A:A	C:C	T:T	G:G	C:C	A:G	A:A	A:A	A:A	G:A	G:G	C:C	T:T	C:C	T:T	G:G	C:C	A:A	T:C	G:G	T:A	T:C	A:A	C:T	G:G	T:T	G:G	A:A	G:G	T:C	A:C
1412	3_89	2019_2nd	train set	control	control	G:G	T:T	C:C	G:G	G:G	A:A	G:G	G:G	T:C	T:C	T:T	G:G	A:A	A:A	C:C	T:T	G:G	C:C	A:G	A:A	A:A	A:G	G:A	G:G	C:C	T:A	C:C	T:T	G:G	C:A	A:G	T:T	G:G	A:A	T:C	A:T	C:C	G:G	T:T	G:G	A:A	G:A	T:C	C:C
1413	3_90	2019_2nd	train set	control	control	G:G	T:T	C:C	G:G	G:G	A:A	G:G	G:G	T:C	T:C	T:T	G:G	A:A	A:A	C:C	T:T	G:G	C:C	A:G	A:A	A:A	A:A	G:A	G:G	C:T	T:T	C:C	T:T	G:G	C:A	A:A	T:T	G:G	T:T	T:C	A:A	C:C	G:T	T:T	G:G	A:A	G:G	T:C	C:C
1414	3_91	2019_2nd	train set	control	control	No Call	T:T	C:C	G:G	G:G	A:A	G:G	G:G	T:C	T:C	T:T	G:G	A:A	A:A	C:C	T:T	G:G	C:C	A:G	A:A	A:A	A:G	G:A	G:G	C:T	T:T	C:C	T:T	G:G	C:C	A:A	T:T	G:G	A:A	T:C	A:T	C:C	G:T	T:T	A:A	A:A	G:G	T:C	C:C
1415	3_92	2019_2nd	train set	control	control	No Call	T:T	C:C	G:G	G:G	A:A	G:G	G:T	T:C	T:C	T:C	G:G	A:A	A:A	C:C	T:T	G:G	C:C	A:G	A:A	A:A	A:A	G:A	G:G	C:C	T:T	C:C	T:T	G:G	C:A	A:A	T:C	G:G	T:T	T:C	A:A	C:T	G:G	T:T	G:A	A:A	G:G	T:C	C:C
1416	3_93	2019_2nd	train set	control	control	No Call	T:T	C:C	G:G	G:G	A:A	G:G	G:G	T:C	T:C	C:C	G:G	A:A	A:A	C:C	T:T	G:G	C:C	A:G	A:A	A:A	A:A	G:A	G:A	C:C	T:T	C:C	T:T	G:G	C:A	A:A	T:C	G:G	T:A	T:C	A:A	C:T	G:G	T:T	G:A	A:A	G:G	T:C	C:C
1417	3_94	2019_2nd	train set	control	control	G:G	T:T	C:C	G:G	G:G	A:A	G:G	G:T	T:T	T:C	T:T	G:G	A:G	A:A	C:C	T:T	G:G	C:C	A:G	A:A	A:A	A:A	G:A	G:G	C:C	T:T	C:C	T:T	G:G	C:C	A:A	T:C	G:G	A:A	T:C	A:A	C:T	G:G	T:T	G:A	A:G	G:G	T:C	A:C
1418	3_95	2019_2nd	train set	control	control	G:G	T:T	C:T	G:G	G:G	A:A	G:G	G:G	T:C	T:C	T:T	G:G	A:A	A:G	C:C	T:T	G:G	C:C	A:G	A:A	A:A	A:A	G:A	G:G	C:T	T:T	C:C	T:T	G:G	C:A	A:G	T:C	G:G	A:A	T:C	A:T	C:T	G:G	T:T	G:A	A:G	G:G	T:C	A:C
1419	3_96	2019_2nd	train set	control	control	G:G	T:T	C:C	G:G	G:G	A:A	G:G	G:G	T:C	T:C	T:T	G:G	A:A	A:A	C:C	T:T	G:G	C:C	A:G	A:A	A:A	A:A	G:A	G:G	C:C	T:T	C:C	T:T	G:G	C:C	A:G	T:T	G:G	A:A	T:C	T:T	C:C	G:G	T:T	G:G	A:A	G:A	T:C	C:C
1420	3_97	2019_2nd	train set	control	control	G:G	T:T	C:C	G:G	G:G	A:A	G:G	G:G	T:C	T:C	T:C	G:G	A:A	A:A	C:C	T:T	G:G	C:C	A:G	A:A	A:A	A:A	G:A	G:A	C:C	T:T	C:C	T:T	G:G	C:A	A:A	T:C	G:G	A:A	T:C	A:A	C:T	G:G	T:T	G:A	A:A	G:G	T:C	A:C
1421	3_98	2019_2nd	test set	control	case	G:G	T:T	C:C	G:G	G:G	A:A	G:G	G:G	T:T	T:C	T:T	G:G	A:A	A:A	C:C	T:T	G:G	C:C	A:G	A:A	A:A	A:A	G:A	G:A	C:T	T:T	C:C	T:T	G:G	C:A	A:A	T:C	G:G	A:A	T:C	A:A	C:T	G:G	T:T	G:A	A:G	G:G	T:C	A:C
1422	3_99	2019_2nd	test set	control	case	G:G	T:T	C:C	G:G	G:G	A:A	G:G	G:G	T:C	T:C	T:T	G:G	A:A	A:G	C:C	T:T	G:G	C:C	A:G	A:A	A:A	A:G	G:A	G:G	C:C	T:A	C:C	T:T	G:G	C:C	A:G	T:C	G:G	A:A	T:C	A:T	C:T	G:G	T:T	G:G	A:G	G:G	T:C	A:C
1423	3_100	2019_2nd	train set	control	control	G:G	T:T	C:C	G:G	G:G	A:A	G:G	G:T	T:T	T:C	T:T	G:G	A:A	A:A	C:C	T:T	G:G	No Call	G:G	A:A	A:A	A:A	G:A	G:G	C:T	T:T	C:C	T:T	G:G	C:A	A:A	T:C	G:G	T:A	T:C	A:A	C:T	G:G	T:T	G:A	A:G	G:G	T:C	C:C
1424	3_101	2019_2nd	train set	control	control	No Call	T:T	C:C	G:G	G:G	A:A	G:G	G:G	T:T	T:C	T:T	G:G	A:A	A:A	C:C	T:T	G:G	T:T	G:G	A:A	A:A	A:G	G:A	G:G	T:T	T:T	C:C	T:T	G:G	C:A	A:A	T:T	G:G	T:T	T:C	A:T	C:C	G:T	T:T	A:A	A:A	G:A	T:C	C:C
1425	3_103	2019_2nd	train set	control	control	G:G	T:T	C:C	G:G	G:G	A:A	G:G	G:T	T:C	T:C	T:T	G:G	A:A	A:A	C:C	T:T	G:G	C:C	A:G	A:A	A:A	A:A	G:A	G:G	C:T	T:T	C:C	T:T	G:G	C:C	A:A	T:C	G:G	T:A	T:C	A:A	C:T	G:G	T:T	G:G	A:A	G:G	T:C	A:C
1426	P1_B5	2020_1st	train set	case	case	G:G	T:T	C:C	G:G	G:G	A:A	G:G	G:T	T:C	T:C	T:T	G:G	A:A	A:A	T:T	T:T	G:G	No Call	G:G	A:A	A:A	A:A	G:A	G:G	C:T	T:A	C:C	T:T	G:G	C:C	A:A	T:T	G:A	T:T	T:C	T:T	C:C	G:G	T:G	G:G	A:G	A:A	T:T	A:C
1427	P1_B9	2020_1st	test set	control	case	G:G	T:T	C:C	G:C	G:G	A:A	G:G	G:G	C:C	T:C	T:T	G:G	A:A	A:A	C:C	T:T	G:G	C:T	A:G	A:A	A:A	A:A	G:A	G:G	C:T	T:T	C:C	T:T	G:G	C:A	A:A	T:C	G:G	A:A	T:C	A:A	C:C	G:G	T:T	G:G	A:A	G:G	T:T	A:C
1428	P1_B18	2020_1st	test set	control	case	G:G	T:T	C:C	G:G	G:G	A:A	G:G	G:G	T:T	T:C	T:T	G:G	A:G	A:A	C:C	T:T	G:G	C:T	A:G	A:A	A:A	A:G	G:A	G:G	C:T	T:A	C:C	T:T	G:G	C:C	A:A	T:C	G:A	A:A	T:C	A:T	C:C	G:G	T:T	G:A	A:A	G:A	T:T	A:C
1429	P1_B19	2020_1st	test set	control	control	G:G	T:T	C:C	G:G	G:G	A:A	G:G	G:G	T:T	T:C	T:T	G:G	A:G	A:A	C:C	T:T	G:G	C:T	A:G	A:A	A:A	A:A	G:A	G:G	C:C	T:T	C:C	T:T	G:G	C:C	A:A	T:C	G:G	A:A	T:C	T:T	C:C	G:G	T:T	G:A	A:A	G:A	T:T	C:C
1430	P1_B24	2020_1st	train set	control	control	No Call	T:T	C:C	G:G	G:G	A:A	G:G	G:G	T:C	T:C	T:T	G:G	A:G	A:A	C:T	T:T	G:G	C:T	A:G	A:A	A:A	A:A	G:A	G:G	C:C	T:A	C:C	T:T	G:G	C:C	A:A	T:C	G:A	A:A	T:C	A:T	C:C	G:G	T:G	G:G	A:A	G:G	T:T	C:C
1431	P1_B29	2020_1st	test set	case	case	G:G	T:T	C:C	G:G	G:G	A:A	G:G	G:G	T:T	T:C	T:T	G:G	A:G	A:A	C:C	T:T	G:G	C:T	A:G	A:A	A:A	A:A	G:A	G:G	C:C	T:T	C:C	T:T	G:G	C:C	A:A	T:T	G:G	T:A	T:C	A:A	C:C	G:G	T:G	A:A	A:A	G:G	T:T	C:C
1432	P1_B32	2020_1st	train set	control	control	G:G	T:T	C:C	G:G	G:G	A:A	G:G	G:T	T:T	T:C	T:T	G:G	A:G	A:A	C:T	T:T	G:G	C:T	A:G	A:A	A:A	A:A	G:A	G:G	C:C	T:T	C:C	T:T	G:G	C:C	A:A	T:C	G:A	T:A	T:C	A:T	C:C	G:G	T:G	G:G	A:A	G:A	T:T	A:C
1433	P1_B38	2020_1st	train set	case	case	G:G	T:T	C:C	G:G	G:G	A:A	G:G	G:G	T:C	T:C	T:T	G:G	A:A	A:A	C:C	T:T	G:G	C:T	A:G	A:A	A:A	A:A	G:A	G:G	C:C	T:T	C:C	T:T	G:G	C:C	A:A	T:C	G:G	T:A	T:C	A:T	C:C	G:G	T:T	G:A	A:G	G:G	T:T	A:C
1434	P1_B41	2020_1st	train set	control	control	G:G	T:T	C:C	G:C	G:G	A:A	G:G	G:G	T:C	T:C	T:T	G:G	A:A	A:A	C:C	T:T	G:G	C:T	A:G	A:A	A:A	A:A	G:A	G:G	C:T	T:T	C:C	T:T	G:G	C:A	A:A	T:T	G:G	T:T	T:C	A:A	C:C	G:G	T:T	G:G	A:A	G:G	T:T	C:C
1435	P1_B49	2020_1st	train set	case	case	G:G	T:T	C:T	G:C	G:G	A:A	G:G	G:G	T:C	T:C	T:T	G:G	A:A	A:A	C:C	T:T	G:G	C:T	A:G	A:A	A:A	A:A	G:A	G:G	C:T	T:T	C:C	T:T	G:G	C:A	A:A	T:C	G:A	A:A	T:C	A:A	C:T	G:G	T:T	G:A	A:A	G:A	T:T	A:C
1436	P1_B57	2020_1st	train set	case	case	G:G	T:T	C:T	G:G	G:G	A:A	G:G	G:G	T:C	T:C	T:T	G:G	A:A	A:A	C:T	T:T	G:G	C:T	A:G	A:A	A:A	A:G	G:A	G:G	C:T	T:T	C:T	T:T	G:G	C:C	A:A	T:C	G:A	T:A	T:C	A:T	C:C	G:G	T:T	G:A	A:G	G:A	T:T	C:C
1437	P1_B60	2020_1st	train set	case	case	G:G	T:T	C:T	G:G	G:G	A:A	G:G	G:G	T:C	T:C	T:T	G:G	A:A	A:A	C:C	T:T	G:G	C:T	A:G	A:A	A:A	A:G	G:A	G:G	C:T	T:T	C:C	T:T	G:G	C:C	A:A	T:T	G:A	A:A	T:C	A:A	C:C	G:G	T:T	G:G	A:A	G:G	T:T	A:A
1438	P1_B61	2020_1st	train set	case	case	G:G	T:T	C:C	G:G	G:G	A:A	G:G	G:G	T:C	T:C	T:T	G:G	A:A	A:A	C:T	T:T	G:G	C:T	A:G	A:A	A:A	A:A	G:A	G:G	C:T	T:A	C:C	T:T	G:G	C:C	A:A	T:C	G:A	A:A	T:C	T:T	C:C	G:G	T:G	G:G	A:A	G:A	T:T	A:C
1439	P1_B64	2020_1st	test set	case	control	G:G	T:T	C:C	G:G	G:G	A:A	G:G	G:G	C:C	T:C	T:T	G:G	A:A	A:A	C:C	T:T	G:G	C:T	A:G	A:A	A:A	A:G	G:A	G:G	C:T	T:T	C:C	T:T	G:G	C:A	A:A	T:T	G:G	T:T	T:C	A:A	C:C	G:G	T:T	G:G	A:A	G:A	T:T	A:C
1440	P1_B67	2020_1st	train set	control	control	G:G	T:T	C:C	G:G	G:G	A:A	G:G	G:T	T:T	T:C	T:T	G:G	A:A	A:A	C:T	T:T	G:G	C:T	A:G	A:A	A:A	A:G	G:A	G:G	C:C	T:A	C:C	T:T	G:G	C:C	A:A	T:T	G:G	T:A	T:C	T:T	C:C	G:G	T:G	G:A	A:G	G:G	T:T	A:C
1441	P1_B69	2020_1st	train set	case	case	G:G	T:T	C:C	G:G	G:G	A:A	G:G	G:G	T:C	T:C	T:T	G:G	A:A	A:A	C:C	T:T	G:G	C:T	A:G	A:A	A:A	A:G	G:A	G:G	C:T	T:T	C:T	T:T	G:G	C:C	A:A	T:T	G:A	T:T	T:C	A:A	C:C	G:T	T:T	G:G	A:A	G:A	T:T	A:C
1442	P1_B73	2020_1st	train set	control	control	G:G	T:T	C:T	G:G	G:G	A:A	G:G	G:G	T:C	T:C	T:T	G:G	A:A	A:A	C:C	T:T	G:G	C:T	A:G	A:A	A:A	A:G	G:A	G:G	C:T	T:T	C:C	T:T	G:G	C:A	A:A	T:T	G:G	A:A	T:C	A:A	C:C	G:G	T:T	G:G	A:G	G:G	T:T	A:C
1443	P1_B74	2020_1st	train set	control	control	G:G	T:T	C:C	G:G	G:G	A:A	G:G	G:G	T:T	T:C	T:T	G:G	A:A	A:A	C:C	T:T	G:G	C:T	A:G	A:A	A:A	A:G	G:A	G:G	C:C	T:T	C:C	T:T	G:G	C:C	A:A	T:T	G:A	T:A	T:C	T:T	C:C	G:G	T:T	G:G	A:A	G:A	T:T	C:C
1444	P1_B81	2020_1st	train set	control	control	No Call	T:T	C:C	G:C	G:G	A:A	G:G	G:G	T:C	T:C	T:T	G:G	A:A	A:A	C:C	T:T	G:G	C:T	G:G	A:A	A:A	A:A	G:A	G:G	C:T	T:T	C:C	T:T	G:G	C:C	A:A	T:T	G:G	T:T	T:C	A:A	C:C	G:G	T:T	G:G	A:G	G:G	T:T	C:C
1445	P1_B84	2020_1st	train set	control	control	G:G	T:T	C:C	G:G	G:G	A:A	G:G	G:G	T:C	T:C	T:T	G:G	A:A	A:A	T:T	T:T	G:G	C:T	A:G	A:A	A:A	A:A	G:A	G:G	C:T	T:T	C:C	T:T	G:G	C:C	A:A	T:C	A:A	A:A	T:C	T:T	C:C	G:G	T:T	G:A	A:G	G:A	T:T	A:C
1446	P1_B91	2020_1st	train set	control	control	No Call	T:T	C:C	G:G	G:G	A:A	G:G	G:T	T:T	T:C	T:T	G:G	A:A	A:A	T:T	T:T	G:G	C:T	G:G	A:A	A:A	A:A	G:A	G:G	C:T	T:T	C:C	T:T	G:G	C:A	A:A	T:T	G:G	T:T	T:C	A:T	C:C	G:G	T:T	G:G	A:A	G:G	T:T	C:C
1447	P1_B93	2020_1st	test set	case	case	G:G	T:T	C:C	G:G	G:G	A:A	G:G	G:G	T:T	T:C	T:T	G:G	A:A	A:A	T:T	T:T	G:G	C:T	A:G	A:A	A:A	A:A	G:A	G:G	T:T	T:T	C:C	T:T	G:G	C:C	A:A	T:T	G:G	T:T	T:C	A:T	C:C	G:G	T:T	A:A	A:A	G:G	T:T	A:A
1448	P1_B94	2020_1st	train set	case	case	G:G	T:T	T:T	G:G	G:G	A:A	G:G	G:G	C:C	T:C	T:T	G:G	A:A	A:A	C:C	T:T	G:G	C:T	A:G	A:A	A:A	A:A	G:A	G:G	T:T	T:T	C:T	T:T	G:G	C:A	A:A	T:T	G:G	T:T	T:C	A:A	C:C	G:G	T:T	A:A	A:A	G:A	T:T	A:C
1449	P1_B96	2020_1st	train set	case	case	No Call	T:T	C:C	G:G	G:G	A:A	G:G	G:G	T:C	T:C	T:T	G:G	A:A	A:A	T:T	T:T	G:G	C:T	A:G	A:A	A:A	G:G	G:A	G:G	T:T	T:A	C:T	T:T	G:G	C:C	A:A	T:C	A:A	T:T	T:C	A:T	C:T	G:G	T:T	G:G	A:A	A:A	T:T	C:C
1450	P1_B98	2020_1st	train set	control	control	G:G	T:T	C:T	G:G	G:G	A:A	G:G	G:G	T:T	T:C	T:T	G:C	A:A	A:A	C:C	T:T	G:G	C:T	A:G	A:A	A:A	A:A	G:A	G:G	C:T	T:T	C:C	T:T	G:G	C:C	A:A	T:C	G:G	A:A	T:C	T:T	C:C	G:G	T:T	A:A	G:G	G:A	T:T	A:C
1451	P1_B100	2020_1st	train set	case	case	G:G	T:T	C:C	G:G	G:G	A:A	G:G	G:G	T:C	T:C	T:T	G:G	A:A	A:A	C:C	T:T	G:G	C:T	A:G	A:A	A:A	A:A	G:A	G:G	C:C	T:T	C:T	T:T	G:G	C:C	A:A	T:C	G:G	A:A	T:C	A:T	C:C	G:G	T:T	G:G	A:A	G:G	T:T	A:A
1452	P1_B103	2020_1st	train set	control	control	G:G	T:T	C:C	G:G	G:G	A:A	G:G	G:G	T:C	T:C	T:T	G:G	A:A	A:A	C:C	T:T	G:G	T:T	G:G	A:A	A:A	A:A	G:A	G:G	T:T	T:T	C:C	T:T	G:G	C:C	A:A	T:C	G:G	A:A	T:C	A:T	C:C	G:G	T:T	A:A	A:G	G:G	T:T	A:C
1453	P1_B105	2020_1st	train set	control	control	G:G	T:T	C:T	G:G	G:G	A:A	G:G	G:T	T:C	T:C	T:T	G:C	A:G	A:A	C:C	T:T	G:G	C:T	A:G	A:A	A:A	A:A	G:A	G:G	C:T	T:A	C:C	T:T	G:G	C:A	A:A	T:C	G:G	T:A	T:C	A:T	C:C	G:G	T:T	G:A	A:G	G:A	T:T	A:C
1454	P1_B108	2020_1st	train set	case	case	G:G	T:T	C:C	G:G	G:G	A:A	G:G	G:G	T:C	T:C	T:T	G:G	A:A	A:A	T:T	T:T	G:G	C:T	G:G	A:A	A:A	A:G	G:A	G:G	C:T	T:A	C:C	T:T	G:G	C:A	A:A	T:C	G:A	A:A	T:C	T:T	C:C	G:G	T:G	G:A	A:G	G:A	T:T	A:C
1455	P1_B111	2020_1st	train set	case	case	No Call	T:T	C:C	G:G	G:G	A:A	G:G	G:G	T:C	T:C	T:T	G:G	A:A	A:A	C:C	T:T	G:G	C:T	A:G	A:A	A:A	A:A	G:A	G:G	C:C	T:T	C:C	T:T	G:G	C:A	A:A	T:T	G:G	T:T	T:C	A:T	C:C	G:G	T:T	A:A	A:A	G:G	T:T	C:C
1456	P1_B118	2020_1st	train set	case	case	G:G	T:T	C:C	G:G	G:G	A:A	G:G	G:T	T:C	T:C	T:T	G:G	A:G	A:A	C:C	T:T	G:G	C:T	A:G	A:A	A:A	A:G	G:A	G:G	C:T	T:A	C:C	T:T	G:G	C:C	A:A	T:T	G:G	T:A	T:C	T:T	C:C	G:G	T:G	G:G	A:A	G:G	T:T	A:A
1457	P1_B120	2020_1st	train set	control	control	G:G	T:T	C:C	G:G	G:G	A:A	G:G	G:G	T:C	T:C	T:T	G:G	A:A	A:A	C:T	T:T	G:G	C:T	A:G	A:A	A:A	A:G	G:A	G:G	C:T	T:T	C:C	T:T	G:G	C:C	A:A	T:T	G:G	A:A	T:C	T:T	C:C	G:G	T:G	G:G	A:A	G:A	T:T	A:C
1458	P1_B124	2020_1st	test set	case	case	G:G	T:T	C:C	G:G	G:G	A:A	G:G	G:G	T:T	T:C	T:T	G:G	A:G	A:A	C:C	T:T	G:G	C:T	A:G	A:A	A:A	A:G	G:A	G:G	T:T	T:T	C:C	T:T	G:G	C:C	A:A	T:C	G:G	A:A	T:C	A:A	C:T	G:G	T:T	G:G	A:A	G:A	T:T	A:A
1459	P1_B127	2020_1st	train set	case	case	G:G	T:T	C:C	G:C	G:G	A:A	G:G	G:G	T:C	T:C	T:T	G:G	A:A	A:A	C:C	T:T	G:G	C:T	G:G	A:A	A:A	A:A	G:A	G:G	C:C	T:A	C:C	T:T	G:G	C:C	A:A	C:C	G:G	A:A	T:C	A:T	C:C	G:G	T:T	G:A	A:A	G:G	T:T	C:C
1460	P1_B128	2020_1st	train set	case	case	G:G	T:T	C:C	G:G	G:G	A:A	G:G	G:G	T:C	T:C	T:C	G:G	A:A	A:A	C:T	T:T	G:G	C:T	A:G	A:A	A:A	A:A	G:A	G:G	C:T	T:T	C:C	T:T	G:G	C:C	A:A	T:C	G:G	T:T	T:C	A:A	C:C	G:G	T:T	A:A	A:A	G:G	T:T	A:C
1461	P1_B131	2020_1st	train set	control	control	G:G	T:T	C:T	G:G	G:G	A:A	G:G	G:G	T:T	T:C	T:T	G:G	A:A	A:A	C:C	T:T	G:G	C:T	A:G	A:A	A:A	A:A	G:A	G:G	C:T	T:A	C:T	T:T	G:G	C:C	A:A	T:C	G:A	T:A	T:C	A:A	C:T	G:G	T:T	A:A	A:G	G:A	T:T	A:A
1462	P1_B139	2020_1st	train set	case	case	G:G	T:T	C:T	G:G	G:G	A:A	G:G	G:G	T:C	T:C	T:T	G:G	A:A	A:A	T:T	T:T	G:G	C:T	A:G	A:A	A:A	A:G	G:A	G:G	C:T	T:T	C:C	T:T	G:G	C:C	A:A	T:C	G:A	A:A	T:C	A:A	T:T	G:G	T:T	A:A	A:G	A:A	T:T	A:C
1463	P1_B141	2020_1st	test set	case	control	G:G	T:T	T:T	G:G	G:G	A:A	G:G	G:G	T:C	T:C	T:T	G:G	A:A	A:A	C:C	T:T	G:G	C:T	A:G	A:A	A:A	A:A	G:A	G:G	T:T	T:T	C:T	T:T	G:G	C:C	A:A	T:C	G:G	T:A	T:C	A:T	C:C	G:G	T:T	G:A	A:A	G:A	T:T	A:C
1464	P1_B142	2020_1st	train set	case	case	G:G	T:T	T:T	G:G	G:G	A:A	G:G	G:G	T:T	T:C	T:T	G:G	A:A	A:A	T:T	T:T	G:G	C:T	A:G	A:A	A:A	A:G	G:A	G:G	T:T	T:T	C:T	T:T	G:G	C:A	A:A	T:C	G:G	A:A	T:C	A:A	C:T	G:G	T:T	G:G	A:A	G:A	T:T	A:C
1465	P1_B143	2020_1st	train set	case	case	G:G	T:T	T:T	G:G	G:G	A:A	G:G	G:G	T:C	T:C	T:T	G:G	A:A	A:A	C:C	T:T	G:G	C:T	A:G	A:A	A:A	A:G	G:A	G:G	T:T	T:T	C:T	T:T	G:G	C:A	A:A	T:T	G:G	A:A	T:C	A:A	C:C	G:G	T:T	A:A	A:A	G:A	T:T	C:C
1466	P1_B144	2020_1st	train set	case	case	G:G	T:T	C:C	G:G	G:G	A:A	G:G	G:G	T:C	T:C	T:T	G:G	A:G	A:A	C:C	T:T	G:G	C:T	A:G	A:A	A:A	A:A	G:A	G:G	C:T	T:T	C:C	T:T	G:G	C:C	A:A	T:T	G:G	A:A	T:C	A:A	C:C	G:G	T:G	G:G	A:A	G:G	T:T	A:C
1467	P1_B147	2020_1st	train set	control	control	G:G	T:T	C:C	G:G	G:G	A:A	G:G	G:G	C:C	T:C	T:T	G:G	A:A	A:A	C:C	T:T	G:G	C:T	A:G	A:A	A:A	A:A	G:A	G:G	C:T	T:T	C:C	T:T	G:G	C:A	A:A	T:T	G:G	T:T	T:C	A:A	C:C	G:G	T:T	G:G	A:A	G:G	T:T	A:C
1468	P1_B149	2020_1st	train set	control	control	G:G	T:T	C:C	G:G	G:G	A:A	G:G	G:G	T:C	T:C	T:T	G:G	A:A	A:A	T:T	T:T	G:G	C:T	A:G	A:A	A:A	G:G	G:A	G:G	C:T	T:T	C:C	T:T	G:G	C:C	A:A	T:T	A:A	A:A	T:C	A:T	C:C	G:G	T:T	G:A	A:G	G:A	T:T	A:C
1469	P1_B151	2020_1st	train set	case	case	G:G	T:T	C:C	G:G	G:G	A:A	G:G	G:G	C:C	T:C	T:C	G:G	A:A	A:A	T:T	T:T	G:G	C:T	A:G	A:A	A:A	A:A	G:A	G:G	T:T	T:T	C:C	T:T	G:G	C:C	A:A	T:T	G:G	T:T	T:C	A:A	C:C	G:G	T:T	G:G	A:G	G:G	T:T	A:C
1470	P1_B153	2020_1st	train set	control	control	G:G	T:T	C:C	G:G	G:G	A:A	G:G	G:G	T:C	T:C	T:T	G:G	A:A	A:A	C:C	T:T	G:G	C:T	A:G	A:A	A:A	A:A	G:A	G:G	C:T	T:T	C:C	T:T	G:G	C:A	A:A	T:T	G:G	T:T	T:C	A:T	C:C	G:G	T:G	G:G	A:A	G:G	T:T	A:A
1471	P1_B154	2020_1st	train set	control	control	G:G	T:T	C:T	G:G	G:G	A:A	G:G	G:G	C:C	T:C	T:T	G:G	A:A	A:A	C:C	T:T	G:G	C:T	A:G	A:A	A:A	A:G	G:A	G:G	C:T	T:T	C:C	T:T	G:G	C:A	A:A	T:T	G:G	T:A	T:C	A:A	C:C	G:G	T:T	A:A	A:A	G:A	T:T	A:C
1472	P1_B155	2020_1st	train set	case	case	G:G	T:T	C:C	G:G	G:G	A:A	G:G	G:G	T:C	T:C	T:T	G:G	A:A	A:A	C:C	T:T	G:G	C:T	A:G	A:A	A:A	A:A	G:A	G:G	C:T	T:T	C:C	T:T	G:G	C:A	A:A	T:T	G:G	T:T	T:C	A:A	C:C	G:G	T:T	A:A	A:G	G:G	T:T	A:C
1473	P1_B159	2020_1st	train set	case	case	G:G	T:T	C:C	G:G	G:G	A:A	G:G	G:T	T:C	T:C	T:T	G:G	A:A	A:A	C:C	T:T	G:G	C:T	A:G	A:A	A:A	A:A	G:A	G:G	C:T	T:T	C:C	T:T	G:G	C:A	A:A	T:T	G:G	T:T	T:C	A:A	C:C	G:G	T:T	G:G	A:A	G:G	T:T	A:C
1474	P1_B162	2020_1st	train set	control	control	G:G	T:T	C:C	G:G	G:G	A:A	G:G	G:G	T:C	T:C	C:C	G:G	A:A	G:G	C:C	T:T	G:G	C:T	A:G	A:A	A:A	A:G	G:A	G:G	C:C	T:A	C:C	T:T	G:G	C:C	A:A	T:C	G:A	T:A	T:C	T:T	C:C	G:G	T:G	G:A	A:G	G:A	T:T	A:C
1475	P1_B164	2020_1st	train set	case	case	G:G	T:T	C:C	G:G	G:G	A:A	G:G	G:G	T:C	T:C	T:T	G:G	A:A	A:A	C:C	T:T	G:G	C:T	A:G	A:A	A:A	A:G	G:A	G:G	T:T	T:T	C:T	T:T	G:A	C:A	A:A	T:C	G:G	A:A	T:C	A:A	C:T	G:G	T:T	G:G	A:G	G:G	T:T	A:C
1476	P1_B165	2020_1st	train set	control	control	G:G	T:T	C:C	G:G	G:G	A:A	G:G	G:T	T:C	T:C	T:T	G:G	A:G	A:A	C:C	T:T	G:G	C:T	A:G	A:A	A:A	A:A	G:A	G:G	C:C	T:T	C:C	T:T	G:G	C:A	A:A	T:T	G:A	A:A	T:C	A:A	C:T	G:G	T:G	A:A	A:A	G:A	T:T	A:A
1477	P1_B167	2020_1st	train set	control	control	G:G	T:T	C:T	G:G	G:G	A:A	G:G	G:G	T:C	T:C	T:T	G:G	A:A	A:A	C:C	T:T	G:G	C:T	A:G	A:A	A:A	A:G	G:A	G:G	C:T	T:T	C:T	T:T	G:G	C:A	A:A	T:T	G:G	T:T	T:C	A:A	C:C	G:G	T:T	G:G	A:A	G:A	T:T	C:C
1478	P1_B170	2020_1st	train set	case	case	G:G	T:T	C:C	G:C	G:G	A:A	G:G	G:G	T:C	T:C	T:T	G:G	A:A	A:A	C:C	T:T	G:G	C:T	G:G	A:A	A:A	A:A	G:A	G:G	C:T	T:T	C:C	T:T	G:G	C:C	A:A	T:C	G:G	A:A	T:C	A:A	C:C	G:G	T:T	G:G	A:G	G:G	T:T	A:C
1479	P1_B171	2020_1st	train set	case	case	G:G	T:T	C:C	G:G	G:G	A:A	G:G	G:G	T:T	T:C	T:C	G:G	A:G	A:A	T:T	T:T	G:G	T:T	G:G	A:A	A:A	A:A	G:A	G:G	C:T	T:A	C:C	T:T	G:G	C:C	A:A	T:C	G:G	A:A	T:C	T:T	C:C	G:G	T:G	G:G	A:G	G:A	T:T	A:C
1480	P1_B172	2020_1st	train set	case	case	G:G	T:T	C:C	G:G	G:G	A:A	G:G	G:T	T:T	T:C	T:T	G:G	A:G	A:A	C:C	T:T	G:G	C:T	A:G	A:A	A:A	A:A	G:A	G:G	C:C	T:A	C:C	T:T	G:G	C:C	A:A	T:C	G:G	T:A	T:C	A:T	C:C	G:G	T:G	G:G	A:G	G:G	T:T	A:C
1481	P1_B174	2020_1st	train set	control	control	G:G	T:T	C:T	G:G	G:G	A:A	G:G	G:G	T:C	T:C	T:T	G:G	A:A	A:G	C:C	T:T	G:G	C:T	A:G	A:A	A:A	A:G	G:A	G:G	C:T	T:T	C:C	T:T	G:G	A:A	A:A	T:T	G:G	T:T	T:C	A:A	C:C	G:G	T:T	G:G	A:A	G:G	T:T	A:A
1482	P1_B178	2020_1st	train set	control	control	G:G	T:T	C:C	G:G	G:G	A:A	G:G	G:G	T:C	T:C	T:T	G:G	A:A	G:G	C:C	T:T	G:G	No Call	G:G	A:A	A:A	G:G	G:A	G:G	C:T	T:T	C:C	T:T	G:G	C:A	A:A	T:T	G:A	T:A	T:C	T:T	C:C	G:G	T:G	G:A	A:A	G:A	T:T	A:C
1483	P1_B179	2020_1st	train set	control	control	G:G	T:T	T:T	G:G	G:G	A:A	G:G	G:G	C:C	T:C	T:C	G:G	A:A	A:A	C:C	T:T	G:G	C:T	A:G	A:A	A:A	A:A	G:A	G:G	T:T	T:T	C:C	T:T	G:G	C:A	A:A	T:T	G:G	T:A	T:C	A:A	C:C	G:G	T:T	A:A	A:G	G:G	T:T	C:C
1484	P1_B180	2020_1st	train set	case	case	G:G	T:T	C:C	G:G	G:G	A:A	G:G	G:T	T:C	T:C	T:C	G:G	A:A	A:A	C:T	T:T	G:G	C:T	A:G	A:A	A:A	A:A	G:A	G:G	C:C	T:A	C:C	T:T	G:G	C:C	A:A	T:T	G:G	A:A	T:C	A:T	C:C	G:G	T:T	G:G	A:G	G:A	T:T	A:A
1485	P1_B182	2020_1st	train set	case	case	G:G	T:T	C:C	G:G	G:G	A:A	G:G	G:T	T:T	T:C	T:T	G:G	A:A	A:A	T:T	T:T	G:G	T:T	G:G	A:A	A:A	A:A	G:A	G:G	T:T	T:A	C:C	T:T	G:G	C:C	A:A	T:T	G:G	T:A	T:C	A:T	C:C	G:G	T:T	G:G	G:G	A:A	T:T	A:C
1486	P1_B184	2020_1st	test set	case	control	No Call	T:T	T:T	G:G	G:G	A:A	G:G	G:G	C:C	T:C	T:T	G:G	A:A	A:A	C:C	T:T	G:G	C:T	A:G	A:A	A:A	A:A	G:A	G:G	T:T	T:T	C:C	T:T	G:G	C:A	A:A	T:C	G:A	T:T	T:C	A:A	C:T	G:G	T:T	G:G	A:A	G:A	T:T	C:C
1487	P1_B193	2020_1st	train set	control	control	No Call	T:T	C:C	G:G	G:G	A:A	G:G	G:G	T:T	T:C	T:T	G:G	A:A	A:A	C:C	T:T	G:G	C:T	A:G	A:A	A:A	A:A	G:A	G:G	C:T	T:T	C:C	T:T	G:G	C:A	A:A	T:T	G:G	T:T	T:C	A:T	C:C	G:G	T:G	G:G	A:A	G:G	T:T	C:C
1488	P1_B195	2020_1st	train set	control	control	G:G	T:T	C:T	G:G	G:G	A:A	G:G	G:G	T:C	T:C	T:T	G:G	A:A	A:A	C:C	T:T	G:G	C:T	A:G	A:A	A:A	A:A	G:A	G:G	C:T	T:A	C:T	T:T	G:G	C:A	A:A	T:T	G:G	T:A	T:C	A:A	C:C	G:G	T:T	A:A	A:G	G:A	T:T	A:A
1489	P1_B197	2020_1st	test set	case	case	G:G	T:T	T:T	G:G	G:G	A:A	G:G	G:G	T:C	T:C	T:T	G:G	A:A	A:A	C:C	T:T	G:G	C:T	A:G	A:A	A:A	A:G	G:A	G:G	T:T	T:T	C:T	T:T	G:G	C:A	A:A	T:C	G:G	T:T	T:C	A:A	C:T	G:G	T:T	A:A	A:A	G:A	T:T	A:C
1490	P1_B199	2020_1st	train set	control	control	G:G	T:T	C:C	G:G	G:G	A:A	G:G	G:G	T:C	T:C	T:C	G:G	A:A	A:A	C:T	T:T	G:G	C:T	A:G	A:A	A:A	A:A	G:A	G:G	C:T	T:T	C:C	T:T	G:G	A:A	A:A	T:T	G:G	T:A	T:C	A:A	C:C	G:G	T:T	G:G	A:A	G:G	T:T	A:C
1491	P1_B202	2020_1st	train set	control	control	No Call	T:T	C:T	G:G	G:G	A:A	G:G	G:G	T:C	T:C	T:T	G:G	A:A	A:A	C:C	T:T	G:G	C:T	A:G	A:A	A:A	A:G	G:A	G:G	C:T	T:T	C:C	T:T	G:G	C:C	A:A	T:T	G:A	A:A	T:C	A:T	C:C	G:G	T:T	G:A	A:G	G:A	T:T	C:C
1492	P1_B203	2020_1st	train set	case	case	G:G	T:T	C:C	G:G	G:G	A:A	G:G	G:T	T:C	T:C	T:T	G:G	A:G	A:A	C:C	T:T	G:G	C:T	A:G	A:A	A:A	A:A	G:A	G:G	C:C	T:T	C:C	T:T	G:G	C:C	A:A	T:T	G:G	T:T	T:C	A:T	C:C	G:G	T:T	G:G	A:A	G:G	T:T	A:C
1493	P1_B205	2020_1st	train set	control	control	G:G	T:T	C:C	No Call	A:A	A:A	G:G	G:T	T:C	T:C	T:T	G:G	A:G	A:A	C:C	T:T	G:G	C:T	No Call	A:A	A:A	A:A	G:A	G:G	C:T	T:T	C:C	T:T	G:G	C:C	A:A	T:T	G:G	T:T	T:C	A:T	C:C	G:G	G:G	A:A	A:A	G:G	T:T	A:A
1494	P1_B211	2020_1st	train set	control	control	G:G	T:T	C:C	G:G	G:G	A:A	G:G	G:T	T:T	T:C	T:T	G:G	A:A	A:A	T:T	T:T	G:G	C:T	A:G	A:A	A:A	A:A	G:A	G:G	C:T	T:A	C:C	T:T	G:G	C:C	A:A	T:T	G:G	A:A	T:C	A:T	C:C	G:G	T:T	G:G	A:G	A:A	T:T	A:A
1495	P1_B213	2020_1st	train set	case	case	G:G	T:T	C:C	G:G	G:G	A:A	G:G	G:G	C:C	T:C	T:T	G:G	A:A	A:A	C:C	T:T	G:G	T:T	G:G	A:A	A:A	A:A	G:A	G:G	T:T	T:T	C:C	T:T	G:G	C:A	A:A	T:T	G:A	A:A	T:C	A:T	C:C	G:G	T:G	G:G	A:A	G:G	T:T	C:C
1496	P1_B216	2020_1st	train set	control	control	No Call	T:T	C:T	G:G	G:G	A:A	G:G	G:G	T:C	T:C	T:T	G:G	A:A	A:A	C:C	T:T	G:G	C:T	A:G	A:A	A:A	A:A	G:A	G:G	C:T	T:T	C:T	T:T	G:G	C:A	A:A	T:C	G:G	T:A	T:C	A:A	C:T	G:G	T:T	G:G	A:A	G:G	T:T	C:C
1497	P1_B220	2020_1st	train set	control	control	G:G	T:T	T:T	G:G	G:G	A:A	G:G	G:G	C:C	T:C	T:T	G:G	A:A	A:A	C:C	T:T	G:G	C:T	A:G	A:A	A:A	A:A	G:A	G:G	T:T	T:T	C:T	T:T	G:G	C:C	A:A	T:T	G:G	A:A	T:C	A:A	C:C	G:G	T:T	A:A	A:A	G:A	T:T	C:C
1498	P1_B221	2020_1st	train set	control	control	G:G	T:T	C:C	G:G	G:G	A:A	G:G	G:G	T:C	T:C	T:T	G:G	A:A	A:A	C:T	T:T	G:G	C:T	A:G	A:A	A:A	A:A	G:A	G:G	C:T	T:T	C:C	T:T	G:G	C:C	A:A	T:C	G:G	T:T	T:C	A:A	C:T	G:G	T:T	G:G	A:A	G:A	T:T	A:C
1499	P1_B223	2020_1st	train set	case	case	G:G	T:T	C:T	G:G	G:G	A:A	G:G	G:T	T:C	T:C	T:T	G:G	A:A	A:A	C:C	T:T	G:G	C:T	A:G	A:A	A:A	A:G	G:A	G:G	C:T	T:T	C:C	T:T	G:G	C:C	A:A	C:C	G:G	A:A	T:C	A:A	C:T	G:G	T:G	A:A	A:A	G:A	T:T	A:A
1500	P1_B224	2020_1st	train set	control	control	G:G	T:T	C:C	G:G	G:G	A:A	G:G	G:T	T:C	T:C	T:T	G:G	A:G	A:A	C:C	T:T	G:G	C:T	A:G	A:A	A:A	A:A	G:A	G:G	C:C	T:T	C:C	T:T	G:G	C:A	A:A	T:T	G:G	A:A	T:C	A:A	C:C	G:G	T:G	G:A	A:A	G:G	T:T	A:A
1501	P1_B225	2020_1st	train set	case	case	G:G	T:T	C:C	G:G	G:G	A:A	G:G	G:G	T:C	T:C	T:T	G:G	A:A	A:A	C:C	T:T	G:G	C:T	A:G	A:A	A:A	A:G	G:A	G:A	T:T	T:T	C:C	T:T	G:G	C:A	A:A	T:T	G:G	T:T	T:C	A:T	C:C	G:G	T:T	G:G	A:A	G:G	T:T	A:C
1502	P1_B227	2020_1st	train set	case	case	G:G	T:T	T:T	G:G	G:G	A:A	G:G	G:G	T:C	T:C	T:T	G:G	A:G	A:A	C:C	T:T	G:G	C:T	A:G	A:A	A:A	A:G	G:A	G:G	T:T	T:T	C:C	T:T	G:G	C:C	A:A	T:C	G:G	T:A	T:C	A:A	C:T	G:T	T:T	G:G	A:G	G:G	T:T	A:C
1503	P1_B228	2020_1st	test set	control	control	G:G	T:T	C:C	G:G	G:G	A:A	G:G	G:G	C:C	T:C	T:T	G:G	A:A	A:A	C:T	T:T	G:G	C:T	A:G	A:A	A:A	A:A	G:A	G:G	C:C	T:T	C:C	T:T	G:G	C:A	A:A	T:T	G:G	A:A	T:C	A:T	C:C	G:G	T:T	G:G	A:A	G:G	T:T	A:C
1504	P1_B230	2020_1st	train set	case	case	G:G	T:T	C:C	G:G	G:G	A:A	G:G	G:T	T:C	T:C	T:T	G:G	A:G	A:A	C:C	T:T	G:G	C:T	A:G	A:A	A:A	A:A	G:A	G:G	C:T	T:T	C:C	T:T	G:G	C:A	A:A	T:T	G:G	A:A	T:C	A:T	C:C	G:G	T:T	A:A	A:A	G:G	T:T	A:C
1505	P1_B232	2020_1st	train set	case	case	G:G	T:T	C:T	G:G	G:G	A:A	G:G	G:G	T:T	T:C	T:T	G:G	A:A	A:A	C:T	T:T	G:G	C:T	A:G	A:A	A:A	A:G	G:A	G:G	C:T	T:T	C:C	T:T	G:G	C:C	A:A	C:C	G:A	T:A	T:C	A:T	C:T	G:G	T:T	G:G	A:G	A:A	T:T	A:A
1506	P1_B233	2020_1st	train set	control	control	G:G	T:T	C:C	G:G	G:G	A:A	G:G	G:G	C:C	T:C	T:T	G:G	A:A	A:A	C:C	T:T	G:G	C:T	A:G	A:A	A:A	A:G	G:A	G:G	C:T	T:T	C:T	T:T	G:G	C:C	A:A	T:C	G:A	T:T	T:C	A:A	C:T	G:G	T:T	A:A	A:A	G:A	T:T	A:C
1507	P1_B235	2020_1st	train set	case	case	G:G	T:T	C:C	G:C	G:G	A:A	G:G	G:G	C:C	T:C	T:T	G:G	A:A	A:A	C:C	T:T	G:G	C:T	A:G	A:A	A:A	A:A	G:A	G:G	C:T	T:T	C:C	T:T	G:G	C:C	A:A	T:C	G:G	A:A	T:C	A:A	C:C	G:G	T:T	A:A	A:A	G:G	T:T	A:C
1508	P1_B240	2020_1st	train set	case	case	G:G	T:T	T:T	G:G	G:G	A:A	G:G	G:G	C:C	T:C	T:T	G:G	A:A	A:A	C:C	T:T	G:G	C:T	A:G	A:A	A:A	A:A	G:A	G:G	T:T	T:T	C:T	T:T	G:G	C:C	A:A	T:C	G:G	T:A	T:C	A:A	C:T	G:G	T:T	G:G	A:A	G:A	T:T	A:C
1509	P1_B250	2020_1st	test set	control	control	G:G	T:T	C:C	G:G	G:G	A:A	G:G	G:G	T:C	T:C	T:T	G:G	A:A	A:A	C:C	T:T	G:G	C:T	A:G	A:A	A:A	A:A	G:A	G:G	C:T	T:T	C:T	T:T	G:G	C:A	A:A	T:C	A:A	T:A	T:C	A:A	T:T	G:G	T:T	A:A	A:G	G:A	T:T	A:C
1510	P1_B251	2020_1st	train set	case	case	G:G	T:T	C:C	G:G	G:G	A:A	G:G	G:T	T:T	T:C	T:T	G:G	A:G	A:A	C:C	T:T	G:G	C:T	A:G	A:A	A:A	A:A	G:A	G:G	C:T	T:T	C:C	T:T	G:G	C:C	A:A	T:T	G:A	A:A	T:C	A:A	C:C	G:G	T:G	G:A	A:A	G:G	T:T	A:C
1511	P1_B252	2020_1st	train set	control	control	No Call	T:T	T:T	G:G	G:G	A:A	G:G	G:G	T:C	T:C	T:T	G:G	A:A	A:A	C:C	T:T	G:G	C:T	G:G	A:A	A:A	A:A	G:A	G:G	T:T	T:T	C:T	T:T	G:G	C:C	A:A	T:C	G:A	T:A	T:C	A:A	C:T	G:G	T:T	G:G	A:A	G:A	T:T	C:C
[truncated: 771 more rows]
[truncated: 52 more columns]

## Sheet: 4. ML Dataset combinations
Supplementary Table 4: Summaries machines prediction scores for three different datasets.
[truncated: 25 more rows]

## Sheet: 5. SNP Genomics coordinates 
Supplementary Table 5: Summaries of genomic co-ordinates and SNP feature selection score from seven different machine.
[truncated: 97 more rows]
